# Supplementary material for: A comprehensive view of the molecular features within the serum and serum EV of Alzheimer's disease
Source: Royal Society of Chemistry journal article supplement (doi:10.1039/d4an01018c), 2025-01-01
Supplement: d4an01018c2.pdf [file d4an01018c2.pdf]

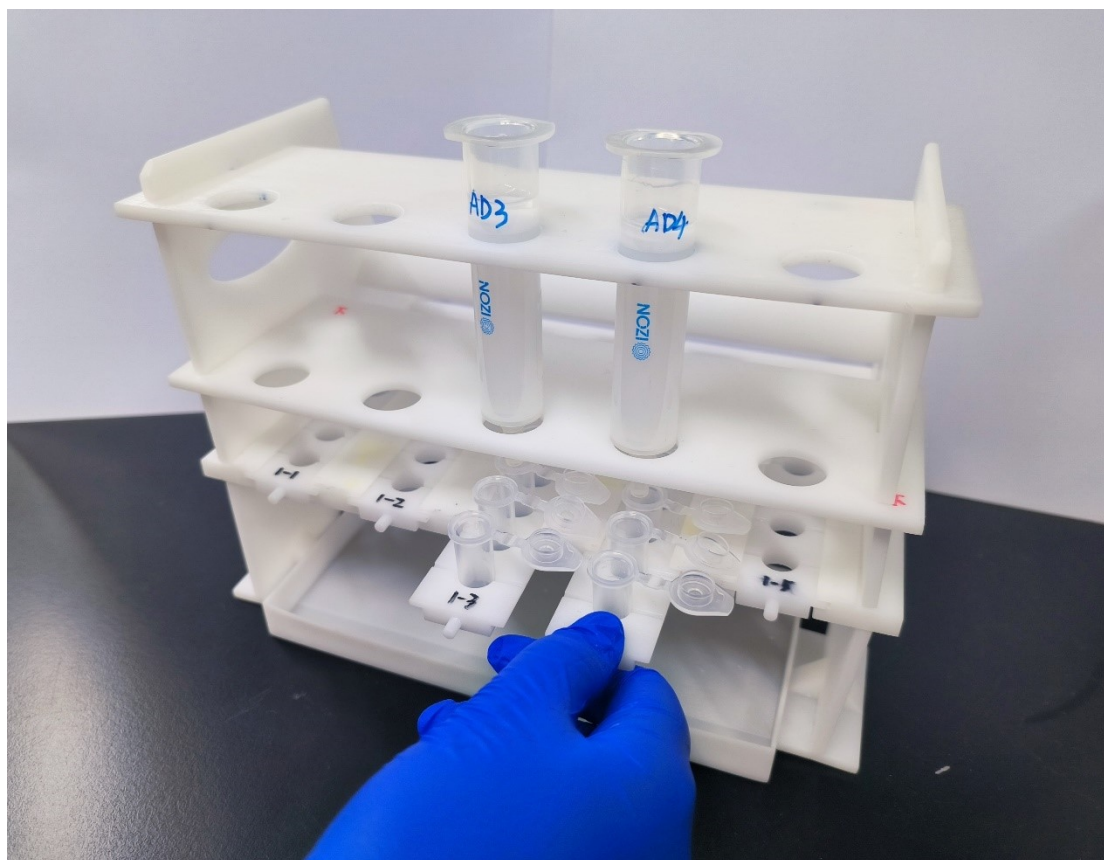

**Figure S1. Schematic diagram of collection.** 3D-printed integrated adapter collected the fractions from the qEV separation columns.

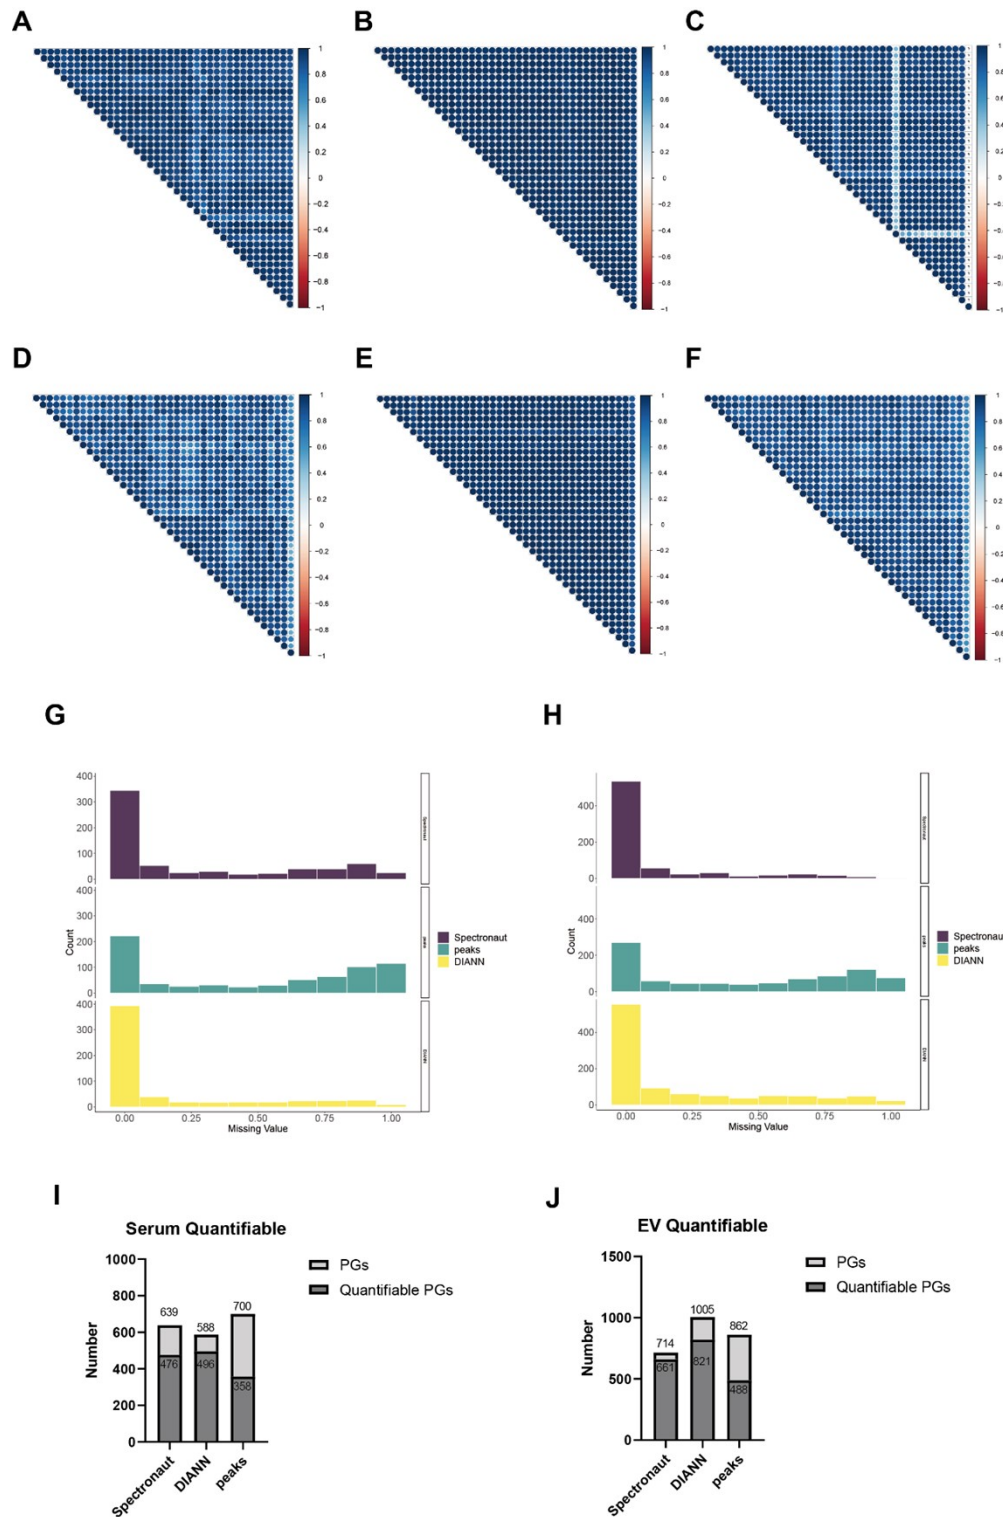

**Figure S2. Software suites performance assessment in analyzing serum and serum EV proteomic data.** (A-C) The correlation of 39 serum samples from Spectronaut, peaks and DIANN (left to right); (D-F) The correlation of 39 serum EV samples from Spectronaut, peaks and DIANN (left to right); (G) The Missing value distribution of 39 serum samples from Spectronaut, peaks and DIANN (left to right); (H) The Missing value distribution of 39 serum EV samples from Spectronaut, peaks and DIANN (left to right); (I and J) Performance of proteome identification and quantification in three software.

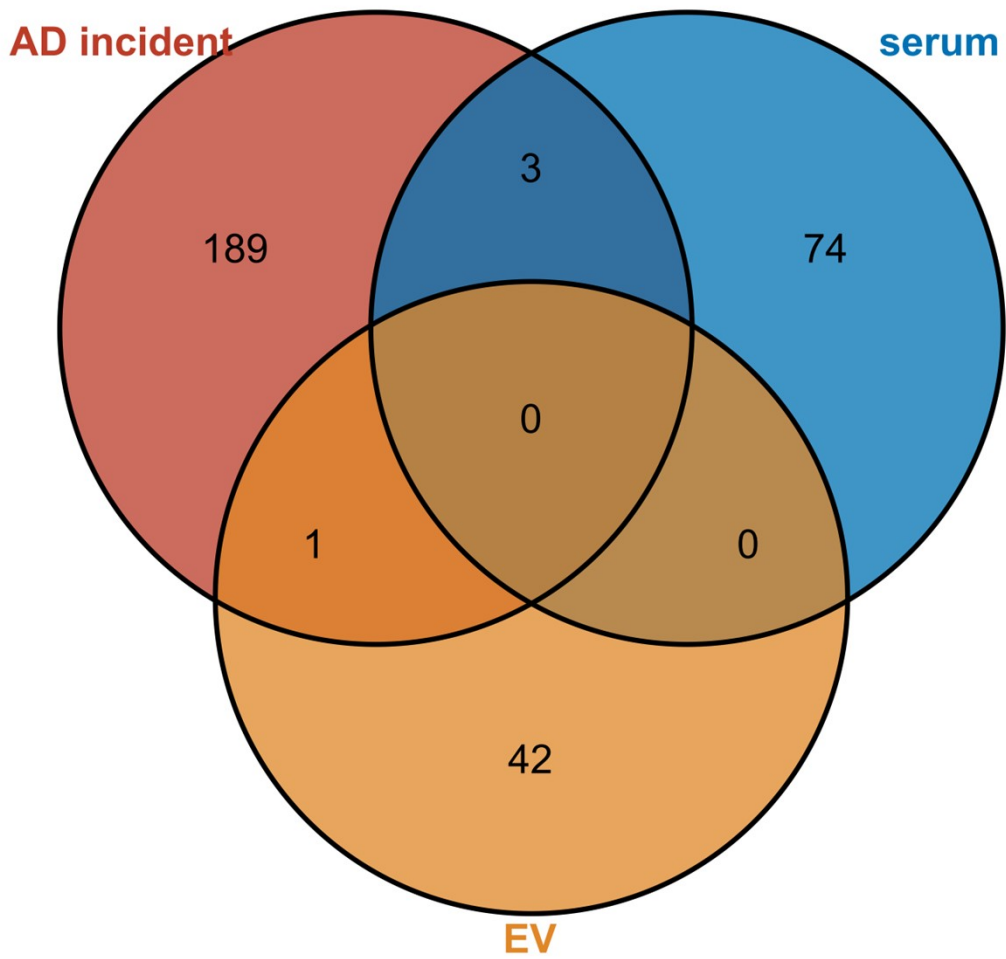

**Figure S3. External data comparison.** (A) Comparison between differentially expressed protein groups in Figure3 and external data.

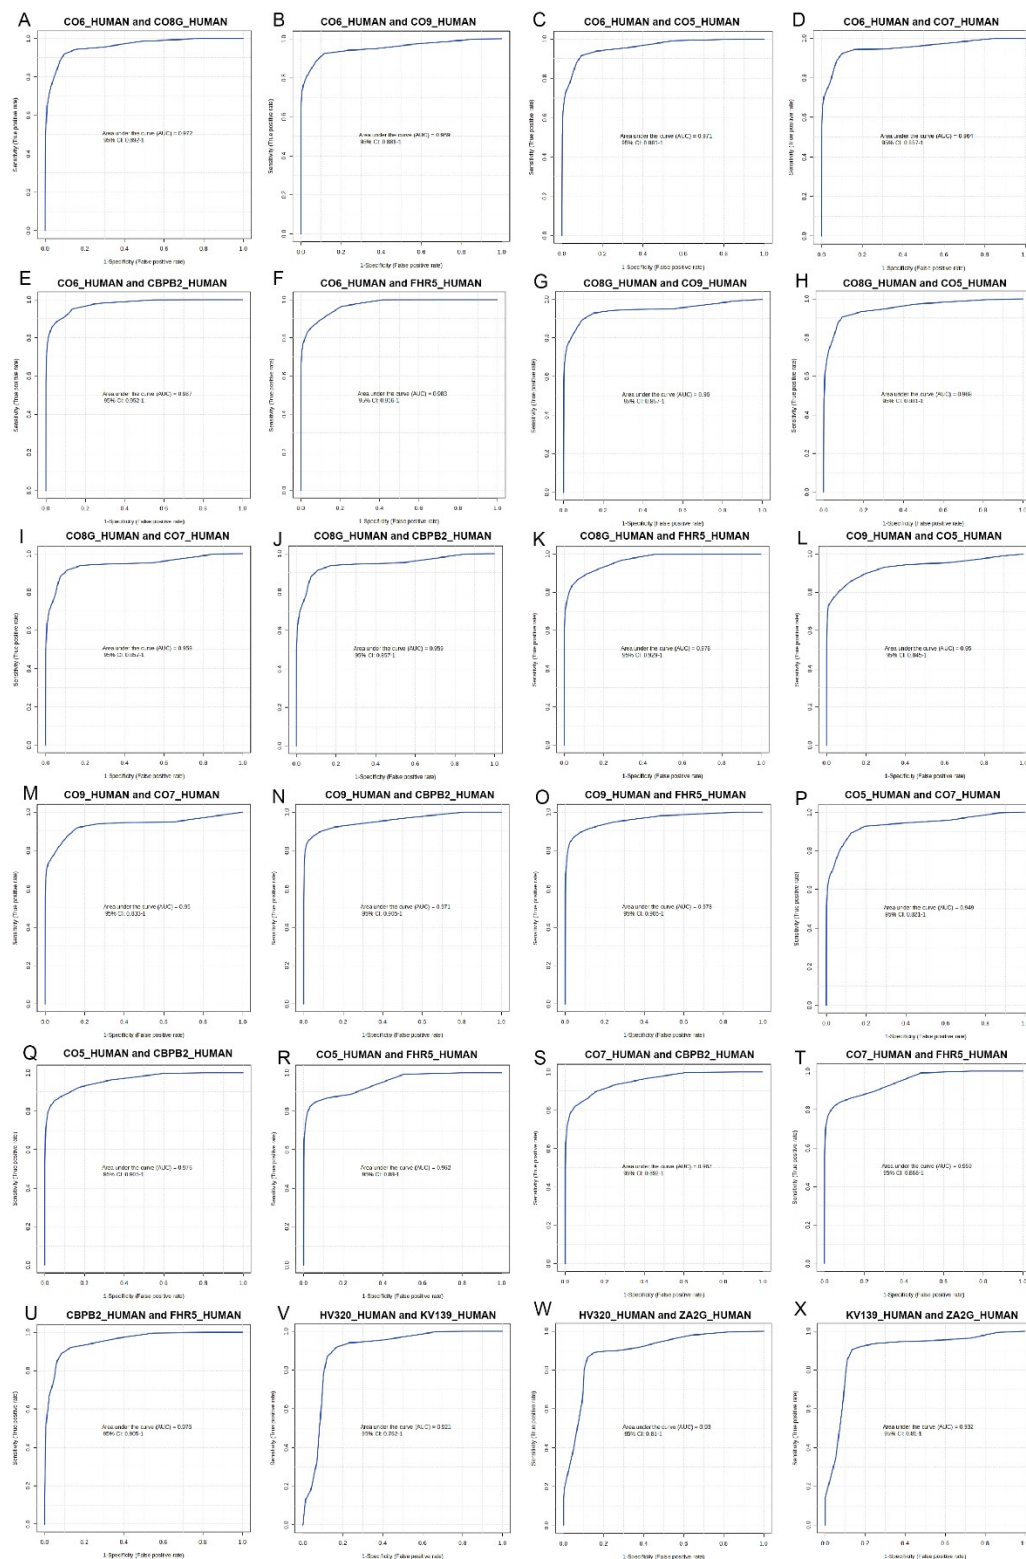

**Figure S4. Diagnostic effect of the pairwise combination using top ten molecules. (A-U)** Diagnostic effect of the pairwise combination using top seven molecules from serum EV. **(V-X)** Diagnostic effect of the pairwise combination using top three molecules from serum.
