# Supplementary material for: A comprehensive view of the molecular features within the serum and serum EV of Alzheimer's disease
Source: Royal Society of Chemistry journal article supplement (doi:10.1039/d4an01018c), 2025-01-01
Supplement: d4an01018c3.xlsx [file d4an01018c3.xlsx]

## Sheet: clinical information
Table S1 Clinical information
Patient sample ID	Age	Sex	MMSE score	CDR	Pathology
AD1	68	Female	18	0.5	(+)
AD2	63	Female	13	1	(+)
AD3	59	Male	12	0.5	(+)
AD4	71	Female	23	0.5	(+)
AD5	77	Male	23	0.5	(+)
AD6	58	Male	7	0.5	(+)
AD7	17	Female	17	1	(+)
AD8	59	Female	8	2	(+)
AD9	79	Female	19	1	(+)
AD10	60	Female	14	0.5	(+)
AD11	76	Male	17	2	(+)
AD12	62	Female	5	2	(+)
AD13	82	Female	13	1	(+)
AD14	67	Female	19	0.5	(+)
AD15	68	Female	17	1	(+)
AD16	71	Male	5	3	(+)
AD17	84	Male	11	2	(+)
AD18	52	Female	12	2	(+)
AD19	68	Female	17	2	(+)
