# Supplementary material for: A comprehensive view of the molecular features within the serum and serum EV of Alzheimer's disease
Source: Royal Society of Chemistry journal article supplement (doi:10.1039/d4an01018c), 2025-01-01
Supplement: d4an01018c5.xlsx [file d4an01018c5.xlsx]

## Sheet: Quantification
	AC1	AC2	AC3	AC4	AC5	AC6	AC7	AC8	AC9	AC10	AC11	AC12	AC13	AC14	AC15	AC16	AC17	AC18	AC19	AC20	AD1	AD2	AD3	AD4	AD5	AD6	AD7	AD8	AD9	AD10	AD11	AD12	AD13	AD14	AD15	AD16	AD17	AD18	AD19
A0A075B6H9	2256.34	1176.33	1103.59	597.372	1124.42	744.286	1019.61	883.701	1363.03	1167.76	1958.28	1128.17	1071.93	527.114	726.699	2811.34	1021.22	559.147	530.516	891.68	1160.8	2426.3	814.748	1463.41	2616.23	519.033	1491.98	1291.5	2227.62	2077.13	2689.91	1919.16	859.367	1762.67	3263.58	1425.45	2082.59	2760.89	2072.44
A0A075B6I0	1822.72	1834.22	2686.45	404.895	1493.32	2193.42	173.899	2261.24	1925.75	2022.8	4191.62	1218.37	853.088	3042.93	1462.52	2260	341.067	328.183	1123.7	1094.28	1665.88	3339.27	1512.95	383.202	605.133	1087.48	514.232	1222.96	197.272	1905.15	2100.23	1553.81	1259.54	981.768	450.025	1098.19	1437.49	5363.28	1213.4
A0A075B6I1	208.774	179.178	78.7178	88.091	193.332	115.654	137.338	129.433	238.958	165.845	417.478	46.0327	155.239	102.669	111.009	266.303	84.621	59.4689	139.82	78.3834	17.4171	27.3122	25.6814	106.938	478.955	263.391	282.827	522.538	275.435	15.4917	521.671	29.5242	261.544	9.77529	487.603	234.959	20.6532	27.0186	39.6768
A0A075B6I4	39.5115	191.713	51.8002	30.1275	258.748	115.374	180.454	98.038	94.7652	131.931	127.693	181.929	177.498	18.1859	103.949	100.053	49.9073	72.3976	101.063	179.851	179.674	131.639	120.014	82.99	16.7589	264.974	41.6907	19.5513	226.147	240.762	39.4551	231.561	20.9843	40.9122	25.2733	183.649	177.522	347.359	671.673
A0A075B6I7	15.4711	25.1366	22.0915	22.7228	43.5862	19.4275	26.2486	75.5649	10.6659	49.9123	96.335	24.8787	33.2049	24.728	29.0788	35.7261	22.0574	10.1384	30.0908	44.9942	32.8174	22.5792	11.7301	35.7415	42.4876	38.9183	35.8511	39.2305	23.5937	44.727	83.4357	28.0451	30.3835	36.4363	84.3513	18.1014	36.8223	35.6532	18.2049
A0A075B6I9	212.531	206.354	210.904	37.9479	185.754	98.6298	121.292	56.0603	78.0512	65.8578	222.471	194.22	165.222	131.75	87.5992	155.042	347.448	97.0141	97.8212	182.842	162.652	523.044	108.425	108.547	314.344	53.3877	260.542	387.903	167.731	318.99	815.066	196.476	241.319	160.462	297.511	201.133	449.359	388.619	139.96
A0A075B6J2	48.7392	28.2465	34.5342	20.3292	30.7251	89.2159	38.6661	30.2067	36.1637	22.2443	30.2067	35.4055	46.7508	34.1272	20.3292	30.2067	21.5655	28.2465	20.3292	30.2067	49.4531	46.3696	28.2465	32.7923	48.8678	10.2401	84.352	51.1442	41.3729	12.7866	33.6926	64.2827	62.6153	50.4646	39.7615	52.567	48.196	43.8656	55.3962
A0A075B6J9	387.299	413.388	98.2371	176.669	291.01	218.455	227.107	265.159	147.639	280.632	214.856	374.119	232.639	243.295	213.588	205.984	779.718	336.036	112.889	215.959	338.921	277.865	155.712	472.102	347.472	104.161	165.583	279.875	276.926	342.223	459.349	151.161	114.074	186.896	14.0621	328.258	511.031	437.05	383.036
A0A075B6K4	459.673	611.978	735.096	486.792	235.927	568.392	663.95	754.229	666.055	698.851	526.486	755.322	664.787	595.471	485.561	1079.14	725.832	591.283	583.042	419.792	707.983	424.61	395.669	1079.17	442.332	357.658	680.818	1589.58	328.469	644.668	1517.56	484.059	718.622	325.665	875.979	922.826	569.945	804.395	541.399
A0A075B6K5	351.474	346.154	403.834	317.024	338.394	390.264	408.435	298.172	362.052	303.992	534.035	422.59	490.478	344.83	568.969	872.561	423.974	486.348	373.051	233.558	563.044	465.475	255.437	626.742	423.108	325.022	398.774	777.91	431.848	666.329	824.936	608.952	670.055	274.709	587.335	789.777	473.912	722.198	442.102
A0A075B6P5;P01615	57.2238	73.6592	31.5991	22.6174	110.016	16.6463	80.2325	41.0502	34.4127	14.0988	70.4326	117.12	122.721	65.9938	51.6712	14.7133	42.6927	47.6366	31.2684	21.2745	75.0878	110.508	42.2314	50.8676	71.7256	45.479	87.4752	122.207	73.6429	51.6059	133.314	89.6344	69.5153	54.1532	88.4675	87.151	140.251	66.0815	81.639
A0A075B6Q5	1465.17	283.63	245.494	267.442	807.969	696.52	392.344	663.822	248.666	478.333	406.552	480.571	631.322	681.062	373.532	523.965	744.061	482.372	379.56	376.434	564.954	662.901	128.633	348.69	346.489	375.323	464.617	1202.7	442.762	431.226	558.868	587.093	537.947	481.567	572.501	342.472	1140.01	633.831	581.127
A0A075B6R2;A0A087WW49	163.59	111.571	148.581	183.453	81.7591	48.052	236.898	63.689	149.394	26.041	388.644	54.8878	64.2424	424.485	23.1057	409.518	122.355	34.5605	142.414	24.5659	359.619	66.0303	30.0941	27.7084	419.02	56.9955	174.888	476.588	158.582	564.5	1023.98	428.87	129.795	136.87	298.108	71.334	183.983	388.865	318.963
A0A075B6R9;A0A0C4DH68	438.199	142.832	221.907	45.4535	340.167	30.6131	685.496	132.025	93.5315	85.6618	236.446	237.544	490.903	285.285	163.996	173.735	86.6163	66.7793	77.9695	225.589	552.975	172.412	24.0496	442.839	612.971	307.962	595.57	1010.1	370.828	974.718	1573.25	998.313	510.329	318.918	214.13	413.063	1049.68	582.086	834.784
A0A075B6S2	4224.66	2734.9	3599	1970.55	4150.99	2599.66	3402.56	2131.57	2443.75	6239.82	3042.98	3197.1	2884.99	3767.47	2816.25	3742.2	1348.25	2040.59	2775.25	1464.13	2725.18	8971.05	2899.66	4095.61	4511.5	1962.86	3883.37	9178.6	1528.9	8488.51	4065.75	3592.29	5351.6	4182.33	4913.67	6538.44	6404.13	6150.95	4122.07
A0A075B6S5	82.9637	52.6573	21.0568	15.4845	76.5527	82.7588	61.5362	39.5308	29.2866	33.9164	24.8124	62.2998	66.4948	34.9908	35.7214	27.6019	24.3495	41.6554	30.015	39.6833	54.0584	159.399	29.2272	118.697	122.732	20.8595	80.2969	87.7004	60.8857	103.421	143.994	107.108	75.9033	87.3494	82.6353	101.945	88.1312	52.5711	108.125
A0A075B6S6	22.4064	18.1083	15.7314	15.7314	16.3954	18.0283	13.6529	26.1232	22.8023	18.1083	22.8023	13.4142	10.9778	22.8023	15.7314	22.8023	22.8023	22.8023	18.1083	22.8023	22.881	53.6588	15.7314	29.6929	47.8497	22.8023	18.0844	19.6641	21.453	21.433	25.2869	26.4851	18.9918	23.1613	8.3745	20.1985	32.1439	52.0174	16.8364
A0A075B708	267.859	245.725	82.4502	224.003	375.563	286.136	443.495	387.453	78.2024	334.437	258.332	339.766	289.17	659.502	142.293	281.768	55.9594	177.371	79.9346	79.2188	491.6	465.617	308.602	268.572	412.375	301.908	437.148	886.159	354.326	402.208	344.288	580.81	489.788	398.215	546.112	1147.95	689.891	688.687	386.789
A0A075B7B8	2042.64	848.745	1750.59	495.639	1597.72	774.783	3711.07	964.412	463.2	538.932	563.289	777.354	1127.57	2192.8	869.463	634.866	547.409	400.192	346.189	552.275	3016.03	2470	590.622	1542.68	3659.48	495.209	1854.23	2738.71	1993.12	2245.72	2949.92	1628.35	1793.67	1335.55	2725.39	2231.9	1541.68	3146.76	2093.67
A0A075B7D0	340.873	234.093	349.03	109.945	364.031	368.746	564.748	52.546	246.737	136.153	295.944	283.662	345.845	510.356	13.5605	470.516	205.119	239.398	251.579	270.531	429.322	429.936	302.342	289.713	381.366	302.599	609.982	149.247	313.74	387.424	735.973	431.593	463.987	341.189	728.75	418.529	566.125	509.617	372.838
A0A075B7D8	238.342	190.191	177.804	106.853	303.072	137.601	177.675	86.0579	151.056	84.5285	335.475	155.165	198.901	178.2	197.4	117.086	112.08	64.9082	88.7982	203.203	279.925	233.562	68.7992	196.572	259.831	84.4885	266.227	410.057	51.0676	355.565	262.997	384.744	273.809	124.765	205.328	246.403	355.576	367.631	239.395
A0A087WSX0	97.9256	275.825	196.081	61.8023	72.0974	81.2654	26.4853	132.736	341.299	330.465	317.419	318.648	272.708	63.0624	137.11	155.904	341.25	78.0737	51.4317	185.629	118.268	453.191	58.6875	69.879	91.5102	88.1	68.2652	119.559	122.34	118.521	583.58	70.879	109.097	47.9223	380.702	88.2831	347.003	151.796	180.102
A0A087WSY6	429.643	182.916	303.454	195.774	305.846	181.353	723.29	289.449	152.867	119.113	182.158	296.261	293.189	269.403	188.554	161.539	121.216	108.125	120.463	120.192	443.109	647.561	131.553	307.59	495.217	182.572	422.239	546.846	451.866	359.729	629.853	623.625	488.687	306.908	431.313	474.168	540.871	662.835	535.824
A0A087WW87;P01614	25.722	3.33696	7.18884	3.53902	4.26026	4.92423	6.67823	4.86818	3.37624	3.96235	3.66971	2.00575	3.92349	3.98837	6.83933	1.75263	6.1163	4.4988	4.51656	3.98837	10.3319	4.91014	3.41027	5.09798	6.46197	3.98465	2.68319	6.1638	4.39562	5.54905	7.93117	5.58932	3.56277	4.95598	4.18666	5.70011	5.61844	5.89522	2.45141
A0A0A0MRZ8;P04433	3333.78	2177.75	1762.51	1266.13	3054.52	2663.67	3771.09	3423.29	2070.41	1488.97	2566.53	2790.2	2276.96	3331.34	2501.95	2224.5	1907.62	1848.94	1945.4	1396.41	4734.07	4494.57	1125.18	4855.43	4371.03	1278.23	4300.96	5289.27	859.038	3958.98	5724.15	5722.02	2117.41	2725.21	3604	5330.67	6135.29	4352.45	5108.82
A0A0A0MS14	166.782	193.7	32.68	51.1487	431.506	38.6487	441.213	50.194	104.712	22.7503	264.435	565.928	775.715	211.072	130.095	76.6924	46.4706	62.2562	106.451	27.7979	303.575	107.677	191.06	428.8	698.832	20.2404	593.665	364.495	310.122	152.729	703.135	488.512	223.183	82.8985	1419.05	1008.97	1191.26	346.756	202.269
A0A0A0MS15	437.215	252.5	232.174	263.888	433.31	414.887	264.821	245.08	383.359	486.876	238.787	229.399	362.511	331.862	228.445	534.992	237.44	209.979	199.61	288.455	503.465	545.842	119.171	485.762	487.267	269.886	410.485	782.338	342.56	599.545	619.03	404.849	585.947	470.942	110.337	313.804	296.057	1500.56	534.649
A0A0A0MT36;A0A0C4DH26	31.9822	58.7207	81.6466	9.51226	100.261	64.4265	61.2903	102.992	48.7205	41.7718	57.3574	110.332	86.0184	152.022	139.41	110.008	88.2131	42.5179	167.811	54.6468	27.9561	260.635	88.5151	209.27	248.336	10.6216	51.4368	424.786	128.237	170.716	32.7424	125.833	38.6465	122.565	139.571	301.767	87.3033	76.0749	31.0832
A0A0B4J1U3	141.848	149.963	42.4167	66.1786	162.964	94.4725	47.338	114.695	37.1896	73.4566	126.847	114.31	112.458	96.4241	121.029	45.8917	168.627	93.1962	34.8895	34.8018	104.201	141.249	62.2112	57.6591	40.2844	75.1226	84.6093	87.2562	99.3074	111.035	47.7274	79.2182	168.182	16.7937	46.5984	29.8771	28.9661	70.0695	79.2082
A0A0B4J1U7	840.661	483.046	528.505	228.326	634.677	242.224	721.154	559.198	514.215	385.691	1359.29	1122.64	1320.85	592.573	494.818	540.326	686.675	382.216	582.148	576.924	832.502	1061.49	444.12	882.44	1647.01	238.679	889.267	928.703	4169.85	1080.71	1229.85	638.963	694.553	814.366	1029.34	737.114	1305.11	2146.13	1485.32
A0A0B4J1V0	186.592	192.187	327.028	103.22	199.835	78.2117	151.033	121.824	80.5444	128.873	193.174	127.129	204.906	185.673	91.8209	116.475	109.557	34.8316	137.53	292.185	223.259	141.663	33.2802	109.211	226.997	94.0484	180.717	246.849	1252.33	349.311	265.963	83.4036	86.6002	66.9056	202.74	133.276	238.116	211.704	153.746
A0A0B4J1V2	49.1823	24.2067	24.8592	28.096	23.7456	29.5501	23.4813	47.5688	18.9637	30.8853	26.5056	28.3001	30.7016	39.6483	42.1659	34.4325	34.2664	44.5863	33.868	43.501	35.7835	47.7975	27.8166	30.3572	72.0553	33.7113	37.6998	69.9888	35.0554	27.5347	95.3864	76.2993	24.862	20.1057	32.763	23.5936	30.0693	63.0477	64.8018
A0A0B4J1V6	8306.71	4309.64	3438.79	2204	4781.24	3471.44	6792.33	2953.45	2735.5	2438.75	4236.01	4405.2	5321.87	5988.31	2036.84	3031.09	1874.03	1415.4	2289.84	3818.43	8643.79	5371.93	1787.21	5553.28	8654.26	2716.59	8428.43	14105.4	1316.84	12165.5	12521	7487.63	6434.77	4643.46	9373.45	6814.47	9681.75	12241.5	8576.22
A0A0B4J1X5	508.33	261.273	141.624	452.599	448.312	336.483	331.688	291.363	226.92	643.506	144.152	306.48	81.7226	423.311	161.638	529.482	415.855	213.663	400.875	322.586	759.618	436.862	82.9358	588.027	695.557	338.267	415.602	1033.31	368.06	475.174	823.161	1113.59	227.286	422.289	29.17	786.514	612.638	1431.99	628.028
A0A0B4J1X8	791.937	333.564	153.802	171.081	773.709	217.362	1161.83	308.373	134.224	194.258	156.485	661.214	587.402	312.734	187.155	417.159	246.001	196.613	450.422	98.8123	956.32	939.32	117.597	928.417	882.513	145.248	843.251	1020.65	983.246	959.463	1509.75	1108.05	861.225	876.039	1222.15	997.987	1485.82	1427.75	1510.77
A0A0B4J1Y8	397.492	63.4651	144.758	274.138	231.18	278.418	228.035	46.6687	168.331	707.91	149.466	365.71	238.724	162.569	90.4663	241.02	291.804	162.59	141.052	188.38	266.683	205.81	274.696	64.2852	247.431	45.8995	189.623	563.874	383.587	180.194	281.583	338.436	202.297	121.65	28.9885	109.517	130.731	343.809	72.3984
A0A0B4J1Y9	122.445	31.8204	45.462	35.6009	33.5798	34.755	36.4509	39.856	29.3249	26.8893	24.7299	37.3014	41.3009	92.8907	21.3604	20.088	28.243	18.0274	14.8176	48.5916	91.8439	37.4125	17.8682	38.167	104.909	13.4007	240	140.366	111.756	107.7	82.0142	73.9257	23.9997	19.1595	173.306	60.0444	142.569	111.023	131.398
A0A0B4J2B5	3979.12	2744.63	2355.52	1743.61	3553.4	1644.86	4928.2	1732.94	2372.31	1843.22	2140.55	3069.23	3331.15	3061.8	1695.45	2880.94	2602.39	1771.93	1438.12	1740.29	4157.86	4177.69	1905.96	2899.8	3868.58	2710.94	3985.94	6153.12	2015.48	4060.82	5202.42	3859.24	3357.64	3792.99	3465.81	3390.52	5518.39	2365.83	4588.63
A0A0B4J2D9;P0DP09	66.7832	64.9903	71.8419	98.7267	45.5172	96.6095	62.6449	71.463	100.343	62.6625	84.133	83.5044	93.2757	56.9972	79.1351	63.9718	35.3763	73.0197	67.5552	57.9431	101.427	63.1133	55.1781	107.281	101.425	29.0988	15.4016	94.2088	63.6032	39.2237	64.8435	75.8334	55.3335	46.4879	133.442	73.1253	82.9239	69.5696	59.3019
A0A0C4DH24	24.4193	34.1344	34.0074	18.576	46.0474	35.9313	63.5323	26.0426	12.096	30.0598	23.3929	48.9083	26.0088	34.882	34.9739	33.2775	29.175	33.1425	56.9571	33.2775	28.0174	35.4654	32.5093	20.8144	15.4514	33.2775	9.42224	44.9098	34.9541	12.6957	40.6877	38.6033	51.6857	16.7775	80.4246	38.8636	21.6784	25.314	74.5983
A0A0C4DH25	1750.8	1552.56	1191.24	748.299	1569.87	1647.52	1600.65	1836.22	1263.49	1298.05	1829.08	1848.18	1430.81	2225.06	1586	1238.51	1094.37	1449.48	967.715	513.829	2170.62	2683.22	855.997	2443.62	2618.36	1314.55	2080.44	3040.75	1800.84	3003.55	3349.62	2983.38	2281.98	1955.27	2098.68	2968.32	2598.6	4591.83	3418.77
A0A0C4DH29	64.9297	25.4389	25.4102	29.4348	8.11724	25.441	57.7027	18.6866	62.6526	26.6265	70.9015	46.5677	42.1996	204.253	58.9877	56.0237	65.5966	60.7782	59.2029	54.2668	30.9435	91.3751	39.2335	38.4698	82.3248	31.2077	56.1257	72.2213	47.8082	87.8482	89.7175	79.7687	21.4825	31.8523	8.89904	42.5579	77.0936	32.4755	33.3615
A0A0C4DH31	428.931	231.223	147.57	225.383	628.439	159.841	302.81	208.058	121.091	143.963	317.021	273.325	310.285	212.953	96.1303	232.88	192.164	168.78	95.9407	133.578	358.12	405.036	177.047	544.955	643.865	106.362	394.122	445.676	726.27	481.507	560.316	450.274	569.627	325.016	483.362	363.849	440.521	1115.67	426.982
A0A0C4DH32	16.8157	7.19523	11.436	8.83766	40.3681	17.8566	13.2725	10.1422	12.0231	10.8094	10.9578	18.4368	16.2467	12.2658	13.9262	11.5505	11.8418	21.4833	12.8425	12.7967	29.5325	32.4869	13.5297	25.2927	68.9249	12.0231	20.8203	23.837	19.2662	49.3847	47.1611	42.2641	28.9915	47.4092	48.0572	24.329	57.0285	60.9376	38.4528
A0A0C4DH34	223.583	176.174	101.531	109.596	302.477	329.937	306.509	340.474	170.655	497.631	233.48	199.049	238.827	386.904	347.961	137.759	207.813	181.635	194.182	286.998	384.211	149.223	191.996	255.044	650.124	134.848	296.131	460.059	416.646	424.17	418.533	328.568	327.115	297.066	381.137	241.248	284.017	494.509	381.426
A0A0C4DH35	908.208	400.616	638.311	231.674	694.438	214.585	659.686	378.62	212.772	176.569	325.748	545.902	454.605	811.344	213.122	361.247	99.7324	232.481	121.9	381.09	747.478	787.102	147.124	772.136	1267.85	234.447	861.35	2730.14	297.361	761.797	842.711	700.136	499.638	411.419	1434.82	521.866	1288.02	1307.55	1017.28
A0A0C4DH36	6891.63	4676.36	3471.57	2782.26	3978.74	2534.19	7506.69	3478.92	4161.15	3263.65	4796.11	4566.72	5401.25	8681.25	3085.59	3718.73	3081.6	2705.99	3007.41	3976.53	6489.81	4430.24	2159.72	2223.95	7736.19	1890.64	6070.23	10275.8	13033.3	8828.56	6546.91	8959.65	5302.4	2726.1	13080.1	7073.06	7994.17	12203.8	8192.94
A0A0C4DH38	2861.99	1211.05	1190.42	1546	1510.54	2220.79	912.74	1566.19	991.838	88.1692	1441.72	2341.47	1464.59	1964.09	1123.02	1500.92	1371.37	1196.35	1436.2	1500.9	2370.71	4045.92	751.07	2620.51	4606.44	780.84	3218.78	3516.5	1750.23	2830.9	1815.91	1892.93	1362.5	1882.6	695.547	2868.26	2993.29	7920.45	3668.06
A0A0C4DH43	681.329	261.862	536.348	406.142	357.199	1022.92	161.9	445.922	384.775	105.083	436.773	377.751	349.694	1010	13.522	742.596	820.168	418.019	401.163	498.536	321.09	462.883	354.197	536.837	45.267	721.27	1023.35	1134.68	102.284	408.897	61.3861	185.563	353.053	350.522	406.009	284.577	119.138	94.9163	523.409
A0A0C4DH67	46.411	39.3425	38.1743	15.31	16.9984	8.96664	76.3101	13.0236	33.8968	29.7121	38.1031	20.9462	21.1659	78.5449	38.5672	35.5695	31.3447	17.1562	17.589	28.9074	49.1087	68.6574	18.4174	37.6328	89.6266	29.1708	52.4463	120.988	57.5494	37.0723	97.0149	32.6087	54.7238	14.6128	67.0391	33.1704	40.0916	33.9447	43.6407
A0A0C4DH73;P01611	157.131	110.841	44.4587	71.8412	137.142	36.1557	317.244	49.5916	83.4359	43.0699	137.058	139.509	126.965	291.888	45.2126	85.9635	54.0391	90.9326	25.6495	115.506	364.382	162.737	94.6878	149.165	353.121	62.8201	322.858	389.124	200.7	251.092	318.995	294.632	135.927	103.662	276.595	238.652	239.24	28.5536	294.193
A0A0G2JRQ6	463.33	594.168	219.615	252.295	578.622	445.774	1056.59	1089.85	762.781	347.455	442.842	434.259	425.4	354.82	307.1	298.646	191.088	743.961	554.604	161.37	445.05	757.422	487.454	541.752	1458.04	190.933	885.466	1438.21	607.862	548.139	521.097	1104.65	445.726	547.628	464.729	324.801	836.164	1105.01	1389.46
A0A0G2JS06	232.475	360.375	118.035	122.603	219.427	108.02	212.556	183.576	223.808	412.337	386.114	380.324	203.751	129.289	215.107	153.19	254.378	96.9426	44.7279	322.242	324.067	472.768	103.798	105.613	227.852	106.827	167.061	258.54	536.118	446.105	354.51	256.07	159.392	168.881	252.338	153.183	409.373	378.638	334.184
A0A0J9YX35	118.967	156.998	152.964	80.8053	107.269	75.5715	155.451	83.6983	142.307	54.9648	271.451	183.626	196.66	209.619	183.399	107.542	234.799	133.711	79.8513	98.3557	126.138	112.097	95.0628	114.512	219.813	26.4967	70.1862	164.877	145.292	165.687	97.6165	62.8966	113.955	108.235	177.713	113.379	163.195	56.494	119.488
A0A0J9YXX1	192.503	18.2263	70.8232	74.4585	171.23	31.5913	56.7865	220.176	442.013	54.1271	294.077	338.762	55.2541	593.342	194.647	27.7813	315.539	391.549	132.581	230.397	41.8343	180.585	196.935	131.356	23.4561	25.6673	134.813	346.293	200.521	364.364	129.049	44.3949	184.598	246.772	193.539	44.528	160.772	51.5813	5.14419
A0A0J9YY99	2318.71	1815.73	916.736	1160.04	1697.55	1503.69	2414.76	1603.47	1988.13	1469.09	1817.91	1697.11	1281.58	1614.09	1499.71	1558.39	1197.49	1208.93	1089.04	1226.49	2260.5	2290.46	1146.5	1637.22	2145.55	864.143	1775.75	2769.1	3802.18	2797.84	2569.32	2582.33	1388.68	1222.75	1790.93	1638.13	2509.45	3328.41	2129.11
A0M8Q6	374.607	314.394	368.691	220.5	177.843	600.994	387.109	747.308	405.14	368.897	611.561	375.667	654.801	568.034	573.991	974.804	450.801	434.676	1067.59	411.115	110.25	187.932	413.314	400.207	251.751	493.739	140.19	629.633	224.882	338.302	779.506	352.15	405.13	127.617	286.496	539.795	700.021	673.746	184.367
A2NJV5	54.0613	24.9455	78.6461	14.8348	40.029	36.2011	42.2761	23.3917	22.8782	55.5729	36.2481	40.7175	34.7813	29.9971	42.6921	65.9923	35.2784	30.939	55.2584	8.80884	45.9581	116.249	48.25	28.7632	37.0832	16.4831	73.5534	58.9872	42.6684	186.458	72.6405	49.7759	46.0312	27.0569	49.2276	51.3718	68.0335	74.4006	54.413
B9A064	14001.5	16819.2	9017.34	17036.4	17274.2	20077.6	18988.6	14079.7	17601.6	14916.7	10425.1	20070.3	17816.1	17555.4	12922.1	18287.6	16654.3	19205.3	20298.3	10211	21616.2	23995.5	17786.9	22507.5	22335.1	11602.2	13145.6	22896.6	36835	20933.6	24113.7	23969.6	13146.5	17962.6	14133	26587.6	16712.1	29044.1	16360.3
O00151	9.78686	20.1446	12.3883	4.70157	10.0347	29.5135	9.74958	21.9491	27.4235	14.4788	25.2085	17.7331	19.9566	54.0403	30.2664	28.5183	22.4578	18.5977	18.2325	32.0282	19.8281	20.7273	19.6935	16.1032	8.40954	5.1916	20.6818	19.1065	18.7186	18.16	15.1628	14.4235	16.945	20.9926	33.152	14.4235	15.1628	13.8121	11.1133
O00187	140.801	110.441	88.8878	114.469	181.867	106.469	156.883	77.393	60.7159	93.8577	72.3552	81.2472	95.1915	113.174	105.402	85.2635	79.1409	83.1354	110.645	63.4194	92.6887	166.735	123.124	104.797	110.972	80.349	118.458	107.651	116.412	68.0898	118.691	82.4193	129.723	79.1446	69.8165	100.498	116.779	83.7185	141.222
O00391	171.968	136.707	129.906	146.227	171.594	184.118	172.654	162.133	289.244	145.54	144.106	148.437	129	164.139	151.545	162.717	191.376	143.749	166.327	126.173	118.101	189.04	182.938	132.571	188.131	155.553	164.469	180.558	70.9549	170.134	140.577	110.837	136.916	156.455	165.917	162.023	129.894	203.202	176.754
O14786	25.3246	18.7816	16.9295	15.6642	22.1474	28.7574	21.8094	13.0136	21.5117	16.766	8.78906	20.4196	35.9049	8.50292	14.0629	35.0653	9.52444	4.55513	5.507	19.6767	14.9856	3.46125	23.0409	26.743	28.2412	25.59	33.9045	45.0815	21.3525	24.5623	28.808	26.3149	29.7563	20.259	25.0704	27.9334	28.4312	16.8382	4.70092
O14791	1845.2	1807.48	2797.51	1831.74	1028.53	1013.96	1599.38	1495.68	924.959	1430.84	1342.86	1197.78	1338.44	1360.99	1927.09	1818.08	1226.26	2185.25	991.701	1338.67	1563.77	1388.67	1633.47	1453.63	1382.05	1362.66	1550.25	1874.14	1585.79	1256.71	1374.2	1455.1	1457.89	1690.88	1261.53	985.743	1429.25	1931.14	2072.45
O15439	299.218	36.4255	78.4242	46.0626	214.32	65.342	161.734	41.5147	84.6374	36.1746	34.1316	116.842	71.699	48.1595	32.795	40.9046	34.7105	19.4284	41.4391	17.9412	108.618	221.036	16.275	118.044	174.063	20.0865	143.524	151.988	92.8665	348.844	293.707	171.468	270.274	134.915	171.876	96.5096	175.273	370.894	137.432
O43324	47.8962	60.0003	145.011	108.082	71.399	63.9347	70.5142	15.9473	76.521	151.437	54.1064	77.9655	50.1914	89.2064	128.029	43.5505	47.7066	23.4426	59.4708	166.193	91.253	97.0039	32.5557	37.9033	106.393	24.7318	44.3381	73.1774	59.5466	68.2932	69.344	65.46	74.6544	92.7816	82.9471	61.2953	37.651	198.298	49.1475
O43707	1109.52	622.267	640.025	413.841	1092.23	481.003	21.3175	496.271	691.624	856.112	530.436	501.121	657.73	55.6061	658.377	6.6955	549.052	614.002	504.337	855.462	1443.3	501.363	524.371	492.912	2228.97	5370.87	42.2255	6104.37	1135.74	819.646	2161.13	603.74	756.527	749.073	22.693	2107.41	760.781	3616.34	8180.46
O43852	13.8318	10.415	14.3107	8.61207	30.1453	15.8252	24.446	8.53712	9.74899	13.6508	14.9339	12.7511	10.7268	28.9347	15.9564	16.0753	21.2848	21.1915	11.9885	18.6377	16.3132	10.83	13.0893	18.8076	21.6268	15.7585	15.295	16.8178	20.1603	16.8178	15.8228	17.9935	7.19967	15.4898	14.402	15.295	17.638	24.446	16.8178
O43866	3860.24	1470.82	4551.11	1467.64	1964.74	1764.71	2284.63	2050.16	1470.64	1940.33	826.251	2939.73	2437.14	1881.62	2242.15	1134.34	3088.74	1286.69	1812.95	3140.62	1585.5	4394.85	790.146	2110.13	2328.76	2419.58	1588.4	3045.4	2294.42	1819.76	1225.82	1276.03	2538.27	1244.36	2842.37	1207.3	2213.66	3741.83	2122.93
O60762	41.1894	31.876	38.2106	41.7514	37.7758	108.68	32.4074	47.4389	14.4299	41.9815	40.3191	54.4429	36.4236	128.947	39.0435	62.8529	29.3439	37.8939	39.9581	37.6494	36.6822	35.0186	29.9284	53.3453	63.5315	55.1482	42.6271	28.1277	37.0509	61.3091	61.2511	75.8238	47.165	28.7724	46.1579	79.7439	75.7793	63.6993	42.9129
O75015	22.8774	6.65382	4.77458	10.3668	16.121	8.93172	12.0528	24.5697	35.569	65.1212	18.3347	5.74572	3.40224	12.5465	7.87652	29.0274	15.1937	16.4505	15.0876	10.0115	19.816	3.76691	14.766	13.617	18.8297	11.4181	26.3795	18.2121	14.5493	18.4361	18.8761	19.0055	9.11453	14.9982	8.91889	12.663	40.2352	21.5386	13.3463
O75636	830.892	1025.88	939.457	1250.68	628.397	1355.92	1357.26	1048.4	640.623	1572.12	541.56	1035.6	1109.32	761.126	701.859	736.701	913.477	809.608	1590.02	850.319	973.259	1708.49	1659.15	1321.05	764.131	1131.33	885.26	1274.84	727.548	1002.71	993.632	909.886	845.017	929.16	540.619	634.423	1094.97	680.153	1357.59
O75882	484.6	405.813	512.931	515.067	512.403	346.142	404.726	402.777	381.597	478.681	401.546	370.835	455.652	461.297	453.836	413.516	380.947	384.463	453.568	522.315	569.787	272.39	451.55	432.108	541.708	377.059	538.488	582.67	285.226	461.648	456.795	360.246	583.304	567.527	482.058	400.729	590.401	390.213	697.574
O95445	1778.15	1619.85	2151.17	1670.5	645.119	1074.86	1299.92	1750.38	1124.85	1721.58	1654.15	1379.62	1244.05	2044.02	1879.66	1508.48	1761.59	2040.5	1911.94	1538.72	1902.98	1417.27	1816.63	1763.66	1227.43	2048.42	1419.17	1350.46	1306.88	1435.66	1779.56	1497.52	1790.84	1537.26	1483.44	1549.95	1319.55	2092.08	2068.74
O95497	13.6808	64.3862	61.864	49.8014	54.5502	19.2479	13.8808	46.0949	82.3855	39.5765	25.9995	28.4252	37.525	35.4013	70.8546	15.8286	27.809	26.1458	57.4969	67.4987	30.7442	27.3341	46.8137	42.5908	62.5129	14.3544	6.23725	3.47976	41.9115	26.1552	28.8875	36.5667	87.0053	30.9262	28.2783	29.0631	19.541	50.451	29.0631
P00338	23.2662	38.3044	23.0358	25.6681	20.6854	23.2589	22.6064	24.1998	25.4844	24.1875	26.514	14.594	17.0638	24.6403	20.7268	35.8544	20.7519	13.9497	19.6122	37.4298	24.9585	71.6856	23.1368	36.6456	29.4142	42.13	23.3169	19.5629	39.1454	27.6313	19.9597	34.2118	21.2332	25.6577	24.7652	17.0627	19.4819	58.9381	19.7292
P00390	13.046	8.30723	12.7748	14.8258	15.9084	11.4688	24.4923	8.33084	18.0787	14.5774	11.0417	11.1834	11.3309	9.9203	11.9197	27.0288	13.6665	14.8857	17.9191	11.502	14.5711	67.8505	14.6261	7.00224	24.2597	21.6401	25.3618	13.0288	14.6328	15.7584	21.0626	11.484	20.3367	29.8194	7.38218	29.9346	10.2759	50.0995	14.8206
P00450	7857.25	7710.52	13412.4	9236.82	12268.4	9749.19	7976.34	10846.1	14320.3	8448.89	12384.5	10589.1	10647.9	10299.5	9122.57	9980.13	12299.8	10856.4	10815.3	8460.56	8952.48	6937.64	9529.19	8490.44	4288.64	10711.5	9611.83	8585.42	4388.4	8858.15	10463	9577.4	8538.11	8949.52	8417.18	7943.33	8008.18	7381.32	8287.29
P00488	27.4155	18.2974	21.6203	25.5599	14.6636	26.009	19.9038	39.8238	28.3408	33.2371	23.9434	30.7069	26.6331	50.8939	23.62	24.947	20.0996	18.575	21.5913	34.5871	15.0601	38.799	27.8749	21.4278	23.0244	14.7521	17.4703	32.6278	69.4063	14.6476	19.0766	16.4713	11.8665	17.122	16.3792	18.2381	14.91	75.8885	21.309
P00558	3.66538	5.03207	3.72044	3.47345	3.19202	12.0571	1.36122	0.868123	4.26943	4.9151	3.18201	1.95928	4.63006	2.90826	3.47345	5.11975	9.35667	4.88251	4.65009	7.72804	1.91187	2.28883	3.39112	6.5907	3.81659	9.09244	5.15368	5.15368	3.8716	5.15368	4.67458	2.23613	10.4264	2.76004	5.15395	5.15361	1.96206	1.14233	5.15361
P00734	3902.94	3887.48	4695.84	5215.85	3528.09	3818.87	3332.9	4453.96	4189.86	4826.39	3701.55	3882.93	4176.35	4048.1	4704.22	4568.73	5564.69	4251.73	5438.34	3817.68	4701.27	3440.85	5149.05	4013.76	3597.49	4319.96	3499.93	4124.96	4560.95	4119.21	3708.41	4451.8	4397.74	5717.24	4087.3	3790.7	3920.22	3270.91	5420.38
P00736	1146.3	1388.04	1693.24	1398.39	1246.71	1473.43	1456.76	1406.19	1423.56	1642.85	1571.45	1057.79	1098.74	1228.93	1306.19	1361.11	1523.61	1507.82	1345.24	1230.08	1320.81	1450.97	1405.04	772.791	1185.91	1410.29	1282.54	1173.79	838.419	1297.52	1259.98	1077.62	1413.5	1308.19	1389.19	1157.49	1307.55	1018.08	1119.94
P00738	84857.2	44606.8	92865.6	77022.9	98136.3	83133.4	62332.8	53066.5	16995.1	49208.4	34407.4	86763.4	84203.6	29293.8	61746.3	25120.6	43582.7	43214	78646.4	24251.6	44911.5	43412	59517.8	81680.4	35143.6	44837.4	60014.1	63710.3	51612.9	108600	98077.4	62765.1	103489	24127.1	71661.4	76062.1	47815.7	58277	59166
P00739	1399.38	1212.26	2133.43	919.91	554.178	342.065	925.444	1281.38	224.412	859.879	1040.82	838.247	988.238	664.134	907.019	1188.35	566.657	1625.44	930.198	555.642	680.43	782.433	799.462	615.805	529.415	667.23	1123.65	1215.31	398.21	685.722	1236.69	589.879	656.43	609.264	851.478	712.213	762.915	1000.84	1075.78
P00740	354.183	354.423	421.64	466.447	308.397	421.77	404.065	394.308	320.282	420.465	395.571	331.442	366.718	301.376	372.878	381.744	331.882	420.969	364.009	361.35	264.628	288.55	448.749	433.634	352.77	264.503	403.206	344.043	291.607	282.989	270.097	282.677	412.075	382.856	347.362	270.305	320.341	291.928	449.147
P00742	300.535	275.073	430.497	400.816	220.39	237.745	255.978	250.943	238.701	257.181	318.877	276.101	255.109	258.952	343.788	208.874	296.703	369.916	326.919	383.972	264.95	226.306	350.577	301.31	303.242	246.084	220.06	329.971	422.397	281.969	226.152	306.225	283.721	289.385	257.767	245.907	296.313	131.993	412.12
P00746	67.8942	84.3962	61.3668	54.5114	75.0115	53.6867	112.614	56.9025	80.0256	39.4156	49.5315	56.3616	54.1675	75.3905	63.1994	61.0984	54.6709	55.6664	66.2818	62.2987	44.1037	64.7725	43.6674	65.2546	114.62	53.5733	68.4185	47.3474	66.5107	67.7491	68.8577	54.1184	74.7225	63.6561	62.2433	81.5094	65.1488	49.4283	38.9672
P00747	6937.92	8579.86	9777.61	9610.63	6025.4	7726.94	7076.11	9474.68	7566.23	8654.93	6754.64	7772.5	8015.5	7360.92	7928.18	8119.39	8646.65	9149.55	7751.36	7607.4	8314.88	5606.67	8264.72	6659.84	5921.55	7112.41	6091.88	7104.18	4146.74	6715.36	5720.11	7328.95	7516.24	8456.47	6489.33	6107.17	6514.43	5810.35	8562.81
P00748	702.963	910.981	1119.39	1178.97	938.538	983.345	456.608	495.197	388.226	459.974	720.925	418.892	434.651	431.004	926.75	867.609	943.729	751.851	507.564	482.209	867.565	431.141	546.462	660.452	690.532	933.907	630.645	852.455	388.471	1122.82	390.914	778.832	436.414	1043.03	772.765	1167.81	712.38	328.115	1110.62
P00751	6862.83	7715.32	10905.7	8145.92	12670.9	8323.66	6781.7	9264.81	10379.9	7990.26	8256.08	8653.89	8732.94	6403.01	7549.75	7992.52	9185.63	10041	8238.49	5644.95	6886.73	4700.87	7451.52	7898.02	6042.56	8581.77	6702.29	7438.75	6248.52	5621.75	7091.98	5172.3	6781.1	8002.75	5813.33	5607.9	5622.76	5724	7360.67
P00915	51.3736	118.598	64.2846	36.2737	49.0018	220.014	101.134	49.101	53.5971	119.944	28.576	51.7124	71.1979	136.323	56.2655	79.1796	61.4994	32.4043	69.337	82.5462	94.8596	632.464	97.6858	37.6039	146.652	47.1644	50.9565	34.6999	196.897	46.082	175.742	93.2985	247.758	116.282	71.3605	85.5528	184.287	80.3399	117.951
P00918	7.82757	30.8014	26.4485	24.1064	25.0439	56.3839	57.5221	28.8706	12.9909	37.1597	14.834	16.9299	22.2	35.7608	11.9919	42.4795	27.2491	15.123	21.2709	22.6742	28.3113	211.104	45.5054	18.0924	19.1373	18.2021	38.1553	27.9747	27.4321	49.8782	69.099	37.5937	100.273	44.9621	18.5464	40.8677	72.9046	44.8879	46.5608
P01008	4525.68	2925.22	5154.78	3978.01	4515.32	6656.88	3823.38	4639.47	6282.66	4053.01	4406.2	5041.06	5408.66	4518.22	4686.19	3939.97	3954.84	3439.2	5430.51	4637.14	4965.96	5687.15	4313.41	4171.61	3638.63	5203.05	5058.2	3999.76	5412.03	4701.93	5993.56	4727.54	3543.45	5175.97	4933.97	4762.58	4960.49	5649.31	5014.57
P01009	16598.7	21740.5	27615.5	20897.2	33426.3	22775.7	17866.6	22870.5	36803.2	26410.4	25813.5	28152	28331.8	22053.1	23146.9	18630.4	24162.6	25345.6	25169.7	19092.3	15909.9	22054.5	24482.4	18465.8	20269.3	25831.8	23746.8	19825	32536.3	25429.3	21144.4	18705.5	17328.3	23293.7	26517.9	24524.1	20504.6	26593.4	15039.5
P01011	11648.1	14027.7	19021.4	14684.8	28521.6	24524.6	10425.3	15821	15362.3	14362.2	14031	14679.1	15518.1	14372.2	13631.4	12865.2	19001.7	15854.5	19723.7	12606.3	12746.7	15510.5	14619.9	15822.3	11148.7	11236.4	14396.8	12193.8	14454	12355.8	12478.4	12347.8	12128.4	7235.52	13476.1	13608.5	11349	10284.3	12156.7
P01019	994.645	739.504	889.951	1186.72	819.45	1190.9	724.12	907.015	748.455	1155.51	490.778	696.848	692.407	1058.2	1032.88	1024.44	685.528	660.56	1027.08	848.54	1102.1	1083.43	815.073	950.666	803.566	623.518	1061.93	981.082	151.38	1068.04	1011.55	1039.32	909.87	1883.1	857.187	990.985	1067.27	827.374	1371.39
P01023	42238.4	39537	46142.5	33783.6	62139.3	103222	35993.3	60432	50553.4	46872.9	56094.6	56107.9	50837.4	104195	36006.9	44858.1	67215.2	41969.8	58411.8	57133	66625.4	69049.6	46558.1	55724.4	67522.5	63174.7	47654	37225.6	34228.2	66548.1	49713.6	54438.9	42564.2	51138.6	48576.9	65785.9	74494.4	58842.5	36127.5
P01024	30843.6	30880.3	39971.4	28270.7	40273.1	37512.3	30933.4	35386	41951.8	42885.6	35030.8	35957.3	35721.4	28461.5	33616.4	28639.7	28962.3	39047.4	34513.6	32264.8	34143.8	29911.1	32436.4	34781	30042.4	30025.8	28425	34824.1	23526.8	34180.5	28661.1	35157.7	34547.9	34759.6	30840.9	30033.7	35067.3	24878.5	40567.4
P01031	2357.82	3181.33	3604.95	3459.84	3215.2	3759.42	2763.26	3487.93	3492.51	3564.54	2465.43	2172.22	2196.77	2772.76	2600.52	3085.02	3159.85	3914.15	3004.08	2905.86	2790.17	2177.85	3200.82	3179.45	2447.23	3166.25	2811.02	2490.39	2884.4	2948.13	3259.7	3142.82	2788.43	3192.14	2662.35	2406.61	2507.42	2198.49	3130.55
P01033	27.5821	23.8674	35.6618	36.0561	78.4886	38.9744	34.5092	22.8862	43.3967	29.9784	41.0795	38.5533	43.5487	30.1176	25.2658	33.3697	40.6005	31.1467	39.0418	26.3952	22.4639	45.3588	26.3206	40.3282	46.8294	34.9305	31.9622	35.4834	36.8452	23.1807	14.2208	30.4217	34.1212	28.3777	32.6117	17.309	23.9026	65.4118	36.8099
P01034	64.4348	117.974	115.726	81.059	50.5062	60.7056	81.557	84.3136	83.8639	50.5168	107.881	54.5759	50.2705	86.6146	83.4844	81.2733	71.5752	77.2305	91.7386	116.403	36.1864	43.2024	64.27	34.1313	115.741	76.093	48.7182	35.9459	70.1698	38.6846	30.3235	34.515	44.5254	42.8711	5.09392	61.7098	79.026	41.5547	40.2338
P01042	13366.8	11444	11812.7	11908.5	14488.8	13016.4	10699.7	11785.5	12581.8	9509.03	10275.1	9680.9	9498.56	9136.54	11807.2	9780.29	10068.9	10298.8	11559.1	9566.63	9641.86	10859	10483.1	8428.44	9187.49	9965.93	9569.7	9361.11	6548.24	9758.16	9545.31	9099.12	10753.5	11270.8	8483.32	8785.31	11465	9089.75	11954.9
P01344	161.683	120.958	124.358	176.406	73.2596	79.5699	173.379	146.306	160.384	139.112	141.689	124.896	76.507	162.842	153.699	175.367	162.494	171.175	202.094	149.201	174.479	152.297	85.7052	123.543	94.4237	131.018	194.833	175.587	141.383	177.766	91.5257	139.15	160.354	125.785	140.533	129.515	117.185	154.196	234.257
P01591	5609.6	5742.05	8555.75	3286.98	4944.97	6115.53	5904.21	6674.05	4696.23	6967.37	2836.05	5188.31	4516.01	4330.05	6232.36	3532.58	7041.22	3273.17	8508.3	6997.6	5678.08	7756.19	2490.63	4621.52	5220.22	4308.49	3089.7	4385.29	10829	4453.38	3906.82	2234.8	5475.45	3718.81	5597.77	6365.48	6527.98	7066.67	3905.04
P01593;P01594	276.005	253.715	158.325	203.058	331.268	58.2107	400.164	216.44	257.638	117.553	306.075	418.615	393.249	253.968	108.896	97.8148	190.516	175.049	145.618	192.019	436.475	528.058	183.939	526.593	427.989	295.581	505.609	745.497	90.4835	334.572	443.593	399.026	384.387	198.696	421.506	326.349	452.563	13.6944	295.979
P01597;P04432	76.6179	36.2241	24.4547	17.9132	66.488	31.1987	93.9442	11.2291	21.6141	60.7808	37.0414	64.0343	62.7488	38.8224	13.9954	38.8475	32.5266	31.5392	17.5176	32.3272	150.808	81.3564	42.2483	119.517	116.899	16.4594	127.547	242.205	81.075	82.1738	196.319	123.546	83.9197	108.374	197.855	132.559	124.531	69.1481	112.817
P01599	281.334	286.31	178.373	133.849	212.107	97.2078	192.865	123.242	115.73	178.597	212.664	158.668	82.3958	350.163	149.007	63.5725	137.506	72.3741	133.519	129.088	310.404	85.5651	28.872	153.766	208.046	147.279	229.09	259.91	179.697	231.113	308.737	279.786	167.26	100.49	153.612	186.527	178.657	332.091	238.434
P01601	54.0871	60.5259	28.785	24.857	97.4158	45.4627	102.001	29.5235	45.9396	50.9876	79.1497	95.3135	78.2285	39.1195	21.7581	43.4517	55.0708	46.8158	44.2613	21.5983	128.971	102.368	51.9717	75.0106	158.055	63.5307	70.0002	137.592	74.2241	90.0535	106.981	178.497	93.9037	37.2515	103.659	71.2903	224.81	85.7585	104.305
P01602	1760.46	908.136	698.979	524.771	1101.13	450.955	1800.08	1045.95	857.267	540.91	727.282	1593.53	1669.59	1501.48	1080.82	870.892	940.909	604.705	388.192	594.616	1951.76	2322.66	727.358	1472.37	2623.63	500.439	2122.9	2408.48	5731.72	1333.42	3892.15	2408.15	1838.37	943.696	2150.67	1678.9	2835.28	2570.11	2312.88
P01619	2078.31	1587.02	1214.46	848.592	1848.38	1549.98	2776.59	1171.56	981.007	984.115	1703.46	1703.95	2267.61	2761.43	1661.01	1649.2	1363.91	1506.07	1000.63	1142.72	2427.42	2945.65	1129.35	2648.7	3220.43	1155.29	2545.19	4705.27	1500.74	3456.08	3997.39	4143.19	2361.2	1937.39	3391.07	3046.11	4557.29	4485.45	3221.49
P01624	12509.3	7878.86	7878.01	5681.44	9414.42	9482.54	16732.4	9787.5	6790.97	8185.74	6026.17	13254.2	9222.49	7516.83	7962.73	8417.3	5076.69	6304.53	4246.54	4429.25	16446.6	17495.3	6442.6	13720.8	14473.2	4810.23	12283.2	21847.9	1872.92	15097.2	19297.4	24603.1	14738.7	13915.9	8002.04	12699	17882.8	28920.2	16004.3
P01700	1863.19	2246.93	1876.03	935.654	1310.85	1211.45	2501.76	1683.34	1435.01	1848.2	2668.33	2214.41	2743.13	2012.78	1289.54	2156.34	1544.86	1493.43	2046.53	1809.52	2267.51	2325.46	1107.95	1567.84	1553.38	930.825	1869.06	3012.49	1782.28	2358.59	2447.9	1622.54	1381.98	1548.88	2399.39	1591.63	2537.64	2973.87	2093.18
P01701	1803.7	3839.76	1626.45	1439.14	1381.36	3018.71	2834.63	3210.32	3207.32	2431.11	2081.29	2263.24	2394.23	3125.7	1510.89	2893.53	1542.35	2125.02	3174.33	1906.6	1327.21	3233.41	1071.12	2727.9	2569.93	1086.21	606.223	3444.69	1070	2161.92	3950	2432.01	1847.65	1581.9	3351.64	2031.11	2976.07	5781.19	2464.44
P01703	310.477	309.312	430.182	136.449	211.914	272.92	307.705	282.063	365.464	284.412	366.663	140.525	204.998	309.09	387.271	576.222	329.271	207.168	141.489	474.716	203.174	433.488	81.002	281.105	817.799	207.898	294.241	414.199	286.058	447.398	837.774	341.265	329.106	221.009	71.1312	316.4	486.008	627.079	562.038
P01704	87.8962	77.4683	93.2764	84.8901	170.515	97.4501	79.7838	57.231	101.523	129.58	102.101	77.2874	116.605	142.817	77.6707	91.2716	172.568	92.9023	73.7136	72.7817	280.676	21.0155	47.5687	34.2892	224.807	33.4196	10.7849	88.5731	78.0507	17.0725	84.0736	112.871	132.375	116.909	239.134	337.836	120.241	113.188	73.1871
P01705	48.9038	132.889	63.5203	72.4015	16.8376	54.6104	37.7256	50.9641	53.8048	67.2481	66.0393	51.1384	37.1104	69.9331	68.0804	77.223	38.6787	70.3106	73.0616	47.8309	53.6402	47.5466	70.0866	68.77	154.058	69.9331	2.61183	6.74826	48.9826	48.0548	9.22231	36.562	37.0242	49.4893	91.8751	39.8425	26.8863	48.0816	62.2091
P01706	886.08	1797.39	685.372	894.86	380.931	457.494	1047.27	1409.25	1040.92	676.093	910.831	648.081	745.771	1982.57	422.371	647.361	582.797	771.514	473.963	888.66	661.149	1039.56	784.754	799.636	833.883	700.326	1161.43	1442.79	641.432	1396.03	2484.19	723.449	593.879	766.196	1140.93	940.051	1201.27	1894.12	1258.11
P01714	385.646	266.891	149.297	293.008	424.551	349.215	612.078	380.095	485.944	245.983	351.904	512.553	472.189	376.613	282.407	902.084	493.443	490.689	321.012	374.5	630.464	346.901	261.518	644.93	770.143	338.857	549.437	809.289	693.825	526.479	1249.91	501.14	582.949	493.483	536.526	570.886	673.491	1047.09	509.75
P01715	107.786	43.1074	54.4248	56.8414	60.2864	52.7956	44.6127	87.2975	48.0793	64.9384	79.8561	91.6674	110.365	73.0576	47.8623	147.935	118.798	43.5873	42.8113	96.0706	68.381	80.905	29.2276	135.335	308.333	39.2771	118.387	133.685	73.5947	107.739	198.937	118.812	119.16	67.6314	44.4285	155.685	120.193	188.885	180.776
P01717	1135.72	719.397	400.517	701.793	953.957	1050.84	785.719	735.118	444.388	926.646	719.559	947.899	994.17	1037.37	906.636	1193.51	728.35	1048.98	730.98	668.125	793.508	1069.22	807.063	1081.14	1875.97	564.917	532.603	1782.49	1354.09	1384.2	1450.35	1312.05	1127.46	1107.08	979.934	814.69	1379.76	1862.63	1455
P01718	514.932	32.1391	46.2254	34.2997	105.479	43.0971	298.121	95.3067	39.6618	43.3345	47.0801	482.326	598.847	49.332	78.4672	57.0763	49.7661	64.2043	28.9022	67.6262	171.372	207.902	36.8286	303.091	352.942	35.5825	89.1515	377.86	382.347	256.589	527.709	324.607	154.994	413.334	107.794	193.145	118.858	423.804	107.145
P01721	24.8541	7.82584	34.5873	21.3984	30.6986	19.2526	26.1368	31.6962	34.9714	32.7972	40.0452	32.8371	40.6427	28.5974	25.3817	89.6219	17.1714	35.3261	12.4209	44.8185	20.9372	18.8179	22.0444	44.7088	6.59074	13.0955	6.49949	57.955	29.6622	42.2796	32.658	31.0616	52.145	18.5934	103.391	33.9609	18.4605	105.963	22.9481
P01742	802.737	452.209	735.162	530.302	458.872	486.16	1266.39	348.246	410.147	685.971	378.732	556.503	672.807	702.869	350.71	819.838	358.504	401.42	432.101	215.247	678.428	535.093	474.343	511.36	1011.47	286.384	1473.34	1596.07	34.5312	1046.48	986.407	1213.08	596.936	720.364	1716.88	1880.78	1029.65	2417.41	1139.1
P01743	17.1877	54.3029	16.979	13.3673	30.0468	34.3457	23.2981	20.2251	8.29082	38.6477	49.2639	52.9839	63.7765	29.5997	29.2811	35.0459	44.5418	50.2921	20.4725	5.43615	9.89279	21.6438	29.3682	38.5935	63.2025	34.6236	21.8157	15.0477	34.131	17.1474	29.4089	15.9459	17.4068	24.0868	19.0237	22.0374	16.9287	23.1949	19.2618
P01766	236.791	92.9883	49.7494	77.7912	228.499	95.9719	371.505	143.441	93.0856	116.987	145.819	253.942	226.104	57.2035	169.668	152.311	187.414	75.298	100.051	128.015	388.506	496.725	61.7371	325.096	421.007	95.1962	466.346	503.163	836.873	600.141	752.709	329.204	702.603	420.476	527.6	502.353	839.738	564.576	584.132
P01780	4989.87	4879.74	3399.53	2067.08	4897.3	3675.8	4464.46	3922.83	3536.57	3218.93	4694.62	3920.59	4185.12	5050.74	3016.31	3815.63	3125.15	3061.26	3562.62	2284.22	6320.33	4918.81	2537.9	3397.01	5504.35	2292.65	4256.19	7510.8	6252.22	6407.52	8452.21	6138.38	4132.96	4517.02	6169.28	4828.12	8128.35	9651.13	6445.56
P01782	755.687	159.717	111.102	158.486	456.266	172.016	850.063	293.55	122.645	138.075	117.716	480.463	359.2	229.701	148.478	273.314	176.053	133.721	320.651	99.0422	663.12	563.941	81.8166	474.24	687.004	123.64	701.293	1054.57	974.571	649.255	922.339	642.758	704.916	619.89	1160.19	658.087	995.311	597.646	1541.01
P01817	627.637	278.34	164.002	235.192	381.603	394.924	120.103	422.444	152.104	236.691	657.114	391.649	393.721	87.3464	196.621	379.986	173.103	542.13	231.407	130.44	460.129	653.58	296.493	809.685	423.816	106.712	401.066	974.278	194.335	550.733	1078.51	739.196	622.484	399.355	784.753	363.83	655.242	1411.66	801.832
P01833	158.598	15.9934	35.1405	17.9403	192.827	25.4595	10.3721	23.3871	17.7619	18.9371	28.3694	18.0677	17.9743	21.5633	16.8608	9.32775	24.4606	16.5158	29.5407	26.7094	17.0093	29.3235	20.5409	20.4725	42.9132	36.3858	17.2852	31.9148	18.2273	24.9881	14.6139	40.1494	30.9456	17.0306	20.6654	19.4012	33.406	60.8208	30.6834
P01834	32872.9	15990.4	10880.8	12145	18269.8	21045.5	41361.1	19144.3	19045.5	24731.7	12102.2	22996.7	26886.9	21549.5	13450.6	16150.6	8201.95	13413.1	10944	9992.11	36131.7	24164.7	15136.3	22714.1	31388	14372.4	31533.2	40212.7	2964.76	37251.6	46707.1	41252.2	34156.7	35753.8	33675.6	24930.2	47212.4	53872.9	46140.9
P01857	56550	23484.4	20361.8	20446.8	35949.9	36807.3	52258	40604.8	37956.5	57578.5	27329.8	49813.4	48483.1	40095.1	27765.5	42386.9	34553.4	31783	31148	24351.3	44771.1	59269.4	29473.6	44257.9	54429.1	29819.4	45067.7	59542.7	3399.14	44580.3	64449.5	68630.8	37716	46012.3	57990.3	56721.4	48101.1	79800.9	47733.2
P01859	7571.64	20281.6	9165.76	11275.8	12649.9	20251.2	12137.5	16056.4	14225	17099.8	9328.5	7513.76	7852.15	18524.8	12866.4	13492.5	11935.8	11616	9267.76	3120.16	13036.4	14773	10993.4	8099.72	9554.02	10248.7	9418.03	9446.4	4111.87	12974	15368	14425.5	10149.3	9260.35	10821.6	10883.7	14743.9	15460.5	10807.3
P01860	55516.6	33102.6	29919.1	51354.5	35364.1	73585.5	51115.9	65152.9	59837	77568.4	57331.2	58629.8	56841.4	43362	37948.4	55504.9	26815.7	30014.5	41190.2	36773.6	68351.5	54378	47734.2	44971.3	38015.5	41823.3	38797.7	36334.9	17215.3	58454.6	56737	61016.6	45765.5	43460.8	54218.9	42763.3	45411.3	74565.3	35409.2
P01861	14038.5	5293.34	5499.36	7370.4	12103.6	16742.1	14108.5	10922.3	9527.1	5326.69	8130	5934.66	5895.39	3723.48	4973	3134.18	3513.71	8511.78	4790.44	4562.09	13554.1	6822.75	14269.3	8879.44	32571.8	5735.92	21272.4	35202.4	11935.7	17969.6	23145.6	26971.6	18886.3	11943.5	11924	45077.9	12173.7	8140.67	10458
P01871	50302.9	18786.6	60706.5	17261.2	24386.6	20508.8	28997.7	23365.7	22007.6	34995.5	11364.8	37054.8	33992.8	22684.6	29775.9	20133.4	41499	18928.1	24272.4	42000.9	22804.9	48669.4	11399.5	27184.7	27524.4	37860.5	19875	41920.4	14718.1	27238.2	20489.4	21712	35889	20237	37397.8	15522.1	34515.4	57288.3	27744.3
P01876	14731	21062.6	14329.9	26694	21369.8	23804.8	17524.1	24669.2	24695.8	16281.5	35952.3	24154.8	21043.2	20162	26774.6	19823.7	13285.6	28496.2	19108.7	26755.3	34688.7	14754.3	28433.5	35431.9	36099.5	11209.1	20888.3	40358.4	19195	29089.9	33714.8	23472.8	31757.7	25880.3	23431.5	63824.3	21841.9	41769.8	34449.8
P01877	47262.7	58524.2	36172	23564.1	62418.3	68389.2	72742.7	49145.5	36944.6	42319.9	64249.6	48367.6	48472.4	26902.3	49647.3	22906.8	16707.5	46197.7	21756.3	34553.8	78176.2	45377.3	40854.3	88244.9	157196	20146.8	77448.6	90062.4	95359.8	123940	93477.6	79619.6	75648	48721	66806.6	73596.3	90323.3	153710	84379.9
P01880	80.6395	4.18742	374.204	221.923	591.923	117.02	157.285	195.448	713.139	30.8032	49.0575	49.1442	41.1263	112.406	403.921	139.146	228.504	665.762	152.145	96.1248	158.066	792.248	340.536	124.705	145.794	42.9877	49.3676	102.023	249.73	92.1468	162.584	105.974	132.654	87.1175	42.7761	130.655	336.316	345.307	33.5884
P02042	118.42	451.898	144.812	103.517	254.013	585.198	289.784	121.954	156.366	352.07	178.385	249.763	242.868	448.842	154.526	307.925	206.348	129.113	214.662	417.771	381.688	828.5	365.785	143.27	509.632	256.548	107.19	94.0588	216.802	118.918	447.175	209.958	890.554	409.19	140.778	332.599	656.519	179.016	379.89
P02533	273.067	43.5164	40.2247	245.058	56.8327	1197.4	46.3939	138.492	89.5709	210.578	156.162	99.0138	83.0233	71.0233	443.375	195.236	126.21	44.061	62.7212	15535.8	97.0604	1047.17	94.7247	69.1289	85.152	552.642	580.297	34.5769	156.907	40.2047	74.9819	188.383	253.644	285.398	95.4886	299.651	32.9472	470.901	42.3268
P02538	425.79	42.106	84.4998	410.87	87.5556	1667.95	66.2883	104.132	242.16	328.021	264.531	64.0893	168.245	116.24	787.183	385.799	175.124	59.4989	86.7719	32568.2	167.879	2171.81	161.956	93.2134	160.447	788.942	926.664	39.5546	1147.99	70.5254	110.187	336.99	295.698	415.224	527.607	386.034	23.8194	621.373	31.1974
P02647	100343	120321	112565	135147	53494.5	133512	108791	147675	139209	138762	122306	108384	107297	132654	120144	122477	139906	125863	111117	103749	152418	105061	121392	93329.6	99249.4	159370	109345	104140	73590.4	159013	141507	122428	101334	125496	111687	109476	144630	152778	126554
P02649	11398.4	6805.52	10568.9	7274.42	7156.47	5782.54	10346.8	5457.81	6914.63	8580.96	8958.84	7697.2	8017.69	8536.64	7305.17	7287.33	11962.2	6690.82	11849.7	8014.67	7207.71	8855.07	9721.4	7936.04	7481.49	8923.71	7572.2	6952.02	4685.4	5807.24	4492.91	6324.41	9943.28	4168.74	7154.63	5903.5	8571.08	8087.28	12335.1
P02652	36885.8	23347.8	25513.1	27158.5	8015.66	17813.3	23818	22317.7	27307.8	44146.2	29051.6	26449	26026.6	28464.4	43059.5	25203.8	24786.7	38509.5	16186.7	21617.6	54352.9	35953.3	30120.7	19273.4	30689.2	35085.8	22976.1	21508.7	35154.2	39286.9	25248.9	22520.5	30065	32154.4	20424	27379	25603.8	22414.2	48687.8
P02654	14016.4	10417.3	15269	12036.9	3955.47	7644.83	9787.1	9773.42	8682.56	16147.2	13851.5	7630.26	8354.77	13392.5	12375	9691.72	13418.7	10802.9	13007.3	10179.1	9784.93	8425.03	14817.4	7741.83	11176.2	18624.1	7283.28	8029.2	6948.98	10030.2	9334.34	7675.95	15136.3	9087.49	7070.93	6341.24	14766	9509.93	14860.6
P02655	6389.87	3777.82	8032.53	3433.23	2517.52	2317.98	8465.12	3052.86	2903.84	5223.05	3305.77	3321.66	3678.69	3615.94	6887.17	2583.36	4097.25	3485.37	6693.04	6255.05	3064.3	3110.11	5548.77	4884.38	4229.37	5053.41	2671.28	3786.29	4063.21	3352.23	3154.49	3744.48	7157.6	3881.12	3427.3	1443.33	9092.64	3942.47	10895
P02656	2075.61	2020.72	3242.8	1834.04	729.768	1600.59	2864.24	1455.51	1417.08	2430.77	1119.19	1525.82	1621.12	1428.45	2289.24	1967.15	1950.13	1513.44	2474.07	2764.84	1883.78	1704.21	2277.41	1940.02	1662.14	1792.27	1886.5	1420.62	52.9356	1441.99	1421.85	1941.14	2196.87	1344.54	1333.43	878.254	2485.23	1990.26	3434.65
P02671	1410.71	1914.21	1628.72	1747.98	1901.5	1569.24	1574.66	2317.27	1930.12	1858.79	2090.64	1586.04	1774.1	1656.94	1826.1	2233.46	2070.79	2450.59	1884.7	1215.4	1643.95	1891.97	1686.83	1925.2	2313.8	2513	1980.65	1454.6	2190.37	2201.58	3604.57	1771.18	2324.73	2456.92	3927	5084.98	3180.04	1516.65	1490.65
P02675	10.5947	14.3433	5.25269	14.6946	28.9271	31.5746	10.0879	17.4825	32.848	18.0501	12.9557	17.3742	14.8987	11.51	10.0314	23.5603	11.6908	12.0874	9.15453	13.267	11.1771	17.6365	20.0384	24.8267	13.4203	25.0278	25.4666	16.3276	17.5092	9.10592	25.0339	17.4714	10.6111	11.0613	19.843	33.5065	20.3446	29.6911	10.354
P02679	11.6543	19.5963	16.9329	20.6565	40.7142	43.1838	12.0994	24.9817	53.7339	26.8478	21.5007	19.9824	31.2162	21.9554	12.8397	37.8206	17.6329	15.6326	15.9545	23.393	21.2183	16.0459	30.4215	37.0292	16.468	39.0199	30.3999	25.4616	24.5695	14.8491	45.6353	23.5453	15.0144	11.3453	40.0212	51.5077	32.4905	41.9038	11.6539
P02741	19.9832	27.5448	97.2774	25.7864	1945.28	565.657	126.746	83.9701	115.871	343.234	96.5373	67.2578	37.5003	20.342	53.6453	95.7258	40.0128	459.542	18.851	17.211	31.7693	20.0877	15.0189	1737.91	46.5497	135.296	65.1006	55.3878	458.272	31.6294	126.112	25.0456	52.8329	23.7892	7.74612	19.6921	16.0186	55.7736	33.3765
P02743	2309.29	1600.15	2224.14	1767.49	1556.02	1144.67	2634.3	680.736	1585.93	2500.47	1235.66	1798.25	1680.53	994.407	1603.87	1755.81	1258.18	2727.97	1835.99	1050.04	1483.55	1201.07	2035.9	2685.21	1899.28	1665.48	1969.44	1992.28	973.843	1651.49	2826.51	2319	1413.53	1930.18	1200.87	1840.05	2052.02	562.987	2255.3
P02745	1603.22	1645.38	2270.97	1608.99	1327.36	1882.74	2260.74	1828.37	1925.64	2221.88	1813.64	1211.9	1294.43	1678.28	1564.46	1878.58	1486.05	1332.31	1444.37	1691.95	1680.67	1824.16	1285.69	766.904	1481.68	1918.52	1500.79	1209.47	584.365	1775.9	1720.11	1565.21	1655.13	1668.47	1638.65	1498.84	1856.26	1863.7	1459.85
P02746	3030.09	4078.3	4239.81	3878.9	2963.81	3910.29	3706.53	4165.31	4066.87	4241.3	3851.62	3317.68	3417.56	4150.69	3384.79	3289.51	4148.36	3896.03	3395.5	3252.77	3814.87	4422.35	3769.27	1936.09	3609.23	3017.2	3386.42	2787.74	2126.18	3299.7	2491.97	2201.78	3495.73	3678.68	3219.14	2389.56	3451.07	2688.69	2702.64
P02747	2991.22	3284.14	4196.55	3834.43	3649.74	4023.94	4065.09	3801.85	4249.77	4272.75	3768.88	3309.25	3174.22	4062.04	3398.61	4036.24	3807.63	3171.99	3749.36	3264.45	3990.22	4394.71	3755.97	2144.76	3231.5	3654.17	3546.67	3273.09	521.827	3382.6	2995.09	3012.93	3392.44	3793.07	3036	3190.4	3449.89	4024.57	3047.8
P02748	2168.71	1257.44	2847.28	1847.63	2879.38	4035.41	1951.2	1816.03	3951.4	2405.9	2410	2504.27	2726.34	2253.62	2006.16	2359.52	2680.24	3645.84	2898.22	1653.31	1582.42	2278.83	1796.46	3193.03	1962.54	1992.99	2232.46	1815.5	1741.14	2146.82	3398.1	2026.88	768.919	2405.98	2152.52	2581.36	1887.98	2033.83	1252.06
P02749	10585.9	7980.32	8047.81	9803.6	6499.87	8450.84	8846.78	7357.29	6360.76	4823.29	7819.64	5617.07	6264.05	5652.06	4752.66	4081.74	3350.73	3213.41	5230.35	5721.78	7851.25	5288.43	7078.45	5783.55	9130.48	5542.11	8201.15	7103.91	1810.02	9318.46	6628.6	6636.56	8392.28	10230.6	8378.38	7789.21	9182.49	6664.96	9866.79
P02750	1098.2	634.061	1005.35	716.74	1818.35	1439.23	952.194	1506.42	1374.13	1017.32	848.349	1252.03	1228.52	1278.5	941.581	846.668	1138.06	1208.43	1237.43	694.466	793.629	1352.94	761.085	2011	818.898	694.783	1235.74	1056.52	367.941	1122.91	2103.61	894.239	965.614	1130.05	1081.88	1040.78	765.214	1339.52	721.954
P02751	3583.69	4870.77	3772.64	4340.72	2381.36	3173.71	2756.37	3181.04	3414.21	7152.67	3667.22	3438.78	3339.31	3651.18	4154.94	4107.73	3156.24	4543.25	3559.18	4118.75	2003.56	380.266	5715.36	2444.04	2345.29	2717.15	3607.46	4331.48	3570.56	1723.33	862.175	2317.21	488.84	708.964	465.59	630.575	970.288	2800.06	476.526
P02753	6742.37	2806.84	3152.84	3272.33	3043.74	2121.81	6670.77	2699.47	1809.46	2997.86	1913.37	2683.93	3130.66	2609.9	3126.48	1675.65	2000.34	1604.12	2391.94	2516.22	5313.36	6185.01	2649.23	4536.45	6277.5	1682.12	4403.85	3938.97	1473.49	4130.83	4192.06	3546.01	5844.12	7347.58	3916.29	3479.6	6493.9	3529.94	6354.42
P02760	4620.64	5262.46	4693.76	5514.59	4113.14	4958.96	5115.28	5674.56	5708.88	5298.6	6835.99	5319.84	5004.85	5632.8	5561.22	5052.34	4231.24	4995.18	5716.5	5581.54	5212.24	5255.49	5448.69	5339.33	7197.35	4896.97	5041.04	5406.26	3703.39	6560.94	6209.87	4272.72	5929.75	5769.87	4234.31	4581.3	5061.89	4091.92	6389.59
P02763	5711.98	4228.34	8945.13	4943.77	8323.86	7642.84	4416.95	5925.77	6736.44	5938.26	5002.04	6255.59	6113.3	4112.98	5770.97	5096.15	6540.12	7198.13	7116.73	4936.23	6098.76	9231.85	6729.74	9479.96	4946.25	4303.31	5627.25	5972.47	1464.78	4857.55	6943.91	4878.5	4947.96	5848.02	3542.47	4535.67	3914.88	3844.52	5428.15
P02765	2823	3491.84	3553.2	2932.66	2121.86	2347.27	2551.33	2569.48	3509.06	2988.71	3568.08	2082.57	2459.95	2842.83	2284.26	2428.18	2023.78	2731.18	3001.28	2406.43	2854.96	2824.09	3079.74	1781.95	2695.33	3073.45	1530.75	2452.75	2148.87	3044.35	2740.9	2519.34	2567.17	2893.49	2284.77	2612.37	2952.2	4156.24	2039.83
P02766	1092.47	1260.07	1909.76	1380.64	343.938	396.833	1379.75	1004.26	934.093	1046.01	1007.49	785.735	917.76	913.333	1451.76	956.649	1597.48	1041.74	873.591	1030.8	1020.2	612.675	1714.02	516.985	796.702	1257.07	737.697	559.57	1001.3	496.866	436.386	370.355	764.665	425.383	648.136	462.565	687.585	321.701	637.095
P02768	122169	120852	108398	102481	109411	96085	128481	137712	121052	130760	101420	113430	117464	115191	111300	101663	110443	98373.1	103680	98193.2	123917	134530	107183	91440	112011	105055	108085	108836	91071.6	124319	130572	118288	113645	132244	115425	133060	144266	125246	113857
P02774	22152.1	21739.5	27922.4	25281.7	18066.4	16875.6	17411.4	23683.5	27016.3	23814.2	22091.9	22683.5	22736.7	24528.8	23854.8	24101.5	25670.2	23202.1	25439.9	20227.7	22261.2	20633.9	24868.3	20099.9	18203.5	21621	20475.2	19404.8	21898.6	21578.3	23099.5	20078.6	19839.3	21291.9	21599.7	18937.2	20393.7	15976.6	24954.3
P02775	583.537	1003.1	957.109	996.336	1078.09	351.783	763.623	678.897	731.104	927.682	891.456	839.032	662.147	821.297	933.403	630.809	1207.67	1096.17	886.835	527.038	770.326	531.554	956.505	779.695	664.426	738.942	776.799	505.478	1074.51	773.46	324.884	559.969	860.866	872.897	551.794	487.839	663.401	525.162	940.897
P02776	554.444	386.71	386.267	563.034	867.062	140.208	827.848	229.206	260.841	734.327	290.565	420.006	389.548	447.077	444.423	281.76	581.647	454.131	642.614	182.942	739.21	402.188	574.202	465.665	520.981	170.654	727.624	609.049	564.728	691.853	369.458	424.367	592.037	1026.65	31.4558	568.524	768.38	1212.5	890.647
P02787	51869.6	36087	57736.1	49480.3	45494	42483.4	49769	54696	53805.9	49759.6	31048.6	52161.5	54734	38369.7	48607.6	29196.1	32470.8	29778.6	45366.4	45675.8	60570.1	49265.8	31088.4	48080.5	49870.4	22913.1	55919.9	51518.8	22520.9	55047.6	57463.5	69830.9	55704.1	71773.7	62761.6	49727.9	68274	85946.6	66834.5
P02788	181.671	409.076	802.208	1221.44	246.329	314.246	141.552	343.904	621.93	550.022	602.362	414.339	394.275	340.033	482.036	424.715	389.576	223.595	492.562	1110.29	302.378	90.9414	365.213	87.2963	175.473	370.888	143.63	246.367	294.746	159.303	101.462	183.16	137.571	150.918	16.7141	155.435	134.831	198.056	137.381
P02790	30703.2	29401	36975.2	33830.8	28958.1	43366.1	28236.7	34694.1	33727	38931.4	26684.6	31304.8	31105.4	31761.1	35552.1	30820.8	33993.5	29709.7	46167.9	31304.7	31530.1	26637.9	32241.8	31789.3	26538.5	27845.8	30870.6	29864	2254.43	30734	34412.5	28042.3	28107.7	38317.6	28291.6	27046.4	34201.7	25572.3	29873.5
P03950	17.1295	37.1383	25.3428	36.7231	38.2026	33.3383	35.3255	19.2041	36.9919	26.6428	21.7543	16.13	16.8661	10.4398	23.476	21.1705	18.8562	17.3823	15.9223	28.6585	17.6498	15.9545	30.7077	25.7335	24.6591	32.7563	29.7199	20.5781	45.5877	22.2213	10.5273	22.7225	25.1869	16.17	19.1387	23.5599	22.1243	21.0285	30.9722
P03951	139.691	132.146	166.061	214.149	176.706	130.629	110.239	191.922	195.581	107.582	167.112	139.757	142.074	95.2668	196.746	179.138	142.12	182.224	146.249	131.476	179.806	131.762	195.79	166.284	69.3836	50.9686	159.308	142.355	237.186	146.072	141.968	136.731	178.558	166.862	145.785	138.429	177.133	130.662	207.595
P03952	988.539	1076.51	1045.31	1174.38	656.435	793.407	842.7	984.161	841	971.103	801.641	852.53	880.424	882.015	1183.59	1233.21	1281.39	945.713	1111.32	1005.21	452.756	686.218	995.971	750.779	666.324	925.829	939.558	1050.04	905.614	910.92	765.988	926.704	1006.5	1123.13	704.298	628.202	1106.11	881.406	1311.31
P04003	7955.93	7350.97	9441.18	8450.89	7422.77	9397.67	8385.14	8349.35	7561.52	7965.65	7929.72	8095.1	8529.77	7165.09	9165.42	9142.4	6576.93	9081.76	8748.8	7777.14	7753.16	6641	8291.96	8592.58	6893.33	6358.85	8994.49	9270.56	6902.77	8730.23	8145.24	6799.32	9603.93	8875.47	8787.5	6743.45	7382	5213.08	10323.7
P04004	6782.15	7856.73	9132.91	7509.41	6993.39	9070.47	6498.92	7304.95	8157.21	10244.9	6385.47	6603.18	6746.74	6542.35	9119.78	7621.79	6909.91	8210.55	8332.74	7602.25	7433.19	5077.77	7756.78	6618.29	7359.97	6968.72	5767.99	7053.74	4267.97	6301.5	4571.3	6325.97	7474.21	9516.05	5893.15	5324.9	6368.75	7341.25	8482.52
P04040	22.7434	18.0784	17.3801	15.5939	18.8462	41.1208	21.6749	14.6043	15.4131	32.8886	14.5082	17.0648	14.7141	23.7045	10.5215	18.659	17.3775	15.055	18.9866	36.1099	13.2853	41.1241	23.6656	20.0406	18.3738	28.3327	19.0104	11.9361	17.3337	21.6555	21.741	15.5266	31.766	18.545	20.7007	17.972	29.7165	7.79871	23.0933
P04070	136.504	159.003	191.876	193.521	102.807	124.132	150.719	153.922	121.707	173.467	140.35	136.426	169.861	142.226	203.988	156.236	201.943	196.738	176.595	146.304	124.05	109.296	216.315	135.322	155.863	134.049	142.471	176.789	406.012	126.538	121.706	182.311	165.237	195.956	157.62	125.493	143.551	75.3248	219.215
P04075	10.4523	40.5499	15.9541	17.2909	9.07831	9.84442	17.8994	16.6332	15.076	8.76217	9.18434	13.6968	7.34923	11.3121	14.69	15.001	16.5086	9.74918	16.2131	32.5177	14.5645	26.1909	7.98351	25.7429	14.2772	21.3872	9.98866	16.1447	16.2579	7.71331	17.4016	14.2154	7.03366	12.5752	15.8185	9.98065	12.9751	14.3935	12.1152
P04114	10828.6	5901.24	6876.88	8582.79	6940.42	3724.4	7905.61	6294.98	4067.52	9792.07	5220.23	6728.9	6611.94	6940.51	8445.36	6658.42	6386.32	8690.97	8623.1	4226.87	8417.32	5643.31	10158.1	8155.54	7305.5	6262.75	7259.13	6517.49	4262.73	5535.39	6564.22	6386.82	10966.8	5320.03	7238.81	5646.12	7310.99	4789.95	9124.12
P04180	254.135	346.16	390.229	349.06	151.286	284.636	246.894	258.653	231.013	318.732	315.448	234.271	277.334	282.02	387.162	278.951	326.98	289.164	317.664	309.596	312.478	199.68	384.271	240.364	274.335	306.274	253.241	289.192	290.318	303.481	143.389	271.001	266.516	342.95	174.202	218.053	295.229	174.972	343.325
P04196	3331.63	3240.64	2422.88	2524.58	2671.4	2937.68	2178.79	4029.92	4541	3452.49	1920.74	2732.64	2869.81	2533.27	2715.06	3329.96	2079.63	2846.4	2557.17	2405.37	3475.45	2049.17	2289.18	2779.8	1966.02	3799.09	2168.08	3127.65	515.713	3270.78	3050.75	2012.11	2368.95	1527.91	2345.15	2878.78	2390.07	2110.56	3000.76
P04211	1364.25	2184.24	918.023	990.308	1602.98	1864.73	1611.86	1101.3	1297.82	1378.24	2005.99	1350.49	1332.52	1711.32	1145.53	1545.73	2039.94	833.182	756.873	1063.43	1617.41	2920.49	1240.72	869.133	1237.19	630.13	1762.89	1619.81	461.913	1744.6	2287.84	2234.87	1474.04	1121.47	1938.43	1313.78	2492.34	2994.88	1044.81
P04217	8985.65	8854.73	11864.2	9079.15	9535.94	9277.8	7815.88	9146.84	11728.3	7047.49	13063	10744.5	11057.4	9383.82	9479.34	10857.8	10088.4	10255	9825.87	10425.6	9458.39	12077.2	9602.83	10275.6	7680.72	10471.2	9719.79	8992.3	5150.1	11508.3	11948.2	8701.54	10412.1	10295.6	11819.9	8555.16	8130.61	8887.83	11582.6
P04264	539.951	70.1985	111	855.053	107.652	2611.91	90.0706	253.24	262.115	509.955	299.482	132.752	159.733	140.882	1018.56	611.166	254.611	87.3331	124.411	25749.7	387.005	2830.39	215.632	147.208	135.909	850.63	1015.42	32.0099	508.042	77.6932	140.096	560.307	475.083	440.106	847.902	528.902	41.7869	985.377	38.4829
P04275	168.011	222.756	83.2674	212.297	176.982	684.757	191.411	172.062	272.634	352.869	453.893	169.381	187.176	71.3428	147.134	258.505	219.767	335.265	164.956	148.076	103.026	104.954	152.536	238.236	100.427	310.91	209.638	219.24	313.654	102.373	62.9607	99.0116	54.8901	30.7979	87.0455	103.268	87.7342	185.703	48.0805
P04278	97.7039	105.086	94.9298	101.522	115.795	148.917	50.03	106.91	117.204	111.788	495.564	156.893	167.101	324.935	72.2793	88.4597	163.221	117.528	247.125	98.7717	101.854	272.541	95.5	96.7889	92.5268	480.591	251.995	78.175	65.8625	280.261	189.946	84.8226	113.212	105.646	221.94	229.733	144.266	318.362	49.8996
P04406	9.09203	52.8454	5.77446	2.73591	5.38024	5.66376	13.4529	4.33651	4.23027	11.5017	6.81704	9.95886	3.56641	21.7288	2.60495	11.8434	2.6973	2.95886	3.84782	63.9109	23.544	12.5194	5.2742	28.732	10.1491	40.7519	7.81013	5.93356	74.7684	6.2444	6.01651	10.6989	4.99939	3.80772	26.7291	9.23652	3.9145	26.1462	4.41867
P04430	64.2751	34.5366	15.1541	24.5539	136.444	65.2377	26.8179	37.0686	33.8588	18.9451	29.8131	35.0267	38.4653	50.0672	27.0198	51.8515	16.9688	31.7999	43.8683	25.6764	19.3672	95.2586	36.1378	45.3137	101.875	22.215	96.3793	183.817	64.808	117.527	107.558	95.163	22.4829	57.2697	106.468	128.996	121.9	82.7016	43.5228
P04439	141.742	7.35042	13.9747	20.3969	20.7351	10.2088	11.4725	8.25107	33.96	13.4883	20.4873	24.8696	41.0995	4.43038	11.1206	18.0126	23.2713	8.41248	11.4881	4.29062	11.8267	30.9594	14.3873	9.15098	5.59221	20.8733	35.4972	67.7503	18.9852	8.39632	21.6897	6.76855	9.04922	29.9259	2.43259	36.0891	8.27387	37.8764	35.5812
P04908;P0C0S8;P20671;Q16777;Q6FI13;Q7L7L0;Q93077;Q96KK5;Q99878;Q9BTM1	2.08854	30.0131	6.34076	7.78452	10.3418	11.925	13.8346	6.13402	6.65397	11.7926	3.26668	9.33914	2.05315	10.0501	8.79126	18.9594	7.252	9.07916	14.3909	19.9298	9.24298	7.92807	3.55668	13.0878	4.21664	15.4357	6.9664	8.84921	50.3915	5.11097	11.7656	9.38122	2.21319	8.18846	5.49043	7.66365	11.8778	32.3026	5.69942
P05019	18.4992	15.8154	15.8136	15.8301	15.7582	6.31115	13.7541	13.4261	13.5714	13.5097	8.88453	10.0021	17.6702	7.83919	21.1361	16.9956	12.1532	10.5657	11.4401	10.3922	4.85303	5.70513	26.2273	5.57568	5.1342	12.547	9.87748	29.1778	15.6772	6.81379	12.279	7.13801	8.34924	19.9578	10.1196	5.18709	10.1857	11.1933	12.7201
P05062	432.698	452.416	396.16	480.83	1068.17	2185.52	410.718	359.68	489.514	575.726	527.165	573.074	324.004	92.1145	635.964	806.238	443.168	466.814	542.333	807.965	325.373	495.614	533.313	504.591	691.369	251.289	60.5497	207.382	488.352	408.04	296.822	312.072	685.067	570.236	418.578	163.967	394.65	2082.74	685.777
P05067	16.6713	12.1105	13.2888	14.4632	22.485	5.70456	21.8882	9.3733	14.5364	11.0338	7.77341	15.1214	15.6986	24.3155	12.551	21.0802	18.5508	10.6397	13.6057	4.47243	9.2843	9.73625	16.8529	9.83163	10.543	18.0067	15.335	17.338	14.6805	16.5274	7.81559	12.5641	11.9596	16.8245	5.91994	6.9331	7.43731	10.006	22.4988
P05090	5637.44	2827.35	2661.61	3660.32	5381.13	5003.61	5038.14	4810.07	4389.32	1861.37	2203.46	3277.94	2722.98	3318.87	1948.47	1506.12	1593.6	1384.79	2414.62	1274.25	5272.67	4792.84	2951.37	5443.39	5909.78	3967.5	4324.04	3957.92	5593.87	6504.55	7216.49	4688.84	5685.34	5703.23	5585.99	8370.88	8973.73	9930.31	5597.09
P05154	41.6697	65.4193	43.9139	39.5029	32.3346	43.0082	35.4474	56.9627	38.0153	70.904	82.9	50.626	43.5605	48.0997	45.9202	69.6938	44.6853	48.2243	64.1844	51.7967	43.5859	64.6001	47.044	26.2506	51.3603	47.2803	73.8648	50.8464	221.218	49.6334	52.8439	41.9247	48.9506	60.078	61.6477	63.3633	54.411	53.8782	51.9569
P05155	8205.62	7672.31	8273.71	9468.53	9049.8	13483.7	5781.09	10345.7	10038.5	11535.9	11573.2	9646.28	10234	11450.1	9163.43	8879.07	10145.7	9182.75	10779.9	8850.36	7632.17	8876.21	9996.36	10410.3	7299.84	10677.7	8286.19	6601.1	7057.68	8835.92	9688.55	6565.94	7710.88	11664.4	9517.68	7487.29	8129.33	7568.87	8201.71
P05156	524.055	912.042	1190	828.524	782.61	1317.92	684.919	677.138	849.803	1187.32	780.36	699.724	758.776	806.223	714.923	759.205	835.24	1036.93	888.505	674.033	613.789	550.985	760.31	814.942	693.13	635.407	631.188	720.201	539.967	740.334	680.786	639.843	706.642	907.067	594.365	511.239	661.394	518.52	854.989
P05160	256.459	178.722	212.111	241.69	325.831	150.821	268.776	207.764	118.793	88.5168	306.146	182.567	214.961	225.632	159.476	93.9479	102.378	96.3026	125.032	134.379	227.109	214.325	120.046	190.256	250.252	166.683	235.327	233.81	45.098	213.715	205.672	187.691	233.013	230.404	179.112	182.472	174.964	238.792	236.742
P05362	12.788	6.49104	7.21735	7.62966	50.4948	19.3531	13.1948	9.56654	9.8984	17.2713	11.6951	7.2536	4.99386	12.3969	11.4525	18.964	3.71555	7.2041	18.0359	14.6279	3.30281	11.965	5.74913	10.5651	15.8408	14.6088	13.8011	7.25587	13.7904	13.999	11.4506	10.9135	9.85161	13.4769	9.62835	10.4217	9.61234	26.1162	10.0339
P05452	402.258	456.844	334.702	469.234	299.034	326.258	343.701	443.628	467.148	454.002	585.272	444.057	379.204	494.823	475.014	635.67	484.825	359.757	519.65	430.686	398.084	367.604	454.201	307.43	275.513	504.307	306.739	358.177	217.026	491.332	351.18	347.491	351.9	411.479	361.155	441.837	383.2	494.031	342.767
P05543	487.822	455.072	369.975	344.794	534.68	455.674	398.893	313.683	351.502	350.983	258.554	476.334	480.887	479.081	358.791	363.668	360.478	376.218	486.974	348.29	545.044	636.714	361.992	590.734	586.865	335.62	614.947	683.084	224.867	714.048	619.932	539.992	420.804	834.646	699.688	728.024	507.1	732.064	395.015
P05546	4536.59	4162.8	5456.5	4127.24	2431.32	3798.13	2654.51	3019.73	2487.42	4236.36	3500.82	3368.73	3155	2924.11	4626.37	2771.44	3457.63	3773.73	5453.98	2950.96	2847.18	2105.2	3730.93	2355.96	2080.79	3391.73	2868.08	3170.57	805.441	4345.07	3106.52	3082.56	3576.01	3247.2	3153.92	2720.01	2874.03	3067.08	3467.1
P06276	525.751	390.837	433.298	421.379	214.765	269.847	245.17	278.637	342.918	446.863	366.636	290.902	264.539	433.531	394.821	392.785	388.075	395.177	412.745	469.358	347.558	268.694	432.007	254.923	345.248	343.114	279.635	304.266	888.368	331.414	278.753	337.02	260.766	395.619	240.987	244.143	364.498	317.688	468.291
P06312	2580.15	1176.89	971.923	642.628	1899.55	1264.52	2192.91	1191.96	1126.9	1167.75	1140.58	1759.26	1736.9	1563.53	1053.59	1098.77	1000.6	860.678	789.119	869.172	2006.5	2403.6	886.287	2212.13	2808.7	642.581	2514.71	3725.32	1547.01	2314.69	4396.98	3666.75	2549.97	1962.07	2703.29	2320.57	3924.81	4027.19	3301.91
P06331	519.279	262.686	167.307	216.652	377.34	285.578	492.423	368.192	155.571	315.159	230.718	359.423	419.076	481.118	398.409	443.992	289.137	287.442	449.996	314.404	683.687	547.039	124.735	436.904	1050.36	145.961	623.887	649.089	2477.94	506.786	716.753	623.597	490.581	535.245	394.216	831.966	279.907	1277.52	971.086
P06396	2654.66	3946.44	2851.24	3335.44	1854.09	1960.7	2151.11	4172.21	4221.2	4121.09	4141.85	3212.73	3189.17	3822.15	3127.12	3435.14	3163.18	2339.48	2496.34	2741.43	2752.7	1248.28	3159.15	2083.83	2702.63	3675.12	2459.65	2541.27	3140.61	3490.2	2698.41	2186.74	2752.8	2198.15	2580.81	3393.11	3210.63	2561.36	2010.79
P06681	727.656	712.874	952.506	822.859	938.5	949.905	743.221	729.855	865.53	886.05	830.837	755.133	816.221	819.172	856.135	917.695	855.919	903.827	867.708	717.186	668.364	861.809	811	698.463	620.735	694.388	688.48	698.589	562.735	640.13	769.789	662.6	690.525	909.154	759.946	634.106	591.689	546.673	873.714
P06727	11021.7	8506.84	10036.6	13989.6	4722.79	25085	18231.4	9021.37	12671.2	14039.2	10769.1	5981.72	5736.47	11236.5	9129.39	13994.7	6175.52	8635.85	8751.07	10069.7	10930.8	8076.12	10413.4	4643.13	13274.8	16270.4	9396.61	11712.4	4756.02	11679.7	11139.4	7292.95	10545.6	11144.1	5409.48	9026.18	19346	21213.4	7394.5
P06733	22.3207	149.327	10.8784	6.04971	14.505	20.2423	43.135	9.09758	11.462	20.8468	13.0428	31.7886	6.59271	40.5912	6.56866	25.6886	12.8658	8.19628	15.4551	165.274	20.503	19.7539	8.13565	88.3961	17.2161	102.428	11.2346	15.3794	330.956	13.7162	4.18522	29.9258	10.9764	19.4648	60.3365	11.8811	10.436	47.3077	11.9307
P06753	4.70612	4.48206	15.0675	7.72748	22.8272	15.7543	10.2314	15.957	16.9315	10.9367	8.47267	7.17144	3.87403	34.9162	9.16931	16.9315	16.7452	19.8553	11.121	27.5098	8.31617	7.88779	8.88231	10.3838	9.31163	16.9315	6.24442	14.4197	26.846	8.23792	8.92581	7.38057	10.3838	7.05942	7.89391	4.8077	9.69583	10.8549	8.90042
P06899;P23527;P33778;Q16778	66.0187	220.146	75.5538	36.5039	88.269	108.265	93.8744	44.9234	60.2806	90.5297	59.0191	53.0074	34.5516	74.3513	50.041	78.0494	70.31	60.4931	93.3332	178.196	61.715	76.7043	51.0285	124.322	54.7746	119.763	55.7379	53.3841	3660.41	54.5772	52.8139	55.3051	53.2231	73.0575	85.058	74.9998	53.7151	252.303	53.1328
P07195	33.3463	33.6595	18.7668	29.2748	26.1939	39.4994	26.8618	42.9863	31.8571	31.2099	32.347	25.3368	27.1585	40.4652	27.6305	37.8889	23.0345	25.3459	35.0929	35.2433	35.3504	102.527	30.986	29.9619	33.9171	44.4068	42.9849	24.2727	30.0244	30.4101	38.6904	28.5032	29.5196	30.501	33.8656	41.2612	39.759	68.8018	32.0776
P07225	517.934	552.496	812.607	736.018	418.058	588.875	576.961	642.504	628.615	588.347	639.103	511.325	589.446	539.057	620.128	581.974	613.971	713.755	701.382	663.871	561.797	389.922	721.832	558.662	511.782	523.627	558.359	548.185	275.23	612.541	450.8	545.237	621.972	639.602	550.832	477.875	583.144	429.942	742.584
P07237	8.78323	10.4812	5.13651	8.02089	5.85079	15.1132	7.00168	7.7449	2.91677	8.06026	5.4821	7.12335	5.12416	7.93149	8.00608	17.2004	4.32785	7.64388	7.92135	7.80589	6.28425	6.34233	5.61329	4.16228	1.29999	8.94434	6.1414	5.93653	6.69829	5.42823	6.10032	4.35722	5.95283	5.87069	3.33372	6.19231	5.22507	13.328	7.77622
P07339	15.4199	15.1249	12.0839	13.763	13.4922	7.28699	13.3815	6.04182	11.1686	27.1218	11.435	14.6127	8.53216	10.3998	12.7833	14.6157	8.58679	11.0767	12.1378	51.5625	16.7772	25.8542	11.9331	12.4616	22.8827	13.1868	8.81875	15.3741	12.1281	12.4417	13.7424	14.2241	8.28269	35.4709	20.2236	24.1257	23.3813	20.8393	10.8405
P07357	488.299	581.517	846.35	718.72	573.751	659.451	728.445	769.715	686.263	616.28	731.393	617.544	599.861	617.22	725.832	604.606	791.785	861.16	657.119	648.566	365.139	448.312	706.985	654.007	631.226	710.422	479.474	531.212	440.085	571.91	466.102	475.714	547.804	661.822	652.46	416.3	492.01	551.258	524.507
P07358	611.713	859.399	1157.61	995.936	672.578	906.735	925.245	928.739	961.774	852.302	1039.97	710.683	792.682	832.725	920.398	884.054	1046.92	1125.24	974.665	872.075	548.226	621.081	937.416	875.93	821.81	1132.7	643.631	715.402	458.148	815.809	692.884	636.132	707.665	905.026	866.301	571.708	719.409	722.673	786.833
P07359	116.649	92.0006	170.16	113.979	120.627	49.6681	182.463	86.6124	93.1505	177.835	100.543	105.844	108.18	125.215	111.58	117.038	116.474	122.051	160.103	103.62	71.5752	276.398	105.498	101.741	83.7159	64.0111	143.756	131.969	121.223	88.0993	82.0918	70.5881	57.6861	90.1778	60.8105	83.5198	82.4092	117.926	73.2096
P07360	563.669	613.71	934.009	796.039	636.34	835.989	599.648	657.119	740.667	719.673	681.532	484.02	502.297	635.718	602.304	634.797	604.737	786.501	774.102	635.886	230.953	513.823	698.307	733.967	740.662	839.985	503.848	593.98	292.32	641.97	527.426	608.559	605.354	714.536	788.771	419.53	597.368	613.095	723.059
P07737	17.0416	42.303	24.1226	32.5605	26.0554	30.0057	46.6664	16.4034	10.9002	9.7753	28.5618	7.78344	6.62696	26.0369	12.3147	13.0068	24.5715	20.7508	14.2912	36.0163	16.99	30.2573	8.72191	12.5379	15.7785	24.9512	31.0133	28.0124	25.6938	16.6848	19.9852	8.48025	5.57659	5.87353	5.7565	18.8866	9.11872	24.2134	14.0239
P07996	364.566	462.26	610.197	499.125	590.208	90.0608	549.518	256.797	345.485	638.393	465.946	400.077	433.617	603.513	451.739	376.374	608.754	643.888	520.318	402.664	404.331	361.962	454.95	213.194	272.749	263.906	585.479	443.753	683.236	304.482	171.299	336.73	376.428	430.748	361.016	242.101	371.121	441.278	464.643
P08185	1549.94	1612.56	1846.49	1559.45	1426.81	1338.75	1015.98	1441.97	1661.72	1398.1	1437.54	1503.82	1575.19	1924.65	1436.44	1726.73	1815.6	1497.2	1602.9	1370.67	1838.29	1113.93	1564.51	1159.88	1257.13	1638.04	1316.1	1354.64	1169.95	1325.14	1814.08	1397.29	1503.96	1665.37	1274.34	1151.43	1541.07	1551.29	1369.46
P08195	6.20655	5.97339	3.60672	10.1544	6.37161	6.15805	8.23981	5.37945	7.80058	30.5755	2.94418	6.62623	3.92464	4.57211	5.62948	10.4398	4.24792	1.94124	14.8011	5.65402	7.25963	8.21113	6.30274	4.60913	4.78285	12.0136	6.71216	4.20511	4.96545	7.27612	15.8181	19.1155	4.05278	7.4545	5.05408	30.0379	17.1213	10.6585	9.45558
P08238	47.3268	37.4533	61.5828	30.7911	18.2598	23.6551	9.4157	25.8838	15.8923	27.0748	18.2365	16.1334	21.3992	18.2563	15.1087	72.3603	28.5486	19.5981	31.965	27.5187	14.5155	23.8706	15.2473	20.6366	12.7956	21.816	21.4419	16.5272	18.9426	15.4717	16.7095	19.6303	20.8277	24.6767	21.0409	20.361	16.6039	10.6243	10.5118
P08246	16.0895	42.3497	20.6252	20.2185	25.3339	11.4777	4.76559	9.45245	19.5591	13.0336	17.4977	21.3314	14.7945	17.079	9.6914	13.5412	36.7643	23.8124	25.967	10.0654	15.8092	13.6144	14.5608	17.4095	14.6476	30.9357	2.08846	47.0469	20.8338	8.27273	16.0276	15.8221	18.8059	10.1702	16.462	15.8246	15.6254	26.4722	10.4276
P08294	30.9915	220.678	10.0952	26.7092	11.6813	15.592	13.5298	32.1523	34.0574	9.74433	28.0404	33.7743	33.6828	32.6165	27.9634	37.611	28.8892	28.0263	26.2661	15.5297	17.4908	42.6044	11.7146	30.8431	29.0657	29.5169	20.0019	31.0494	42.3528	39.5778	24.5489	31.2618	50.7131	23.9359	37.7703	41.2	39.2312	54.2262	18.3626
P08514	3.46179	14.93	4.1295	6.21552	5.52394	10.5239	10.3309	9.06194	8.60656	6.77093	7.95397	2.6566	9.99152	17.0423	3.24953	4.31552	8.8721	5.41886	6.5107	8.60656	6.70402	26.5125	7.07022	25.1709	11.7433	9.75545	5.28173	10.087	9.43667	11.7433	7.8063	11.0613	8.37364	10.3128	6.1896	11.0613	14.0417	7.8063	11.0613
P08519	162.198	755.152	235.869	1956.81	228.702	208.584	59.6968	879.72	221.226	5018.45	427.672	455.812	531.813	1931.93	239.717	82.0487	146.411	2576.57	480.047	106.03	231.798	264.77	190.625	823.14	542.531	312.013	1694.76	242.131	2019.52	7101	460.138	1632.35	703.33	132.517	983.775	900.558	695.669	541.359	150.914
P08571	150.074	176.2	188.856	224.646	218.096	222.045	185.989	147.35	174.709	176.07	198.592	162.579	158.802	191.105	150.176	194.795	140.6	192.7	268.34	131.403	175.078	241.022	124.552	170.078	169.043	201.708	211.208	164.663	335.952	204.549	188.435	169.004	164.819	216.573	195.272	186.956	159.352	195.18	182.182
P08603	5039.88	5929.37	7197.13	5996.01	6506.41	6142.29	4495.18	6085.39	6314.81	5879.71	6772.97	4890.12	5172.86	4749.07	5503.64	4982.87	4442.96	6041.65	5360.63	5717.75	5286.57	3369.3	5272.34	3761.82	4784.67	5759.4	4731.81	4970.38	2863.27	4705.02	3891.36	4911.3	4684.63	5033.66	4361.45	4665.77	4264.55	3249.81	5196.28
P08637	129.849	45.056	60.1472	61.2363	180.889	132.087	119.51	98.891	100.188	109.98	82.4822	116.603	72.8124	138.786	61.6593	86.1829	95.7246	44.2469	55.0674	120.608	117.028	103.756	56.4763	89.8546	136.615	119.677	126.002	95.4093	90.1585	80.2127	79.2125	91.8154	78.1012	84.4361	81.6307	78.731	133.447	249.814	104.659
P08670	6.63225	66.2081	5.92929	35.7734	25.1907	35.6129	12.9288	33.7562	18.5299	42.1765	7.27974	45.8439	51.8558	37.1104	27.3563	73.9686	46.7926	24.7201	33.4759	95.4351	26.1697	37.124	10.3812	72.147	11.7924	58.685	14.3541	15.9348	412.586	13.8959	16.9693	28.2796	9.28693	17.428	16.9939	26.1693	20.5063	17.3272	26.2146
P08697	3239.59	3627.77	3527.05	3217.34	2714.68	4096.46	3026.17	2678.83	3378.2	3280.97	2416.4	3010.8	2846.74	2854.07	3389.38	3912.28	3446.56	2884.24	2982.67	3273.7	3942.89	3574.16	3499.03	2774.91	2936.91	3260.3	3094.54	3057.84	4101.4	3359.52	3074.56	3185.34	3186.28	4443.38	3126.46	2982.27	4018.2	3184.11	4183.85
P08709	38.2628	27.8454	30.0018	41.7485	13.4112	49.1511	44.3026	18.5024	22.9623	58.946	30.4943	18.8535	22.5874	38.1171	23.5648	59.2413	28.3798	20.7115	60.905	37.4246	30.8581	16.0149	26.7681	16.2106	36.4174	37.4686	29.6857	39.6802	27.2674	36.2097	24.3136	39.5254	28.6341	35.4622	23.6342	33.0124	35.2583	35.7022	40.7708
P09172	24.3858	89.2244	49.0878	44.8285	52.2585	33.4603	19.0764	57.4258	40.699	28.1419	26.7337	20.1883	22.5808	23.398	39.9671	65.2716	50.1311	37.0522	47.8897	19.0422	43.2022	18.2536	53.3509	14.2964	13.1866	30.0289	15.9961	7.9088	37.4209	42.2231	31.5264	22.1582	34.0141	76.9988	10.3092	24.3512	31.4106	53.2461	15.176
P09486	63.5024	69.8826	85.9831	72.0688	67.6479	32.4874	92.1253	44.372	46.4629	92.0431	62.29	58.6449	65.1916	83.0411	61.1366	72.0695	67.5152	55.736	57.6596	49.2646	69.9525	31.7625	81.5999	44.7899	67.5074	55.4206	66.5644	47.3553	64.9128	56.7224	32.236	47.809	61.3832	44.1671	55.2384	37.8541	65.2558	78.5682	99.5953
P09871	2387.39	2933.93	3333.68	3145.96	2668.54	3546.26	2518.51	3487.02	2832.98	3463.48	3621.52	2176.37	2246.84	2848.56	2971.03	2820.2	3218.94	3065.52	2829.78	2845.71	2537.81	2741.27	2959.2	1725.23	2738.14	2782.95	2390.84	2102.52	2824.54	2497.06	2129.73	1973.65	2405.35	2550.16	2677.32	2119.66	2573.76	1986.68	2068.66
P0C0L4	5608.31	4631.94	3344.65	7077.74	10466.8	7478.13	6901.33	4852.93	8371.64	6996.88	6392.97	11863.1	12001.8	5676.14	4362.78	11278	8523.23	10774.9	10473	7381.84	9281.05	9658.46	10431.3	11030.6	8116	4906.43	11778.7	7484.22	12327.9	11487.5	11796.9	9749.91	7837.95	13427.1	9604.04	9913.7	9632.86	7167.88	11552.2
P0C0L5	436.238	600.613	598.534	817.226	516.662	1230.65	538.9	940.639	1213.68	1140.52	996.541	835.402	929.69	896.923	528.261	811.082	787.743	1384.11	1175.26	1345.15	716.169	694.839	1714.99	668.806	901.212	1097.92	1102.66	429.408	132.991	1250.1	941.139	917.959	666.349	1014.92	1345.32	782.485	965.68	462.047	1002.02
P0CG47;P0CG48;P62979;P62987	49.1755	52.9381	44.3335	24.7651	32.8436	83.3838	51.2941	47.0509	112.108	65.7966	34.6922	32.0689	21.1185	68.9062	40.2616	40.0967	62.2255	20.539	113.072	303.935	33.7995	47.1826	17.1299	22.3737	69.1753	55.291	56.645	76.7258	40.5443	53.9094	64.4917	48.3764	45.089	77.5134	8.86599	71.7105	46.04	84.5257	51.128
P0DJI8	76.022	16.3541	48.5575	130.79	877.246	1551.06	91.146	103.289	50.8879	74.5997	172.183	66.1506	58.9276	32.1535	30.3552	57.6432	45.7609	114.648	36.3096	28.1331	28.0353	39.7276	28.5277	1771.94	51.9219	27.5252	71.4623	52.7917	55.3133	67.6918	262.478	35.3404	115.006	39.6818	29.1938	13.9091	38.6712	154.954	89.41
P0DOY2;P0DOY3	7577.12	7553.91	6537.48	6288.17	7382.59	8126.65	8848.87	7194.5	8562.02	9793.43	9148.29	7934.84	9296.56	8785.39	6708.62	11020.2	8655.39	7101.54	7000.96	6587.4	9639.43	8154.19	7870.12	6927.12	8596.1	5227.54	7021.5	9756.77	22393.9	11018.2	16705.8	12442.3	7981.02	6526.52	8749.89	15036.6	10089.1	16754.2	9677.43
P0DP01	27.9846	18.3006	15.7907	12.0961	16.4587	14.9743	27.4324	15.7923	19.6739	19.2834	19.855	11.7421	16.6583	20.2462	13.01	28.9525	26.1893	20.4252	17.5879	9.62498	23.016	62.5449	14.8665	18.8578	20.2617	21.0147	13.9457	27.4819	18.1335	8.1622	45.5475	23.0839	52.4077	25.0043	43.8495	22.7859	15.5328	20.7377	11.4776
P0DTE1	17.7314	84.1976	43.4102	33.9685	25.7185	17.3874	56.3493	51.4547	19.7132	22.7207	61.572	17.5107	34.5275	47.6896	36.2907	50.3364	19.1152	72.7073	34.1965	57.941	36.0405	9.19306	45.4571	35.0553	55.3662	23.7347	24.0001	33.8118	47.516	55.3579	70.899	66.808	30.4542	31.2343	24.9808	84.7969	29.0865	54.5573	27.0004
P10124	12.0317	8.66068	30.9863	16.7873	26.2867	19.8974	31.8472	19.2918	19.6194	25.227	20.5191	15.7742	17.1129	27.5653	10.6066	22.6759	17.1483	16.7888	29.0603	20.3152	10.3889	14.619	30.5072	17.5424	20.3229	14.691	23.2674	17.0738	30.7084	10.6436	12.1922	12.2394	16.1957	12.3834	19.8605	20.3718	22.1575	20.6623	19.6308
P10599	16.2801	20.1573	16.5899	17.5485	16.86	34.3738	20.7881	19.0621	18.0855	23.3515	19.7863	9.88967	6.13457	22.409	14.6917	18.2203	18.7824	11.7806	15.8835	205.174	19.5932	46.4123	14.2873	14.639	4.61095	31.1647	19.3636	3.43433	6.93053	19.7136	48.6445	18.6097	13.9396	18.4598	11.0158	17.903	9.72494	16.3426	18.4897
P10643	803.903	925.708	915.2	1359.31	740.664	1465.56	882.244	1407.45	1239.95	987.374	954.545	913.855	925.336	1452.02	895.104	685.128	1061.68	1046.52	1226.84	826.873	1052.67	1134.62	1268.68	922.114	1134.89	1182.75	1029.14	929.246	1483.95	1077.48	424.408	1059.8	870.966	1075.28	1141.87	1286.48	1346.63	1513.06	659.638
P10646	16.8943	18.9766	18.427	25.5318	15.5544	25.4957	11.8752	27.7183	11.9881	25.2552	20.266	18.4749	15.3542	45.9239	24.6048	66.1316	15.0979	24.3978	15.7036	40.466	25.1959	19.8488	21.2798	9.60141	6.08108	19.7213	2.19277	17.5185	17.1457	15.9425	38.0066	21.2216	19.398	12.8529	4.80072	34.6518	17.3597	15.5075	6.06108
P10720	719.652	963.681	928.639	1092.24	1197.82	204.36	843.463	456.328	608.612	786.082	487.922	758.612	768.291	933.352	952.118	725.287	1127.39	946.977	905.894	486.557	783.422	569.232	1224.83	736.754	816.61	665.797	775.12	732.499	1568.97	742.876	485.482	488.803	939.637	865.435	569.874	597.919	796.382	780.238	1037.59
P10809	3.92583	32.8841	44.498	16.9666	11.9233	43.361	6.83832	11.6045	11.9936	5.67633	2.8432	6.21708	6.68447	15.2008	15.788	10.9975	15.935	11.4603	16.9666	38.6491	9.27001	4.91272	4.35957	21.6999	5.91309	16.2328	2.27369	7.09774	102.448	3.70955	3.52993	8.58105	2.54594	6.54384	7.38724	7.05638	5.5879	11.5626	7.33308
P10909	6411.37	6884.91	6749.34	6874.04	4754.92	7189.99	5835.25	7373.31	7492.38	7540.88	5555.97	5936.51	5641.02	5855.6	6501.82	6236.51	6918.43	6799.02	6367.93	4877.03	5344.18	5145	5944.42	4684.43	4382.45	6486.4	4730.32	5540.25	2853.06	5080.96	4621.07	4895.71	4689.41	6362.33	5559.1	5198.25	6075.11	3555.15	4581.33
P11021	23.2781	20.1598	16.3389	14.5812	20.6265	13.5364	16.1312	18.1223	18.2319	14.3031	17.8627	15.4147	11.706	28.5895	13.8213	16.323	14.4127	13.6261	17.7461	25.128	16.7845	16.7044	15.18	15.9605	12.5577	17.3262	14.3696	16.6884	16.4426	13.3486	14.6993	18.4446	12.1685	18.6132	10.5051	16.729	18.7671	22.4766	17.1604
P11142	16.9433	50.898	12.1628	7.20341	6.3426	16.9344	23.2312	12.7456	14.3766	12.6171	14.6914	12.3095	9.29572	8.10548	7.11387	18.1107	11.2941	3.14783	14.3932	64.614	14.4915	21.8537	12.7241	21.1089	17.8829	76.3275	17.028	6.15181	16.2438	14.0574	13.8697	15.2639	10.9928	20.3868	7.42542	14.8266	11.1438	19.8527	13.8612
P11226	413.353	262.442	80.3974	109.131	651.497	271.801	77.3179	31.9876	67.3768	187.451	421.933	208.214	185.195	139.049	15.0932	31.4613	40.8514	280.327	345.128	59.2514	231.549	232.382	100.468	84.1903	111.157	735.453	268.828	187.114	123.962	240.476	101.417	132.454	56.9917	221.383	92.0243	435.891	119.773	452.96	27.3635
P11279	23.3993	10.8707	4.60876	11.5439	15.5464	19.6151	24.03	19.7724	21.7606	20.4705	20.7011	14.3557	17.5708	21.0863	17.8388	12.0194	35.0677	32.1288	18.616	31.9243	17.1558	14.3874	22.7648	19.1922	19.3365	13.3772	24.7023	24.7137	21.503	13.296	38.0686	41.2324	23.9113	19.4159	9.46374	31.8535	16.4171	32.7921	26.8312
P11597	41.055	48.7528	46.6317	56.1557	28.9951	51.8409	40.6416	51.9389	35.7862	56.328	70.8865	59.2195	56.2921	72.7768	53.6063	58.594	74.0437	62.1118	54.652	53.7128	41.8863	47.6454	40.3736	38.7033	42.2266	76.4102	61.3287	42.7086	25.9399	25.9324	44.169	22.6887	32.4189	31.4655	50.4396	41.0702	42.7412	60.1944	38.999
P12111	107.742	64.7861	58.4145	78.0498	56.6856	71.325	78.2685	85.2488	89.4432	96.4012	128.654	93.1217	100.797	99.6839	61.635	92.7465	80.1298	61.3699	72.0413	105.368	56.195	68.8954	80.8776	87.0621	96.2134	76.6379	71.6244	100.457	79.142	73.9786	97.3237	88.6228	74.946	66.4405	56.3913	115.198	75.1137	89.9197	59.4967
P12259	102.408	136.039	138.54	149.542	124.504	138.121	93.2874	129.574	93.009	94.5589	113.336	115.571	113.215	103.356	130.809	125.756	124.865	131.875	103.471	93.6808	110.873	90.4525	130.348	121.597	80.6365	130.296	113.928	82.009	103.821	89.9529	87.3982	87.2319	95.7139	111.815	115.941	116.889	93.3356	94.0839	95.1364
P12830	14.9372	13.0405	8.36984	15.0245	13.082	20.7586	23.6193	9.31785	18.0775	12.8633	9.43231	12.2933	10.901	13.0306	10.3001	19.3725	11.3123	13.9232	10.7987	14.3018	13.3068	18.2444	9.73159	10.7722	12.586	11.5634	9.34691	19.3114	13.256	10.1885	14.1978	9.75649	15.315	13.5213	10.5385	16.178	12.0554	9.04994	21.5206
P12931	26.3805	54.9935	36.506	38.9437	25.0113	27.8647	25.0717	35.0284	40.5586	52.561	20.9812	37.4011	19.3734	2.27941	56.6603	22.6951	37.6149	73.7398	26.5999	41.076	32.1088	32.4189	39.2919	41.2941	21.9236	26.3366	18.4183	16.1609	40.3212	26.56	20.2767	29.5819	16.9459	34.9022	25.7368	24.0221	26.2964	21.5212	24.7969
P12955	9.7231	12.683	7.87753	16.9172	12.3655	25.4819	7.89874	10.5405	6.83099	10.6787	10.6767	12.9102	10.3082	7.72033	10.3848	8.98358	14.0409	11.7303	14.9547	11.9301	11.5343	14.8872	8.92142	10.6294	9.4855	12.7843	12.3103	15.1312	11.2223	8.8535	7.27646	13.5107	3.29107	19.48	5.51138	6.3323	12.0222	10.5798	6.68048
P13473	836.147	814.419	1139.35	1020.49	801.271	1043.34	1069.15	871.009	1576.76	1473.59	1436.18	659.089	674.405	1094.25	693.014	1516.9	1428.85	715.902	1467.58	1232.15	1926.33	804.649	1721.88	1212.93	1382.35	1031.32	999.95	1160.98	1062.57	829.453	981.89	1162.85	1057.86	900.911	297.986	836.545	1616.27	1379.87	1224.56
P13591	17.636	34.9221	25.177	18.7981	22.3113	18.261	83.0022	24.8306	38.4896	17.097	25.8199	33.8021	21.492	37.8041	27.336	32.4216	37.2654	14.8564	24.9311	29.3413	19.2816	14.2634	35.605	32.0775	40.2405	34.2908	23.5694	28.2035	32.7703	23.5247	32.6246	18.6128	22.9043	28.6142	14.706	30.8608	11.5508	31.7089	27.4284
P13598	11.4165	10.2019	10.6001	4.79526	6.38331	6.7913	17.0963	20.3183	9.352	56.8514	6.82131	10.1675	20.5743	14.8958	7.01345	16.209	11.5691	7.94323	25.2261	20.6872	23.91	38.6398	14.1163	13.196	9.38296	20.2199	14.8656	21.9439	11.9581	60.0491	34.6728	34.7672	6.95206	10.6825	14.86	37.4717	11.6079	24.9744	21.4483
P13645	251.624	35.5612	29.1166	419.148	54.4298	2637.39	47.3469	52.2008	110.488	250.847	254.939	91.1809	101.577	48.9894	610.219	223.251	108.829	61.722	53.4144	13273	90.0056	2828.29	83.3709	70.1208	72.9672	872.67	1035.24	24.8358	329.468	54.5559	65.5262	144.87	361.295	305.905	272.551	319.205	31.2551	604.874	27.3972
P13647	15.2734	18.9724	10.9849	25.3524	6.5535	94.8052	13.4553	16.4109	12.7117	23.4716	13.8687	10.1285	8.69765	12.2846	38.2745	30.1153	18.0458	19.154	9.01058	3919.7	10.2479	138.225	14.8789	9.77427	2.98101	22.3253	15.8965	16.7942	16.1002	14.9699	17.5669	27.6115	21.7344	24.3	13.3794	26.363	33.9138	39.7607	7.65994
P13671	753.963	858.424	933.577	960.144	538.996	1079.33	674.429	897.47	920.033	999.917	967.927	836.534	888.415	908.714	876.545	977.948	1020.67	1075.46	1069.33	768.761	913.845	803.076	798.218	1179.37	686.503	805.596	920.097	884.588	1016.08	1025.73	864.779	961.274	1018.06	1120.21	860.641	864.501	720.141	888.234	952.958
P13727	13.7162	14.1781	23.2662	14.9954	10.7168	12.2606	14.0786	15.0013	20.2917	12.2038	17.3366	1.70505	13.6426	14.9707	14.1543	15.6564	10.7458	14.1566	14.5815	12.5953	10.4157	3.58519	20.6846	7.88539	9.51451	6.58728	6.34259	13.9316	13.574	11.7045	27.6455	14.6682	7.20934	10.2847	5.39054	11.7456	12.9525	31.0614	12.877
P13796	47.225	39.2182	30.9687	34.9727	38.6731	29.8815	44.6466	26.6635	43.4018	35.8227	46.0891	35.0317	34.518	49.3554	30.8824	54.3292	37.8703	37.6817	38.9765	34.5258	38.3594	50.3987	29.7808	31.619	38.7007	37.8932	54.5347	45.8949	65.4564	31.8446	44.6993	46.8558	24.3108	39.6748	34.3276	39.2496	40.6294	54.751	32.234
P13987	14.7796	13.9281	7.50002	6.74526	9.72238	16.5011	6.40036	10.339	8.14095	8.30829	12.4907	9.00915	2.90053	18.5168	8.48764	5.30355	2.54702	2.522	10.2542	7.9992	1.96134	6.26874	4.74678	3.23752	7.68245	11.6412	2.73221	2.6746	6.49497	3.78773	3.43053	6.9556	2.59729	6.07966	8.34209	5.69573	17.0335	5.47809	2.12255
P14151	50.3356	87.3823	72.1053	61.1535	81.295	66.583	49.4213	48.4886	58.9187	101.378	80.6267	59.4497	59.7162	102.046	64.5933	68.1479	79.9496	68.0762	65.2291	76.7137	69.7244	119.87	80.7343	75.5595	81.5524	85.2771	97.907	143.521	82.9117	105.74	97.6031	104.634	70.9411	68.3738	43.5498	65.1735	109.507	113.774	52.3231
P14209	14.3642	12.2796	10.8669	15.2649	14.2145	9.66687	30.0468	45.849	25.5558	11.528	23.4521	15.6838	15.6917	19.5944	7.60618	15.4517	10.9881	6.92588	12.7822	14.2961	22.7916	16.0692	9.30285	4.49981	16.7422	11.7961	14.0969	15.7976	39.0634	22.509	21.1309	11.6021	7.614	14.5932	11.0155	24.3001	23.8548	20.4129	17.8725
P14543	18.7622	12.5277	18.6309	12.9633	9.66397	14.3518	14.7197	27.7554	12.3747	19.3305	12.1359	17.0819	9.89409	19.9244	15.7862	15.177	17.3494	9.87551	13.2391	15.3407	20.5991	15.9243	11.4852	15.8564	15.2341	11.637	8.47246	24.3027	13.2188	12.7066	20.2084	18.2602	16.34	12.4602	23.9543	17.7185	9.56475	16.0076	16.8612
P14618	7.38284	19.9629	5.11792	4.77102	6.8923	12.494	10.5619	9.10973	2.88082	11.4996	5.40453	12.2709	4.44573	10.8733	11.4359	9.90762	3.62559	8.1294	2.96202	38.3636	9.82418	12.5177	8.07265	18.4326	6.11719	26.5084	9.04651	9.79446	32.0706	8.85875	8.50603	9.66656	5.94329	5.16277	9.34981	5.71082	6.17484	11.8018	11.928
P14625	32.8842	26.0347	22.866	6.98473	19.4598	20.0119	24.5486	13.418	13.4417	21.8558	13.4399	23.7742	15.4919	32.9053	15.3062	39.6164	12.8916	14.1689	19.3096	21.9372	7.54335	24.0786	21.7931	26.0689	27.1708	27.7585	4.89918	31.5041	19.7223	12.2868	18.8456	17.9021	18.2939	13.4897	13.5216	24.6871	23.9639	24.893	9.4592
P15144	2.62615	3.00581	3.14049	1.34715	23.6097	4.50604	4.41569	4.16253	3.10334	4.52853	4.58765	4.46942	4.50979	3.10334	3.18567	3.10334	1.48309	3.00581	3.03275	3.10334	6.28091	8.3893	1.61903	5.56945	6.19579	4.58765	4.64601	6.03063	7.21117	2.51284	6.16335	3.20518	5.80324	8.93648	8.6794	7.60777	6.47126	3.63182	10.0761
P15169	541.171	528.309	845.98	582.137	585.914	530.635	511.654	727.15	611.386	689.426	600.597	635.393	575.399	546.861	638.832	674.816	507.237	756.404	646.056	692.626	689.085	401.872	606.179	613.775	533.284	649.232	659.241	593.818	977.726	655.957	583.236	571.518	629.717	824.766	630.858	434.569	396.039	667.112	579.991
P15814	30714.3	24626.4	24970.1	5736.19	20543.6	15024.5	40133.7	39835.2	28904.2	32221.9	23549.8	17797.8	20121	36116.3	21492	27772.3	24955.2	20147.4	12819.4	24878.3	24640.6	20218	33266.7	31136.7	22573.2	19156.8	26921.7	33161.8	27498	30481	42950.1	57761.5	28002.8	16405.4	1750.38	40204.3	19149.6	28863.8	48260.4
P16070	124.345	52.234	58.74	62.3769	80.5534	44.543	105.069	103.69	82.0863	83.5736	101.689	86.4818	70.9826	101.956	58.6609	88.1839	60.7201	58.6983	72.7786	76.0018	85.0325	73.5158	85.7751	59.3528	100.323	91.0363	94.4253	99.2475	35.9434	73.0758	94.7274	64.8977	73.5669	45.0634	88.4841	86.7729	99.4882	100.685	49.0703
P17936	85.0063	108.977	86.486	120.652	43.8264	31.0566	79.0955	91.1238	93.4333	138.396	90.8457	81.4239	80.0256	105.566	106.053	98.2608	93.9428	107.436	116.779	107.819	109.534	83.1397	118.711	69.5238	63.2256	82.9491	86.3281	97.1151	70.5071	83.5408	56.4938	72.8323	93.5576	91.7827	82.1443	68.3027	51.9798	73.1175	99.082
P18065	9.22888	13.7704	19.7837	18.6898	37.6104	43.6333	12.8594	31.8733	44.4306	30.4175	57.089	28.1109	16.3831	35.4315	9.83132	11.1442	24.213	18.4533	25.9729	18.8808	15.4781	54.9667	10.067	14.3457	27.9377	65.259	16.503	22.7225	21.1699	35.848	34.3118	21.227	15.7999	23.0476	28.0255	50.706	30.3335	56.3531	18.6075
P18206	3.55366	9.132	7.07207	8.06265	7.17675	7.39213	14.5424	9.8876	13.8523	5.56463	10.6276	4.98287	10.1559	8.29629	6.72823	8.38164	7.47696	7.00309	7.74726	14.6771	7.3308	36.4939	4.54465	9.20212	5.22996	9.83329	8.87309	8.52558	8.64777	2.83647	9.01909	17.2599	7.25905	12.7184	2.48247	9.28214	12.883	8.44021	3.00889
P18428	125.711	159.303	251.02	219.62	476.295	496.975	252.921	153.889	265.718	334.329	173.944	176.771	178.189	138.453	222.614	220.715	156.725	270.636	276.834	108.71	112.673	173.871	146.124	294.678	256.956	90.4618	194.491	159.285	235.029	170.004	193.488	149.624	148.977	319.306	291.715	368.462	199.615	236.528	181.783
P19012	153.01	165.976	225.734	146.718	94.3764	147.121	164.318	163.686	139.478	106.753	169.221	115.802	113.213	153.25	139.915	167.459	149.703	110.433	130.047	196.642	64.0621	78.6754	145.229	109.618	122.365	191.754	146.157	163.704	186.512	158.395	105.426	136.009	127.4	137.831	151.541	104.155	155.382	178.151	238.554
P19021	30.6053	277.816	226.653	318.962	60.2654	176.651	17.0119	62.9774	305.588	387.604	276.986	128.843	54.0842	146.054	121.614	356.522	290.518	164.487	182.722	248.97	30.9413	40.0101	249.216	51.3472	14.3991	1219.12	17.2739	29.3664	148.084	37.2057	30.4502	33.9127	48.3619	16.2418	43.4386	46.9446	27.8809	31.2515	26.6992
P19320	58.2372	41.2122	24.0074	36.8211	42.3646	43.6639	43.2599	40.4498	73.3055	31.2557	75.9576	43.8524	41.1447	53.5988	30.4301	51.2393	27.3876	38.4959	46.4927	57.144	33.7956	84.1211	37.1088	31.3328	51.1204	63.6919	46.588	52.5514	43.9301	35.0299	38.6701	49.1517	38.2513	26.7445	52.7249	50.3106	45.265	62.8506	25.7295
P19652	23435.3	19091.4	27441	19898.8	22683.1	21564.8	19434	20728	21610	13109.8	19292.2	21396.5	22526.4	17834.8	22125.7	14775.8	26801.6	26529.1	26042.7	23116.9	25088.4	23384.1	23041	28312.6	21475.4	7472.12	21310.7	23480.2	1841.56	20875.4	22128.9	21139.7	21252.7	24049.2	18531.5	17456.3	18590.3	15870.3	24588.3
P19823	10671.8	12614.7	11914.5	11704.6	6500.65	11652.6	9564.3	13724.5	12018.7	13410.7	13089.7	12380.4	11943.5	11833.9	12839.9	13460.1	13749.8	11119.6	12969.6	12155.8	11320.1	8778.55	13185.4	9744.08	8101.01	14201	10877.1	11433.1	10054.8	11521.7	10065.3	13237.3	11070.1	15122.4	8775.04	10430.6	10915	8867.84	13102.8
P19827	5021.18	8344.44	8882.73	8458.59	3535.75	5065.91	5719.85	8575.38	6541.52	6869.71	10012.8	6895.83	7977.4	6612.63	8127.9	6830.31	8783.9	7322.79	6419.25	9104.56	6571.39	3728.76	9142.15	5535.55	4738.11	7142.32	6015.22	6534.56	4731.11	5992.93	4685.42	6548.31	6498.75	6870.51	3577.16	5042.6	5375.66	2714.56	6840.47
P20042	2.56102	12.3662	2.44271	1.37218	2.60759	5.93596	2.11433	14.4967	17.5833	23.2708	2.42861	2.5421	4.4049	22.2407	2.43918	44.113	17.3192	12.3662	12.3662	17.5833	2.15029	2.88984	1.55104	2.84027	3.49621	22.9274	2.6735	0.987109	1.98427	1.87932	69.2849	2.60742	2.69136	2.86921	2.60759	10.9999	11.7275	10.6986	3.06909
P20701	86.9818	124.048	116.449	78.2787	145.872	187.687	86.8504	100.102	108.502	158.347	56.5164	94.5372	116.288	116.605	99.407	131.992	161.852	132.447	134.146	81.7888	55.6929	62.9699	116.713	109.303	78.6082	163.258	106.02	66.018	192.962	83.956	108.545	82.4268	64.4659	28.8638	115.863	60.4834	52.8997	73.9761	57.4944
P20718	63.2627	55.4552	75.1003	37.8303	48.0712	90.0039	43.2471	54.0682	48.5839	63.9293	51.8647	65.1158	38.9075	39.9823	53.9911	16.0598	97.1491	112.537	65.3977	61.3839	47.2136	74.4002	53.2894	127.61	54.9773	61.3968	60.0302	60.605	74.2478	37.4404	42.7615	60.4323	58.7914	48.3863	40.1166	60.4323	29.1899	43.3127	47.2075
P20742	51.3751	28.7517	70.0928	58.8756	54.162	74.5956	92.4926	156.922	52.1733	67.8247	174.267	252.486	272.193	63.8106	115.768	299.805	782.312	460.481	99.0182	172.284	263.166	254.563	33.8739	148.797	196.133	33.8879	436.086	671.271	392.529	426.903	176.06	609.44	348.208	902.537	187.791	89.6902	75.029	71.3308	59.7212
P20851	568.315	569.616	747.934	650.06	405.23	594.591	447.589	586.576	449.353	601.663	633.74	585.768	516.451	558.388	617.77	510.376	548.634	758.829	709.744	689.068	581.699	450.391	618.366	554.328	515.922	389.376	603.768	592.064	239.677	897.381	450.45	439.073	660.975	752.225	713.975	408.236	554.433	528.424	822.081
P21333	13.0644	8.92909	12.5624	12.2245	12.8942	9.46243	15.1829	6.02717	10.6326	10.4736	13.9023	10.592	11.0481	12.7271	7.30366	14.8773	9.10758	16.5528	8.99496	11.7949	13.7033	10.5596	6.26664	11.0152	16.3992	7.0889	10.0255	30.805	13.2877	15.7788	39.0892	4.39259	18.3805	10.4052	14.9673	17.6535	18.3425	19.899	17.6535
P22105	18.4091	8.81121	15.1072	14.1056	10.6043	3.867	23.3393	10.4495	15.4601	6.33337	31.1717	11.4568	9.59982	17.9355	19.3915	19.6021	19.2915	7.6184	13.2594	11.1015	10.4858	11.862	13.7271	9.40808	4.76074	14.3389	13.4387	18.311	15.5821	7.58728	11.895	6.37038	23.1612	7.91056	7.36559	25.7434	10.7104	13.6364	14.1164
P22352	475.166	558.606	522.449	627.059	453.762	1244.33	298.995	761.346	658.983	799.429	388.354	372.759	418.965	660.199	426.845	495.519	511.273	439.096	531.63	320.694	432.766	376.724	568.292	357.582	376.582	467.111	446.784	390.413	432.873	560.644	513.3	436.299	324.96	607.756	742.219	596.546	704.914	1300.65	465.173
P22692	7.5303	11.3737	9.44274	14.6341	6.38526	7.83313	32.895	8.49375	19.5136	12.1993	16.6973	10.2144	5.6111	6.00091	12.2616	10.081	3.90048	11.6087	15.6391	6.32101	10.5691	13.7623	9.27112	11.9536	8.91045	16.0126	12.1976	16.5908	14.3375	15.9684	16.2373	3.5555	14.8208	13.5682	4.4262	12.106	14.0578	10.966	11.0247
P22792	1171.36	949.947	1627.24	1079.65	1095.76	970.386	1287.94	1203.76	1182.26	1328.65	1164.01	1066.96	1104.05	979.481	1167.97	1290.57	933.241	1515.44	1420.65	1178.92	1350.19	739.728	1206.69	1055.82	988.496	1271.7	1382.68	1357.24	1261.81	1427.53	1131.57	1302.28	1374.54	1581.67	1082.42	968.707	862.981	1372.71	1329.88
P22891	37.0748	30.8402	73.9595	49.3029	25.4789	66.0291	35.0142	35.7695	20.0411	30.2767	44.57	22.0614	23.6173	42.5608	30.5812	42.6563	51.1891	39.7085	41.5971	46.0165	12.0516	19.0757	43.9323	26.3103	24.0302	57.6863	25.9212	35.0348	33.7392	20.4279	33.3929	33.575	14.6066	32.5964	41.5407	11.48	41.8016	25.3324	55.6496
P23142	174.532	227.108	158.612	275.415	171.184	202.328	254.063	221.244	379.482	416.732	437.638	256.416	280.857	252.41	205.199	353.523	192.25	207.328	217.818	188.499	212.791	235.126	203.072	172.427	234.368	424.693	186.007	195.612	129.721	257.244	236.838	233.302	246.996	178.096	231.185	322.921	286.25	298.759	148.387
P23470	14.8526	11.8439	5.56706	5.76557	7.93095	9.69078	10.441	4.97194	11.8025	11.3337	22.3886	10.0051	7.50202	12.2939	5.32794	12.5921	8.36038	9.73975	11.288	12.5921	12.8588	12.851	19.4939	9.60653	8.78444	18.0322	11.589	10.8523	12.6163	8.32332	13.353	8.70762	10.1417	8.96748	5.75953	11.2008	7.14393	10.1086	11.4175
P23528	3.6001	49.1509	2.99126	22.0663	11.4115	22.3354	38.0412	16.2204	2.08381	33.7646	6.84354	19.6225	29.2692	11.8304	18.9886	19.1631	13.3465	31.7232	20.613	74.2833	14.0671	12.6798	21.8848	59.3133	2.79873	113.582	35.8283	35.8283	234.713	38.445	26.0541	28.7554	29.0579	26.7866	42.3586	33.6515	21.596	16.014	28.7554
P24592	25.8744	19.7298	16.2247	18.2054	12.9991	14.2267	33.476	26.4007	18.6514	22.7117	19.5297	7.56737	6.22176	27.1488	15.1047	17.058	7.88324	11.5651	23.5421	19.5993	6.53668	16.4003	18.1446	16.2471	33.1022	11.9133	15.736	10.8407	17.3373	8.7647	10.2743	6.3531	20.0905	5.37867	11.5341	22.9818	38.6689	13.0841	12.8916
P24593	5.72676	37.81	31.1104	38.0017	11.2793	12.5987	28.9647	31.3996	23.6251	35.9348	28.3032	28.5517	24.9895	57.7306	40.2538	29.8128	26.6661	24.8344	48.5547	30.5202	14.9483	18.0538	18.9111	18.8399	27.8043	23.7233	6.50652	33.1036	24.8807	37.7131	28.5179	31.8942	22.4909	23.4432	21.3191	39.2672	26.2257	25.2601	40.8427
P24821	15.8732	8.35862	19.4438	13.7717	29.6043	27.4958	15.5263	19.3444	19.3729	22.3506	45.0258	15.8874	17.7324	15.3613	15.0451	21.7528	14.6676	14.7453	18.3306	18.4994	18.2183	14.7637	12.1648	27.3675	14.7836	10.7226	9.20207	12.5443	19.3397	14.6454	14.0719	15.0714	17.4532	13.529	13.2297	15.3146	17.4996	12.7381	8.46518
P25311	838.155	208.287	184.82	190.281	449.433	291.132	541.837	216.861	183.958	337.347	261.333	409.703	378.639	247.489	331.156	199.198	228.512	242.492	284.181	199.837	498.563	617.574	272.27	736.08	642.105	314.754	699.81	638.766	2164.03	676.501	929.845	558.829	666.038	694.618	674.771	808.077	742.849	653.502	712.055
P26447	14.3828	8.1217	7.73771	9.62173	18.8541	11.6091	15.582	8.83928	7.63405	9.15006	7.81186	10.2917	12.9996	6.03642	9.62173	9.51086	10.6578	5.52074	18.8949	31.3098	11.5469	22.3536	7.83354	13.7338	12.6696	12.3	9.77056	11.7576	10.6391	11.7275	9.56065	13.1747	18.8775	12.4549	5.42854	13.0234	13.2813	11.3445	12.7774
P26927	73.4419	111.527	139.139	122.918	121.704	128.022	121.442	124.285	127.073	100.493	55.2012	104.556	109.077	117.144	116.131	127.039	121.183	103.131	118.584	86.2713	79.3156	97.068	120.804	118.994	116.551	115.127	121.314	130.756	112.1	99.69	122.61	104.037	98.5486	141.579	191.502	79.6673	127.53	78.1619	148.356
P27169	3452.79	2418.62	3328.49	4794.4	1992.65	3955.5	2955.72	2501.79	3559.29	4695.55	2887.48	3706.8	3611.35	4376.22	2848.68	4697.08	3282.82	3286.99	3964.57	2380.15	4192.25	2521.15	4435.83	2495.75	2538.88	4381.79	2668.98	2973.26	336.346	3156.84	4353.88	4690.24	2728.82	3681.27	2897.17	3230.65	2729.23	3044.14	3991.44
P27918	395.349	332.614	414.367	322.114	247.111	381.613	321.471	399.489	213.592	436.59	568.52	266.616	271.307	362.02	315.98	429.12	348.62	473.943	416.872	504.787	364.337	336.006	472.466	292.247	292.423	333.736	397.424	326.533	367.566	402.941	234.285	281.339	301.114	306.478	400.96	250	320.495	255.751	336.131
P29401	9.42585	43.6285	3.43568	12.9473	11.191	16.2615	9.4043	14.0146	15.5744	5.31355	3.68401	6.95626	11.4733	18.2136	13.4261	7.03228	23.3012	15.3253	12.9473	32.0491	6.21535	5.41192	15.3253	14.0879	8.65362	24.3305	2.10257	15.9832	29.8677	3.10368	9.75603	27.9543	12.4836	14.0021	32.9245	12.595	9.03201	6.71219	11.5317
P29622	941.564	1112.48	1197.34	1293.05	774.609	1369.32	824.898	943.258	1120.17	1288.56	822.034	910.945	932.348	927.44	1251.95	1184.51	1165.95	902.01	1367.09	1108.96	1001.91	1131.46	1419.16	691.958	850.529	1173.17	1036.02	912.916	181.778	1044.72	828.242	1082.03	1116.04	1260.49	985.381	960.271	1057.12	1083.52	1291.5
P30043	10.4179	6.21881	4.92441	4.8034	5.5757	7.71644	11.7515	7.12426	2.32142	7.96798	2.00272	7.95855	7.19509	12.544	4.61685	6.24487	6.93383	1.93823	2.12487	4.44496	17.5825	20.8715	4.80961	2.1605	3.19087	3.51787	7.54157	9.26615	4.88424	0.864173	15.1953	8.96502	17.0604	2.31269	2.36298	8.10909	11.0413	9.63938	8.52439
P30101	4.19011	23.4594	8.15849	22.4461	9.56239	5.20798	9.06509	10.4494	2.59035	9.85043	3.22076	5.35055	10.5682	13.1259	11.1376	10.4494	18.2258	11.4134	12.5271	16.8941	5.58533	11.125	11.4134	14.5607	12.8929	13.8716	10.363	7.49978	111.289	10.571	11.2955	10.6723	9.84317	12.2299	17.6147	19.1612	9.28641	8.67355	7.9499
P31946	34.6557	202.173	98.1233	31.6231	62.5369	120.717	66.4127	33.3577	100.941	99.1528	89.6575	60.339	59.5549	358.373	11.6978	76.8328	55.3624	33.0482	70.8614	231.251	86.8644	171.356	49.7571	106.783	37.8478	81.9256	26.2655	36.4442	68.4776	73.6391	68.9787	110.471	27.6991	79.036	40.5839	64.3228	91.821	46.5869	105.852
P32119	18.2083	58.7179	18.8657	31.9236	39.9897	91.0776	33.4011	22.9304	22.9023	37.6462	17.9227	27.1167	31.3626	68.2555	24.0801	58.3342	24.103	18.8641	30.3597	60.5159	49.3752	158.181	48.0956	19.5941	65.3273	31.4504	20.1914	10.5612	29.1418	24.1106	52.0639	40.181	103.605	66.8498	48.0586	33.1138	75.782	39.429	48.7492
P33151	64.9826	124.298	46.6409	51.6319	65.0127	53.9546	67.0039	76.2085	121.935	65.5222	183.842	47.0533	48.2121	90.971	66.3301	59.3131	74.6592	70.7125	72.3089	92.4113	65.6691	56.8439	54.1581	65.6837	74.0167	169.786	48.2643	87.4613	152.985	92.405	63.6105	61.4095	60.5455	58.5395	70.2728	67.1129	58.0935	59.0259	42.6584
P33908	37.889	23.8959	44.1715	26.5705	41.367	58.3333	42.7107	22.9187	26.2454	44.617	49.456	40.1757	37.0351	62.6567	33.1357	41.3079	29.5021	46.3309	49.3429	57.1027	30.3184	40.1411	43.9667	42.4663	41.3301	43.2847	25.3609	38.9623	38.7652	45.8561	37.1723	47.7052	32.5316	33.692	32.1469	42.3347	30.7395	24.9036	45.269
P34096	13.7053	13.8684	18.6889	21.048	22.4664	11.5706	27.8743	28.0457	15.4319	20.7266	11.592	14.6488	18.4811	10.7149	16.2957	21.1656	2.08153	11.3919	19.1434	11.1688	22.5485	14.2209	7.23976	7.84648	21.0992	13.1672	26.8108	17.6955	25.321	13.6864	20.5299	18.6535	11.4464	21.1612	22.8768	17.0675	28.0348	17.2557	13.308
P35443	34.3485	38.9968	18.8062	30.7188	20.1806	15.8648	35.1222	36.7071	61.634	31.4253	136.853	34.0798	32.6204	36.0598	36.078	45.2436	27.9942	22.7693	12.8411	50.9746	33.242	19.3004	32.5058	17.082	30.2238	75.8512	41.1368	35.2054	41.593	38.3934	34.6707	42.4815	31.1616	39.7283	55.4601	46.9606	34.2825	11.6245	29.4503
P35527	216.206	33.5885	51.8722	284.873	46.2573	397.799	29.9434	125.044	83.7807	118.794	65.0864	41.1619	39.7936	71.2072	296.217	218.263	118.809	30.6822	39.2296	9073.24	150.414	124.097	96.945	52.7939	48.4247	36.884	91.9184	27.0177	2.3163	23.1093	44.9893	271.548	116.587	90.87	445.692	134.325	16.8924	121.232	25.1726
P35542	4599.4	4406.66	5393.12	5461.06	4504.77	5333.22	2952.03	8536.31	5296.86	6559.78	4497.89	4070.02	4420.13	6124.84	5697.82	3469.03	8424.3	5502.16	5038.27	3490.87	5136	3702.99	5615.78	6731.09	4102.54	3468.23	3782.48	3896.52	1317.73	4895.37	4295.94	3981.55	5418.36	5454.72	5226.05	4222.63	4482.21	4712.17	7278.14
P35579	5.35565	5.7295	4.36019	5.95401	2.27968	4.17662	5.49726	4.9042	6.49616	3.9546	0.358375	4.98084	4.58509	2.86056	6.15973	13.0274	1.05647	5.33181	5.13775	5.75763	3.86037	4.88259	4.49505	7.00939	5.53327	1.73859	3.84847	8.47477	4.79437	4.22735	5.2729	4.57846	4.18989	4.35681	1.51053	5.6202	5.22822	1.62316	5.6202
P35858	611.856	586.214	612.121	696.126	317.237	111.596	574.798	557.093	471.574	718.326	376.553	526.378	557.714	512.249	741.428	683.402	459.774	660.974	801.48	405.482	695.143	601.22	653.655	473.631	248.522	515.631	572.509	789.088	574.609	651.759	495.84	635.163	684.889	742.139	861.606	565.613	377.477	573.306	847.198
P35908	89.434	28.3633	14.7087	107.056	20.1611	1450.53	21.1715	20.5905	48.2169	99.5469	151.47	49.7845	41.4591	20.4689	245.894	75.6269	31.848	20.3735	19.0566	705.161	16.5038	653.866	29.1421	31.4885	30.0003	276.814	410.903	14.9928	95.4515	21.5778	21.2451	51.6423	152.724	103.383	52.5947	102.289	16.3891	93.9978	12.2984
P36955	1596.73	1553.98	1112.65	1475.37	1299.77	1412.53	1513.89	1433.44	1192.09	1771.16	1322.71	1032.4	939.353	1303.86	1290.65	1220.88	1143.81	1000.47	1360.91	1356.1	1068.81	1512.26	1384.27	1210.31	1755.4	1510.46	1166.62	1423.43	965.505	1279.02	1480.72	891.727	1397.35	1266.82	1030.32	1201.51	1518.79	870.029	1796.74
P36980	88.0435	36.0737	79.7421	217.565	295.59	69.2812	227.672	189.679	36.5745	40.8685	329.212	176.583	205.695	176.624	197.797	59.4413	171.706	68.7243	65.7027	148.073	305.889	90.571	80.9404	113.962	107.272	66.8716	113.079	178.808	117.926	87.4577	198.446	32.6657	109.033	212.28	191.53	79.9576	91.4878	128.572	176.478
P37802	109.563	14.414	28.8732	38.9897	24.5343	8.59544	15.8598	31.2605	18.9578	12.831	23.2341	34.6724	29.4696	22.4122	4.00789	8.42593	19.1099	34.9248	31.8904	14.6287	20.3386	19.2323	22.2695	32.8843	1971.13	65.5941	27.6527	22.6083	20.9045	16.9395	18.4675	11.2131	15.0036	29.1425	14.9685	33.65	20.9514	409.693	33.65
P37837	14.1165	11.2402	18.0925	8.10894	14.3434	10.2594	16.2175	20.1607	14.3963	16.5045	3.06055	32.7578	19.6394	16.6459	8.79898	7.53737	23.8683	14.35	9.58916	20.1584	10.6172	2.51223	23.1485	15.2113	14.4019	10.3318	15.6339	7.37177	12.9376	18.3425	8.59447	10.4537	9.68703	10.5234	10.092	16.0852	9.45864	12.1035	10.5255
P37840	24.1908	4.70189	13.4808	8.95559	14.6619	3.95732	31.1351	8.38004	10.3334	25.4157	7.31691	11.1072	9.65082	1.45741	13.4808	1.56486	8.22435	20.1	8.78179	11.956	31.1351	17.4206	8.76035	14.6338	37.9621	12.7616	20.9451	51.1307	20.732	15.4108	31.1449	26.1482	11.1688	15.1639	4.70569	23.6517	41.1329	40.076	26.4518
P39060	13.2891	7.7933	9.32478	4.44516	10.5515	12.1645	17.9496	19.58	14.676	11.5543	17.5684	17.4431	11.7017	4.54541	8.65166	15.5392	15.2143	11.6175	11.8128	10.5796	8.64892	3.71517	8.40639	11.9577	8.5794	9.85099	7.27417	12.6609	11.4431	14.7159	23.1161	28.4986	15.6713	9.63556	10.089	16.8049	13.6348	14.6196	10.1331
P40197	28.7362	27.8787	27.8504	36.2729	20.2638	4.54282	35.4595	18.2779	21.1023	21.2047	25.5144	37.6522	31.5126	39.7097	27.8078	25.0289	34.8508	28.347	34.0553	23.642	19.4443	21.3489	34.2507	23.0831	29.902	20.4685	36.6553	27.8392	78.3625	25.3147	30.2395	22.0744	33.4708	26.3479	25.5139	22.9059	32.7313	32.4884	44.28
P41222	48.1909	36.3767	39.9409	35.7204	19.8459	13.8596	38.6471	40.5598	39.9694	27.0108	71.9728	24.5876	26.598	20.5845	23.0427	27.1022	29.4941	29.3735	48.7051	38.3331	20.2213	22.8054	18.9055	24.9454	94.8412	37.1581	39.3663	48.9841	35.146	36.1263	47.6539	20.195	32.491	22.9396	24.1025	54.8822	42.7251	41.0368	21.6081
P43251	182.585	203.491	196.75	278.359	151.973	153.478	127.954	202.614	163.835	190.344	60.6799	161.523	159.282	189.962	180.258	219.857	215.344	163.998	194.56	181.232	196.087	135.455	225.008	151.545	158.034	164.225	171.515	194.684	256.939	121.677	191.824	160.779	193.14	223.274	172.974	139.618	174.92	205.765	275.192
P43652	2757.17	4031.9	2832.58	3020.79	2390.26	3187.32	2592.91	2738.5	2637.5	4235.37	1826.02	1991.06	1970.83	2551.09	2927.57	2855.29	2953.66	3219.4	3072.09	3048.38	1360.32	2424.61	3269.84	1729.07	2982.86	3098.42	2330.57	2778.23	3178.54	2689.67	2022.68	3231.93	2961.43	4488.7	2000.99	2232.26	3400.83	3044.84	3269.13
P48740	579.92	644.183	603.617	735.309	653.658	645.316	646.979	567.778	460.791	543.367	676.029	542.448	573.122	625.964	533.802	680.711	437.043	295.216	669.344	421.288	604.556	729.87	667.071	692.129	679.995	746.879	638.588	576.777	656.087	545.217	602.293	450.692	570.652	562.119	485.294	581.029	611.108	571.869	757.958
P49747	52.6029	114.069	58.3514	108.799	63.6527	42.371	93.5633	114.535	118.111	81.41	225.388	109.611	117.147	107.376	102.955	138.988	78.5644	78.5643	80.1455	89.9082	89.6381	83.6374	80.3976	94.2341	90.3109	90.2402	97.372	87.9412	62.8965	86.1978	65.5669	78.6855	70.2886	63.9749	102.732	93.7373	101.486	98.0183	70.6484
P49757	237.055	105.234	57.0645	92.9653	58.4311	207.335	192.543	111.509	153.383	34.1756	141.746	147.253	132.092	213.869	62.7956	118.667	83.69	78.4096	128.965	168.096	165.962	338.998	70.6253	176.483	407.418	53.1796	119.737	182.079	279.844	265.296	151.266	330.596	94.842	84.2489	171.447	175.513	100.717	352.793	88.7863
P49908	515.347	575.143	453.769	555.936	300.666	549.489	432.012	624.865	428.015	417.232	440.391	297.462	323.817	579.926	404.579	407.759	429.205	486.753	421.845	257.282	322.31	309.377	467.184	312.476	341.905	603.92	382.152	322.541	412.39	417.321	410.36	251.072	346.274	416.626	460.078	323.001	608.155	320.677	505.805
P49913	130.768	26.9426	74.7676	53.6771	81.2752	43.4761	106.691	44.5981	34.2315	59.4516	41.3936	21.4391	21.0546	54.54	66.6869	37.0411	37.1047	52.0003	75.819	78.9835	62.2522	64.2385	52.5076	75.9859	123.099	62.698	53.4884	86.7076	64.368	64.1686	72.6902	46.7385	76.6551	52.5186	87.6454	38.0801	138.643	23.5042	110.352
P51149	390.032	150.415	215.867	237.574	439.131	286.308	527.19	171.459	208.706	210.72	183.174	258.621	260.495	101.439	167.742	267.509	182.939	214.947	364.999	207.337	381.184	407.181	236.679	508.292	182.321	274.141	416.05	391.19	351.87	257.662	529.414	369.476	421.403	251.288	219.814	311.33	408.187	407.926	589.848
P51884	729.583	867.608	596.956	743.443	458.358	492.299	759.047	799.842	1002.68	878.658	1640.96	687.714	709.312	841.397	659.775	784.804	664.882	690.006	743.454	769.015	728.526	689.069	759.212	368.446	707.59	1168.27	617.492	570.723	545.252	711.817	771.436	518.63	772.07	692.674	499.931	850.207	770.611	573.89	453.584
P53367	477.32	232.835	277.163	204.232	232.732	285.018	434.809	126.076	235.179	238.714	107.564	323.45	192.75	140.811	239.095	136.513	187.151	221.442	109.063	238.294	303.043	245.429	169.841	298.961	316.552	151.021	324.407	466.667	107.123	396.393	376.809	457.858	274.282	326.389	240.056	411.313	390.501	272.354	512.526
P54108	64.3834	24.052	17.6008	25.9598	65.4284	16.2277	56.672	40.1822	64.4896	36.0355	20.4154	42.0671	65.9791	44.6476	20.3534	25.5032	24.1913	23.6434	31.512	29.3109	70.7427	62.1461	50.6127	63.4907	105.537	66.9813	81.4985	123.059	56.062	64.8634	48.9056	62.1451	68.2764	63.6477	97.7331	58.495	107.668	125.794	50.4156
P55056	1096.24	694.84	851.828	405.873	231.639	342.009	1148.76	413.362	156.654	519.543	405.406	371.875	407.693	607.88	1246.17	235.12	803.117	614.519	1191.72	825.063	793.655	649.795	1028.21	817.51	708.126	396.734	440.11	582.996	341.072	313.767	274.59	702.456	1346.67	326.907	427.588	159.303	778.801	334.285	1399.85
P55058	348.746	432.87	414.836	302.259	420.063	406.184	331.421	533.806	434.186	392.152	452.764	362.991	402.685	477.236	327.929	424.031	384.672	340.527	335.237	356.328	481.954	459.348	491.179	282.773	316.667	554.36	379.468	344.574	512.581	395.24	476.455	355.995	384.093	308.102	441.741	447.764	324.112	556.797	332.485
P55103	16.8697	30.9997	24.6372	21.2926	23.6204	25.424	31.2233	12.3972	17.6533	25.9415	20.534	7.0761	10.3992	32.1817	14.3477	47.4752	16.6516	21.0073	15.15	23.6703	11.9811	11.5987	20.802	17.7757	22.0926	24.4609	24.3925	34.3687	23.939	21.4749	14.2321	21.4873	32.697	31.703	36.7642	23.8731	18.1387	11.2187	29.7576
P55290	27.0192	23.0401	19.3061	23.902	14.2506	12.9789	15.0324	20.2435	20.8041	32.1781	31.7174	20.2852	20.2365	40.977	21.7198	33.6787	19.7495	13.5185	51.7752	34.7579	27.4694	17.3983	33.5463	21.9289	15.4409	45.4914	21.4011	27.2214	16.6439	29.4991	21.7346	36.1786	23.8198	9.75988	39.7496	32.9702	23.0647	45.0493	20.6677
P58335	23.5944	27.2042	22.2735	20.6882	19.9307	24.7219	12.9511	27.2288	19.5928	18.2671	28.3398	23.628	26.3613	61.0466	14.8949	5.13757	22.7996	17.3881	14.885	8.61317	4.80031	7.06494	33.1716	11.7691	6.39848	6.3509	18.2904	19.8079	20.817	21.3654	25.6242	17.5167	4.82477	8.4486	40.0837	17.5208	10.6856	13.6375	13.4642
P59665;P59666	130.817	82.687	22.7638	24.4742	392.963	26.3807	262.73	25.9356	31.6913	8.66789	21.8167	45.1226	38.1103	29.8501	19.8758	10.9661	10.4411	8.07015	18.3184	16.7497	111.87	881.68	15.637	99.8037	165.816	24.8444	157.113	342.5	106.775	111.943	102.886	114.244	94.4452	155.847	102.761	57.577	160.971	511.047	199.515
P60709	244.142	510.684	366.119	222.553	363.583	216.959	311.057	222.439	201.619	238.06	464.659	190.63	170.59	443.319	145.018	267.492	294.258	239.485	213.055	376.165	171.456	604.279	206.391	167.415	191.396	226.59	305.137	259.124	685.259	202.148	118.203	163.303	159.635	143.556	264.614	220.534	208.625	426.759	192.945
P61224;P62834	4.79702	5.38294	8.52485	9.02677	6.47719	7.80775	50.9001	7.60104	8.39943	6.69697	3.58786	6.93289	7.4342	12.2343	6.2947	8.7618	8.24261	6.44877	6.9555	5.41458	49.6736	10.0714	6.93459	5.63711	73.2316	7.48803	4.79702	4.79702	5.47419	137.832	137.832	4.79702	5.63711	73.9517	7.4342	4.79702	137.832	8.6313	71.3145
P61626	75.0127	72.2592	68.019	90.9711	87.7728	75.5121	126.015	70.3166	72.3859	77.1036	71.606	59.9685	70.5375	86.3087	53.9387	69.8263	37.7649	35.4411	101.656	78.7775	41.5088	95.5087	77.1181	41.1196	164.944	47.7001	53.2775	76.4681	119.848	57.2337	52.3732	31.5148	82.7327	43.6242	64.5493	76.593	111.972	64.6455	41.5683
P61769	117.313	115.765	106.656	85.4898	119.041	96.423	354.681	127.439	125.939	85.3783	167.633	95.3232	113.195	148.904	87.6076	144.143	88.254	64.7411	136.03	142.478	59.3437	175.202	103.75	71.6794	183.013	114.198	124.808	98.8828	74.3285	98.4795	212.106	85.6979	115.278	67.7622	144.82	155.541	141.905	90.3082	62.4566
P62328	40.0986	51.7633	278.103	195.762	52.9631	65.2592	71.8325	78.1198	38.5463	71.3954	161.472	24.8272	29.1623	203.787	60.2026	49.311	70.6167	212.341	46.4583	29.7147	5.08651	47.9575	26.7867	16.6892	34.3123	16.6056	121.388	117.72	312.127	14.8208	44.0799	12.9187	17.1203	18.8435	91.7318	16.9919	18.8401	76.7357	46.8549
P62736	2.13572	23.4665	6.1374	22.6411	1.53478	7.40933	5.40384	22.9823	15.2241	11.0078	10.8468	11.1982	13.0784	24.6918	15.3295	14.1779	9.36463	12.0097	13.1073	24.6422	4.85331	4.34599	5.9017	5.45319	3.45298	16.9015	2.74502	2.41071	112.984	4.56578	5.12497	3.36786	3.87351	5.89714	5.75751	19.9397	2.90517	14.9207	1.18481
P62805	28.1802	70.6322	30.0769	18.1646	24.9946	24.6187	45.225	17.9685	14.4282	17.5236	13.1624	18.4465	16.7519	30.7873	12.883	29.1963	20.8455	14.3794	21.3701	43.2455	21.3155	22.9591	14.7718	22.2985	25.0066	45.5662	12.368	39.6519	810.209	19.137	17.6002	20.6482	9.66828	15.1825	35.5803	27.7305	20.3617	93.1685	11.9904
P62913	52122.1	27785.9	35535.5	29811.6	18326.3	29758.6	49616.7	55769.2	17186.7	51486.3	34899.8	23345.4	12575	52824.7	31721	46556	63529.6	32354.3	47160.4	26937.9	40483.6	32911.2	15759.4	25271.2	28385.2	70399	47923.6	39125.2	20206	37830.6	36044.6	43608.7	20287.7	27524.1	1096.13	43498.9	59412.3	53815.8	54561.2
P62937	18.1873	51.1	38.1018	28.0019	16.9813	18.9108	20.5369	23.5649	21.9398	21.223	28.1472	30.6656	15.6488	16.1097	32.3845	10.4713	14.3383	12.1891	25.7246	35.2073	20.052	14.268	25.4769	27.2475	14.0869	9.92674	9.97872	8.05112	21.779	17.1043	15.028	17.4719	14.8348	14.5084	6.21307	17.4719	14.876	14.8398	21.5451
P63104	6.68552	4.74957	5.92672	5.68907	7.35467	5.7412	3.56882	6.08664	5.81253	5.33003	6.35418	4.50254	5.82504	5.67495	4.84904	7.48786	6.53096	4.76706	5.80934	8.71286	5.21467	12.3975	5.64154	4.46943	3.853	1.8149	3.02682	3.23001	5.27389	3.02682	3.60261	3.60261	4.46943	5.82504	2.48481	3.63639	7.98316	5.72197	3.56882
P63313	67.6443	100.176	734.964	437.594	280.708	28.8656	329.376	128.207	44.8898	142.818	525.107	198.33	43.4301	3.77062	41.1441	147.184	114.019	407.827	124.485	29.8678	301.738	140.067	47.5142	256.956	250.752	15.9197	484.855	404.666	632.453	21.9129	258.978	230.675	256.956	204.481	188.013	54.0816	276.175	272.36	321.635
P68104;Q5VTE0	9.69871	12.0454	39.7896	15.8658	8.14493	12.3969	8.71861	7.99176	9.5192	5.82587	4.11598	3.12049	7.01589	11.856	10.3821	1.90174	7.32565	8.03455	11.8184	20.2251	8.9538	2.86421	8.13582	9.6245	9.1515	10.5413	2.35417	4.28453	12.3054	7.08444	5.56047	3.49124	6.91378	5.83795	9.36433	6.36196	5.21493	20.2178	6.73222
P68363	3.14324	21.956	7.5574	8.40621	4.8647	7.54708	8.30548	9.50943	9.56548	9.60287	7.24858	5.34588	6.80181	8.25426	7.25532	10.9264	8.95784	7.8728	2.49869	29.2139	8.594	9.33666	5.49474	11.37	6.52915	14.1978	7.27232	8.21476	205.638	12.6642	9.7113	13.1444	2.24716	8.13802	8.2473	11.9882	13.4747	0.180073	8.44392
P68371	5.25626	22.4491	6.30211	7.62519	4.96131	4.86864	1.60427	1.48013	2.53838	3.70561	2.32074	7.43311	4.02141	9.27465	3.04886	5.34698	2.63186	4.28878	6.35034	9.59982	8.07335	3.45711	3.13941	6.74336	5.98203	5.61841	4.62611	4.62611	6.22779	5.33039	4.83881	5.41931	4.62611	4.21683	4.90057	4.53463	4.37824	10.6799	5.41931
P68431;P84243;Q16695;Q5TEC6;Q6NXT2;Q71DI3	6.74735	2.73439	3.51649	1.18415	6.70286	6.48133	3.79097	12.063	5.03679	7.19182	4.42209	10.327	7.16348	1.70686	4.17816	2.80325	3.64294	4.20345	3.12881	4.4665	6.36691	7.3805	4.34358	5.18104	9.00159	4.65519	9.35496	5.05409	70.7326	5.05409	1.82528	5.05409	6.19701	6.04911	6.94061	5.05409	5.2277	17.1116	5.1182
P68871	2683.37	7032.76	3076.29	1817.43	5129.14	13679.1	5695.23	2865.33	3720.7	9178.33	2497.13	6057.2	5098.01	8235.69	3262.31	6156.74	4466.97	2702.7	4378.01	5331.54	8189.64	19278.8	7489.31	3271.36	7807.41	4967.03	2612.46	2171.67	1066.84	3172.17	10775.5	6121.39	16735.7	9678.35	4171.56	6527.23	13005.3	4266.97	8035.77
P69891	1390.72	745.995	915.29	80.974	816.729	2229.54	1991.45	761.032	801.331	2243.22	676.066	493.723	765.976	1936.6	595.972	2848.42	733.951	303.491	1055.18	1134.54	2033.67	7289.5	855.862	702.397	911.289	3504.11	1139.92	1014.65	359.7	931.632	4884.34	2625.54	3728.67	2081.93	1002.87	3752.68	5298.12	3659.92	3463.74
P69905	1336.92	4998.88	1930.65	1005.36	2674.73	6783.95	3673.17	1826.68	2162	4850.38	1684.91	3266.69	3666.92	5409.78	1993.49	4053.5	2368.92	1511.5	2470.31	3900.74	4672.28	11188.7	5456.33	1798.01	5041.25	3069.53	1425.72	1103.29	752.99	1811.96	5724.69	3067.48	10770.1	4911.72	3097.14	3612.56	8181.93	2665.89	4285.67
P78509	169.182	113.606	114.683	122.85	91.0616	134.509	172.453	114.403	84.6468	240.6	133.32	108.749	91.7778	133.534	195.838	145.743	163.157	140.823	185.474	69.7234	157.764	122.324	154.842	96.0945	170.171	78.3996	295.352	230.482	164.783	154.478	133.634	190.979	145.636	227.862	91.1251	181.502	183.662	158.757	151.297
P80108	251.534	249.516	336.324	390.259	213.236	340.697	209.244	242.642	263.733	249.641	224.279	158.294	178.031	179.519	254.711	151.854	157.679	235.609	207.388	204.39	188.053	158.443	274.605	158.198	248.316	454.379	187.657	175.717	115.721	181.253	254.289	207.368	182.681	236.129	92.9352	150.774	269.762	154.767	243.899
P80723	10.0858	11.3882	9.22233	11.308	10.2226	6.45577	10.3907	6.24578	7.97293	8.12336	14.3359	11.3281	7.44567	8.23264	6.84359	8.03495	7.71299	10.676	9.93518	9.25975	5.00139	10.1467	5.56664	10.7494	5.83896	1.64072	19.0763	8.77228	10.9241	8.31688	2.22206	8.3724	5.67417	9.68736	10.7342	8.11661	9.61049	18.1791	8.31688
P80748	460.503	547.757	819.012	512.777	1076.4	853.257	398.694	583.424	216.494	444.943	761.419	1037.56	703.68	375.453	990.629	560.368	783.175	901.847	1496.48	329.182	1012.11	657.842	665.641	833.443	1144.51	175.939	256.826	677.672	189.887	1170.3	960.969	1541.95	240.838	485.553	1489.05	10223.7	339.22	603.739	543.209
P81605	87.9143	35.9117	17.1176	34.4743	25.0525	129.521	57.7653	59.4677	53.677	42.7895	71.3857	26.419	40.5497	55.8986	62.4188	44.4482	166.41	33.9202	50.9966	1223.33	29.367	35.9968	68.1909	53.382	105.664	41.6337	85.3263	29.3615	41.5099	54.9103	49.1815	44.1924	46.4225	49.1284	102.744	56.8875	82.3577	96.8656	30.4854
Q01459	8.64043	13.3297	8.34791	8.91706	7.46228	7.85605	8.26213	9.69608	9.45324	9.96563	12.6276	7.51222	8.12618	8.16853	7.16051	8.78046	7.38695	8.32821	4.07106	10.1355	10.0281	4.83293	9.17109	3.49527	13.7627	10.9608	7.37847	9.02346	8.92475	2.62077	7.5496	7.76645	9.98985	7.01591	4.69865	7.40163	5.91644	8.10971	7.15438
Q01973	250.872	248.355	545.065	550.255	347.641	171.034	276.507	197.666	286.467	376.186	571.216	377.794	359.959	351.713	368.765	294.744	321.408	397.217	283.089	531.968	289.67	135.345	380.901	229.688	374.519	579.538	256.048	376.902	345.324	468.106	158.93	276.23	299.235	374.174	270.061	262.978	297.22	244.899	363.415
Q02985	397.073	453.806	975.283	648.826	768.1	708.735	639.747	530.824	812.155	621.249	638.397	450.339	500.752	368.408	564.008	625.199	523.095	421.137	362.487	205.616	324.526	493.063	433.535	429.979	587.333	422.526	419.216	637.545	163.073	366.364	613.062	583.959	486.245	580.755	371.333	425.947	455.674	191.804	516.276
Q03591	2094.96	2976.95	3267.46	3044.51	2828.15	2676.28	2619.06	1966.41	2522.12	2446.55	2311.71	2378.87	2163.52	2740.6	1783.29	2348.32	1888.65	2362.18	2272.78	1509.82	1866.15	1674.33	2128.5	2089.96	2206.83	2397.89	2061.87	2254.69	1293.75	1991.59	1950.2	1739.5	2155.31	2460.23	1246.32	1799.7	2060.14	1073.63	2667.24
Q04756	120.457	145.331	115.066	149.132	67.0064	149.547	122.896	159.675	148.158	168.175	180.559	132.996	130.612	196.046	157.821	173.671	198.565	133.024	186.277	157.733	109.218	167.402	179.665	111.934	158.653	131.856	181.748	141.659	236.314	158.529	130.431	149.979	173.032	152.567	63.8574	153.293	175.087	106.706	134.729
Q06033	449.576	427.073	472.394	452.139	1179.11	909.462	428.558	747.44	875.453	280.132	586.977	600.385	619.892	735.706	564.88	844.385	544.35	518.63	613.385	541.839	342.367	471.803	446.99	698.1	489.593	567.223	570.597	491.877	757.669	732.265	875.594	361.49	538.217	621.544	431.555	523.602	384.801	478.021	313.572
Q06830	12.2394	76.9187	22.145	16.7173	33.9668	82.2078	39.5315	20.6435	23.7997	43.8407	13.8383	39.0624	31.7722	54.1636	27.5919	38.3355	26.2495	20.6311	11.3795	205.29	53.1315	142.198	58.0122	18.911	52.6336	37.55	13.6047	36.9475	33.6674	12.4368	51.417	46.5222	107.258	44.7278	9.543	32.1639	76.5126	50.6968	38.2839
Q08257	23.3418	8.32609	19.3285	21.1731	17.3222	22.3356	59.7493	10.2514	24.7837	5.61568	17.293	25.8682	23.375	9.25931	16.6905	42.6381	23.8678	13.4972	20.7152	17.1469	11.9166	52.0485	18.2745	33.9696	21.5225	13.0234	23.3384	18.9361	23.3449	17.9462	27.1998	33.6452	26.7517	20.8041	14.8651	36.2623	24.8773	49.1401	18.127
Q08380	339.231	143.231	184.146	231.679	831.767	167.178	137.792	110.745	133.595	231.314	154.613	400.858	413.291	238.84	301.895	342.117	238.341	195.33	440.842	127.801	421.404	922.584	151.217	1167.32	999.801	93.7902	871.129	748.433	224.803	478.852	297.165	477.107	528.321	534.242	285.915	618.527	987.302	271.651	773.667
Q12805	92.4871	90.9219	79.9691	90.1601	114.154	149.43	131.313	95.0059	159.252	79.1536	205.264	84.3448	103.015	161.618	87.9873	141.313	88.6708	71.2288	109.859	117.296	83.6516	116.541	117.197	85.5881	140.9	131.491	115.823	103.381	39.7012	116.189	120.14	51.5243	95.6179	75.5289	104.659	154.609	138.378	118.149	67.5753
Q12907	37.4684	58.1379	25.8842	54.7434	50.5721	44.4601	38.5404	50.891	56.8295	47.1295	58.8279	50.2102	39.8952	49.3348	53.6971	35.1205	78.6367	36.2027	45.6819	45.4032	28.3549	70.6086	47.0517	31.1295	37.6778	62.2443	24.438	40.2017	43.8799	40.5081	52.9474	25.2605	42.5338	87.7555	8.88059	54.7528	59.0598	33.8057	35.5933
Q12913	9.4304	11.6548	19.4419	8.96402	16.6364	14.0073	16.3839	14.5531	15.4873	22.4887	15.6372	17.5752	13.0445	8.43287	14.5114	11.0284	24.7596	13.0609	18.5352	17.5581	6.50983	22.5963	17.7701	14.2463	6.83976	15.3164	4.71237	37.1358	16.6239	13.2219	16.0081	11.9375	13.2224	11.879	9.9386	14.0287	14.4768	67.6446	4.38331
Q13093	16.6683	13.9198	16.0077	7.80446	5.8042	14.8466	13.6876	12.4208	12.3066	9.18722	13.7107	21.582	18.2824	9.06301	14.9419	12.2558	13.4082	11.6247	11.951	12.7673	12.3095	14.393	16.8459	15.0286	9.39596	19.1245	15.5245	24.9237	14.6438	15.1723	17.0062	16.4056	16.6142	6.89773	18.0263	20.9685	14.9207	11.8804	15.224
Q13103	16.9937	40.3362	37.9839	42.5264	30.5312	22.9722	41.901	30.7353	32.4319	22.407	45.5817	36.5824	49.4043	35.6801	37.1496	57.8586	40.4477	48.6983	30.8533	48.5044	37.5637	30.7948	26.3911	28.1867	35.883	40.98	37.2665	37.3685	57.4311	45.369	21.4248	33.6673	34.1012	61.82	23.3785	16.7307	20.7538	35.3126	38.5903
Q13201	19.7796	28.469	30.4047	32.163	33.5624	16.1009	26.1685	20.765	30.0651	23.1464	25.4418	32.6885	29.0535	22.7172	18.5915	40.1122	25.6948	29.0301	28.5597	18.9528	31.9552	36.3552	42.9012	26.0192	34.2516	22.3281	37.1454	16.6056	28.3935	21.3377	14.0887	16.024	22.6269	34.7762	30.5067	24.3834	22.9441	52.2861	36.3222
Q13402	3683.15	4936.42	5574.67	3349.73	891.243	3736.53	4525.78	4218.09	4491.96	4538.74	3939.89	2582.56	4927.63	4438.82	3710.7	6336.64	3549.71	3254.74	3613.21	3254.16	1847.56	2330.4	5731.52	1455.09	4037.48	5064.39	3157.95	2978.2	3458.15	4431.06	5375.48	4348.58	3617.06	4550.73	3300.47	3976.89	5060.79	2993.88	2850.18
Q13740	7.5042	9.87542	9.81735	12.0682	10.7239	7.55566	11.6191	12.2389	11.9388	12.3793	13.4237	8.43686	12.0236	15.1144	9.95349	11.4309	12.3346	10.1378	7.87538	12.1523	13.4786	11.5139	10.3064	14.919	11.3685	11.667	11.1756	10.9528	11.4393	10.8571	17.0363	12.2789	12.884	14.1312	18.939	12.393	12.4601	15.4708	12.393
Q13790	1145.74	801.073	1349.47	1333.42	467.541	1197.83	1079.42	1656.56	1446.64	1126.02	864.356	1042.68	1154.75	1670.63	851.231	1676.94	1535.74	886.987	1956.98	836.883	1037.34	948.692	1342.1	1345.57	537.248	991.675	1466.77	944.046	3562.12	1273.17	1698.06	1229.1	732.098	1379.94	1283.68	1552.1	1455.34	1117.17	1114.34
Q13822	10.5809	3.31256	4.66893	6.62623	8.2898	12.5981	10.7708	5.07302	3.55778	11.3992	6.71493	4.72117	8.01782	5.94173	5.02637	11.4258	5.6426	5.05164	6.42951	4.93847	5.89657	10.4489	6.01254	9.25887	4.65075	5.5591	7.30103	16.3821	7.84201	7.87685	9.52979	9.8599	8.1916	8.26137	6.12979	10.6249	11.5306	8.93965	9.86038
Q14126	14.5391	17.6965	9.16324	8.74805	8.93262	25.5021	7.06824	6.68577	10.8005	11.1304	6.20055	8.00457	9.35752	13.87	9.86959	9.37424	11.3535	8.94868	4.83641	6.99434	8.26347	9.11451	10.6892	8.30284	5.04835	21.3325	6.23681	3.48836	8.65762	9.28426	10.0905	8.27873	9.85017	3.4911	7.72411	8.50741	18.0561	10.1617	9.701
Q14204	198.035	1219.92	986.688	360.3	125.51	507.685	158.375	986.587	1169.37	1691.52	1177.86	521.256	140.262	752.894	1094.46	1069.63	1019.88	868.448	852.701	816.967	79.4586	161.268	346.547	199.509	72.0404	2284.1	113.671	127.297	42.3619	155.542	244.625	268.247	108.817	52.6493	112.37	96.7305	111.666	259.94	101.465
Q14247	234.223	397.658	287.739	308.039	265.897	267.822	340.077	269.13	244.566	296.438	270.788	279.127	261.678	258.465	256.104	158.621	270.687	268.161	274.329	257.993	297.512	287.282	233.015	273.355	251.124	274.321	283.886	266.237	290.335	233.593	281.78	225.325	267.824	388.082	215.849	277.859	296.966	240.905	327.937
Q14376	4992.44	2969.77	3956.41	3785.93	3992.74	4085.72	8836.96	2075.29	6100.08	3434.21	2286.56	4717	6761.97	3110.23	3024.58	6115.45	4407.14	2877.3	4002.5	2556.87	5308.45	6188.88	5867.46	3533.81	4164.84	4733.26	5870.95	5233.39	4449.35	5016.2	8102.35	7759.38	6389.83	6895.72	4515.96	7440.2	6202.13	5189.19	5159.45
Q14515	17.097	29.2716	16.6812	11.3032	24.1487	11.0148	12.6846	33.4723	18.5697	23.9163	17.6532	18.1554	8.69858	24.6443	13.8605	31.0312	15.7055	14.5024	32.732	18.3023	15.0694	17.0799	18.8481	15.2695	16.5574	41.1807	27.3567	17.3343	19.2884	25.1066	18.7262	15.7867	18.3562	16.1036	17.7928	18.8454	21.1181	20.5635	11.2722
Q14520	464.477	629.689	600.513	765.287	546.069	545.779	404.199	388.815	610.922	462.277	586.879	478.187	440.072	519.549	612.375	483.129	521.158	561.464	486.853	491.593	424.25	431.402	494.828	468.661	496.118	479.844	414.031	499.784	192.973	375.464	361.21	427.778	436.822	429.587	434.378	369.31	436.038	319.831	534.618
Q14624	5378.85	5745.49	6484.46	5660.58	7129.15	7892.02	5178.72	6832.85	8899.46	5852.89	6377.74	7232.63	7299.21	6967.74	6949.87	6531.85	7643.97	7557.84	8410.59	5406.3	6556.04	6314.67	6102.84	6318.43	4776.93	5342.64	5764.89	6081.14	4900.88	6845.51	6265.86	5702.63	6500.12	7637.26	6591.02	6212.58	5181.16	4033.59	7037.51
Q14766	4.21379	10.2188	7.85423	11.0993	6.63112	6.84203	8.71701	3.61529	6.71554	11.6427	7.35715	8.34585	4.95662	3.76548	6.08718	10.7972	8.79454	8.88707	6.9004	6.36822	10.8853	5.57283	7.5362	8.97091	13.3578	9.94514	9.65575	10.318	8.43793	6.12935	7.8875	6.91311	6.04122	21.5565	5.92285	6.14236	5.21969	12.3131	8.85322
Q15063	8.61957	6.37418	5.84943	12.5528	4.18477	6.86429	1.60665	7.31263	5.58237	6.9221	11.9119	4.18181	4.0323	10.5548	7.69053	8.96695	3.45038	7.1065	7.13618	7.79408	7.13419	36.3678	3.24762	7.60098	2.90333	6.82815	1.22603	5.28358	5.66541	9.3138	6.61136	12.1972	4.42442	9.20062	4.55652	8.9942	13.4659	6.05365	1.66267
Q15113	22.9025	29.5224	33.1449	24.582	14.4334	11.9761	39.1874	24.3081	55.0108	21.0571	44.2455	27.5646	28.3492	27.7088	19.4938	30.4393	18.1091	18.5009	28.67	29.8308	16.9825	27.0181	29.8093	14.5884	21.0342	36.4447	24.9386	22.3906	22.798	33.8795	33.3781	15.2774	20.8244	17.7155	25.0965	32.0729	33.7964	21.5418	32.6373
Q15166	39.7424	22.1869	25.5105	45.9537	14.2789	21.4206	15.778	28.4176	20.3255	21.1629	31.5008	27.7064	32.1458	49.0907	25.2735	23.7455	27.8299	32.8828	30.7275	19.6515	41.4254	30.8491	41.5524	22.4095	14.5507	40.6986	15.7488	12.8026	23.4414	31.6556	40.8703	27.1594	23.8069	28.2347	26.2459	49.9195	15.8681	32.125	26.1618
Q15485	78.9316	37.8078	89.2866	38.4006	32.6682	22.7026	43.1634	54.3204	10.3941	39.3759	30.3	45.4563	46.042	46.0338	39.7992	31.7532	30.9108	47.7995	43.748	55.671	58.6833	19.44	41.7351	24.1759	53.2578	32.4367	29.7681	55.0722	38.229	26.9711	36.7608	23.1084	27.2491	9.27623	17.0979	7.53769	25.9468	38.4885	32.1532
Q15582	167.5	153.314	127.731	161.251	276.088	211.65	140.733	109.279	120.985	126.443	105.198	106.626	107.345	112.219	124.807	125.418	95.5551	101.316	121.78	121.066	115.595	155.255	151.32	149.619	150.938	99.3834	144.291	157.479	64.3499	125.194	146.667	145.673	130.259	172.208	138.762	220.138	129.134	125.802	161.775
Q15828	8.6589	18.7956	12.8421	14.9236	9.11695	8.02318	11.6895	17.8829	16.5786	16.8767	12.8741	12.6052	9.55148	16.7852	12.47	18.4732	14.3623	16.1263	16.1263	18.8461	11.1379	10.8287	14.9236	10.4864	12.5523	16.5786	10.8287	8.96709	13.119	9.06982	2.10488	8.0012	9.08946	11.552	13.415	8.0012	6.89721	6.89721	7.48444
Q15848	106.745	105.211	44.4188	105.559	90.5282	48.3927	33.5794	121.137	115.478	65.9282	98.6998	117.819	113.894	344.296	102.18	105.32	113.335	89.6624	114.299	93.4183	62.737	222.357	50.5264	74.3354	93.9489	233.695	97.9288	70.5251	81.3176	224.505	383.193	42.5719	102.69	100.765	118.829	195.335	99.3563	297.111	128.208
Q16610	109.347	217.294	101.936	133.084	84.7425	287.503	125.061	170.352	289.962	177.579	157.163	100.072	126.179	138.738	143.294	229.681	126.733	119.312	126.292	140.874	145.193	84.8535	190.611	120.257	155.956	218.166	85.0658	67.4899	62.9426	170.86	146.774	76.7496	69.2921	111.399	94.1868	135.749	129.487	141.768	87.1259
Q16706	15.4921	12.6898	9.26462	18.8431	11.1312	9.85947	8.90698	6.73005	7.03123	4.46461	4.89433	6.94992	16.7954	7.49173	9.13712	15.2364	8.68982	13.3372	12.9022	10.279	10.9922	6.66695	8.334	14.8977	13.4485	9.62399	6.87303	6.83186	9.70332	11.3679	17.5963	6.13151	8.08515	5.29408	6.87857	13.2948	5.50488	41.5966	8.55848
Q16853	38.4187	33.9279	33.1127	28.6052	34.0064	44.9261	15.3008	10.737	25.4232	37.7695	31.2533	23.7079	20.5411	33.9606	19.49	23.1189	22.4787	22.4227	27.4384	32.0116	20.4705	15.8868	19.0734	11.3252	32.5963	52.991	18.8608	8.21887	21.3879	29.3529	25.4321	28.8912	41.1019	21.3448	17.3273	50.7082	19.3679	38.0002	15.984
Q4G0P3	5699.17	4485.47	5270.43	4293.53	7079.36	6962.46	5619.29	5910.33	6842.88	7918.15	4749.24	6478.17	6083.95	5368.41	5627.23	4212.56	4795.85	6287.85	7100.79	4507.66	6334.56	5881.05	4895.88	7657.89	5211.36	5644.85	5472.27	7212.09	1784.73	6677.31	6403.95	8104.34	6403.27	6770.21	5205.95	5840.2	8009.7	5584.73	8462.93
Q562R1	83.8135	251.716	118.775	75.8397	140.425	94.8231	118.842	79.8186	97.6335	119.466	161.474	31.7374	73.2157	281.57	92.1911	168.991	41.3574	85.8666	102.342	585.89	82.0359	98.2179	67.9189	89.0498	93.7026	275.289	115.881	122.911	124.628	80.3252	40.824	50.5572	66.6435	71.3806	49.646	80.9446	78.107	232.28	84.9216
Q6EMK4	52.9074	50.6591	36.1292	49.8216	65.3975	60.0707	46.3814	50.1239	53.0148	34.5794	56.1962	31.6409	28.517	48.1479	51.2222	48.7775	34.6766	42.3397	54.2961	51.7712	24.9936	44.7154	41.7547	23.823	46.1079	72.9063	41.6466	45.7882	46.5209	48.5217	58.9129	33.1995	33.6905	36.0376	26.0693	52.5047	48.7059	31.1359	30.6668
Q6Q788	7.15753	7.82453	3.92496	9.21702	9.47678	3.25619	19.7106	9.01973	9.13364	10.0605	6.3264	9.86169	10.8914	6.78695	19.5519	6.28075	10.6527	10.9171	8.44663	3.35443	11.2785	2.29491	8.41398	15.3824	3.36302	10.8373	4.68978	6.92844	9.38419	11.8049	10.4783	10.7484	8.79941	4.6841	7.80652	10.5047	15.7673	5.04036	11.1142
Q6UWP8	1.53536	1.77699	1.49245	0.916562	1.53536	3.08042	1.42029	2.11212	1.65375	2.00268	4.51023	1.30997	1.50667	1.92062	1.47798	0.840604	2.26955	1.26279	1.87962	38.1137	3.41069	1.43952	1.77699	1.53536	0.671706	2.00388	1.53536	3.94234	2.417	0.750247	6.34932	3.94234	3.94234	1.3916	1.53536	3.94234	1.30522	2.26912	3.0633
Q6UX71	14.8023	39.459	23.3949	26.8805	20.0803	24.1613	26.6733	29.3316	22.2693	25.7566	57.3282	14.2038	21.4617	27.6052	18.6417	21.4575	23.5064	19.8171	19.8855	33.9499	22.0538	39.1007	23.0393	10.8819	20.1479	65.6776	25.4225	12.9436	25.4287	26.3059	28.242	26.1362	14.2777	8.90406	22.3633	25.6343	26.4726	26.9928	13.3487
Q6UXB8	18.4666	17.7545	16.345	17.1093	6.44611	4.8918	23.1002	12.5412	13.8285	25.8569	56.4482	14.5864	16.6713	44.7006	16.0727	34.7532	10.6705	9.49416	33.0896	23.0634	19.8334	32.5488	27.4451	14.4178	30.8315	49.0348	27.3387	12.5682	21.1086	32.7594	54.5975	22.2086	22.5631	24.8126	23.346	53.1346	42.0123	11.5377	7.1621
Q6UY14	1.90176	4.48198	5.4479	3.47844	5.78544	19.5335	2.31443	7.25896	3.22654	3.83817	5.64281	7.92721	6.75196	5.36537	6.05396	3.41624	11.0054	8.04545	2.20098	3.7175	6.25119	4.56787	2.63177	10.5431	1.9972	5.4482	9.03448	5.20551	5.9739	5.98809	4.73515	5.45953	3.93149	6.42335	8.16811	5.16957	5.06723	2.57727	1.6738
Q6YHK3	13.7874	6.57414	3.99566	7.26447	10.7921	9.60842	7.24591	3.35863	8.52655	5.09686	11.3154	8.14524	9.45176	22.8664	7.70092	2.07799	8.20341	8.79502	7.12576	8.72561	6.70493	9.8985	7.32412	12.3703	22.5148	6.65477	12.0965	27.2502	10.8865	14.3485	13.7406	13.2473	5.66847	6.2288	11.1111	13.0745	19.923	13.3751	15.0432
Q76LX8	11.5103	15.5902	7.72598	14.1145	7.19793	9.02452	11.0768	10.2826	11.8443	5.74755	13.2242	13.6847	14.2698	10.3729	9.80832	21.7955	12.9908	10.4376	15.2134	13.8114	12.9638	14.456	11.2564	11.4064	17.442	11.0365	13.2235	8.2735	11.1575	9.70392	6.82223	8.83189	7.67533	13.1074	18.8672	10.2606	10.7883	42.17	10.3328
Q7Z7G0	10.4316	14.9023	9.60688	15.3969	7.68849	12.0777	8.46893	6.42084	4.94562	12.6038	10.2679	12.0191	4.08807	1.67778	11.9962	3.87868	4.04732	2.22718	8.83496	5.3418	7.25151	8.91532	14.1511	7.90993	8.05295	13.6236	9.0873	9.41244	9.61117	8.98422	5.34091	8.60931	4.10727	6.34644	6.17906	9.06741	12.0712	5.1188	1.97123
Q86U17	9.84373	11.3903	15.5294	11.4805	20.7726	13.888	23.6016	7.50218	19.8995	15.9547	19.2061	18.334	19.0607	24.9297	16.0732	13.8367	19.446	15.4339	19.7235	40.3227	14.1447	36.2186	19.5689	22.5403	10.009	18.4254	26.1295	18.7818	19.4129	15.2229	16.0176	18.2599	28.8149	24.0317	9.0874	12.9209	20.5726	18.2222	20.08
Q86UX7	1.216	1.723	3.58745	5.37711	1.45298	2.18371	3.18756	3.77859	9.67724	4.00305	3.18517	2.48814	1.18591	2.52436	2.47769	3.48272	3.72237	1.70749	3.02028	7.59118	3.44059	3.67138	1.83939	2.1983	3.56831	3.75661	3.94906	2.78421	2.43495	3.56831	3.56831	2.38463	2.1983	2.99848	2.64198	2.38463	3.60267	3.56831	2.78421
Q86VB7	16.3342	14.5356	8.28487	9.6771	19.2144	14.4739	13.7568	6.45478	9.15781	12.1697	16.6723	15.8815	14.1479	10.8459	7.82913	23.2787	11.8275	13.8571	14.2711	22.9057	7.99014	26.1512	13.1241	15.125	17.7409	11.4766	9.6399	20.4541	10.8252	11.4797	6.33727	10.0054	10.1477	11.1463	19.2133	13.7025	11.8862	37.391	5.66227
Q86XI8	428.98	412.231	175.817	136.22	354.156	403.305	514.48	540.942	315.562	527.706	160.071	678.914	168.273	582.438	138.86	225.397	653.607	449.37	57.1763	93.9724	576.802	1201.64	158.254	581.847	376.089	156.17	356.295	592.211	2404.68	323.616	570.813	563.89	388.349	208.688	600.26	458.83	516.224	1000.67	642.362
Q86YA3	34361.6	68414.3	59560.9	56706.3	23515.7	59639.7	6528.85	72575.7	87245.9	100324	64701.3	54799.8	24930.9	71142.4	55114.9	80072.8	77528	71054.5	74293.4	65056.1	43339.8	8277.66	54502.8	17025.5	2506.01	120235	3472.04	16195.1	31929.5	10686.4	24511.9	35461.8	887.366	1694.6	927.59	11907.7	4592.11	30627.2	16315.7
Q86YW5	9.12768	40.6627	63.2773	72.4781	65.6935	39.4176	73.2327	37.2918	47.0993	58.8999	58.2792	39.7035	43.8186	26.0496	39.6799	101.676	44.3719	94.0331	61.0928	38.3215	9.16297	13.7577	48.5931	30.5049	64.0983	52.3016	97.8761	72.9026	62.1458	44.4564	47.8879	41.2467	37.7791	42.7951	9.67915	55.596	15.2836	55.0162	34.117
Q86YZ3	2.27517	2.85033	4.53826	5.89976	3.28265	8.58063	2.30489	7.51502	9.23328	3.53222	6.72934	3.48032	3.04549	2.46482	3.23563	2.18553	5.35119	4.41896	1.35029	191.36	7.61632	4.31178	2.8505	5.12555	4.52597	4.5631	8.06338	2.29527	41.2493	2.76039	4.51211	9.50318	1.37762	3.26094	3.6322	3.89109	4.76811	5.69185	2.79684
Q8IW75	252.8	91.6802	176.431	104.042	187.794	155.946	469.278	95.6028	191.305	100.511	151.304	310.672	272.494	150.819	105.99	169.893	225.849	186.388	247.358	122.478	206.769	450.952	229.139	271.883	147.987	232.093	189.319	295.85	425.285	279.82	339.75	303.13	288.872	160.413	300.847	292.513	229.674	263.341	220.822
Q8N1N4	10.817	490.3	424.41	369.101	134.955	426.022	372.898	778.336	432.094	507.917	159.839	186.412	193.507	19.8625	179.89	1519.35	409.522	17.2336	431.312	502.652	181.477	747.594	97.9401	77.0642	49.4653	64.8279	64.0713	69.8105	81.779	324.087	332.091	1134.27	210.831	202.936	29.791	297.959	400.026	34.1885	278.545
Q8NBP7	19.7118	18.6188	18.7324	14.9117	12.1635	14.296	12.3515	15.9033	11.5666	22.0311	21.2571	9.54414	13.5577	22.8727	13.1108	32.8536	10.702	20.2251	9.03546	28.1461	13.7605	14.2511	18.1123	10.3185	11.3227	12.156	20.6291	12.1271	15.7202	14.7576	16.6928	14.7732	19.7189	8.2079	3.24545	15.0502	15.8045	21.062	30.4944
Q8TCY9	97.5688	153.653	122.489	79.8168	92.1897	55.0186	110.827	143.352	109.23	114.73	94.501	43.2536	110.827	75.7491	113.706	208.598	214.134	151.898	81.4992	155.864	117.186	89.2621	211.752	77.0402	123.554	107.463	110.827	123.554	145.102	123.554	123.554	110.827	77.0402	112.266	77.0402	110.827	123.554	123.554	123.554
Q8TER0	4.29173	15.2861	5.82133	6.18836	5.24426	15.2295	5.03569	6.69083	8.20798	6.59703	2.81145	6.72339	2.07355	6.9879	4.64267	6.59703	2.50594	6.12798	6.27483	1.89653	4.11401	4.6733	6.52496	4.79362	4.4588	6.9879	4.68096	5.15413	6.5247	5.44159	3.96624	3.8418	4.65572	4.76869	7.32286	3.8418	4.50096	4.48691	4.43122
Q8WWA0	10.3003	8.4671	6.40838	5.29951	10.3567	8.73431	13.2903	15.9251	18.9743	29.7564	12.4259	3.69284	4.90166	10.2712	9.71507	26.521	11.108	6.37413	10.3565	13.2498	11.2697	11.3634	10.7079	8.86389	11.6357	16.1129	20.2512	12.0859	11.3411	11.7311	12.5631	11.325	9.95097	14.2904	11.5464	10.7256	13.3135	13.0663	9.97273
Q8WZ42	2264.08	2316.01	1363.74	951.211	918.308	2221.91	2196.02	881.176	1193.76	1333.71	997.372	1227	608.651	3629.55	748.654	2110.97	742.035	528.452	1202.34	2897.4	1776.36	225.587	1402.83	602.423	3316.56	2555.49	2505.43	2319.44	1310.08	1393.32	1353.25	2399.36	635.533	730.885	770.048	1089.74	1545.77	2303.82	1924.38
Q92820	58.7826	38.4647	48.9904	38.0366	57.5245	31.2388	33.0495	26.7314	28.2339	44.1929	68.9929	30.5507	31.5161	30.3322	40.495	67.7973	39.5544	41.4465	35.7824	52.6998	31.1523	34.9087	31.1619	37.4463	63.9621	35.2174	35.6812	49.4147	44.5424	34.8118	45.6534	40.5738	31.3684	62.9988	37.7109	40.445	41.6126	53.4482	35.2735
Q92835	961.908	56.3348	192.493	70.0551	25.2278	109.254	162.544	125.554	161.79	42.3819	232.123	70.0793	59.9844	38.0907	55.9207	17.507	117.174	66.1782	118.627	81.6981	152.821	261.188	348.668	260.7	51.7104	341.073	432.137	308.306	301.513	684.919	901.153	1313.39	432.35	369.203	86.0956	394.821	556.218	1020.79	681.485
Q92945	11.268	18.9279	32.1315	15.2465	36.7017	36.8866	22.0737	30.6855	21.4028	35.2308	28.1428	57.2181	8.98626	61.2784	61.5312	20.0725	46.4017	43.5021	33.6971	30.9608	5.68072	2.1504	5.64328	29.4222	25.5859	56.3422	29.2064	18.8869	29.5439	36.5696	44.2406	8.27431	39.1276	14.502	42.0712	54.1352	26.37	10.3332	19.8039
Q92954	166.267	154.174	195.205	156.191	91.9541	80.0256	130.027	90.5358	51.6208	175.968	153.713	98.6089	94.817	116.455	150.909	160.661	98.0787	150.335	138.555	127.627	82.7928	56.788	176.5	111.565	180.288	108.247	123.624	211.614	100.324	81.2454	61.6547	99.6185	100.696	71.8943	74.5813	65.7789	76.1751	91.6115	200.517
Q96IY4	329.059	265.488	304.381	227.751	339.613	446.041	275.469	250.143	228.133	313.56	218.016	290.347	317.274	262.075	279.371	247.314	224.786	277.074	253.839	203.778	275.996	308.977	232.385	288.659	121.093	228.882	262.631	326.265	196.092	273.442	314.508	307.484	301.315	412.872	319.679	316.095	258.197	313.751	459.103
Q96KN2	193.417	269.086	233.456	284.751	119.398	109.808	145.983	257.615	150.602	216.777	263.193	150.851	150.171	258.536	222.329	182.716	176.89	241.18	84.6435	231.084	200.263	177.085	250.688	157.299	217.058	201.405	243.59	292.501	957.821	135.843	186.379	173.898	237.093	108.149	140.131	101.908	190.341	142.545	240.567
Q96PD5	1365.29	1708.64	2106.36	1801.59	728.969	1336.43	1262.18	1736.23	1765.29	1574.95	1976.63	1809.24	1797.76	2019.97	1921.69	1873.08	2089.1	1771.41	2036.07	1578.2	1381.77	1508.22	1874.33	1344.03	1169.41	2351.92	1901.49	1622.12	3112.23	1973.54	1325.88	1624.83	1679.28	1523.64	1771.01	1506.5	1590.97	1614.75	1531.62
Q96QR1	4.68832	9.83757	8.68809	9.37855	8.50892	8.46866	6.27479	7.44106	11.2654	8.99092	8.31071	3.77548	6.09662	10.232	8.89799	10.3975	6.84142	8.77564	23.5829	2.10753	4.22252	3.6382	3.77436	5.38271	3.55543	14.9769	6.15044	4.0245	6.43595	13.5372	8.34974	4.91232	10.231	6.09611	11.0081	5.77067	9.98941	6.42465	1.44365
Q96RR4	77.4254	124.06	93.9202	106.812	70.8256	81.8336	70.6946	100.736	77.9965	97.6082	140.98	89.0224	46.0974	74.1884	83.7276	85.0086	118.583	111.831	107.334	154.043	93.216	77.6478	74.3092	81.6077	94.6062	103.833	72.0922	71.9574	98.1915	69.5034	57.3991	66.7854	70.3963	83.2382	75.8398	71.3974	72.7617	76.0027	72.1441
Q99784	11.4453	24.3979	13.4531	16.561	9.09671	29.1307	12.8282	26.628	30.3237	30.4103	31.7422	35.4259	17.0582	30.592	21.2657	22.0252	33.0755	37.9016	26.2053	38.3245	19.6482	17.8282	27.4554	14.7447	16.9074	41.317	11.7104	21.6284	22.5347	8.99111	20.3947	14.2654	13.2083	12.1046	9.29396	14.0892	13.7746	14.2967	6.14839
Q99969	12.3699	19.2122	26.2693	20.8705	17.7073	11.2969	21.7535	9.41273	17.8233	17.4808	17.7872	9.53937	20.4904	24.1635	12.1524	28.8851	19.2151	14.0418	20.3777	27.9675	18.4186	8.28328	16.5423	18.4577	31.5508	20.7237	16.5348	19.5125	43.8129	13.5141	13.1101	13.688	19.7385	14.7153	16.7667	22.5802	20.4534	13.4185	22.3208
Q9BUN1	78.2699	74.4767	59.9394	106.118	32.7715	35.5723	47.6057	97.203	79.3849	76.2746	90.3893	39.7629	61.7169	100.195	60.7184	83.1488	96.6833	53.1238	62.3947	39.2836	69.4315	37.7956	72.5235	64.1039	36.6483	131.821	25.9076	40.7073	54.2057	73.4332	131.319	42.7869	56.027	109.02	2.96413	97.4056	53.734	67.9395	62.5978
Q9BWP8	37.8812	52.2145	26.7958	33.6718	19.2	40.7716	46.1963	39.8358	75.4788	31.8789	18.3541	27.286	33.0821	43.5255	35.314	38.0845	38.2988	27.4646	35.0937	32.9432	19.793	28.0255	36.7575	13.7731	27.7064	33.8896	32.6891	33.7871	31.575	35.2065	20.6833	20.799	25.0758	18.139	32.6306	35.1319	28.5932	46.4815	34.3639
Q9BXJ4	4.95426	1.64421	5.51055	5.54608	4.64601	2.4035	2.54979	5.11898	5.22894	8.01651	8.20967	4.06021	6.97287	8.01651	5.58433	5.39309	8.88132	5.11898	5.18938	12.2139	5.11113	4.49216	5.48976	4.42987	12.7329	19.6067	4.69184	4.21007	4.13456	9.47742	5.42792	3.65448	6.0836	6.7771	2.11321	5.43141	4.0478	5.87263	4.35272
Q9BXR6	57.0532	69.7708	75.142	52.9402	55.8047	36.0522	48.2235	56.7354	54.6896	40.8065	96.0596	69.3138	52.4671	65.8638	53.5294	44.1069	58.035	86.9201	37.2594	38.7561	52.0776	24.875	36.3996	52.9915	51.5142	66.4499	48.4857	37.9833	58.6168	30.156	45.2716	44.8976	40.6147	25.3647	40.1132	40.056	25.1753	24.9916	46.4184
Q9C0B1	2441.1	3320.18	3218.39	3186.22	1761.69	1964.43	3339.45	2830.45	3070.48	2819.51	2767.57	3013.05	3952.66	2857.52	2571.59	3597.55	3087.08	2358.52	2753.56	2517.42	2772.54	2337.64	4135.94	1487.74	2674.4	3358.44	2724.93	2322.09	2673.86	2707.6	3303.22	2289.05	2943.29	3171.85	3236.28	2615.25	3375.72	2613.25	2065.79
Q9C0I3	10783.9	9564.72	10069.7	11757	5199.01	15938.1	14456.7	8454.48	15144.4	11111.6	8970.85	13054	12475.3	10778.6	9939.22	15846.8	16484.2	11420.7	11259	7072.83	14300.1	13225.6	13703.4	13054.1	8264.19	19999.8	12551.5	12155.6	13953.8	14399.5	20615.9	16241.9	13582.8	12852.3	8365.88	11951.6	14440.1	16000.1	12804.1
Q9H4G4	21.0258	12.5659	6.71951	8.6228	7.31624	4.6033	13.6768	9.80974	9.70711	7.99539	16.5007	10.3234	14.1768	30.4769	14.1467	11.8098	22.5796	8.02445	15.81	12.606	7.41579	11.6221	11.569	14.7223	11.9164	20.1226	10.806	18.506	12.7834	20.2237	6.54434	4.86804	9.37973	10.9548	18.3041	15.7317	10.7449	9.69964	9.38701
Q9H8L6	11.4163	9.86939	9.8092	8.4928	9.73445	8.29399	9.43215	7.28286	16.6676	10.9878	8.99595	11.737	7.00328	6.26311	7.69285	3.28959	9.26443	15.6722	4.98718	14.6924	10.0411	9.59007	11.4117	7.52481	10.5628	17.6826	8.85687	6.16551	9.59558	9.08037	8.99716	8.24017	15.7515	8.07156	8.84503	9.62188	7.25164	8.02826	4.71631
Q9HDC9	33.7764	94.9626	73.1319	64.3066	36.723	138.786	55.9885	97.8754	48.4087	57.0385	59.4846	56.1937	74.6453	112.01	67.7404	49.4764	55.8107	83.8928	67.4077	63.0143	56.6025	65.0903	54.4955	72.1346	65.9254	69.5842	75.8516	47.9501	64.9224	63.7828	88.8269	44.066	58.1191	51.1293	73.1037	60.8512	96.2281	68.1019	84.0842
Q9NP80	119.436	256.177	71.0311	239.98	292.391	112.15	37.8764	279.63	216.274	151.66	222.687	297.63	117.561	446.35	129.387	104.012	88.6968	64.6554	86.4898	58.61	281.905	209.104	57.3459	294.315	264.151	132.653	452.747	293.708	179.327	227.483	351.394	187.199	62.0547	398.446	311.081	63.3574	182.042	419.725	88.3017
Q9NPH3	33.6968	18.5432	8.88876	17.723	8.06117	10.5829	5.8419	20.0558	23.7965	12.4485	10.5527	22.4985	15.2982	18.9871	26.9664	19.6143	13.52	33.7901	18.5295	20.4105	10.1288	23.2776	19.0092	28.2482	5.5568	4.9221	22.2731	8.13575	18.1422	9.85264	16.4726	11.5144	12.0997	29.9203	10.9899	4.60413	15.6333	40.6605	18.9162
Q9NQ79	31.8274	29.1959	27.2157	44.4308	30.2368	34.5786	35.1805	45.3551	56.5729	31.3517	56.2495	60.5201	58.2201	52.1184	42.9654	34.5753	43.1599	27.1325	40.5361	62.3267	73.6717	21.4495	29.1705	41.3962	50.8814	58.7017	68.0011	47.6779	138.122	62.7447	49.8835	44.3849	38.2237	43.4211	39.7067	55.9905	60.4571	66.0731	46.8336
Q9NQZ6	107.001	44.5602	76.2903	70.5974	52.3162	128.74	114.335	39.5693	124.684	49.5266	71.9489	107.843	121.166	103.267	76.0872	116.78	120.392	75.7034	80.2571	45.5529	79.711	69.3276	110.43	96.3681	79.5395	105.977	97.694	105.488	139.95	123.963	186.842	116.54	116.292	90.4723	88.1787	114.39	144.716	110.084	97.7106
Q9NZP8	489.675	560.08	658.631	732.21	829.477	710.503	623.375	537.562	517.12	528.206	648.789	483.814	475.18	449.798	562.755	614.223	677.757	871.053	735.85	449.75	519.585	776.836	577.548	570.924	499.649	510.553	550.558	615.417	368.846	596.919	650.454	383.079	546.161	616.781	602.169	602.796	558.832	671.363	446.088
Q9UBF2	158.846	39.9632	26.9591	69.3696	273.275	145.277	135.979	130.465	44.3168	47.1033	108.671	125.667	126.425	56.9621	110.57	109.623	24.7029	58.4637	110.098	41.2208	211.62	187.58	53.8334	476.454	339.404	21.3422	218.055	521.84	199.71	405.488	602.486	333.484	336.229	340.244	215.646	843.908	298.734	363.648	569.386
Q9UGM5	256.061	446.719	412.793	325.502	416.464	361.234	350.657	221.072	373.6	337.859	539.653	314.237	358.234	325.153	417.305	309.758	284.472	426.312	331.474	297.674	508.246	526.291	295.206	302.255	385.445	414.099	338.705	440.675	484.28	336.325	318.983	331.341	303.989	307.926	343.007	220.992	273.706	361.102	368.604
Q9UHG3	126.081	138.753	114.339	142.326	67.9987	89.2073	84.0958	87.7243	72.4251	105.015	113.442	64.2936	96.7613	135.366	110.683	94.7429	109.571	99.7864	92.3249	63.2047	90.074	60.7293	147.187	107.554	72.7824	163.481	87.2407	87.3503	104.409	94.4568	101.611	88.7133	108.564	56.9978	80.1476	124.146	86.1133	66.2901	136.531
Q9UK55	163.861	165.594	266.619	252.508	149.448	207.711	136.748	164.329	158.029	180.774	177.005	119.141	130.158	155.224	170.854	181.851	200.505	215.824	197.003	152.998	87.9185	95.1722	180.215	171.366	112.258	190.488	128.71	156.239	182.391	150.349	116.85	107.625	139.396	232.66	172.748	67.0365	135.526	118.201	249.559
Q9UM73	135.337	26.2144	49.3806	33.8309	102.238	54.0139	378.096	71.6169	110.669	44.9022	27.4339	82.9907	116.247	26.5348	31.0687	199.133	67.5401	42.7524	74.7637	35.5995	90.5787	213.312	92.0935	176.295	47.0984	156.029	150.447	165.604	119.224	89.1505	330.732	281.978	157.737	129.823	36.2153	293.547	99.9021	80.2842	147.887
Q9UNN8	70.8144	35.1499	27.5573	34.5781	32.4336	52.2836	40.4411	73.9857	28.5719	63.4942	48.0537	25.5437	31.3394	45.0082	42.9845	50.9336	34.6747	19.211	30.6223	27.8943	19.6438	56.6747	39.9103	20.284	111.145	63.661	30.2528	40.2573	34.8978	41.141	45.7401	73.8561	33.6445	29.0422	29.0764	40.7786	42.769	59.7796	23.6421
Q9UNW1	34.4767	10.1121	18.6007	23.5151	18.7854	58.985	20.4952	22.3708	17.1612	31.5091	10.055	6.38747	13.4937	47.5121	14.2748	31.0907	20.7662	5.59297	15.5053	18.2503	9.64085	46.9773	14.6581	10.7212	19.5431	9.98062	29.9427	15.8154	15.0453	27.6565	40.2477	50.9615	20.9859	41.3115	5.99268	36.5686	43.9369	84.2798	32.409
Q9UPP5	35.3692	261.442	375.496	305.083	101.602	393.061	71.2613	189.805	608.404	303.209	342.883	269.914	237.031	160.13	234.91	593.575	466.604	531.084	548.361	344.805	132.156	54.967	462.175	41.0596	32.917	486.003	8.6675	29.5853	208.467	134.826	139.052	104.417	29.9771	37.1693	23.8694	52.9752	42.7688	36.4309	41.2909
Q9Y490	4.41052	5.22401	4.6591	5.44442	4.04107	1.7283	6.78497	5.79564	5.63854	9.24257	4.66612	4.47111	4.68266	4.73823	4.75297	6.1364	5.98357	4.20735	2.27502	7.11131	5.74178	4.25283	4.67233	4.24996	4.98224	5.36321	5.36056	2.80121	3.28026	4.8025	4.30218	4.98224	2.26199	7.09041	4.75866	4.30218	5.25799	4.98224	4.30218
Q9Y5J7	143.908	17.0493	57.0177	40.0899	105.172	48.264	224.635	46.9185	115.6	48.8745	21.3665	125.609	125.107	39.4774	16.529	34.4088	32.5502	45.857	25.3699	22.9161	105.891	152.86	29.9971	154.398	77.5084	42.1742	204.581	117.455	99.0204	112.109	205.677	284.135	139.205	166.814	59.352	211.488	145.967	185.207	144.455
Q9Y5Y7	32.9347	85.657	40.9979	54.0216	34.9751	62.8999	46.7363	61.5984	41.407	44.7328	130.888	60.2407	57.9455	104.961	41.0832	61.6233	44.6627	54.2742	75.7146	105.816	40.9438	34.0897	72.5569	36.1649	56.0162	96.7744	57.4921	63.4281	62.3256	120.06	101.072	69.712	85.814	46.0068	84.3944	62.0066	61.2392	178.587	29.4498
Q9Y646	11.5263	14.4435	4.50782	6.67915	12.3212	12.8533	6.71136	17.7292	9.56467	11.6116	12.783	9.83126	11.5133	18.0525	7.77194	41.4548	16.0783	8.40735	13.6007	15.9964	23.1895	8.88058	14.0249	9.00886	8.54736	16.7643	9.58209	14.7279	10.1642	13.634	25.8278	13.8891	11.9209	11.191	17.8115	21.7841	13.1413	5.76869	5.01984
Q9Y6R7	87.3905	77.1115	33.3947	51.181	132.755	116.757	58.9338	69.9674	187.377	140.064	70.6322	101.031	105.846	141.873	86.7472	96.2302	91.3968	64.8782	50.6837	81.1386	69.2476	128.65	101.668	77.0627	133.929	77.6968	106.748	92.9794	104.352	132.118	74.7953	155.648	110.072	83.9609	88.2528	157.817	144.765	120.421	94.4771
Q9Y6Z7	24.979	24.4587	18.6092	29.4948	11.7815	29.2652	31.5059	26.7778	54.7023	12.5364	23.8659	29.3243	18.5797	29.8227	27.0936	49.9826	20.7682	19.0969	19.0916	20.7373	21.8539	22.0475	28.4949	8.94312	37.8759	32.7081	22.5453	33.1461	23.0932	17.5067	28.6219	24.7296	21.91	13.5287	8.61941	25.2043	24.7415	28.1216	31.9172
