# Supplementary material for: A comprehensive view of the molecular features within the serum and serum EV of Alzheimer's disease
Source: Royal Society of Chemistry journal article supplement (doi:10.1039/d4an01018c), 2025-01-01
Supplement: d4an01018c6.xlsx [file d4an01018c6.xlsx]

## Sheet: Spectronaut-serum
Protein.Group	AC1	AC2	AC3	AC4	AC5	AC6	AC7	AC8	AC9	AC10	AC11	AC12	AC13	AC14	AC15	AC16	AC17	AC18	AC19	AC20	AD1	AD2	AD3	AD4	AD5	AD6	AD7	AD8	AD9	AD10	AD11	AD12	AD13	AD14	AD15	AD16	AD17	AD18	AD19
A0A075B6H9	2256.34	1176.33	1103.59	597.372	1124.42	744.286	1019.61	883.701	1363.03	1167.76	1958.28	1128.17	1071.93	527.114	726.699	2811.34	1021.22	559.147	530.516	891.68	1160.8	2426.3	814.748	1463.41	2616.23	519.033	1491.98	1291.5	2227.62	2077.13	2689.91	1919.16	859.367	1762.67	3263.58	1425.45	2082.59	2760.89	2072.44
A0A075B6I0	1822.72	1834.22	2686.45	404.895	1493.32	2193.42	173.899	2261.24		2022.8	4191.62	1218.37	853.088	3042.93	1462.52	2260	341.067	328.183	1123.7	1094.28	1665.88	3339.27	1512.95	383.202	605.133	1087.48	514.232	1222.96	197.272	1905.15	2100.23	1553.81	1259.54	981.768	450.025		1437.49	5363.28
A0A075B6I1	208.774	179.178	78.7178	88.091	193.332	115.654	137.338	129.433	238.958	165.845	417.478	46.0327	155.239	102.669	111.009	266.303	84.621	59.4689	139.82	78.3834	17.4171	27.3122	25.6814	106.938	478.955	263.391	282.827	522.538	275.435	15.4917	521.671	29.5242	261.544	9.77529	487.603	234.959	20.6532	27.0186	39.6768
A0A075B6I4	39.5115	191.713	51.8002	30.1275	258.748		180.454		94.7652		127.693	181.929	177.498	18.1859	103.949	100.053	49.9073	72.3976		179.851		131.639		82.99	16.7589	264.974	41.6907	19.5513	226.147	240.762	39.4551	231.561	20.9843	40.9122	25.2733	183.649		347.359	671.673
A0A075B6I7	15.4711	25.1366	22.0915	22.7228	43.5862	19.4275		75.5649	10.6659	49.9123	96.335	24.8787	33.2049	24.728		35.7261	22.0574	10.1384		44.9942	32.8174	22.5792	11.7301		42.4876		35.8511		23.5937		83.4357	28.0451	30.3835		84.3513	18.1014		35.6532	18.2049
A0A075B6I9	212.531	206.354	210.904	37.9479	185.754	98.6298	121.292	56.0603	78.0512	65.8578	222.471	194.22	165.222	131.75	87.5992	155.042	347.448	97.0141	97.8212	182.842	162.652	523.044	108.425	108.547	314.344	53.3877	260.542	387.903	167.731	318.99	815.066	196.476	241.319	160.462	297.511	201.133	449.359	388.619	139.96
A0A075B6J2	48.7392				30.7251	89.2159	38.6661		36.1637					34.1272	20.3292									32.7923	48.8678	10.2401	84.352			12.7866	33.6926	64.2827	62.6153		39.7615			43.8656	55.3962
A0A075B6J9	387.299	413.388	98.2371	176.669	291.01	218.455	227.107	265.159	147.639	280.632	214.856	374.119	232.639	243.295	213.588	205.984	779.718	336.036	112.889	215.959	338.921	277.865	155.712	472.102	347.472	104.161	165.583	279.875		342.223	459.349	151.161	114.074	186.896	14.0621	328.258	511.031	437.05	383.036
A0A075B6K4	459.673	611.978	735.096	486.792	235.927	568.392	663.95	754.229	666.055	698.851	526.486	755.322	664.787	595.471	485.561	1079.14	725.832	591.283	583.042	419.792	707.983	424.61	395.669	1079.17	442.332	357.658	680.818	1589.58	328.469	644.668	1517.56	484.059	718.622	325.665	875.979	922.826	569.945	804.395	541.399
A0A075B6K5	351.474	346.154	403.834	317.024	338.394	390.264	408.435	298.172	362.052	303.992	534.035	422.59	490.478	344.83	568.969	872.561	423.974	486.348	373.051	233.558	563.044	465.475	255.437	626.742	423.108	325.022	398.774	777.91	431.848	666.329	824.936	608.952	670.055	274.709	587.335	789.777	473.912	722.198	442.102
A0A075B6P5	57.2238	73.6592	31.5991	22.6174	110.016	16.6463	80.2325	41.0502	34.4127	14.0988	70.4326	117.12	122.721	65.9938	51.6712	14.7133	42.6927	47.6366	31.2684	21.2745	75.0878	110.508	42.2314	50.8676	71.7256	45.479	87.4752	122.207		51.6059	133.314	89.6344	69.5153	54.1532	88.4675	87.151	140.251	66.0815	81.639
A0A075B6Q5	1465.17	283.63	245.494	267.442	807.969	696.52	392.344	663.822	248.666	478.333	406.552	480.571	631.322	681.062	373.532	523.965	744.061	482.372	379.56	376.434		662.901	128.633	348.69	346.489	375.323	464.617	1202.7	442.762	431.226	558.868	587.093	537.947	481.567	572.501	342.472	1140.01		581.127
A0A075B6R2	163.59	111.571	148.581	183.453	81.7591	48.052	236.898	63.689	149.394	26.041	388.644	54.8878	64.2424	424.485	23.1057	409.518	122.355	34.5605	142.414	24.5659	359.619	66.0303	30.0941	27.7084	419.02	56.9955	174.888	476.588		564.5	1023.98	428.87	129.795	136.87	298.108	71.334	183.983	388.865	318.963
A0A075B6R9	438.199	142.832	221.907	45.4535	340.167	30.6131	685.496	132.025	93.5315	85.6618	236.446	237.544	490.903	285.285	163.996	173.735	86.6163	66.7793	77.9695	225.589	552.975	172.412	24.0496	442.839	612.971	307.962	595.57	1010.1		974.718	1573.25	998.313	510.329	318.918	214.13	413.063	1049.68	582.086	834.784
A0A075B6S2	4224.66	2734.9	3599	1970.55	4150.99	2599.66	3402.56	2131.57	2443.75	6239.82	3042.98	3197.1	2884.99	3767.47	2816.25	3742.2	1348.25	2040.59	2775.25	1464.13	2725.18	8971.05	2899.66	4095.61	4511.5	1962.86	3883.37	9178.6	1528.9	8488.51	4065.75	3592.29	5351.6	4182.33	4913.67	6538.44	6404.13	6150.95	4122.07
A0A075B6S5	82.9637	52.6573	21.0568	15.4845	76.5527	82.7588	61.5362	39.5308	29.2866	33.9164	24.8124	62.2998	66.4948	34.9908	35.7214	27.6019	24.3495	41.6554	30.015	39.6833	54.0584	159.399	29.2272	118.697	122.732	20.8595	80.2969	87.7004		103.421	143.994	107.108	75.9033	87.3494	82.6353	101.945	88.1312	52.5711	108.125
A0A075B6S6							13.6529					13.4142	10.9778					22.8023				53.6588		29.6929	47.8497			19.6641			25.2869	26.4851	18.9918		8.3745		32.1439	52.0174	16.8364
A0A075B708	267.859	245.725	82.4502	224.003	375.563	286.136	443.495	387.453	78.2024	334.437	258.332	339.766	289.17	659.502	142.293	281.768	55.9594	177.371	79.9346	79.2188	491.6	465.617	308.602	268.572	412.375	301.908	437.148	886.159		402.208	344.288	580.81	489.788	398.215	546.112	1147.95	689.891	688.687	386.789
A0A075B7B8	2042.64	848.745	1750.59	495.639	1597.72	774.783	3711.07	964.412	463.2	538.932	563.289	777.354	1127.57	2192.8	869.463	634.866	547.409	400.192	346.189	552.275	3016.03	2470	590.622	1542.68	3659.48	495.209	1854.23	2738.71	1993.12	2245.72	2949.92	1628.35	1793.67	1335.55	2725.39	2231.9	1541.68	3146.76	2093.67
A0A075B7D0	340.873	234.093	349.03	109.945	364.031	368.746	564.748	52.546		136.153	295.944	283.662	345.845	510.356	13.5605	470.516	205.119			270.531	429.322	429.936	302.342	289.713	381.366	302.599	609.982	149.247		387.424	735.973	431.593	463.987	341.189	728.75	418.529	566.125	509.617	372.838
A0A075B7D8	238.342	190.191	177.804	106.853	303.072	137.601	177.675	86.0579	151.056	84.5285	335.475	155.165	198.901	178.2	197.4	117.086	112.08	64.9082	88.7982	203.203	279.925	233.562	68.7992	196.572	259.831	84.4885	266.227	410.057	51.0676	355.565	262.997	384.744	273.809	124.765	205.328	246.403	355.576	367.631	239.395
A0A087WSX0	97.9256	275.825	196.081	61.8023	72.0974	81.2654	26.4853	132.736	341.299	330.465	317.419	318.648	272.708	63.0624	137.11	155.904	341.25	78.0737	51.4317	185.629	118.268	453.191	58.6875	69.879	91.5102	88.1	68.2652	119.559		118.521	583.58	70.879	109.097	47.9223	380.702	88.2831	347.003	151.796	180.102
A0A087WSY6	429.643	182.916	303.454	195.774	305.846	181.353	723.29	289.449	152.867	119.113	182.158	296.261	293.189	269.403	188.554	161.539	121.216	108.125	120.463	120.192	443.109	647.561	131.553	307.59	495.217	182.572	422.239	546.846	451.866	359.729	629.853	623.625	488.687	306.908	431.313	474.168	540.871	662.835	535.824
A0A087WW87	25.722			3.53902	4.26026				3.37624	3.96235	3.66971	2.00575	3.92349			1.75263	6.1163	4.4988	4.51656		10.3319	4.91014		5.09798	6.46197		2.68319	6.1638		5.54905	7.93117	5.58932	3.56277	4.95598	4.18666	5.70011			2.45141
A0A0A0MRZ8	3333.78	2177.75	1762.51	1266.13	3054.52	2663.67	3771.09	3423.29	2070.41	1488.97	2566.53	2790.2	2276.96	3331.34	2501.95	2224.5	1907.62	1848.94	1945.4	1396.41	4734.07	4494.57	1125.18	4855.43	4371.03	1278.23	4300.96	5289.27	859.038	3958.98	5724.15	5722.02	2117.41	2725.21	3604	5330.67	6135.29	4352.45	5108.82
A0A0A0MS14	166.782	193.7	32.68	51.1487	431.506	38.6487	441.213	50.194	104.712	22.7503	264.435	565.928	775.715	211.072	130.095	76.6924	46.4706	62.2562	106.451	27.7979	303.575	107.677	191.06	428.8	698.832	20.2404	593.665	364.495		152.729	703.135	488.512	223.183	82.8985	1419.05	1008.97	1191.26	346.756	202.269
A0A0A0MS15	437.215	252.5	232.174	263.888	433.31	414.887	264.821	245.08	383.359	486.876	238.787	229.399	362.511	331.862	228.445	534.992	237.44	209.979	199.61	288.455	503.465	545.842	119.171	485.762	487.267	269.886	410.485	782.338		599.545	619.03	404.849	585.947	470.942	110.337	313.804	296.057	1500.56	534.649
A0A0A0MT36	31.9822	58.7207		9.51226	100.261	64.4265	61.2903	102.992	48.7205	41.7718	57.3574	110.332	86.0184	152.022	139.41	110.008		42.5179	167.811	54.6468	27.9561	260.635	88.5151	209.27	248.336	10.6216	51.4368	424.786	128.237	170.716	32.7424		38.6465	122.565	139.571	301.767	87.3033	76.0749	31.0832
A0A0B4J1U3	141.848	149.963	42.4167	66.1786	162.964		47.338	114.695	37.1896	73.4566	126.847	114.31	112.458	96.4241	121.029	45.8917	168.627	93.1962	34.8895	34.8018	104.201	141.249	62.2112	57.6591	40.2844	75.1226	84.6093	87.2562		111.035	47.7274		168.182	16.7937	46.5984	29.8771	28.9661		79.2082
A0A0B4J1U7	840.661	483.046	528.505	228.326	634.677	242.224	721.154	559.198	514.215	385.691	1359.29	1122.64	1320.85	592.573	494.818	540.326	686.675	382.216	582.148	576.924	832.502	1061.49	444.12	882.44	1647.01	238.679	889.267	928.703	4169.85	1080.71	1229.85	638.963	694.553	814.366	1029.34	737.114	1305.11	2146.13	1485.32
A0A0B4J1V0	186.592	192.187	327.028	103.22	199.835	78.2117	151.033	121.824	80.5444	128.873	193.174	127.129	204.906	185.673	91.8209	116.475	109.557	34.8316	137.53	292.185	223.259	141.663	33.2802	109.211	226.997	94.0484	180.717	246.849	1252.33	349.311	265.963	83.4036	86.6002	66.9056	202.74	133.276	238.116	211.704	153.746
A0A0B4J1V2	49.1823	24.2067	24.8592	28.096	23.7456	29.5501	23.4813	47.5688	18.9637	30.8853	26.5056	28.3001	30.7016	39.6483	42.1659	34.4325	34.2664	44.5863	33.868	43.501	35.7835	47.7975	27.8166	30.3572	72.0553	33.7113	37.6998	69.9888		27.5347	95.3864	76.2993	24.862	20.1057	32.763	23.5936	30.0693	63.0477	64.8018
A0A0B4J1V6	8306.71	4309.64	3438.79	2204	4781.24	3471.44	6792.33	2953.45	2735.5	2438.75	4236.01	4405.2	5321.87	5988.31	2036.84	3031.09	1874.03	1415.4	2289.84	3818.43	8643.79	5371.93	1787.21	5553.28	8654.26	2716.59	8428.43	14105.4	1316.84	12165.5	12521	7487.63	6434.77	4643.46	9373.45	6814.47	9681.75	12241.5	8576.22
A0A0B4J1X5	508.33	261.273	141.624	452.599	448.312	336.483	331.688	291.363	226.92	643.506	144.152	306.48	81.7226	423.311	161.638	529.482	415.855	213.663	400.875	322.586	759.618	436.862	82.9358	588.027	695.557	338.267	415.602	1033.31		475.174	823.161	1113.59	227.286	422.289	29.17	786.514	612.638	1431.99	628.028
A0A0B4J1X8	791.937	333.564	153.802	171.081	773.709	217.362	1161.83	308.373	134.224	194.258	156.485	661.214	587.402	312.734	187.155	417.159	246.001	196.613	450.422	98.8123	956.32	939.32	117.597	928.417	882.513	145.248	843.251	1020.65	983.246	959.463	1509.75	1108.05	861.225	876.039	1222.15	997.987	1485.82	1427.75	1510.77
A0A0B4J1Y8	397.492	63.4651	144.758	274.138	231.18	278.418	228.035	46.6687	168.331	707.91	149.466	365.71	238.724	162.569	90.4663	241.02	291.804	162.59	141.052	188.38	266.683		274.696	64.2852	247.431	45.8995	189.623	563.874	383.587	180.194	281.583	338.436	202.297	121.65	28.9885	109.517	130.731	343.809	72.3984
A0A0B4J1Y9	122.445	31.8204	45.462	35.6009	33.5798	34.755	36.4509	39.856	29.3249	26.8893	24.7299	37.3014	41.3009	92.8907	21.3604	20.088	28.243	18.0274	14.8176	48.5916	91.8439	37.4125	17.8682	38.167	104.909	13.4007	240	140.366	111.756	107.7	82.0142	73.9257	23.9997	19.1595	173.306	60.0444	142.569	111.023	131.398
A0A0B4J2B5	3979.12	2744.63	2355.52	1743.61	3553.4	1644.86	4928.2	1732.94	2372.31	1843.22	2140.55	3069.23	3331.15	3061.8	1695.45	2880.94	2602.39	1771.93	1438.12	1740.29	4157.86	4177.69	1905.96	2899.8	3868.58	2710.94	3985.94	6153.12	2015.48	4060.82	5202.42	3859.24	3357.64	3792.99	3465.81	3390.52	5518.39	2365.83	4588.63
A0A0B4J2D9		64.9903		98.7267	45.5172	96.6095	62.6449		100.343			83.5044	93.2757				35.3763			57.9431	101.427	63.1133	55.1781	107.281	101.425	29.0988	15.4016	94.2088		39.2237			55.3335	46.4879	133.442	73.1253	82.9239		59.3019
A0A0C4DH24	24.4193			18.576	46.0474		63.5323		12.096			48.9083	26.0088	34.882			29.175		56.9571		28.0174			20.8144	15.4514		9.42224			12.6957	40.6877	38.6033	51.6857	16.7775	80.4246		21.6784	25.314	74.5983
A0A0C4DH25	1750.8	1552.56	1191.24	748.299	1569.87	1647.52	1600.65	1836.22	1263.49	1298.05	1829.08	1848.18	1430.81	2225.06	1586	1238.51	1094.37	1449.48	967.715	513.829	2170.62	2683.22	855.997	2443.62	2618.36	1314.55	2080.44	3040.75		3003.55	3349.62	2983.38	2281.98	1955.27	2098.68	2968.32	2598.6	4591.83	3418.77
A0A0C4DH29	64.9297	25.4389	25.4102	29.4348	8.11724	25.441		18.6866		26.6265	70.9015	46.5677	42.1996	204.253	58.9877	56.0237	65.5966	60.7782	59.2029	54.2668	30.9435	91.3751	39.2335	38.4698	82.3248	31.2077	56.1257	72.2213		87.8482	89.7175	79.7687	21.4825	31.8523	8.89904	42.5579	77.0936	32.4755	33.3615
A0A0C4DH31	428.931	231.223	147.57	225.383	628.439	159.841	302.81	208.058	121.091	143.963	317.021	273.325	310.285	212.953	96.1303	232.88	192.164	168.78	95.9407	133.578	358.12	405.036	177.047	544.955	643.865	106.362	394.122	445.676	726.27	481.507	560.316	450.274	569.627	325.016	483.362	363.849	440.521	1115.67	426.982
A0A0C4DH32	16.8157	7.19523	11.436	8.83766	40.3681	17.8566	13.2725	10.1422		10.8094	10.9578	18.4368	16.2467			11.5505		21.4833			29.5325	32.4869		25.2927	68.9249		20.8203	23.837	19.2662	49.3847	47.1611	42.2641	28.9915	47.4092	48.0572	24.329	57.0285	60.9376	38.4528
A0A0C4DH34	223.583	176.174	101.531	109.596	302.477	329.937	306.509	340.474	170.655	497.631	233.48	199.049	238.827	386.904	347.961	137.759	207.813	181.635	194.182	286.998	384.211	149.223	191.996	255.044	650.124	134.848	296.131	460.059	416.646	424.17	418.533	328.568	327.115	297.066	381.137	241.248	284.017	494.509	381.426
A0A0C4DH35	908.208	400.616	638.311	231.674	694.438	214.585	659.686	378.62	212.772	176.569	325.748	545.902	454.605	811.344	213.122	361.247	99.7324	232.481	121.9	381.09	747.478	787.102	147.124	772.136	1267.85	234.447	861.35	2730.14	297.361	761.797	842.711	700.136	499.638	411.419	1434.82	521.866	1288.02	1307.55	1017.28
A0A0C4DH36	6891.63	4676.36	3471.57	2782.26	3978.74	2534.19	7506.69	3478.92	4161.15	3263.65	4796.11	4566.72	5401.25	8681.25	3085.59	3718.73	3081.6	2705.99	3007.41	3976.53	6489.81	4430.24	2159.72	2223.95	7736.19	1890.64	6070.23	10275.8	13033.3	8828.56	6546.91	8959.65	5302.4	2726.1	13080.1	7073.06	7994.17	12203.8	8192.94
A0A0C4DH38	2861.99	1211.05	1190.42	1546	1510.54	2220.79	912.74	1566.19	991.838	88.1692	1441.72	2341.47	1464.59	1964.09	1123.02	1500.92	1371.37	1196.35	1436.2	1500.9	2370.71	4045.92	751.07	2620.51	4606.44	780.84	3218.78	3516.5		2830.9	1815.91	1892.93	1362.5	1882.6	695.547	2868.26	2993.29	7920.45	3668.06
A0A0C4DH43	681.329	261.862	536.348	406.142	357.199	1022.92	161.9		384.775	105.083		377.751	349.694	1010	13.522	742.596	820.168		401.163		321.09	462.883	354.197		45.267	721.27	1023.35	1134.68	102.284	408.897	61.3861	185.563	353.053	350.522	406.009	284.577	119.138	94.9163	523.409
A0A0C4DH67	46.411	39.3425	38.1743	15.31	16.9984	8.96664	76.3101	13.0236	33.8968		38.1031	20.9462	21.1659	78.5449	38.5672	35.5695	31.3447	17.1562	17.589	28.9074	49.1087	68.6574	18.4174	37.6328	89.6266	29.1708	52.4463	120.988	57.5494	37.0723	97.0149	32.6087	54.7238	14.6128	67.0391	33.1704	40.0916	33.9447	43.6407
A0A0C4DH73	157.131	110.841	44.4587	71.8412	137.142	36.1557	317.244	49.5916	83.4359	43.0699	137.058	139.509	126.965	291.888	45.2126	85.9635	54.0391	90.9326	25.6495	115.506	364.382	162.737	94.6878	149.165	353.121	62.8201	322.858	389.124	200.7	251.092	318.995	294.632	135.927	103.662	276.595	238.652	239.24	28.5536	294.193
A0A0G2JRQ6	463.33	594.168	219.615	252.295	578.622	445.774	1056.59	1089.85	762.781	347.455	442.842	434.259	425.4	354.82	307.1	298.646	191.088	743.961	554.604	161.37	445.05	757.422	487.454	541.752	1458.04	190.933	885.466	1438.21	607.862	548.139	521.097	1104.65	445.726	547.628	464.729	324.801	836.164	1105.01	1389.46
A0A0G2JS06	232.475	360.375	118.035	122.603	219.427	108.02	212.556	183.576	223.808	412.337	386.114	380.324	203.751	129.289	215.107	153.19	254.378	96.9426	44.7279	322.242	324.067	472.768	103.798	105.613	227.852	106.827	167.061	258.54	536.118	446.105	354.51	256.07	159.392	168.881	252.338	153.183	409.373	378.638	334.184
A0A0J9YX35	118.967	156.998	152.964	80.8053	107.269	75.5715	155.451	83.6983	142.307	54.9648	271.451	183.626	196.66	209.619	183.399	107.542	234.799	133.711	79.8513	98.3557	126.138	112.097	95.0628	114.512	219.813	26.4967	70.1862	164.877		165.687	97.6165	62.8966	113.955	108.235	177.713	113.379	163.195	56.494	119.488
A0A0J9YXX1	192.503	18.2263	70.8232	74.4585	171.23	31.5913	56.7865		442.013	54.1271	294.077	338.762	55.2541	593.342	194.647	27.7813	315.539	391.549	132.581	230.397	41.8343	180.585		131.356	23.4561	25.6673		346.293		364.364		44.3949		246.772		44.528		51.5813	5.14419
A0A0J9YY99	2318.71	1815.73	916.736	1160.04	1697.55	1503.69	2414.76	1603.47	1988.13	1469.09	1817.91	1697.11	1281.58	1614.09	1499.71	1558.39	1197.49	1208.93	1089.04	1226.49	2260.5	2290.46	1146.5	1637.22	2145.55	864.143	1775.75	2769.1	3802.18	2797.84	2569.32	2582.33	1388.68	1222.75	1790.93	1638.13	2509.45	3328.41	2129.11
A0M8Q6	374.607	314.394	368.691	220.5	177.843	600.994	387.109	747.308	405.14	368.897	611.561	375.667	654.801	568.034	573.991	974.804	450.801	434.676	1067.59	411.115	110.25	187.932	413.314	400.207	251.751	493.739	140.19	629.633	224.882	338.302	779.506	352.15	405.13	127.617	286.496	539.795	700.021	673.746	184.367
A2NJV5	54.0613	24.9455	78.6461	14.8348	40.029	36.2011	42.2761	23.3917	22.8782	55.5729	36.2481	40.7175	34.7813	29.9971	42.6921	65.9923		30.939	55.2584	8.80884		116.249	48.25	28.7632	37.0832	16.4831	73.5534	58.9872		186.458			46.0312	27.0569	49.2276	51.3718	68.0335		54.413
B9A064	14001.5	16819.2	9017.34	17036.4	17274.2	20077.6	18988.6	14079.7	17601.6	14916.7	10425.1	20070.3	17816.1	17555.4	12922.1	18287.6	16654.3	19205.3	20298.3	10211	21616.2	23995.5	17786.9	22507.5	22335.1	11602.2	13145.6	22896.6	36835	20933.6	24113.7	23969.6	13146.5	17962.6	14133	26587.6	16712.1	29044.1	16360.3
O00151	9.78686		12.3883	4.70157	10.0347		9.74958	21.9491		14.4788	25.2085			54.0403	30.2664			18.5977						16.1032	8.40954	5.1916	20.6818	19.1065							33.152				11.1133
O00187	140.801	110.441	88.8878	114.469	181.867	106.469	156.883	77.393	60.7159	93.8577	72.3552	81.2472	95.1915	113.174	105.402	85.2635	79.1409	83.1354	110.645	63.4194	92.6887	166.735	123.124	104.797	110.972	80.349	118.458	107.651		68.0898	118.691	82.4193	129.723	79.1446	69.8165	100.498	116.779	83.7185	141.222
O00391	171.968	136.707	129.906	146.227	171.594	184.118	172.654	162.133	289.244	145.54	144.106	148.437	129	164.139	151.545	162.717	191.376	143.749	166.327	126.173	118.101	189.04	182.938	132.571	188.131	155.553	164.469	180.558	70.9549	170.134	140.577	110.837	136.916	156.455	165.917	162.023	129.894	203.202	176.754
O14786	25.3246	18.7816		15.6642	22.1474	28.7574	21.8094	13.0136	21.5117		8.78906		35.9049	8.50292	14.0629	35.0653	9.52444	4.55513	5.507	19.6767	14.9856	3.46125	23.0409		28.2412	25.59	33.9045	45.0815		24.5623	28.808				25.0704		28.4312	16.8382	4.70092
O14791	1845.2	1807.48	2797.51	1831.74	1028.53	1013.96	1599.38	1495.68	924.959	1430.84	1342.86	1197.78	1338.44	1360.99	1927.09	1818.08	1226.26	2185.25	991.701	1338.67	1563.77	1388.67	1633.47	1453.63	1382.05	1362.66	1550.25	1874.14	1585.79	1256.71	1374.2	1455.1	1457.89	1690.88	1261.53	985.743	1429.25	1931.14	2072.45
O15439	299.218	36.4255			214.32		161.734	41.5147	84.6374	36.1746	34.1316	116.842	71.699	48.1595	32.795	40.9046	34.7105	19.4284		17.9412	108.618	221.036	16.275	118.044	174.063	20.0865	143.524	151.988		348.844	293.707	171.468	270.274	134.915	171.876	96.5096	175.273	370.894	137.432
O43324	47.8962	60.0003	145.011	108.082	71.399	63.9347	70.5142	15.9473	76.521	151.437	54.1064	77.9655	50.1914	89.2064	128.029	43.5505	47.7066	23.4426	59.4708	166.193	91.253	97.0039	32.5557	37.9033	106.393	24.7318	44.3381	73.1774		68.2932	69.344	65.46	74.6544	92.7816	82.9471	61.2953	37.651	198.298	49.1475
O43707		622.267	640.025	413.841		481.003	21.3175		691.624	856.112	530.436		657.73	55.6061	658.377	6.6955	549.052	614.002		855.462		501.363		492.912		5370.87	42.2255	6104.37		819.646		603.74	756.527	749.073	22.693		760.781	3616.34	8180.46
O43852		10.415		8.61207	30.1453		24.446	8.53712	9.74899	13.6508			10.7268	28.9347	15.9564	16.0753	21.2848	21.1915	11.9885	18.6377		10.83		18.8076									7.19967
O43866	3860.24	1470.82	4551.11	1467.64	1964.74	1764.71	2284.63	2050.16	1470.64	1940.33	826.251	2939.73	2437.14	1881.62	2242.15	1134.34	3088.74	1286.69	1812.95	3140.62	1585.5	4394.85	790.146	2110.13	2328.76	2419.58	1588.4	3045.4	2294.42	1819.76	1225.82	1276.03	2538.27	1244.36	2842.37	1207.3	2213.66	3741.83	2122.93
O60762	41.1894	31.876	38.2106		37.7758	108.68	32.4074	47.4389	14.4299		40.3191	54.4429	36.4236	128.947		62.8529	29.3439		39.9581	37.6494	36.6822	35.0186	29.9284	53.3453	63.5315	55.1482	42.6271	28.1277		61.3091	61.2511	75.8238	47.165	28.7724	46.1579	79.7439	75.7793	63.6993	42.9129
O75015	22.8774	6.65382	4.77458		16.121		12.0528		35.569	65.1212		5.74572	3.40224	12.5465	7.87652	29.0274	15.1937		15.0876	10.0115		3.76691				11.4181	26.3795	18.2121				19.0055	9.11453		8.91889	12.663	40.2352		13.3463
O75636	830.892	1025.88	939.457	1250.68	628.397	1355.92	1357.26	1048.4	640.623	1572.12	541.56	1035.6	1109.32	761.126	701.859	736.701	913.477	809.608	1590.02	850.319	973.259	1708.49	1659.15	1321.05	764.131	1131.33	885.26	1274.84	727.548	1002.71	993.632	909.886	845.017	929.16	540.619	634.423	1094.97	680.153	1357.59
O75882	484.6	405.813	512.931	515.067	512.403	346.142	404.726	402.777	381.597	478.681	401.546	370.835	455.652	461.297	453.836	413.516	380.947	384.463	453.568	522.315	569.787	272.39	451.55	432.108	541.708	377.059	538.488	582.67	285.226	461.648	456.795	360.246	583.304	567.527	482.058	400.729	590.401	390.213	697.574
O95445	1778.15	1619.85	2151.17	1670.5	645.119	1074.86	1299.92	1750.38	1124.85	1721.58	1654.15	1379.62	1244.05	2044.02	1879.66	1508.48	1761.59	2040.5	1911.94	1538.72	1902.98	1417.27	1816.63	1763.66	1227.43	2048.42	1419.17	1350.46	1306.88	1435.66	1779.56	1497.52	1790.84	1537.26	1483.44	1549.95	1319.55	2092.08	2068.74
O95497	13.6808	64.3862	61.864	49.8014	54.5502	19.2479	13.8808		82.3855		25.9995	28.4252		35.4013	70.8546	15.8286	27.809	26.1458	57.4969	67.4987				42.5908	62.5129	14.3544	6.23725	3.47976	41.9115	26.1552		36.5667	87.0053	30.9262				50.451
P00338	23.2662	38.3044	23.0358	25.6681	20.6854	23.2589	22.6064	24.1998	25.4844	24.1875	26.514	14.594	17.0638	24.6403	20.7268	35.8544	20.7519	13.9497	19.6122	37.4298	24.9585	71.6856	23.1368	36.6456	29.4142	42.13	23.3169	19.5629	39.1454	27.6313	19.9597	34.2118	21.2332	25.6577	24.7652	17.0627	19.4819	58.9381	19.7292
P00390	13.046	8.30723		14.8258	15.9084		24.4923	8.33084	18.0787		11.0417	11.1834	11.3309	9.9203	11.9197	27.0288	13.6665		17.9191	11.502	14.5711	67.8505		7.00224	24.2597	21.6401	25.3618	13.0288		15.7584	21.0626	11.484	20.3367	29.8194	7.38218	29.9346	10.2759	50.0995	14.8206
P00450	7857.25	7710.52	13412.4	9236.82	12268.4	9749.19	7976.34	10846.1	14320.3	8448.89	12384.5	10589.1	10647.9	10299.5	9122.57	9980.13	12299.8	10856.4	10815.3	8460.56	8952.48	6937.64	9529.19	8490.44	4288.64	10711.5	9611.83	8585.42	4388.4	8858.15	10463	9577.4	8538.11	8949.52	8417.18	7943.33	8008.18	7381.32	8287.29
P00488	27.4155	18.2974	21.6203	25.5599	14.6636	26.009	19.9038	39.8238	28.3408	33.2371	23.9434	30.7069	26.6331	50.8939	23.62	24.947	20.0996	18.575	21.5913	34.5871	15.0601	38.799	27.8749	21.4278	23.0244	14.7521	17.4703	32.6278	69.4063	14.6476	19.0766	16.4713	11.8665	17.122	16.3792	18.2381	14.91	75.8885	21.309
P00558		5.03207	3.72044		3.19202	12.0571	1.36122	0.868123			3.18201	1.95928		2.90826			9.35667			7.72804		2.28883		6.5907	3.81659	9.09244						2.23613	10.4264		5.15395			1.14233
P00734	3902.94	3887.48	4695.84	5215.85	3528.09	3818.87	3332.9	4453.96	4189.86	4826.39	3701.55	3882.93	4176.35	4048.1	4704.22	4568.73	5564.69	4251.73	5438.34	3817.68	4701.27	3440.85	5149.05	4013.76	3597.49	4319.96	3499.93	4124.96	4560.95	4119.21	3708.41	4451.8	4397.74	5717.24	4087.3	3790.7	3920.22	3270.91	5420.38
P00736	1146.3	1388.04	1693.24	1398.39	1246.71	1473.43	1456.76	1406.19	1423.56	1642.85	1571.45	1057.79	1098.74	1228.93	1306.19	1361.11	1523.61	1507.82	1345.24	1230.08	1320.81	1450.97	1405.04	772.791	1185.91	1410.29	1282.54	1173.79	838.419	1297.52	1259.98	1077.62	1413.5	1308.19	1389.19	1157.49	1307.55	1018.08	1119.94
P00738	84857.2	44606.8	92865.6	77022.9	98136.3	83133.4	62332.8	53066.5	16995.1	49208.4	34407.4	86763.4	84203.6	29293.8	61746.3	25120.6	43582.7	43214	78646.4	24251.6	44911.5	43412	59517.8	81680.4	35143.6	44837.4	60014.1	63710.3	51612.9	108600	98077.4	62765.1	103489	24127.1	71661.4	76062.1	47815.7	58277	59166
P00739	1399.38	1212.26	2133.43	919.91	554.178	342.065	925.444	1281.38	224.412	859.879	1040.82	838.247	988.238	664.134	907.019	1188.35	566.657	1625.44	930.198	555.642	680.43	782.433	799.462	615.805	529.415	667.23	1123.65	1215.31	398.21	685.722	1236.69	589.879	656.43	609.264	851.478	712.213	762.915	1000.84	1075.78
P00740	354.183	354.423	421.64	466.447	308.397	421.77	404.065	394.308	320.282	420.465	395.571	331.442	366.718	301.376	372.878	381.744	331.882	420.969	364.009	361.35	264.628	288.55	448.749	433.634	352.77	264.503	403.206	344.043	291.607	282.989	270.097	282.677	412.075	382.856	347.362	270.305	320.341	291.928	449.147
P00742	300.535	275.073	430.497	400.816	220.39	237.745	255.978	250.943	238.701	257.181	318.877	276.101	255.109	258.952	343.788	208.874	296.703	369.916	326.919	383.972	264.95	226.306	350.577	301.31	303.242	246.084	220.06	329.971	422.397	281.969	226.152	306.225	283.721	289.385	257.767	245.907	296.313	131.993	412.12
P00746	67.8942	84.3962	61.3668	54.5114	75.0115	53.6867	112.614	56.9025	80.0256	39.4156	49.5315	56.3616	54.1675	75.3905	63.1994	61.0984	54.6709	55.6664	66.2818	62.2987	44.1037	64.7725	43.6674	65.2546	114.62	53.5733	68.4185	47.3474		67.7491	68.8577	54.1184	74.7225	63.6561	62.2433	81.5094	65.1488	49.4283	38.9672
P00747	6937.92	8579.86	9777.61	9610.63	6025.4	7726.94	7076.11	9474.68	7566.23	8654.93	6754.64	7772.5	8015.5	7360.92	7928.18	8119.39	8646.65	9149.55	7751.36	7607.4	8314.88	5606.67	8264.72	6659.84	5921.55	7112.41	6091.88	7104.18	4146.74	6715.36	5720.11	7328.95	7516.24	8456.47	6489.33	6107.17	6514.43	5810.35	8562.81
P00748	702.963	910.981	1119.39	1178.97	938.538	983.345	456.608	495.197	388.226	459.974	720.925	418.892	434.651	431.004	926.75	867.609	943.729	751.851	507.564	482.209	867.565	431.141	546.462	660.452	690.532	933.907	630.645	852.455	388.471	1122.82	390.914	778.832	436.414	1043.03	772.765	1167.81	712.38	328.115	1110.62
P00751	6862.83	7715.32	10905.7	8145.92	12670.9	8323.66	6781.7	9264.81	10379.9	7990.26	8256.08	8653.89	8732.94	6403.01	7549.75	7992.52	9185.63	10041	8238.49	5644.95	6886.73	4700.87	7451.52	7898.02	6042.56	8581.77	6702.29	7438.75	6248.52	5621.75	7091.98	5172.3	6781.1	8002.75	5813.33	5607.9	5622.76	5724	7360.67
P00915	51.3736	118.598	64.2846	36.2737	49.0018	220.014	101.134	49.101	53.5971	119.944	28.576	51.7124	71.1979	136.323	56.2655	79.1796	61.4994	32.4043	69.337	82.5462	94.8596	632.464	97.6858	37.6039	146.652	47.1644	50.9565	34.6999	196.897	46.082	175.742	93.2985	247.758	116.282	71.3605	85.5528	184.287	80.3399	117.951
P00918	7.82757	30.8014	26.4485	24.1064	25.0439	56.3839	57.5221		12.9909	37.1597	14.834	16.9299	22.2	35.7608	11.9919	42.4795		15.123	21.2709	22.6742	28.3113	211.104	45.5054	18.0924	19.1373	18.2021		27.9747			69.099	37.5937	100.273	44.9621	18.5464	40.8677	72.9046		46.5608
P01008	4525.68	2925.22	5154.78	3978.01	4515.32	6656.88	3823.38	4639.47	6282.66	4053.01	4406.2	5041.06	5408.66	4518.22	4686.19	3939.97	3954.84	3439.2	5430.51	4637.14	4965.96	5687.15	4313.41	4171.61	3638.63	5203.05	5058.2	3999.76	5412.03	4701.93	5993.56	4727.54	3543.45	5175.97	4933.97	4762.58	4960.49	5649.31	5014.57
P01009	16598.7	21740.5	27615.5	20897.2	33426.3	22775.7	17866.6	22870.5	36803.2	26410.4	25813.5	28152	28331.8	22053.1	23146.9	18630.4	24162.6	25345.6	25169.7	19092.3	15909.9	22054.5	24482.4	18465.8	20269.3	25831.8	23746.8	19825	32536.3	25429.3	21144.4	18705.5	17328.3	23293.7	26517.9	24524.1	20504.6	26593.4	15039.5
P01011	11648.1	14027.7	19021.4	14684.8	28521.6	24524.6	10425.3	15821	15362.3	14362.2	14031	14679.1	15518.1	14372.2	13631.4	12865.2	19001.7	15854.5	19723.7	12606.3	12746.7	15510.5	14619.9	15822.3	11148.7	11236.4	14396.8	12193.8	14454	12355.8	12478.4	12347.8	12128.4	7235.52	13476.1	13608.5	11349	10284.3	12156.7
P01019	994.645	739.504	889.951	1186.72	819.45	1190.9	724.12	907.015	748.455	1155.51	490.778	696.848	692.407	1058.2	1032.88	1024.44	685.528	660.56	1027.08	848.54	1102.1	1083.43	815.073	950.666	803.566	623.518	1061.93	981.082	151.38	1068.04	1011.55	1039.32	909.87	1883.1	857.187	990.985	1067.27	827.374	1371.39
P01023	42238.4	39537	46142.5	33783.6	62139.3	103222	35993.3	60432	50553.4	46872.9	56094.6	56107.9	50837.4	104195	36006.9	44858.1	67215.2	41969.8	58411.8	57133	66625.4	69049.6	46558.1	55724.4	67522.5	63174.7	47654	37225.6	34228.2	66548.1	49713.6	54438.9	42564.2	51138.6	48576.9	65785.9	74494.4	58842.5	36127.5
P01024	30843.6	30880.3	39971.4	28270.7	40273.1	37512.3	30933.4	35386	41951.8	42885.6	35030.8	35957.3	35721.4	28461.5	33616.4	28639.7	28962.3	39047.4	34513.6	32264.8	34143.8	29911.1	32436.4	34781	30042.4	30025.8	28425	34824.1	23526.8	34180.5	28661.1	35157.7	34547.9	34759.6	30840.9	30033.7	35067.3	24878.5	40567.4
P01031	2357.82	3181.33	3604.95	3459.84	3215.2	3759.42	2763.26	3487.93	3492.51	3564.54	2465.43	2172.22	2196.77	2772.76	2600.52	3085.02	3159.85	3914.15	3004.08	2905.86	2790.17	2177.85	3200.82	3179.45	2447.23	3166.25	2811.02	2490.39	2884.4	2948.13	3259.7	3142.82	2788.43	3192.14	2662.35	2406.61	2507.42	2198.49	3130.55
P01033	27.5821	23.8674	35.6618	36.0561	78.4886	38.9744	34.5092	22.8862	43.3967	29.9784	41.0795	38.5533	43.5487	30.1176	25.2658	33.3697	40.6005	31.1467	39.0418	26.3952	22.4639	45.3588	26.3206	40.3282	46.8294	34.9305	31.9622	35.4834		23.1807	14.2208		34.1212	28.3777	32.6117	17.309	23.9026	65.4118	36.8099
P01034	64.4348	117.974	115.726	81.059	50.5062	60.7056	81.557	84.3136	83.8639	50.5168	107.881	54.5759	50.2705	86.6146	83.4844	81.2733	71.5752	77.2305	91.7386	116.403	36.1864	43.2024	64.27	34.1313	115.741	76.093	48.7182	35.9459		38.6846	30.3235	34.515	44.5254	42.8711	5.09392	61.7098	79.026	41.5547	40.2338
P01042	13366.8	11444	11812.7	11908.5	14488.8	13016.4	10699.7	11785.5	12581.8	9509.03	10275.1	9680.9	9498.56	9136.54	11807.2	9780.29	10068.9	10298.8	11559.1	9566.63	9641.86	10859	10483.1	8428.44	9187.49	9965.93	9569.7	9361.11	6548.24	9758.16	9545.31	9099.12	10753.5	11270.8	8483.32	8785.31	11465	9089.75	11954.9
P01344	161.683	120.958	124.358	176.406	73.2596	79.5699	173.379	146.306	160.384	139.112	141.689	124.896	76.507	162.842	153.699	175.367	162.494	171.175	202.094	149.201	174.479	152.297	85.7052	123.543	94.4237	131.018	194.833	175.587		177.766	91.5257	139.15	160.354	125.785	140.533	129.515	117.185	154.196	234.257
P01591	5609.6	5742.05	8555.75	3286.98	4944.97	6115.53	5904.21	6674.05	4696.23	6967.37	2836.05	5188.31	4516.01	4330.05	6232.36	3532.58	7041.22	3273.17	8508.3	6997.6	5678.08	7756.19	2490.63	4621.52	5220.22	4308.49	3089.7	4385.29	10829	4453.38	3906.82	2234.8	5475.45	3718.81	5597.77	6365.48	6527.98	7066.67	3905.04
P01593	276.005	253.715	158.325	203.058	331.268	58.2107	400.164	216.44	257.638	117.553	306.075	418.615	393.249	253.968	108.896	97.8148	190.516	175.049	145.618	192.019	436.475	528.058	183.939	526.593	427.989	295.581	505.609	745.497	90.4835	334.572	443.593	399.026	384.387	198.696	421.506	326.349	452.563	13.6944	295.979
P01597	76.6179	36.2241	24.4547	17.9132	66.488	31.1987	93.9442	11.2291	21.6141	60.7808	37.0414	64.0343	62.7488	38.8224	13.9954	38.8475	32.5266	31.5392	17.5176	32.3272	150.808	81.3564	42.2483	119.517	116.899	16.4594	127.547	242.205		82.1738	196.319	123.546	83.9197	108.374	197.855	132.559	124.531	69.1481	112.817
P01599	281.334	286.31	178.373	133.849	212.107	97.2078	192.865	123.242	115.73	178.597	212.664	158.668	82.3958	350.163	149.007	63.5725	137.506	72.3741	133.519	129.088	310.404	85.5651	28.872	153.766	208.046	147.279	229.09	259.91		231.113	308.737	279.786	167.26	100.49	153.612	186.527	178.657	332.091	238.434
P01601	54.0871	60.5259	28.785	24.857	97.4158	45.4627	102.001	29.5235	45.9396	50.9876	79.1497	95.3135	78.2285	39.1195	21.7581	43.4517	55.0708	46.8158	44.2613	21.5983	128.971	102.368	51.9717	75.0106	158.055	63.5307	70.0002	137.592		90.0535	106.981	178.497	93.9037	37.2515	103.659	71.2903	224.81	85.7585	104.305
P01602	1760.46	908.136	698.979	524.771	1101.13	450.955	1800.08	1045.95	857.267	540.91	727.282	1593.53	1669.59	1501.48	1080.82	870.892	940.909	604.705	388.192	594.616	1951.76	2322.66	727.358	1472.37	2623.63	500.439	2122.9	2408.48	5731.72	1333.42	3892.15	2408.15	1838.37	943.696	2150.67	1678.9	2835.28	2570.11	2312.88
P01619	2078.31	1587.02	1214.46	848.592	1848.38	1549.98	2776.59	1171.56	981.007	984.115	1703.46	1703.95	2267.61	2761.43	1661.01	1649.2	1363.91	1506.07	1000.63	1142.72	2427.42	2945.65	1129.35	2648.7	3220.43	1155.29	2545.19	4705.27	1500.74	3456.08	3997.39	4143.19	2361.2	1937.39	3391.07	3046.11	4557.29	4485.45	3221.49
P01624	12509.3	7878.86	7878.01	5681.44	9414.42	9482.54	16732.4	9787.5	6790.97	8185.74	6026.17	13254.2	9222.49	7516.83	7962.73	8417.3	5076.69	6304.53	4246.54	4429.25	16446.6	17495.3	6442.6	13720.8	14473.2	4810.23	12283.2	21847.9	1872.92	15097.2	19297.4	24603.1	14738.7	13915.9	8002.04	12699	17882.8	28920.2	16004.3
P01700	1863.19	2246.93	1876.03	935.654	1310.85	1211.45	2501.76	1683.34	1435.01	1848.2	2668.33	2214.41	2743.13	2012.78	1289.54	2156.34	1544.86	1493.43	2046.53	1809.52	2267.51	2325.46	1107.95	1567.84	1553.38	930.825	1869.06	3012.49	1782.28	2358.59	2447.9	1622.54	1381.98	1548.88	2399.39	1591.63	2537.64	2973.87	2093.18
P01701	1803.7	3839.76	1626.45	1439.14	1381.36	3018.71	2834.63	3210.32	3207.32	2431.11	2081.29	2263.24	2394.23	3125.7	1510.89	2893.53	1542.35	2125.02	3174.33	1906.6	1327.21	3233.41	1071.12	2727.9	2569.93	1086.21	606.223	3444.69	1070	2161.92	3950	2432.01	1847.65	1581.9	3351.64	2031.11	2976.07	5781.19	2464.44
P01703	310.477	309.312	430.182	136.449	211.914	272.92	307.705	282.063	365.464	284.412	366.663	140.525	204.998	309.09	387.271	576.222	329.271	207.168	141.489	474.716	203.174	433.488	81.002	281.105	817.799	207.898	294.241	414.199		447.398	837.774	341.265	329.106	221.009	71.1312	316.4	486.008	627.079	562.038
P01704	87.8962				170.515	97.4501		57.231		129.58	102.101	77.2874	116.605	142.817	77.6707	91.2716	172.568	92.9023	73.7136	72.7817	280.676	21.0155	47.5687	34.2892	224.807	33.4196	10.7849	88.5731		17.0725	84.0736	112.871	132.375		239.134	337.836	120.241	113.188	73.1871
P01705	48.9038	132.889		72.4015	16.8376			50.9641	53.8048		66.0393	51.1384	37.1104			77.223	38.6787			47.8309	53.6402			68.77	154.058		2.61183	6.74826			9.22231				91.8751	39.8425			62.2091
P01706	886.08	1797.39	685.372	894.86	380.931	457.494	1047.27	1409.25	1040.92	676.093	910.831	648.081	745.771	1982.57	422.371	647.361	582.797	771.514	473.963	888.66	661.149	1039.56	784.754	799.636	833.883	700.326	1161.43	1442.79	641.432	1396.03	2484.19	723.449	593.879	766.196	1140.93	940.051	1201.27	1894.12	1258.11
P01714	385.646	266.891	149.297	293.008	424.551	349.215	612.078	380.095	485.944	245.983	351.904	512.553	472.189	376.613	282.407	902.084	493.443	490.689	321.012	374.5	630.464	346.901	261.518	644.93	770.143	338.857	549.437	809.289	693.825	526.479	1249.91	501.14	582.949	493.483	536.526	570.886	673.491	1047.09	509.75
P01715	107.786	43.1074	54.4248	56.8414	60.2864	52.7956	44.6127	87.2975	48.0793	64.9384	79.8561	91.6674	110.365	73.0576	47.8623	147.935	118.798	43.5873	42.8113	96.0706	68.381	80.905	29.2276	135.335	308.333	39.2771	118.387	133.685		107.739	198.937	118.812	119.16	67.6314	44.4285	155.685	120.193	188.885	180.776
P01717	1135.72	719.397	400.517	701.793	953.957	1050.84	785.719	735.118	444.388	926.646	719.559	947.899	994.17	1037.37	906.636	1193.51	728.35	1048.98	730.98	668.125	793.508	1069.22	807.063	1081.14	1875.97	564.917	532.603	1782.49	1354.09	1384.2	1450.35	1312.05	1127.46	1107.08	979.934	814.69	1379.76	1862.63	1455
P01718	514.932	32.1391	46.2254	34.2997	105.479	43.0971	298.121	95.3067	39.6618	43.3345	47.0801	482.326	598.847	49.332	78.4672	57.0763	49.7661	64.2043	28.9022	67.6262	171.372	207.902	36.8286	303.091	352.942	35.5825	89.1515	377.86	382.347	256.589	527.709	324.607	154.994	413.334	107.794	193.145	118.858	423.804	107.145
P01721	24.8541	7.82584	34.5873	21.3984	30.6986	19.2526	26.1368	31.6962	34.9714		40.0452	32.8371	40.6427	28.5974	25.3817	89.6219	17.1714	35.3261	12.4209	44.8185	20.9372	18.8179	22.0444	44.7088	6.59074	13.0955	6.49949	57.955		42.2796	32.658	31.0616	52.145	18.5934	103.391		18.4605	105.963	22.9481
P01742	802.737	452.209	735.162	530.302	458.872	486.16	1266.39	348.246	410.147	685.971	378.732	556.503	672.807	702.869	350.71	819.838	358.504	401.42	432.101	215.247	678.428	535.093	474.343	511.36	1011.47	286.384	1473.34	1596.07	34.5312	1046.48	986.407	1213.08	596.936	720.364	1716.88	1880.78	1029.65	2417.41	1139.1
P01743	17.1877	54.3029	16.979	13.3673	30.0468		23.2981	20.2251	8.29082		49.2639	52.9839	63.7765	29.5997	29.2811		44.5418	50.2921	20.4725	5.43615	9.89279	21.6438	29.3682	38.5935	63.2025		21.8157	15.0477		17.1474	29.4089	15.9459	17.4068		19.0237	22.0374	16.9287		19.2618
P01766	236.791	92.9883	49.7494	77.7912	228.499	95.9719	371.505	143.441	93.0856	116.987	145.819	253.942	226.104	57.2035	169.668	152.311	187.414	75.298	100.051	128.015	388.506	496.725	61.7371	325.096	421.007	95.1962	466.346	503.163	836.873	600.141	752.709	329.204	702.603	420.476	527.6	502.353	839.738	564.576	584.132
P01780	4989.87	4879.74	3399.53	2067.08	4897.3	3675.8	4464.46	3922.83	3536.57	3218.93	4694.62	3920.59	4185.12	5050.74	3016.31	3815.63	3125.15	3061.26	3562.62	2284.22	6320.33	4918.81	2537.9	3397.01	5504.35	2292.65	4256.19	7510.8	6252.22	6407.52	8452.21	6138.38	4132.96	4517.02	6169.28	4828.12	8128.35	9651.13	6445.56
P01782	755.687	159.717	111.102	158.486	456.266	172.016	850.063	293.55	122.645	138.075	117.716	480.463	359.2	229.701	148.478	273.314	176.053	133.721	320.651	99.0422	663.12	563.941	81.8166	474.24	687.004	123.64	701.293	1054.57	974.571	649.255	922.339	642.758	704.916	619.89	1160.19	658.087	995.311	597.646	1541.01
P01817	627.637	278.34	164.002	235.192	381.603	394.924	120.103	422.444	152.104	236.691	657.114	391.649	393.721	87.3464	196.621	379.986	173.103	542.13	231.407	130.44	460.129	653.58	296.493	809.685	423.816	106.712	401.066	974.278	194.335	550.733	1078.51	739.196	622.484	399.355	784.753	363.83	655.242	1411.66	801.832
P01833	158.598	15.9934	35.1405	17.9403	192.827	25.4595	10.3721	23.3871	17.7619	18.9371	28.3694	18.0677	17.9743	21.5633	16.8608	9.32775	24.4606	16.5158	29.5407	26.7094	17.0093	29.3235	20.5409	20.4725	42.9132	36.3858	17.2852	31.9148	18.2273	24.9881	14.6139	40.1494	30.9456	17.0306	20.6654	19.4012	33.406	60.8208	30.6834
P01834	32872.9	15990.4	10880.8	12145	18269.8	21045.5	41361.1	19144.3	19045.5	24731.7	12102.2	22996.7	26886.9	21549.5	13450.6	16150.6	8201.95	13413.1	10944	9992.11	36131.7	24164.7	15136.3	22714.1	31388	14372.4	31533.2	40212.7	2964.76	37251.6	46707.1	41252.2	34156.7	35753.8	33675.6	24930.2	47212.4	53872.9	46140.9
P01857	56550	23484.4	20361.8	20446.8	35949.9	36807.3	52258	40604.8	37956.5	57578.5	27329.8	49813.4	48483.1	40095.1	27765.5	42386.9	34553.4	31783	31148	24351.3	44771.1	59269.4	29473.6	44257.9	54429.1	29819.4	45067.7	59542.7	3399.14	44580.3	64449.5	68630.8	37716	46012.3	57990.3	56721.4	48101.1	79800.9	47733.2
P01859	7571.64	20281.6	9165.76	11275.8	12649.9	20251.2	12137.5	16056.4	14225	17099.8	9328.5	7513.76	7852.15	18524.8	12866.4	13492.5	11935.8	11616	9267.76	3120.16	13036.4	14773	10993.4	8099.72	9554.02	10248.7	9418.03	9446.4	4111.87	12974	15368	14425.5	10149.3	9260.35	10821.6	10883.7	14743.9	15460.5	10807.3
P01860	55516.6	33102.6	29919.1	51354.5	35364.1	73585.5	51115.9	65152.9	59837	77568.4	57331.2	58629.8	56841.4	43362	37948.4	55504.9	26815.7	30014.5	41190.2	36773.6	68351.5	54378	47734.2	44971.3	38015.5	41823.3	38797.7	36334.9	17215.3	58454.6	56737	61016.6	45765.5	43460.8	54218.9	42763.3	45411.3	74565.3	35409.2
P01861	14038.5	5293.34	5499.36	7370.4	12103.6	16742.1	14108.5	10922.3	9527.1	5326.69	8130	5934.66	5895.39	3723.48	4973	3134.18	3513.71	8511.78	4790.44	4562.09	13554.1	6822.75	14269.3	8879.44	32571.8	5735.92	21272.4	35202.4	11935.7	17969.6	23145.6	26971.6	18886.3	11943.5	11924	45077.9	12173.7	8140.67	10458
P01871	50302.9	18786.6	60706.5	17261.2	24386.6	20508.8	28997.7	23365.7	22007.6	34995.5	11364.8	37054.8	33992.8	22684.6	29775.9	20133.4	41499	18928.1	24272.4	42000.9	22804.9	48669.4	11399.5	27184.7	27524.4	37860.5	19875	41920.4	14718.1	27238.2	20489.4	21712	35889	20237	37397.8	15522.1	34515.4	57288.3	27744.3
P01876	14731	21062.6	14329.9	26694	21369.8	23804.8	17524.1	24669.2	24695.8	16281.5	35952.3	24154.8	21043.2	20162	26774.6	19823.7	13285.6	28496.2	19108.7	26755.3	34688.7	14754.3	28433.5	35431.9	36099.5	11209.1	20888.3	40358.4	19195	29089.9	33714.8	23472.8	31757.7	25880.3	23431.5	63824.3	21841.9	41769.8	34449.8
P01877	47262.7	58524.2	36172	23564.1	62418.3	68389.2	72742.7	49145.5	36944.6	42319.9	64249.6	48367.6	48472.4	26902.3	49647.3	22906.8	16707.5	46197.7	21756.3	34553.8	78176.2	45377.3	40854.3	88244.9	157196	20146.8	77448.6	90062.4	95359.8	123940	93477.6	79619.6	75648	48721	66806.6	73596.3	90323.3	153710	84379.9
P01880	80.6395	4.18742	374.204		591.923	117.02	157.285	195.448	713.139	30.8032	49.0575	49.1442	41.1263	112.406	403.921	139.146		665.762	152.145	96.1248		792.248	340.536	124.705		42.9877	49.3676		249.73	92.1468	162.584	105.974	132.654	87.1175	42.7761	130.655	336.316	345.307	33.5884
P02042	118.42	451.898	144.812	103.517	254.013	585.198	289.784	121.954	156.366	352.07	178.385	249.763	242.868	448.842	154.526	307.925	206.348	129.113	214.662	417.771	381.688	828.5	365.785	143.27	509.632	256.548	107.19	94.0588		118.918	447.175	209.958	890.554	409.19	140.778	332.599	656.519	179.016	379.89
P02533	273.067	43.5164	40.2247	245.058	56.8327	1197.4	46.3939	138.492	89.5709	210.578	156.162	99.0138	83.0233	71.0233	443.375	195.236	126.21	44.061	62.7212	15535.8	97.0604	1047.17	94.7247	69.1289	85.152	552.642	580.297	34.5769		40.2047	74.9819	188.383	253.644	285.398	95.4886	299.651	32.9472	470.901	42.3268
P02538	425.79	42.106	84.4998	410.87	87.5556	1667.95	66.2883	104.132	242.16	328.021	264.531	64.0893	168.245	116.24	787.183	385.799	175.124	59.4989	86.7719	32568.2	167.879	2171.81	161.956	93.2134	160.447	788.942	926.664	39.5546	1147.99	70.5254	110.187	336.99	295.698	415.224	527.607	386.034	23.8194	621.373	31.1974
P02647	100343	120321	112565	135147	53494.5	133512	108791	147675	139209	138762	122306	108384	107297	132654	120144	122477	139906	125863	111117	103749	152418	105061	121392	93329.6	99249.4	159370	109345	104140	73590.4	159013	141507	122428	101334	125496	111687	109476	144630	152778	126554
P02649	11398.4	6805.52	10568.9	7274.42	7156.47	5782.54	10346.8	5457.81	6914.63	8580.96	8958.84	7697.2	8017.69	8536.64	7305.17	7287.33	11962.2	6690.82	11849.7	8014.67	7207.71	8855.07	9721.4	7936.04	7481.49	8923.71	7572.2	6952.02	4685.4	5807.24	4492.91	6324.41	9943.28	4168.74	7154.63	5903.5	8571.08	8087.28	12335.1
P02652	36885.8	23347.8	25513.1	27158.5	8015.66	17813.3	23818	22317.7	27307.8	44146.2	29051.6	26449	26026.6	28464.4	43059.5	25203.8	24786.7	38509.5	16186.7	21617.6	54352.9	35953.3	30120.7	19273.4	30689.2	35085.8	22976.1	21508.7	35154.2	39286.9	25248.9	22520.5	30065	32154.4	20424	27379	25603.8	22414.2	48687.8
P02654	14016.4	10417.3	15269	12036.9	3955.47	7644.83	9787.1	9773.42	8682.56	16147.2	13851.5	7630.26	8354.77	13392.5	12375	9691.72	13418.7	10802.9	13007.3	10179.1	9784.93	8425.03	14817.4	7741.83	11176.2	18624.1	7283.28	8029.2	6948.98	10030.2	9334.34	7675.95	15136.3	9087.49	7070.93	6341.24	14766	9509.93	14860.6
P02655	6389.87	3777.82	8032.53	3433.23	2517.52	2317.98	8465.12	3052.86	2903.84	5223.05	3305.77	3321.66	3678.69	3615.94	6887.17	2583.36	4097.25	3485.37	6693.04	6255.05	3064.3	3110.11	5548.77	4884.38	4229.37	5053.41	2671.28	3786.29	4063.21	3352.23	3154.49	3744.48	7157.6	3881.12	3427.3	1443.33	9092.64	3942.47	10895
P02656	2075.61	2020.72	3242.8	1834.04	729.768	1600.59	2864.24	1455.51	1417.08	2430.77	1119.19	1525.82	1621.12	1428.45	2289.24	1967.15	1950.13	1513.44	2474.07	2764.84	1883.78	1704.21	2277.41	1940.02	1662.14	1792.27	1886.5	1420.62	52.9356	1441.99	1421.85	1941.14	2196.87	1344.54	1333.43	878.254	2485.23	1990.26	3434.65
P02671	1410.71	1914.21	1628.72	1747.98	1901.5	1569.24	1574.66	2317.27	1930.12	1858.79	2090.64	1586.04	1774.1	1656.94	1826.1	2233.46	2070.79	2450.59	1884.7	1215.4	1643.95	1891.97	1686.83	1925.2	2313.8	2513	1980.65	1454.6	2190.37	2201.58	3604.57	1771.18	2324.73	2456.92	3927	5084.98	3180.04	1516.65	1490.65
P02675	10.5947	14.3433	5.25269	14.6946	28.9271	31.5746	10.0879	17.4825	32.848	18.0501	12.9557	17.3742	14.8987	11.51	10.0314	23.5603	11.6908	12.0874	9.15453	13.267	11.1771	17.6365	20.0384	24.8267	13.4203	25.0278	25.4666	16.3276		9.10592	25.0339	17.4714	10.6111	11.0613	19.843	33.5065	20.3446	29.6911	10.354
P02679	11.6543	19.5963	16.9329	20.6565	40.7142	43.1838	12.0994	24.9817	53.7339	26.8478	21.5007	19.9824	31.2162	21.9554	12.8397	37.8206	17.6329	15.6326	15.9545	23.393	21.2183	16.0459	30.4215	37.0292	16.468	39.0199	30.3999	25.4616		14.8491	45.6353	23.5453	15.0144	11.3453	40.0212	51.5077	32.4905	41.9038	11.6539
P02741	19.9832	27.5448	97.2774	25.7864	1945.28	565.657	126.746		115.871	343.234	96.5373	67.2578	37.5003	20.342	53.6453	95.7258	40.0128	459.542	18.851	17.211	31.7693	20.0877	15.0189	1737.91	46.5497		65.1006	55.3878		31.6294	126.112	25.0456	52.8329	23.7892	7.74612	19.6921	16.0186		33.3765
P02743	2309.29	1600.15	2224.14	1767.49	1556.02	1144.67	2634.3	680.736	1585.93	2500.47	1235.66	1798.25	1680.53	994.407	1603.87	1755.81	1258.18	2727.97	1835.99	1050.04	1483.55	1201.07	2035.9	2685.21	1899.28	1665.48	1969.44	1992.28	973.843	1651.49	2826.51	2319	1413.53	1930.18	1200.87	1840.05	2052.02	562.987	2255.3
P02745	1603.22	1645.38	2270.97	1608.99	1327.36	1882.74	2260.74	1828.37	1925.64	2221.88	1813.64	1211.9	1294.43	1678.28	1564.46	1878.58	1486.05	1332.31	1444.37	1691.95	1680.67	1824.16	1285.69	766.904	1481.68	1918.52	1500.79	1209.47	584.365	1775.9	1720.11	1565.21	1655.13	1668.47	1638.65	1498.84	1856.26	1863.7	1459.85
P02746	3030.09	4078.3	4239.81	3878.9	2963.81	3910.29	3706.53	4165.31	4066.87	4241.3	3851.62	3317.68	3417.56	4150.69	3384.79	3289.51	4148.36	3896.03	3395.5	3252.77	3814.87	4422.35	3769.27	1936.09	3609.23	3017.2	3386.42	2787.74	2126.18	3299.7	2491.97	2201.78	3495.73	3678.68	3219.14	2389.56	3451.07	2688.69	2702.64
P02747	2991.22	3284.14	4196.55	3834.43	3649.74	4023.94	4065.09	3801.85	4249.77	4272.75	3768.88	3309.25	3174.22	4062.04	3398.61	4036.24	3807.63	3171.99	3749.36	3264.45	3990.22	4394.71	3755.97	2144.76	3231.5	3654.17	3546.67	3273.09	521.827	3382.6	2995.09	3012.93	3392.44	3793.07	3036	3190.4	3449.89	4024.57	3047.8
P02748	2168.71	1257.44	2847.28	1847.63	2879.38	4035.41	1951.2	1816.03	3951.4	2405.9	2410	2504.27	2726.34	2253.62	2006.16	2359.52	2680.24	3645.84	2898.22	1653.31	1582.42	2278.83	1796.46	3193.03	1962.54	1992.99	2232.46	1815.5	1741.14	2146.82	3398.1	2026.88	768.919	2405.98	2152.52	2581.36	1887.98	2033.83	1252.06
P02749	10585.9	7980.32	8047.81	9803.6	6499.87	8450.84	8846.78	7357.29	6360.76	4823.29	7819.64	5617.07	6264.05	5652.06	4752.66	4081.74	3350.73	3213.41	5230.35	5721.78	7851.25	5288.43	7078.45	5783.55	9130.48	5542.11	8201.15	7103.91	1810.02	9318.46	6628.6	6636.56	8392.28	10230.6	8378.38	7789.21	9182.49	6664.96	9866.79
P02750	1098.2	634.061	1005.35	716.74	1818.35	1439.23	952.194	1506.42	1374.13	1017.32	848.349	1252.03	1228.52	1278.5	941.581	846.668	1138.06	1208.43	1237.43	694.466	793.629	1352.94	761.085	2011	818.898	694.783	1235.74	1056.52	367.941	1122.91	2103.61	894.239	965.614	1130.05	1081.88	1040.78	765.214	1339.52	721.954
P02751	3583.69	4870.77	3772.64	4340.72	2381.36	3173.71	2756.37	3181.04	3414.21	7152.67	3667.22	3438.78	3339.31	3651.18	4154.94	4107.73	3156.24	4543.25	3559.18	4118.75	2003.56	380.266	5715.36	2444.04	2345.29	2717.15	3607.46	4331.48	3570.56	1723.33	862.175	2317.21	488.84	708.964	465.59	630.575	970.288	2800.06	476.526
P02753	6742.37	2806.84	3152.84	3272.33	3043.74	2121.81	6670.77	2699.47	1809.46	2997.86	1913.37	2683.93	3130.66	2609.9	3126.48	1675.65	2000.34	1604.12	2391.94	2516.22	5313.36	6185.01	2649.23	4536.45	6277.5	1682.12	4403.85	3938.97	1473.49	4130.83	4192.06	3546.01	5844.12	7347.58	3916.29	3479.6	6493.9	3529.94	6354.42
P02760	4620.64	5262.46	4693.76	5514.59	4113.14	4958.96	5115.28	5674.56	5708.88	5298.6	6835.99	5319.84	5004.85	5632.8	5561.22	5052.34	4231.24	4995.18	5716.5	5581.54	5212.24	5255.49	5448.69	5339.33	7197.35	4896.97	5041.04	5406.26	3703.39	6560.94	6209.87	4272.72	5929.75	5769.87	4234.31	4581.3	5061.89	4091.92	6389.59
P02763	5711.98	4228.34	8945.13	4943.77	8323.86	7642.84	4416.95	5925.77	6736.44	5938.26	5002.04	6255.59	6113.3	4112.98	5770.97	5096.15	6540.12	7198.13	7116.73	4936.23	6098.76	9231.85	6729.74	9479.96	4946.25	4303.31	5627.25	5972.47	1464.78	4857.55	6943.91	4878.5	4947.96	5848.02	3542.47	4535.67	3914.88	3844.52	5428.15
P02765	2823	3491.84	3553.2	2932.66	2121.86	2347.27	2551.33	2569.48	3509.06	2988.71	3568.08	2082.57	2459.95	2842.83	2284.26	2428.18	2023.78	2731.18	3001.28	2406.43	2854.96	2824.09	3079.74	1781.95	2695.33	3073.45	1530.75	2452.75	2148.87	3044.35	2740.9	2519.34	2567.17	2893.49	2284.77	2612.37	2952.2	4156.24	2039.83
P02766	1092.47	1260.07	1909.76	1380.64	343.938	396.833	1379.75	1004.26	934.093	1046.01	1007.49	785.735	917.76	913.333	1451.76	956.649	1597.48	1041.74	873.591	1030.8	1020.2	612.675	1714.02	516.985	796.702	1257.07	737.697	559.57		496.866	436.386	370.355	764.665	425.383	648.136	462.565	687.585	321.701	637.095
P02768	122169	120852	108398	102481	109411	96085	128481	137712	121052	130760	101420	113430	117464	115191	111300	101663	110443	98373.1	103680	98193.2	123917	134530	107183	91440	112011	105055	108085	108836	91071.6	124319	130572	118288	113645	132244	115425	133060	144266	125246	113857
P02774	22152.1	21739.5	27922.4	25281.7	18066.4	16875.6	17411.4	23683.5	27016.3	23814.2	22091.9	22683.5	22736.7	24528.8	23854.8	24101.5	25670.2	23202.1	25439.9	20227.7	22261.2	20633.9	24868.3	20099.9	18203.5	21621	20475.2	19404.8	21898.6	21578.3	23099.5	20078.6	19839.3	21291.9	21599.7	18937.2	20393.7	15976.6	24954.3
P02775	583.537	1003.1	957.109	996.336	1078.09	351.783	763.623	678.897	731.104	927.682	891.456	839.032	662.147	821.297	933.403	630.809	1207.67	1096.17	886.835	527.038	770.326	531.554	956.505	779.695	664.426	738.942	776.799	505.478	1074.51	773.46	324.884	559.969	860.866	872.897	551.794	487.839	663.401	525.162	940.897
P02776	554.444	386.71	386.267	563.034	867.062	140.208	827.848	229.206	260.841	734.327	290.565	420.006	389.548	447.077	444.423	281.76	581.647	454.131	642.614	182.942	739.21	402.188	574.202	465.665	520.981	170.654	727.624	609.049		691.853	369.458	424.367	592.037	1026.65	31.4558	568.524	768.38	1212.5	890.647
P02787	51869.6	36087	57736.1	49480.3	45494	42483.4	49769	54696	53805.9	49759.6	31048.6	52161.5	54734	38369.7	48607.6	29196.1	32470.8	29778.6	45366.4	45675.8	60570.1	49265.8	31088.4	48080.5	49870.4	22913.1	55919.9	51518.8	22520.9	55047.6	57463.5	69830.9	55704.1	71773.7	62761.6	49727.9	68274	85946.6	66834.5
P02788	181.671	409.076	802.208	1221.44	246.329	314.246	141.552	343.904	621.93	550.022	602.362	414.339	394.275	340.033	482.036	424.715	389.576	223.595	492.562	1110.29	302.378	90.9414	365.213	87.2963	175.473	370.888	143.63	246.367		159.303	101.462	183.16	137.571	150.918	16.7141	155.435	134.831	198.056	137.381
P02790	30703.2	29401	36975.2	33830.8	28958.1	43366.1	28236.7	34694.1	33727	38931.4	26684.6	31304.8	31105.4	31761.1	35552.1	30820.8	33993.5	29709.7	46167.9	31304.7	31530.1	26637.9	32241.8	31789.3	26538.5	27845.8	30870.6	29864	2254.43	30734	34412.5	28042.3	28107.7	38317.6	28291.6	27046.4	34201.7	25572.3	29873.5
P03950	17.1295	37.1383	25.3428	36.7231	38.2026	33.3383	35.3255	19.2041	36.9919	26.6428	21.7543	16.13	16.8661	10.4398	23.476	21.1705	18.8562	17.3823	15.9223	28.6585	17.6498	15.9545	30.7077	25.7335	24.6591	32.7563	29.7199	20.5781	45.5877	22.2213	10.5273		25.1869	16.17	19.1387			21.0285	30.9722
P03951	139.691	132.146	166.061	214.149	176.706	130.629	110.239	191.922	195.581	107.582	167.112	139.757	142.074	95.2668	196.746	179.138	142.12	182.224	146.249	131.476	179.806	131.762	195.79	166.284	69.3836	50.9686	159.308	142.355	237.186	146.072	141.968	136.731	178.558	166.862	145.785	138.429	177.133	130.662	207.595
P03952	988.539	1076.51	1045.31	1174.38	656.435	793.407	842.7	984.161	841	971.103	801.641	852.53	880.424	882.015	1183.59	1233.21	1281.39	945.713	1111.32	1005.21	452.756	686.218	995.971	750.779	666.324	925.829	939.558	1050.04	905.614	910.92	765.988	926.704	1006.5	1123.13	704.298	628.202	1106.11	881.406	1311.31
P04003	7955.93	7350.97	9441.18	8450.89	7422.77	9397.67	8385.14	8349.35	7561.52	7965.65	7929.72	8095.1	8529.77	7165.09	9165.42	9142.4	6576.93	9081.76	8748.8	7777.14	7753.16	6641	8291.96	8592.58	6893.33	6358.85	8994.49	9270.56	6902.77	8730.23	8145.24	6799.32	9603.93	8875.47	8787.5	6743.45	7382	5213.08	10323.7
P04004	6782.15	7856.73	9132.91	7509.41	6993.39	9070.47	6498.92	7304.95	8157.21	10244.9	6385.47	6603.18	6746.74	6542.35	9119.78	7621.79	6909.91	8210.55	8332.74	7602.25	7433.19	5077.77	7756.78	6618.29	7359.97	6968.72	5767.99	7053.74	4267.97	6301.5	4571.3	6325.97	7474.21	9516.05	5893.15	5324.9	6368.75	7341.25	8482.52
P04040	22.7434	18.0784		15.5939	18.8462	41.1208	21.6749	14.6043	15.4131	32.8886	14.5082	17.0648	14.7141	23.7045	10.5215	18.659	17.3775	15.055	18.9866	36.1099	13.2853	41.1241	23.6656	20.0406	18.3738	28.3327	19.0104	11.9361			21.741	15.5266	31.766	18.545	20.7007	17.972	29.7165	7.79871	23.0933
P04070	136.504	159.003	191.876	193.521	102.807	124.132	150.719	153.922	121.707	173.467	140.35	136.426	169.861	142.226	203.988	156.236	201.943	196.738	176.595	146.304	124.05	109.296	216.315	135.322	155.863	134.049	142.471	176.789	406.012	126.538	121.706	182.311	165.237	195.956	157.62	125.493	143.551	75.3248	219.215
P04075	10.4523	40.5499	15.9541	17.2909	9.07831	9.84442	17.8994	16.6332		8.76217	9.18434	13.6968	7.34923	11.3121		15.001	16.5086	9.74918		32.5177	14.5645	26.1909	7.98351	25.7429		21.3872	9.98866	16.1447		7.71331	17.4016	14.2154	7.03366	12.5752	15.8185	9.98065	12.9751	14.3935	12.1152
P04114	10828.6	5901.24	6876.88	8582.79	6940.42	3724.4	7905.61	6294.98	4067.52	9792.07	5220.23	6728.9	6611.94	6940.51	8445.36	6658.42	6386.32	8690.97	8623.1	4226.87	8417.32	5643.31	10158.1	8155.54	7305.5	6262.75	7259.13	6517.49	4262.73	5535.39	6564.22	6386.82	10966.8	5320.03	7238.81	5646.12	7310.99	4789.95	9124.12
P04180	254.135	346.16	390.229	349.06	151.286	284.636	246.894	258.653	231.013	318.732	315.448	234.271	277.334	282.02	387.162	278.951	326.98	289.164	317.664	309.596	312.478	199.68	384.271	240.364	274.335	306.274	253.241	289.192		303.481	143.389	271.001	266.516	342.95	174.202	218.053	295.229	174.972	343.325
P04196	3331.63	3240.64	2422.88	2524.58	2671.4	2937.68	2178.79	4029.92	4541	3452.49	1920.74	2732.64	2869.81	2533.27	2715.06	3329.96	2079.63	2846.4	2557.17	2405.37	3475.45	2049.17	2289.18	2779.8	1966.02	3799.09	2168.08	3127.65	515.713	3270.78	3050.75	2012.11	2368.95	1527.91	2345.15	2878.78	2390.07	2110.56	3000.76
P04211	1364.25	2184.24	918.023	990.308	1602.98	1864.73	1611.86	1101.3	1297.82	1378.24	2005.99	1350.49	1332.52	1711.32	1145.53	1545.73	2039.94	833.182	756.873	1063.43	1617.41	2920.49	1240.72	869.133	1237.19	630.13	1762.89	1619.81	461.913	1744.6	2287.84	2234.87	1474.04	1121.47	1938.43	1313.78	2492.34	2994.88	1044.81
P04217	8985.65	8854.73	11864.2	9079.15	9535.94	9277.8	7815.88	9146.84	11728.3	7047.49	13063	10744.5	11057.4	9383.82	9479.34	10857.8	10088.4	10255	9825.87	10425.6	9458.39	12077.2	9602.83	10275.6	7680.72	10471.2	9719.79	8992.3	5150.1	11508.3	11948.2	8701.54	10412.1	10295.6	11819.9	8555.16	8130.61	8887.83	11582.6
P04264	539.951	70.1985	111	855.053	107.652	2611.91	90.0706	253.24	262.115	509.955	299.482	132.752	159.733	140.882	1018.56	611.166	254.611	87.3331	124.411	25749.7	387.005	2830.39	215.632	147.208	135.909	850.63	1015.42	32.0099	508.042	77.6932	140.096	560.307	475.083	440.106	847.902	528.902	41.7869	985.377	38.4829
P04275	168.011	222.756	83.2674	212.297	176.982	684.757	191.411	172.062	272.634	352.869	453.893	169.381	187.176	71.3428	147.134	258.505	219.767	335.265	164.956	148.076	103.026	104.954	152.536	238.236	100.427	310.91	209.638	219.24	313.654	102.373	62.9607	99.0116	54.8901	30.7979	87.0455	103.268	87.7342	185.703	48.0805
P04278	97.7039	105.086	94.9298	101.522	115.795	148.917	50.03	106.91	117.204	111.788	495.564	156.893	167.101	324.935	72.2793	88.4597	163.221	117.528	247.125	98.7717	101.854	272.541	95.5	96.7889	92.5268	480.591	251.995	78.175	65.8625	280.261	189.946	84.8226	113.212	105.646	221.94	229.733	144.266	318.362	49.8996
P04406	9.09203	52.8454	5.77446	2.73591	5.38024	5.66376	13.4529	4.33651	4.23027	11.5017	6.81704	9.95886	3.56641	21.7288	2.60495	11.8434	2.6973	2.95886	3.84782	63.9109	23.544	12.5194	5.2742	28.732	10.1491	40.7519	7.81013	5.93356	74.7684	6.2444	6.01651	10.6989	4.99939	3.80772	26.7291	9.23652	3.9145	26.1462	4.41867
P04430	64.2751	34.5366	15.1541	24.5539	136.444	65.2377	26.8179	37.0686	33.8588	18.9451	29.8131	35.0267	38.4653	50.0672	27.0198	51.8515	16.9688	31.7999	43.8683	25.6764	19.3672	95.2586	36.1378	45.3137	101.875	22.215	96.3793	183.817		117.527	107.558	95.163	22.4829	57.2697	106.468	128.996	121.9	82.7016	43.5228
P04439	141.742	7.35042	13.9747	20.3969	20.7351	10.2088	11.4725	8.25107	33.96	13.4883	20.4873	24.8696	41.0995	4.43038	11.1206	18.0126	23.2713	8.41248	11.4881	4.29062	11.8267	30.9594	14.3873	9.15098	5.59221	20.8733		67.7503		8.39632		6.76855	9.04922	29.9259	2.43259	36.0891	8.27387	37.8764	35.5812
P04908	2.08854	30.0131	6.34076	7.78452	10.3418	11.925	13.8346	6.13402	6.65397		3.26668	9.33914	2.05315	10.0501		18.9594	7.252	9.07916	14.3909	19.9298	9.24298	7.92807	3.55668	13.0878	4.21664	15.4357		8.84921	50.3915	5.11097	11.7656	9.38122	2.21319		5.49043		11.8778	32.3026	5.69942
P05019	18.4992	15.8154	15.8136	15.8301	15.7582	6.31115	13.7541	13.4261	13.5714		8.88453	10.0021	17.6702	7.83919	21.1361	16.9956	12.1532	10.5657	11.4401	10.3922	4.85303	5.70513	26.2273	5.57568	5.1342	12.547	9.87748	29.1778		6.81379	12.279	7.13801	8.34924	19.9578	10.1196	5.18709	10.1857		12.7201
P05062	432.698	452.416	396.16	480.83	1068.17	2185.52		359.68		575.726	527.165	573.074	324.004	92.1145	635.964	806.238		466.814		807.965	325.373	495.614			691.369	251.289	60.5497	207.382			296.822		685.067	570.236		163.967	394.65	2082.74	685.777
P05067	16.6713	12.1105	13.2888	14.4632	22.485	5.70456	21.8882	9.3733	14.5364	11.0338	7.77341	15.1214	15.6986	24.3155	12.551	21.0802	18.5508	10.6397	13.6057	4.47243	9.2843	9.73625	16.8529	9.83163	10.543	18.0067	15.335	17.338		16.5274	7.81559	12.5641	11.9596	16.8245	5.91994	6.9331	7.43731	10.006	22.4988
P05090	5637.44	2827.35	2661.61	3660.32	5381.13	5003.61	5038.14	4810.07	4389.32	1861.37	2203.46	3277.94	2722.98	3318.87	1948.47	1506.12	1593.6	1384.79	2414.62	1274.25	5272.67	4792.84	2951.37	5443.39	5909.78	3967.5	4324.04	3957.92	5593.87	6504.55	7216.49	4688.84	5685.34	5703.23	5585.99	8370.88	8973.73	9930.31	5597.09
P05154	41.6697	65.4193	43.9139	39.5029	32.3346	43.0082	35.4474	56.9627	38.0153	70.904	82.9	50.626	43.5605	48.0997	45.9202	69.6938	44.6853	48.2243	64.1844	51.7967	43.5859	64.6001	47.044	26.2506	51.3603	47.2803	73.8648	50.8464	221.218	49.6334	52.8439	41.9247	48.9506	60.078	61.6477	63.3633	54.411	53.8782	51.9569
P05155	8205.62	7672.31	8273.71	9468.53	9049.8	13483.7	5781.09	10345.7	10038.5	11535.9	11573.2	9646.28	10234	11450.1	9163.43	8879.07	10145.7	9182.75	10779.9	8850.36	7632.17	8876.21	9996.36	10410.3	7299.84	10677.7	8286.19	6601.1	7057.68	8835.92	9688.55	6565.94	7710.88	11664.4	9517.68	7487.29	8129.33	7568.87	8201.71
P05156	524.055	912.042	1190	828.524	782.61	1317.92	684.919	677.138	849.803	1187.32	780.36	699.724	758.776	806.223	714.923	759.205	835.24	1036.93	888.505	674.033	613.789	550.985	760.31	814.942	693.13	635.407	631.188	720.201	539.967	740.334	680.786	639.843	706.642	907.067	594.365	511.239	661.394	518.52	854.989
P05160	256.459	178.722	212.111	241.69	325.831	150.821	268.776	207.764	118.793	88.5168	306.146	182.567	214.961	225.632	159.476	93.9479	102.378	96.3026	125.032	134.379	227.109	214.325	120.046	190.256	250.252	166.683	235.327	233.81	45.098	213.715	205.672	187.691	233.013	230.404	179.112	182.472	174.964	238.792	236.742
P05362	12.788	6.49104	7.21735	7.62966	50.4948	19.3531	13.1948	9.56654	9.8984	17.2713	11.6951	7.2536	4.99386	12.3969	11.4525	18.964	3.71555	7.2041	18.0359	14.6279	3.30281	11.965	5.74913	10.5651	15.8408	14.6088	13.8011	7.25587		13.999	11.4506	10.9135	9.85161	13.4769	9.62835	10.4217	9.61234	26.1162	10.0339
P05452	402.258	456.844	334.702	469.234	299.034	326.258	343.701	443.628	467.148	454.002	585.272	444.057	379.204	494.823	475.014	635.67	484.825	359.757	519.65	430.686	398.084	367.604	454.201	307.43	275.513	504.307	306.739	358.177	217.026	491.332	351.18	347.491	351.9	411.479	361.155	441.837	383.2	494.031	342.767
P05543	487.822	455.072	369.975	344.794	534.68	455.674	398.893	313.683	351.502	350.983	258.554	476.334	480.887	479.081	358.791	363.668	360.478	376.218	486.974	348.29	545.044	636.714	361.992	590.734	586.865	335.62	614.947	683.084	224.867	714.048	619.932	539.992	420.804	834.646	699.688	728.024	507.1	732.064	395.015
P05546	4536.59	4162.8	5456.5	4127.24	2431.32	3798.13	2654.51	3019.73	2487.42	4236.36	3500.82	3368.73	3155	2924.11	4626.37	2771.44	3457.63	3773.73	5453.98	2950.96	2847.18	2105.2	3730.93	2355.96	2080.79	3391.73	2868.08	3170.57	805.441	4345.07	3106.52	3082.56	3576.01	3247.2	3153.92	2720.01	2874.03	3067.08	3467.1
P06276	525.751	390.837	433.298	421.379	214.765	269.847	245.17	278.637	342.918	446.863	366.636	290.902	264.539	433.531	394.821	392.785	388.075	395.177	412.745	469.358	347.558	268.694	432.007	254.923	345.248	343.114	279.635	304.266	888.368	331.414	278.753	337.02	260.766	395.619	240.987	244.143	364.498	317.688	468.291
P06312	2580.15	1176.89	971.923	642.628	1899.55	1264.52	2192.91	1191.96	1126.9	1167.75	1140.58	1759.26	1736.9	1563.53	1053.59	1098.77	1000.6	860.678	789.119	869.172	2006.5	2403.6	886.287	2212.13	2808.7	642.581	2514.71	3725.32	1547.01	2314.69	4396.98	3666.75	2549.97	1962.07	2703.29	2320.57	3924.81	4027.19	3301.91
P06331	519.279	262.686	167.307	216.652	377.34	285.578	492.423	368.192	155.571	315.159	230.718	359.423	419.076	481.118	398.409	443.992	289.137	287.442	449.996	314.404	683.687	547.039	124.735	436.904	1050.36	145.961	623.887	649.089	2477.94	506.786	716.753	623.597	490.581	535.245	394.216	831.966	279.907	1277.52	971.086
P06396	2654.66	3946.44	2851.24	3335.44	1854.09	1960.7	2151.11	4172.21	4221.2	4121.09	4141.85	3212.73	3189.17	3822.15	3127.12	3435.14	3163.18	2339.48	2496.34	2741.43	2752.7	1248.28	3159.15	2083.83	2702.63	3675.12	2459.65	2541.27	3140.61	3490.2	2698.41	2186.74	2752.8	2198.15	2580.81	3393.11	3210.63	2561.36	2010.79
P06681	727.656	712.874	952.506	822.859	938.5	949.905	743.221	729.855	865.53	886.05	830.837	755.133	816.221	819.172	856.135	917.695	855.919	903.827	867.708	717.186	668.364	861.809	811	698.463	620.735	694.388	688.48	698.589	562.735	640.13	769.789	662.6	690.525	909.154	759.946	634.106	591.689	546.673	873.714
P06727	11021.7	8506.84	10036.6	13989.6	4722.79	25085	18231.4	9021.37	12671.2	14039.2	10769.1	5981.72	5736.47	11236.5	9129.39	13994.7	6175.52	8635.85	8751.07	10069.7	10930.8	8076.12	10413.4	4643.13	13274.8	16270.4	9396.61	11712.4	4756.02	11679.7	11139.4	7292.95	10545.6	11144.1	5409.48	9026.18	19346	21213.4	7394.5
P06733	22.3207	149.327	10.8784	6.04971	14.505	20.2423	43.135	9.09758	11.462	20.8468	13.0428	31.7886	6.59271	40.5912	6.56866	25.6886	12.8658	8.19628	15.4551	165.274	20.503	19.7539	8.13565	88.3961	17.2161	102.428	11.2346	15.3794	330.956	13.7162	4.18522	29.9258	10.9764	19.4648	60.3365	11.8811	10.436	47.3077	11.9307
P06753	4.70612	4.48206	15.0675	7.72748	22.8272		10.2314				8.47267		3.87403	34.9162				19.8553		27.5098		7.88779					6.24442	14.4197	26.846							4.8077		10.8549
P06899	66.0187	220.146	75.5538	36.5039	88.269	108.265	93.8744	44.9234	60.2806	90.5297	59.0191	53.0074	34.5516	74.3513	50.041	78.0494	70.31	60.4931	93.3332	178.196	61.715	76.7043	51.0285	124.322	54.7746	119.763	55.7379	53.3841	3660.41	54.5772	52.8139	55.3051	53.2231	73.0575	85.058	74.9998	53.7151	252.303	53.1328
P07195	33.3463	33.6595	18.7668	29.2748	26.1939	39.4994	26.8618	42.9863	31.8571	31.2099	32.347	25.3368	27.1585	40.4652	27.6305	37.8889	23.0345	25.3459	35.0929	35.2433	35.3504	102.527	30.986	29.9619	33.9171	44.4068	42.9849	24.2727		30.4101	38.6904	28.5032	29.5196	30.501	33.8656	41.2612	39.759	68.8018	32.0776
P07225	517.934	552.496	812.607	736.018	418.058	588.875	576.961	642.504	628.615	588.347	639.103	511.325	589.446	539.057	620.128	581.974	613.971	713.755	701.382	663.871	561.797	389.922	721.832	558.662	511.782	523.627	558.359	548.185	275.23	612.541	450.8	545.237	621.972	639.602	550.832	477.875	583.144	429.942	742.584
P07237	8.78323	10.4812	5.13651			15.1132	7.00168		2.91677		5.4821	7.12335	5.12416	7.93149	8.00608	17.2004	4.32785			7.80589			5.61329	4.16228	1.29999	8.94434	6.1414					4.35722			3.33372		5.22507	13.328	7.77622
P07339	15.4199	15.1249		13.763	13.4922			6.04182	11.1686	27.1218			8.53216				8.58679	11.0767		51.5625		25.8542			22.8827		8.81875						8.28269	35.4709	20.2236	24.1257		20.8393
P07357	488.299	581.517	846.35	718.72	573.751	659.451	728.445	769.715	686.263	616.28	731.393	617.544	599.861	617.22	725.832	604.606	791.785	861.16	657.119	648.566	365.139	448.312	706.985	654.007	631.226	710.422	479.474	531.212	440.085	571.91	466.102	475.714	547.804	661.822	652.46	416.3	492.01	551.258	524.507
P07358	611.713	859.399	1157.61	995.936	672.578	906.735	925.245	928.739	961.774	852.302	1039.97	710.683	792.682	832.725	920.398	884.054	1046.92	1125.24	974.665	872.075	548.226	621.081	937.416	875.93	821.81	1132.7	643.631	715.402	458.148	815.809	692.884	636.132	707.665	905.026	866.301	571.708	719.409	722.673	786.833
P07359	116.649	92.0006	170.16	113.979	120.627	49.6681	182.463	86.6124	93.1505	177.835	100.543	105.844	108.18	125.215	111.58	117.038	116.474	122.051	160.103	103.62	71.5752	276.398	105.498	101.741	83.7159	64.0111	143.756	131.969		88.0993	82.0918	70.5881	57.6861	90.1778	60.8105	83.5198	82.4092	117.926	73.2096
P07360	563.669	613.71	934.009	796.039	636.34	835.989	599.648	657.119	740.667	719.673	681.532	484.02	502.297	635.718	602.304	634.797	604.737	786.501	774.102	635.886	230.953	513.823	698.307	733.967	740.662	839.985	503.848	593.98	292.32	641.97	527.426	608.559	605.354	714.536	788.771	419.53	597.368	613.095	723.059
P07737	17.0416	42.303	24.1226	32.5605	26.0554	30.0057	46.6664	16.4034	10.9002	9.7753	28.5618	7.78344	6.62696	26.0369	12.3147	13.0068	24.5715	20.7508	14.2912	36.0163	16.99	30.2573	8.72191	12.5379	15.7785	24.9512	31.0133	28.0124				8.48025	5.57659	5.87353	5.7565		9.11872	24.2134	14.0239
P07996	364.566	462.26	610.197	499.125	590.208	90.0608	549.518	256.797	345.485	638.393	465.946	400.077	433.617	603.513	451.739	376.374	608.754	643.888	520.318	402.664	404.331	361.962	454.95	213.194	272.749	263.906	585.479	443.753	683.236	304.482	171.299	336.73	376.428	430.748	361.016	242.101	371.121	441.278	464.643
P08185	1549.94	1612.56	1846.49	1559.45	1426.81	1338.75	1015.98	1441.97	1661.72	1398.1	1437.54	1503.82	1575.19	1924.65	1436.44	1726.73	1815.6	1497.2	1602.9	1370.67	1838.29	1113.93	1564.51	1159.88	1257.13	1638.04	1316.1	1354.64	1169.95	1325.14	1814.08	1397.29	1503.96	1665.37	1274.34	1151.43	1541.07	1551.29	1369.46
P08195	6.20655	5.97339	3.60672	10.1544	6.37161			5.37945		30.5755	2.94418		3.92464	4.57211	5.62948	10.4398	4.24792	1.94124	14.8011	5.65402	7.25963	8.21113	6.30274	4.60913	4.78285	12.0136	6.71216	4.20511		7.27612	15.8181	19.1155	4.05278	7.4545	5.05408	30.0379	17.1213	10.6585
P08238	47.3268	37.4533	61.5828		18.2598	23.6551	9.4157		15.8923		18.2365	16.1334	21.3992	18.2563	15.1087	72.3603		19.5981		27.5187	14.5155	23.8706	15.2473	20.6366	12.7956	21.816		16.5272			16.7095			24.6767	21.0409			10.6243	10.5118
P08246		42.3497	20.6252		25.3339	11.4777	4.76559	9.45245		13.0336			14.7945	17.079	9.6914	13.5412	36.7643		25.967	10.0654	15.8092	13.6144	14.5608		14.6476	30.9357	2.08846	47.0469										26.4722	10.4276
P08294	30.9915	220.678	10.0952	26.7092	11.6813	15.592	13.5298	32.1523	34.0574	9.74433	28.0404	33.7743	33.6828	32.6165	27.9634	37.611	28.8892	28.0263	26.2661	15.5297	17.4908	42.6044	11.7146	30.8431	29.0657	29.5169	20.0019	31.0494		39.5778	24.5489	31.2618	50.7131	23.9359	37.7703	41.2	39.2312	54.2262	18.3626
P08514	3.46179	14.93	4.1295		5.52394		10.3309				7.95397	2.6566		17.0423	3.24953	4.31552	8.8721	5.41886				26.5125	7.07022	25.1709			5.28173								6.1896
P08519	162.198	755.152	235.869	1956.81	228.702	208.584	59.6968	879.72	221.226	5018.45	427.672	455.812	531.813	1931.93	239.717	82.0487	146.411	2576.57	480.047	106.03	231.798	264.77	190.625	823.14	542.531	312.013	1694.76	242.131	2019.52	7101	460.138	1632.35	703.33	132.517	983.775	900.558	695.669	541.359	150.914
P08571	150.074	176.2	188.856	224.646	218.096	222.045	185.989	147.35	174.709	176.07	198.592	162.579	158.802	191.105	150.176	194.795	140.6	192.7	268.34	131.403	175.078	241.022	124.552	170.078	169.043	201.708	211.208	164.663	335.952	204.549	188.435	169.004	164.819	216.573	195.272	186.956	159.352	195.18	182.182
P08603	5039.88	5929.37	7197.13	5996.01	6506.41	6142.29	4495.18	6085.39	6314.81	5879.71	6772.97	4890.12	5172.86	4749.07	5503.64	4982.87	4442.96	6041.65	5360.63	5717.75	5286.57	3369.3	5272.34	3761.82	4784.67	5759.4	4731.81	4970.38	2863.27	4705.02	3891.36	4911.3	4684.63	5033.66	4361.45	4665.77	4264.55	3249.81	5196.28
P08637	129.849	45.056	60.1472	61.2363	180.889	132.087	119.51	98.891	100.188	109.98	82.4822	116.603	72.8124	138.786	61.6593	86.1829	95.7246	44.2469	55.0674	120.608	117.028	103.756	56.4763	89.8546	136.615	119.677	126.002	95.4093		80.2127	79.2125	91.8154	78.1012	84.4361	81.6307	78.731	133.447	249.814	104.659
P08670	6.63225	66.2081	5.92929				12.9288		18.5299		7.27974	45.8439	51.8558			73.9686		24.7201		95.4351	26.1697	37.124	10.3812	72.147	11.7924	58.685	14.3541	15.9348	412.586	13.8959			9.28693	17.428	16.9939				26.2146
P08697	3239.59	3627.77	3527.05	3217.34	2714.68	4096.46	3026.17	2678.83	3378.2	3280.97	2416.4	3010.8	2846.74	2854.07	3389.38	3912.28	3446.56	2884.24	2982.67	3273.7	3942.89	3574.16	3499.03	2774.91	2936.91	3260.3	3094.54	3057.84	4101.4	3359.52	3074.56	3185.34	3186.28	4443.38	3126.46	2982.27	4018.2	3184.11	4183.85
P08709	38.2628	27.8454	30.0018	41.7485	13.4112	49.1511	44.3026	18.5024	22.9623	58.946	30.4943	18.8535	22.5874	38.1171	23.5648	59.2413	28.3798	20.7115	60.905	37.4246	30.8581	16.0149	26.7681	16.2106	36.4174	37.4686	29.6857	39.6802		36.2097	24.3136	39.5254	28.6341	35.4622	23.6342	33.0124	35.2583		40.7708
P09172	24.3858	89.2244	49.0878		52.2585			57.4258	40.699	28.1419	26.7337	20.1883	22.5808	23.398	39.9671	65.2716	50.1311	37.0522		19.0422	43.2022	18.2536	53.3509	14.2964	13.1866	30.0289	15.9961	7.9088		42.2231	31.5264		34.0141	76.9988	10.3092	24.3512		53.2461	15.176
P09486	63.5024	69.8826	85.9831	72.0688	67.6479	32.4874	92.1253	44.372	46.4629	92.0431	62.29	58.6449	65.1916	83.0411	61.1366	72.0695	67.5152	55.736	57.6596	49.2646	69.9525	31.7625	81.5999	44.7899	67.5074	55.4206	66.5644	47.3553		56.7224	32.236	47.809	61.3832	44.1671	55.2384	37.8541	65.2558	78.5682	99.5953
P09871	2387.39	2933.93	3333.68	3145.96	2668.54	3546.26	2518.51	3487.02	2832.98	3463.48	3621.52	2176.37	2246.84	2848.56	2971.03	2820.2	3218.94	3065.52	2829.78	2845.71	2537.81	2741.27	2959.2	1725.23	2738.14	2782.95	2390.84	2102.52	2824.54	2497.06	2129.73	1973.65	2405.35	2550.16	2677.32	2119.66	2573.76	1986.68	2068.66
P0C0L4	5608.31	4631.94	3344.65	7077.74	10466.8	7478.13	6901.33	4852.93	8371.64	6996.88	6392.97	11863.1	12001.8	5676.14	4362.78	11278	8523.23	10774.9	10473	7381.84	9281.05	9658.46	10431.3	11030.6	8116	4906.43	11778.7	7484.22	12327.9	11487.5	11796.9	9749.91	7837.95	13427.1	9604.04	9913.7	9632.86	7167.88	11552.2
P0C0L5	436.238	600.613	598.534	817.226	516.662	1230.65	538.9	940.639	1213.68	1140.52	996.541	835.402	929.69	896.923	528.261	811.082	787.743	1384.11	1175.26	1345.15	716.169	694.839	1714.99	668.806	901.212	1097.92	1102.66	429.408	132.991	1250.1	941.139	917.959	666.349	1014.92	1345.32	782.485	965.68	462.047	1002.02
P0CG47	49.1755	52.9381	44.3335	24.7651	32.8436	83.3838	51.2941	47.0509	112.108	65.7966	34.6922	32.0689	21.1185	68.9062	40.2616	40.0967	62.2255	20.539	113.072	303.935	33.7995	47.1826	17.1299	22.3737	69.1753	55.291	56.645	76.7258		53.9094	64.4917	48.3764	45.089	77.5134	8.86599	71.7105	46.04	84.5257	51.128
P0DJI8	76.022	16.3541	48.5575	130.79	877.246	1551.06	91.146	103.289	50.8879	74.5997	172.183	66.1506	58.9276	32.1535	30.3552	57.6432	45.7609	114.648	36.3096	28.1331	28.0353	39.7276	28.5277	1771.94	51.9219	27.5252	71.4623	52.7917	55.3133	67.6918	262.478	35.3404	115.006	39.6818	29.1938	13.9091	38.6712	154.954	89.41
P0DOY2	7577.12	7553.91	6537.48	6288.17	7382.59	8126.65	8848.87	7194.5	8562.02	9793.43	9148.29	7934.84	9296.56	8785.39	6708.62	11020.2	8655.39	7101.54	7000.96	6587.4	9639.43	8154.19	7870.12	6927.12	8596.1	5227.54	7021.5	9756.77	22393.9	11018.2	16705.8	12442.3	7981.02	6526.52	8749.89	15036.6	10089.1	16754.2	9677.43
P0DP01	27.9846	18.3006	15.7907	12.0961	16.4587	14.9743		15.7923			19.855	11.7421	16.6583		13.01	28.9525	26.1893	20.4252	17.5879	9.62498	23.016	62.5449	14.8665	18.8578			13.9457	27.4819		8.1622	45.5475		52.4077		43.8495	22.7859	15.5328		11.4776
P0DTE1	17.7314	84.1976	43.4102	33.9685	25.7185	17.3874	56.3493	51.4547	19.7132	22.7207	61.572	17.5107	34.5275	47.6896	36.2907	50.3364	19.1152	72.7073	34.1965	57.941	36.0405	9.19306	45.4571	35.0553	55.3662	23.7347	24.0001	33.8118		55.3579	70.899	66.808	30.4542	31.2343	24.9808	84.7969	29.0865	54.5573	27.0004
P10124	12.0317	8.66068	30.9863	16.7873	26.2867		31.8472		19.6194	25.227	20.5191	15.7742	17.1129	27.5653	10.6066	22.6759	17.1483	16.7888	29.0603		10.3889	14.619	30.5072	17.5424	20.3229	14.691	23.2674	17.0738	30.7084	10.6436	12.1922	12.2394	16.1957	12.3834	19.8605	20.3718	22.1575	20.6623	19.6308
P10599	16.2801	20.1573	16.5899	17.5485	16.86	34.3738	20.7881			23.3515	19.7863	9.88967	6.13457	22.409	14.6917	18.2203		11.7806		205.174	19.5932	46.4123	14.2873	14.639	4.61095	31.1647	19.3636	3.43433	6.93053		48.6445		13.9396	18.4598	11.0158		9.72494	16.3426
P10643	803.903	925.708	915.2	1359.31	740.664	1465.56	882.244	1407.45	1239.95	987.374	954.545	913.855	925.336	1452.02	895.104	685.128	1061.68	1046.52	1226.84	826.873	1052.67	1134.62	1268.68	922.114	1134.89	1182.75	1029.14	929.246	1483.95	1077.48	424.408	1059.8	870.966	1075.28	1141.87	1286.48	1346.63	1513.06	659.638
P10646		18.9766	18.427	25.5318	15.5544				11.9881		20.266			45.9239	24.6048	66.1316	15.0979		15.7036	40.466	25.1959	19.8488	21.2798		6.08108	19.7213	2.19277				38.0066		19.398	12.8529	4.80072	34.6518			6.06108
P10720	719.652	963.681	928.639	1092.24	1197.82	204.36	843.463	456.328	608.612	786.082	487.922	758.612	768.291	933.352	952.118	725.287	1127.39	946.977	905.894	486.557	783.422	569.232	1224.83	736.754	816.61	665.797	775.12	732.499	1568.97	742.876	485.482	488.803	939.637	865.435	569.874	597.919	796.382	780.238	1037.59
P10809	3.92583	32.8841	44.498			43.361	6.83832			5.67633	2.8432	6.21708		15.2008		10.9975				38.6491	9.27001	4.91272	4.35957	21.6999	5.91309	16.2328	2.27369		102.448	3.70955	3.52993	8.58105	2.54594		7.38724			11.5626
P10909	6411.37	6884.91	6749.34	6874.04	4754.92	7189.99	5835.25	7373.31	7492.38	7540.88	5555.97	5936.51	5641.02	5855.6	6501.82	6236.51	6918.43	6799.02	6367.93	4877.03	5344.18	5145	5944.42	4684.43	4382.45	6486.4	4730.32	5540.25	2853.06	5080.96	4621.07	4895.71	4689.41	6362.33	5559.1	5198.25	6075.11	3555.15	4581.33
P11021	23.2781	20.1598	16.3389	14.5812	20.6265	13.5364	16.1312	18.1223	18.2319	14.3031	17.8627	15.4147	11.706	28.5895	13.8213	16.323	14.4127	13.6261	17.7461	25.128	16.7845	16.7044	15.18	15.9605	12.5577	17.3262	14.3696	16.6884		13.3486	14.6993	18.4446	12.1685	18.6132	10.5051	16.729	18.7671	22.4766	17.1604
P11142	16.9433	50.898	12.1628	7.20341	6.3426	16.9344	23.2312	12.7456	14.3766	12.6171	14.6914	12.3095	9.29572	8.10548	7.11387	18.1107	11.2941	3.14783	14.3932	64.614	14.4915	21.8537	12.7241	21.1089	17.8829	76.3275	17.028	6.15181		14.0574			10.9928	20.3868	7.42542		11.1438	19.8527	13.8612
P11226	413.353	262.442	80.3974	109.131	651.497	271.801	77.3179	31.9876	67.3768	187.451	421.933	208.214	185.195	139.049	15.0932	31.4613	40.8514	280.327	345.128	59.2514	231.549	232.382	100.468	84.1903	111.157	735.453	268.828	187.114	123.962	240.476	101.417	132.454	56.9917	221.383	92.0243	435.891	119.773	452.96	27.3635
P11279	23.3993	10.8707	4.60876	11.5439					21.7606		20.7011				17.8388	12.0194	35.0677	32.1288		31.9243	17.1558	14.3874	22.7648			13.3772		24.7137		13.296	38.0686	41.2324			9.46374		16.4171	32.7921
P11597	41.055	48.7528	46.6317	56.1557	28.9951	51.8409	40.6416	51.9389	35.7862	56.328	70.8865	59.2195	56.2921	72.7768	53.6063	58.594	74.0437	62.1118	54.652	53.7128	41.8863	47.6454	40.3736	38.7033	42.2266	76.4102	61.3287	42.7086	25.9399	25.9324	44.169	22.6887	32.4189	31.4655	50.4396	41.0702	42.7412	60.1944	38.999
P12111	107.742	64.7861	58.4145	78.0498	56.6856	71.325	78.2685	85.2488	89.4432	96.4012	128.654	93.1217	100.797	99.6839	61.635	92.7465	80.1298	61.3699	72.0413	105.368	56.195	68.8954	80.8776	87.0621	96.2134	76.6379	71.6244	100.457		73.9786	97.3237	88.6228	74.946	66.4405	56.3913	115.198	75.1137	89.9197	59.4967
P12259	102.408	136.039	138.54	149.542	124.504	138.121	93.2874	129.574	93.009	94.5589	113.336	115.571	113.215	103.356	130.809	125.756	124.865	131.875	103.471	93.6808	110.873	90.4525	130.348	121.597	80.6365	130.296	113.928	82.009	103.821	89.9529	87.3982	87.2319	95.7139	111.815	115.941	116.889	93.3356	94.0839	95.1364
P12830	14.9372	13.0405	8.36984	15.0245	13.082	20.7586	23.6193	9.31785	18.0775		9.43231	12.2933	10.901	13.0306	10.3001	19.3725	11.3123	13.9232	10.7987	14.3018		18.2444	9.73159	10.7722	12.586	11.5634	9.34691	19.3114		10.1885	14.1978	9.75649	15.315	13.5213	10.5385	16.178	12.0554	9.04994	21.5206
P12931	26.3805	54.9935	36.506							52.561	20.9812		19.3734	2.27941	56.6603	22.6951		73.7398	26.5999	41.076		32.4189		41.2941	21.9236	26.3366	18.4183	16.1609				29.5819	16.9459	34.9022
P12955	9.7231	12.683	7.87753	16.9172	12.3655	25.4819	7.89874	10.5405	6.83099	10.6787	10.6767	12.9102	10.3082	7.72033	10.3848	8.98358	14.0409		14.9547	11.9301	11.5343	14.8872	8.92142	10.6294		12.7843	12.3103	15.1312		8.8535	7.27646	13.5107	3.29107	19.48	5.51138	6.3323	12.0222		6.68048
P13473	836.147	814.419	1139.35	1020.49	801.271	1043.34	1069.15	871.009	1576.76	1473.59	1436.18	659.089	674.405	1094.25	693.014	1516.9	1428.85	715.902	1467.58	1232.15	1926.33	804.649	1721.88	1212.93	1382.35	1031.32	999.95	1160.98		829.453	981.89	1162.85	1057.86	900.911	297.986	836.545	1616.27	1379.87	1224.56
P13591	17.636	34.9221	25.177	18.7981	22.3113	18.261	83.0022	24.8306	38.4896	17.097	25.8199	33.8021	21.492	37.8041	27.336	32.4216	37.2654	14.8564	24.9311	29.3413	19.2816	14.2634	35.605	32.0775	40.2405	34.2908	23.5694	28.2035		23.5247	32.6246	18.6128	22.9043	28.6142	14.706	30.8608	11.5508	31.7089	27.4284
P13598	11.4165	10.2019	10.6001	4.79526	6.38331	6.7913	17.0963	20.3183	9.352	56.8514	6.82131	10.1675	20.5743	14.8958	7.01345	16.209	11.5691	7.94323	25.2261	20.6872	23.91	38.6398	14.1163	13.196	9.38296	20.2199	14.8656	21.9439		60.0491	34.6728	34.7672	6.95206	10.6825	14.86	37.4717	11.6079		21.4483
P13645	251.624	35.5612	29.1166	419.148	54.4298	2637.39	47.3469	52.2008	110.488	250.847	254.939	91.1809	101.577	48.9894	610.219	223.251	108.829	61.722	53.4144	13273	90.0056	2828.29	83.3709	70.1208	72.9672	872.67	1035.24	24.8358	329.468	54.5559	65.5262	144.87	361.295	305.905	272.551	319.205	31.2551	604.874	27.3972
P13647	15.2734		10.9849	25.3524	6.5535	94.8052	13.4553	16.4109	12.7117	23.4716	13.8687	10.1285	8.69765	12.2846	38.2745	30.1153	18.0458		9.01058	3919.7	10.2479	138.225	14.8789	9.77427	2.98101	22.3253	15.8965					27.6115	21.7344	24.3	13.3794	26.363		39.7607	7.65994
P13671	753.963	858.424	933.577	960.144	538.996	1079.33	674.429	897.47	920.033	999.917	967.927	836.534	888.415	908.714	876.545	977.948	1020.67	1075.46	1069.33	768.761	913.845	803.076	798.218	1179.37	686.503	805.596	920.097	884.588	1016.08	1025.73	864.779	961.274	1018.06	1120.21	860.641	864.501	720.141	888.234	952.958
P13727	13.7162	14.1781	23.2662				14.0786		20.2917	12.2038	17.3366	1.70505	13.6426		14.1543		10.7458			12.5953	10.4157	3.58519	20.6846	7.88539	9.51451	6.58728	6.34259	13.9316			27.6455	14.6682	7.20934		5.39054	11.7456		31.0614
P13796	47.225	39.2182	30.9687	34.9727	38.6731	29.8815	44.6466	26.6635	43.4018	35.8227	46.0891	35.0317	34.518	49.3554	30.8824	54.3292	37.8703	37.6817	38.9765	34.5258	38.3594	50.3987	29.7808	31.619	38.7007	37.8932	54.5347	45.8949	65.4564	31.8446	44.6993	46.8558	24.3108	39.6748	34.3276	39.2496	40.6294	54.751	32.234
P13987	14.7796	13.9281	7.50002	6.74526	9.72238	16.5011	6.40036	10.339	8.14095	8.30829	12.4907	9.00915	2.90053	18.5168		5.30355	2.54702	2.522	10.2542	7.9992	1.96134	6.26874	4.74678	3.23752	7.68245	11.6412	2.73221	2.6746		3.78773	3.43053	6.9556	2.59729		8.34209	5.69573	17.0335		2.12255
P14151	50.3356	87.3823	72.1053	61.1535	81.295	66.583	49.4213	48.4886	58.9187	101.378	80.6267	59.4497	59.7162	102.046	64.5933	68.1479	79.9496	68.0762	65.2291	76.7137	69.7244	119.87	80.7343	75.5595	81.5524	85.2771	97.907	143.521		105.74	97.6031	104.634	70.9411	68.3738	43.5498	65.1735	109.507	113.774	52.3231
P14209		12.2796	10.8669	15.2649	14.2145	9.66687	30.0468	45.849	25.5558	11.528	23.4521	15.6838	15.6917	19.5944	7.60618	15.4517	10.9881	6.92588		14.2961	22.7916	16.0692	9.30285	4.49981	16.7422	11.7961	14.0969		39.0634	22.509	21.1309	11.6021	7.614	14.5932	11.0155	24.3001	23.8548	20.4129	17.8725
P14543	18.7622	12.5277	18.6309	12.9633	9.66397	14.3518	14.7197	27.7554	12.3747	19.3305	12.1359	17.0819	9.89409	19.9244	15.7862	15.177	17.3494	9.87551	13.2391	15.3407	20.5991	15.9243	11.4852		15.2341	11.637	8.47246	24.3027		12.7066	20.2084	18.2602		12.4602	23.9543	17.7185	9.56475
P14618	7.38284	19.9629	5.11792	4.77102	6.8923	12.494	10.5619		2.88082		5.40453	12.2709	4.44573	10.8733	11.4359	9.90762	3.62559		2.96202	38.3636	9.82418	12.5177	8.07265	18.4326	6.11719	26.5084	9.04651		32.0706	8.85875			5.94329	5.16277	9.34981	5.71082	6.17484	11.8018	11.928
P14625	32.8842	26.0347	22.866	6.98473	19.4598	20.0119	24.5486	13.418	13.4417	21.8558	13.4399	23.7742	15.4919	32.9053	15.3062	39.6164	12.8916	14.1689	19.3096	21.9372	7.54335	24.0786	21.7931	26.0689	27.1708	27.7585	4.89918	31.5041		12.2868	18.8456	17.9021	18.2939	13.4897	13.5216	24.6871	23.9639	24.893	9.4592
P15144	2.62615		3.14049	1.34715	23.6097		4.41569				4.58765	4.46942	4.50979								6.28091	8.3893	1.61903	5.56945	6.19579		4.64601	6.03063		2.51284	6.16335	3.20518	5.80324	8.93648	8.6794	7.60777	6.47126	3.63182	10.0761
P15169	541.171	528.309	845.98	582.137	585.914	530.635	511.654	727.15	611.386	689.426	600.597	635.393	575.399	546.861	638.832	674.816	507.237	756.404	646.056	692.626	689.085	401.872	606.179	613.775	533.284	649.232	659.241	593.818	977.726	655.957	583.236	571.518	629.717	824.766	630.858	434.569	396.039	667.112	579.991
P15814	30714.3	24626.4	24970.1	5736.19	20543.6	15024.5	40133.7	39835.2	28904.2	32221.9	23549.8	17797.8	20121	36116.3	21492	27772.3	24955.2	20147.4	12819.4	24878.3	24640.6	20218	33266.7	31136.7	22573.2	19156.8	26921.7	33161.8		30481	42950.1	57761.5	28002.8	16405.4	1750.38	40204.3	19149.6	28863.8	48260.4
P16070	124.345	52.234	58.74	62.3769	80.5534	44.543	105.069	103.69	82.0863	83.5736	101.689	86.4818	70.9826	101.956	58.6609	88.1839	60.7201	58.6983	72.7786	76.0018	85.0325	73.5158	85.7751	59.3528	100.323	91.0363	94.4253	99.2475	35.9434	73.0758	94.7274	64.8977	73.5669	45.0634	88.4841	86.7729	99.4882	100.685	49.0703
P17936	85.0063	108.977	86.486	120.652	43.8264	31.0566	79.0955	91.1238	93.4333	138.396	90.8457	81.4239	80.0256	105.566	106.053	98.2608	93.9428	107.436	116.779	107.819	109.534	83.1397	118.711	69.5238	63.2256	82.9491	86.3281	97.1151	70.5071	83.5408	56.4938	72.8323	93.5576	91.7827	82.1443	68.3027	51.9798	73.1175	99.082
P18065	9.22888	13.7704	19.7837	18.6898	37.6104	43.6333	12.8594	31.8733	44.4306		57.089	28.1109	16.3831	35.4315	9.83132	11.1442	24.213	18.4533	25.9729	18.8808	15.4781	54.9667	10.067	14.3457	27.9377	65.259	16.503			35.848	34.3118		15.7999		28.0255	50.706	30.3335	56.3531
P18206	3.55366	9.132	7.07207	8.06265	7.17675	7.39213	14.5424	9.8876	13.8523	5.56463	10.6276	4.98287		8.29629	6.72823	8.38164	7.47696	7.00309	7.74726	14.6771	7.3308	36.4939	4.54465	9.20212	5.22996	9.83329	8.87309			2.83647		17.2599		12.7184	2.48247	9.28214			3.00889
P18428	125.711	159.303	251.02	219.62	476.295	496.975	252.921	153.889	265.718	334.329	173.944	176.771	178.189	138.453	222.614	220.715	156.725	270.636	276.834	108.71	112.673	173.871	146.124	294.678	256.956	90.4618	194.491	159.285		170.004	193.488	149.624	148.977	319.306	291.715	368.462	199.615	236.528	181.783
P19012	153.01	165.976	225.734	146.718	94.3764	147.121	164.318	163.686	139.478	106.753	169.221	115.802	113.213	153.25	139.915	167.459	149.703	110.433	130.047	196.642	64.0621	78.6754	145.229	109.618	122.365	191.754	146.157	163.704	186.512	158.395	105.426	136.009	127.4	137.831	151.541	104.155	155.382	178.151	238.554
P19021	30.6053	277.816	226.653	318.962	60.2654	176.651	17.0119	62.9774	305.588	387.604	276.986	128.843	54.0842	146.054	121.614	356.522	290.518	164.487	182.722	248.97	30.9413	40.0101	249.216		14.3991	1219.12	17.2739			37.2057	30.4502	33.9127		16.2418		46.9446		31.2515
P19320	58.2372	41.2122	24.0074	36.8211	42.3646	43.6639	43.2599	40.4498	73.3055	31.2557	75.9576	43.8524	41.1447	53.5988	30.4301	51.2393	27.3876	38.4959	46.4927	57.144	33.7956	84.1211	37.1088	31.3328	51.1204	63.6919	46.588	52.5514		35.0299	38.6701	49.1517	38.2513	26.7445	52.7249	50.3106	45.265	62.8506	25.7295
P19652	23435.3	19091.4	27441	19898.8	22683.1	21564.8	19434	20728	21610	13109.8	19292.2	21396.5	22526.4	17834.8	22125.7	14775.8	26801.6	26529.1	26042.7	23116.9	25088.4	23384.1	23041	28312.6	21475.4	7472.12	21310.7	23480.2	1841.56	20875.4	22128.9	21139.7	21252.7	24049.2	18531.5	17456.3	18590.3	15870.3	24588.3
P19823	10671.8	12614.7	11914.5	11704.6	6500.65	11652.6	9564.3	13724.5	12018.7	13410.7	13089.7	12380.4	11943.5	11833.9	12839.9	13460.1	13749.8	11119.6	12969.6	12155.8	11320.1	8778.55	13185.4	9744.08	8101.01	14201	10877.1	11433.1	10054.8	11521.7	10065.3	13237.3	11070.1	15122.4	8775.04	10430.6	10915	8867.84	13102.8
P19827	5021.18	8344.44	8882.73	8458.59	3535.75	5065.91	5719.85	8575.38	6541.52	6869.71	10012.8	6895.83	7977.4	6612.63	8127.9	6830.31	8783.9	7322.79	6419.25	9104.56	6571.39	3728.76	9142.15	5535.55	4738.11	7142.32	6015.22	6534.56	4731.11	5992.93	4685.42	6548.31	6498.75	6870.51	3577.16	5042.6	5375.66	2714.56	6840.47
P20042				1.37218			2.11433				2.42861		4.4049	22.2407		44.113					2.15029		1.55104	2.84027	3.49621			0.987109		1.87932	69.2849	2.60742	2.69136						3.06909
P20701	86.9818	124.048	116.449	78.2787	145.872	187.687	86.8504	100.102	108.502	158.347	56.5164	94.5372	116.288	116.605	99.407	131.992	161.852	132.447	134.146	81.7888	55.6929	62.9699	116.713	109.303	78.6082	163.258	106.02	66.018	192.962		108.545	82.4268	64.4659	28.8638	115.863	60.4834	52.8997	73.9761	57.4944
P20718	63.2627		75.1003	37.8303	48.0712	90.0039	43.2471	54.0682	48.5839			65.1158	38.9075	39.9823	53.9911	16.0598	97.1491	112.537				74.4002		127.61			60.0302			37.4404	42.7615				40.1166		29.1899		47.2075
P20742	51.3751	28.7517	70.0928	58.8756	54.162	74.5956	92.4926	156.922	52.1733	67.8247	174.267	252.486	272.193	63.8106	115.768	299.805	782.312	460.481	99.0182	172.284	263.166	254.563	33.8739	148.797	196.133	33.8879	436.086	671.271	392.529	426.903	176.06	609.44	348.208	902.537	187.791	89.6902	75.029	71.3308	59.7212
P20851	568.315	569.616	747.934	650.06	405.23	594.591	447.589	586.576	449.353	601.663	633.74	585.768	516.451	558.388	617.77	510.376	548.634	758.829	709.744	689.068	581.699	450.391	618.366	554.328	515.922	389.376	603.768	592.064	239.677	897.381	450.45	439.073	660.975	752.225	713.975	408.236	554.433	528.424	822.081
P21333	13.0644	8.92909	12.5624	12.2245	12.8942		15.1829	6.02717			13.9023			12.7271	7.30366	14.8773	9.10758	16.5528	8.99496	11.7949		10.5596	6.26664	11.0152		7.0889	10.0255	30.805			39.0892	4.39259			14.9673
P22105	18.4091	8.81121	15.1072	14.1056	10.6043	3.867	23.3393	10.4495	15.4601	6.33337	31.1717	11.4568	9.59982	17.9355	19.3915	19.6021	19.2915	7.6184	13.2594	11.1015	10.4858	11.862	13.7271	9.40808	4.76074	14.3389	13.4387	18.311		7.58728	11.895	6.37038	23.1612	7.91056	7.36559	25.7434	10.7104	13.6364	14.1164
P22352	475.166	558.606	522.449	627.059	453.762	1244.33	298.995	761.346	658.983	799.429	388.354	372.759	418.965	660.199	426.845	495.519	511.273	439.096	531.63	320.694	432.766	376.724	568.292	357.582	376.582	467.111	446.784	390.413		560.644	513.3	436.299	324.96	607.756	742.219	596.546	704.914	1300.65	465.173
P22692	7.5303	11.3737	9.44274	14.6341	6.38526	7.83313	32.895	8.49375	19.5136	12.1993	16.6973		5.6111	6.00091	12.2616	10.081	3.90048	11.6087	15.6391	6.32101	10.5691	13.7623	9.27112	11.9536	8.91045	16.0126		16.5908		15.9684	16.2373	3.5555	14.8208	13.5682	4.4262	12.106	14.0578	10.966	11.0247
P22792	1171.36	949.947	1627.24	1079.65	1095.76	970.386	1287.94	1203.76	1182.26	1328.65	1164.01	1066.96	1104.05	979.481	1167.97	1290.57	933.241	1515.44	1420.65	1178.92	1350.19	739.728	1206.69	1055.82	988.496	1271.7	1382.68	1357.24	1261.81	1427.53	1131.57	1302.28	1374.54	1581.67	1082.42	968.707	862.981	1372.71	1329.88
P22891	37.0748	30.8402	73.9595	49.3029	25.4789	66.0291	35.0142	35.7695	20.0411	30.2767	44.57	22.0614	23.6173	42.5608	30.5812	42.6563	51.1891	39.7085	41.5971	46.0165	12.0516	19.0757	43.9323	26.3103	24.0302	57.6863	25.9212	35.0348		20.4279	33.3929	33.575	14.6066	32.5964	41.5407	11.48	41.8016	25.3324	55.6496
P23142	174.532	227.108	158.612	275.415	171.184	202.328	254.063	221.244	379.482	416.732	437.638	256.416	280.857	252.41	205.199	353.523	192.25	207.328	217.818	188.499	212.791	235.126	203.072	172.427	234.368	424.693	186.007	195.612	129.721	257.244	236.838	233.302	246.996	178.096	231.185	322.921	286.25	298.759	148.387
P23470	14.8526	11.8439	5.56706	5.76557	7.93095	9.69078		4.97194			22.3886	10.0051	7.50202	12.2939	5.32794		8.36038	9.73975	11.288		12.8588	12.851	19.4939		8.78444	18.0322	11.589			8.32332	13.353	8.70762			5.75953		7.14393
P23528	3.6001	49.1509	2.99126		11.4115		38.0412		2.08381		6.84354	19.6225		11.8304			13.3465	31.7232		74.2833	14.0671	12.6798		59.3133	2.79873	113.582			234.713						42.3586			16.014
P24592	25.8744	19.7298	16.2247	18.2054	12.9991	14.2267	33.476	26.4007	18.6514	22.7117	19.5297	7.56737	6.22176	27.1488	15.1047	17.058	7.88324	11.5651	23.5421	19.5993	6.53668	16.4003	18.1446	16.2471	33.1022	11.9133	15.736	10.8407		8.7647	10.2743	6.3531	20.0905	5.37867	11.5341	22.9818	38.6689	13.0841	12.8916
P24593	5.72676	37.81	31.1104	38.0017	11.2793	12.5987	28.9647		23.6251	35.9348	28.3032		24.9895	57.7306	40.2538	29.8128	26.6661	24.8344	48.5547	30.5202	14.9483	18.0538	18.9111	18.8399		23.7233	6.50652	33.1036		37.7131	28.5179	31.8942	22.4909	23.4432	21.3191	39.2672	26.2257	25.2601	40.8427
P24821	15.8732	8.35862	19.4438	13.7717	29.6043	27.4958			19.3729	22.3506	45.0258		17.7324	15.3613	15.0451	21.7528	14.6676	14.7453					12.1648	27.3675		10.7226	9.20207	12.5443		14.6454	14.0719				13.2297	15.3146	17.4996		8.46518
P25311	838.155	208.287	184.82	190.281	449.433	291.132	541.837	216.861	183.958	337.347	261.333	409.703	378.639	247.489	331.156	199.198	228.512	242.492	284.181	199.837	498.563	617.574	272.27	736.08	642.105	314.754	699.81	638.766	2164.03	676.501	929.845	558.829	666.038	694.618	674.771	808.077	742.849	653.502	712.055
P26447		8.1217	7.73771		18.8541									6.03642			10.6578	5.52074	18.8949	31.3098	11.5469	22.3536	7.83354	13.7338	12.6696	12.3	9.77056				9.56065	13.1747	18.8775		5.42854
P26927	73.4419	111.527	139.139	122.918	121.704	128.022	121.442	124.285	127.073	100.493	55.2012	104.556	109.077	117.144	116.131	127.039	121.183	103.131	118.584	86.2713	79.3156	97.068	120.804	118.994	116.551	115.127	121.314	130.756		99.69	122.61	104.037	98.5486	141.579	191.502	79.6673	127.53	78.1619	148.356
P27169	3452.79	2418.62	3328.49	4794.4	1992.65	3955.5	2955.72	2501.79	3559.29	4695.55	2887.48	3706.8	3611.35	4376.22	2848.68	4697.08	3282.82	3286.99	3964.57	2380.15	4192.25	2521.15	4435.83	2495.75	2538.88	4381.79	2668.98	2973.26	336.346	3156.84	4353.88	4690.24	2728.82	3681.27	2897.17	3230.65	2729.23	3044.14	3991.44
P27918	395.349	332.614	414.367	322.114	247.111	381.613	321.471	399.489	213.592	436.59	568.52	266.616	271.307	362.02	315.98	429.12	348.62	473.943	416.872	504.787	364.337	336.006	472.466	292.247	292.423	333.736	397.424	326.533	367.566	402.941	234.285	281.339	301.114	306.478	400.96	250	320.495	255.751	336.131
P29401	9.42585	43.6285	3.43568			16.2615	9.4043			5.31355	3.68401	6.95626		18.2136		7.03228				32.0491	6.21535	5.41192		14.0879	8.65362	24.3305	2.10257		29.8677	3.10368		27.9543			32.9245			6.71219
P29622	941.564	1112.48	1197.34	1293.05	774.609	1369.32	824.898	943.258	1120.17	1288.56	822.034	910.945	932.348	927.44	1251.95	1184.51	1165.95	902.01	1367.09	1108.96	1001.91	1131.46	1419.16	691.958	850.529	1173.17	1036.02	912.916	181.778	1044.72	828.242	1082.03	1116.04	1260.49	985.381	960.271	1057.12	1083.52	1291.5
P30043		6.21881	4.92441		5.5757	7.71644	11.7515		2.32142	7.96798	2.00272	7.95855	7.19509	12.544	4.61685	6.24487	6.93383	1.93823	2.12487	4.44496	17.5825	20.8715	4.80961	2.1605	3.19087	3.51787				0.864173	15.1953	8.96502	17.0604	2.31269	2.36298	8.10909	11.0413		8.52439
P30101	4.19011	23.4594	8.15849	22.4461		5.20798			2.59035	9.85043	3.22076	5.35055		13.1259						16.8941		11.125		14.5607		13.8716		7.49978	111.289	10.571					17.6147	19.1612			7.9499
P31946	34.6557	202.173	98.1233	31.6231	62.5369	120.717	66.4127	33.3577		99.1528	89.6575	60.339		358.373	11.6978	76.8328	55.3624	33.0482		231.251	86.8644	171.356	49.7571	106.783	37.8478	81.9256	26.2655	36.4442				110.471	27.6991		40.5839		91.821	46.5869	105.852
P32119	18.2083	58.7179	18.8657	31.9236	39.9897	91.0776	33.4011	22.9304	22.9023	37.6462	17.9227	27.1167	31.3626	68.2555	24.0801	58.3342	24.103	18.8641	30.3597	60.5159	49.3752	158.181	48.0956	19.5941	65.3273	31.4504	20.1914	10.5612		24.1106	52.0639	40.181	103.605	66.8498	48.0586	33.1138	75.782	39.429	48.7492
P33151	64.9826	124.298	46.6409	51.6319	65.0127	53.9546	67.0039	76.2085	121.935	65.5222	183.842	47.0533	48.2121	90.971	66.3301	59.3131	74.6592	70.7125	72.3089	92.4113	65.6691	56.8439	54.1581	65.6837	74.0167	169.786	48.2643	87.4613	152.985	92.405	63.6105	61.4095	60.5455	58.5395	70.2728	67.1129	58.0935	59.0259	42.6584
P33908	37.889	23.8959	44.1715	26.5705	41.367	58.3333	42.7107	22.9187	26.2454	44.617	49.456	40.1757	37.0351	62.6567	33.1357	41.3079	29.5021	46.3309	49.3429	57.1027	30.3184	40.1411	43.9667	42.4663	41.3301	43.2847	25.3609	38.9623		45.8561	37.1723	47.7052	32.5316	33.692	32.1469	42.3347	30.7395	24.9036	45.269
P34096	13.7053	13.8684	18.6889	21.048	22.4664	11.5706	27.8743	28.0457	15.4319	20.7266	11.592	14.6488	18.4811	10.7149	16.2957	21.1656	2.08153	11.3919	19.1434	11.1688	22.5485	14.2209	7.23976	7.84648	21.0992	13.1672	26.8108		25.321	13.6864			11.4464		22.8768		28.0348	17.2557	13.308
P35443	34.3485	38.9968	18.8062	30.7188	20.1806	15.8648	35.1222	36.7071	61.634	31.4253	136.853	34.0798	32.6204	36.0598	36.078	45.2436	27.9942	22.7693	12.8411	50.9746	33.242	19.3004	32.5058	17.082	30.2238	75.8512	41.1368	35.2054		38.3934	34.6707	42.4815	31.1616	39.7283	55.4601	46.9606	34.2825	11.6245	29.4503
P35527	216.206	33.5885	51.8722	284.873	46.2573	397.799	29.9434	125.044	83.7807	118.794	65.0864	41.1619	39.7936	71.2072	296.217	218.263	118.809	30.6822	39.2296	9073.24	150.414	124.097	96.945	52.7939	48.4247	36.884	91.9184	27.0177	2.3163	23.1093	44.9893	271.548	116.587	90.87	445.692	134.325	16.8924	121.232	25.1726
P35542	4599.4	4406.66	5393.12	5461.06	4504.77	5333.22	2952.03	8536.31	5296.86	6559.78	4497.89	4070.02	4420.13	6124.84	5697.82	3469.03	8424.3	5502.16	5038.27	3490.87	5136	3702.99	5615.78	6731.09	4102.54	3468.23	3782.48	3896.52	1317.73	4895.37	4295.94	3981.55	5418.36	5454.72	5226.05	4222.63	4482.21	4712.17	7278.14
P35579		5.7295			2.27968				6.49616	3.9546	0.358375			2.86056	6.15973	13.0274	1.05647			5.75763		4.88259	4.49505	7.00939	5.53327	1.73859	3.84847	8.47477				4.57846	4.18989	4.35681	1.51053			1.62316
P35858	611.856	586.214	612.121	696.126	317.237	111.596	574.798	557.093	471.574	718.326	376.553	526.378	557.714	512.249	741.428	683.402	459.774	660.974	801.48	405.482	695.143	601.22	653.655	473.631	248.522	515.631	572.509	789.088		651.759	495.84	635.163	684.889	742.139	861.606	565.613	377.477	573.306	847.198
P35908	89.434	28.3633	14.7087	107.056	20.1611	1450.53	21.1715	20.5905	48.2169	99.5469	151.47	49.7845	41.4591	20.4689	245.894	75.6269	31.848	20.3735	19.0566	705.161	16.5038	653.866	29.1421	31.4885	30.0003	276.814	410.903	14.9928	95.4515	21.5778	21.2451	51.6423	152.724	103.383	52.5947	102.289	16.3891	93.9978	12.2984
P36955	1596.73	1553.98	1112.65	1475.37	1299.77	1412.53	1513.89	1433.44	1192.09	1771.16	1322.71	1032.4	939.353	1303.86	1290.65	1220.88	1143.81	1000.47	1360.91	1356.1	1068.81	1512.26	1384.27	1210.31	1755.4	1510.46	1166.62	1423.43	965.505	1279.02	1480.72	891.727	1397.35	1266.82	1030.32	1201.51	1518.79	870.029	1796.74
P36980	88.0435	36.0737	79.7421	217.565	295.59	69.2812	227.672	189.679	36.5745	40.8685	329.212	176.583	205.695	176.624	197.797	59.4413	171.706	68.7243	65.7027	148.073	305.889	90.571	80.9404	113.962	107.272	66.8716	113.079	178.808	117.926	87.4577	198.446	32.6657	109.033	212.28	191.53	79.9576	91.4878	128.572	176.478
P37802	109.563	14.414	28.8732	38.9897	24.5343	8.59544	15.8598	31.2605		12.831	23.2341			22.4122	4.00789	8.42593	19.1099	34.9248	31.8904	14.6287		19.2323			1971.13	65.5941	27.6527	22.6083				11.2131	15.0036	29.1425	14.9685
P37837		11.2402	18.0925	8.10894	14.3434	10.2594	16.2175	20.1607	14.3963	16.5045	3.06055	32.7578	19.6394	16.6459	8.79898	7.53737	23.8683	14.35	9.58916	20.1584	10.6172	2.51223	23.1485	15.2113	14.4019	10.3318	15.6339	7.37177		18.3425	8.59447	10.4537	9.68703	10.5234	10.092	16.0852	9.45864	12.1035	10.5255
P37840	24.1908	4.70189			14.6619	3.95732	31.1351			25.4157			9.65082	1.45741		1.56486		20.1		11.956			8.76035	14.6338	37.9621	12.7616		51.1307					11.1688		4.70569
P39060		7.7933	9.32478	4.44516	10.5515	12.1645	17.9496	19.58	14.676	11.5543	17.5684	17.4431	11.7017	4.54541	8.65166	15.5392	15.2143	11.6175	11.8128	10.5796	8.64892	3.71517	8.40639	11.9577	8.5794	9.85099	7.27417	12.6609		14.7159	23.1161	28.4986	15.6713	9.63556	10.089	16.8049			10.1331
P40197	28.7362	27.8787	27.8504	36.2729	20.2638	4.54282	35.4595	18.2779	21.1023	21.2047	25.5144	37.6522	31.5126	39.7097	27.8078	25.0289	34.8508	28.347	34.0553	23.642	19.4443	21.3489	34.2507	23.0831	29.902	20.4685	36.6553	27.8392	78.3625	25.3147	30.2395	22.0744	33.4708	26.3479	25.5139	22.9059	32.7313	32.4884	44.28
P41222	48.1909	36.3767	39.9409	35.7204	19.8459	13.8596	38.6471	40.5598	39.9694	27.0108	71.9728	24.5876	26.598	20.5845	23.0427	27.1022	29.4941	29.3735	48.7051	38.3331	20.2213	22.8054	18.9055	24.9454	94.8412	37.1581	39.3663	48.9841		36.1263	47.6539	20.195	32.491	22.9396	24.1025	54.8822	42.7251		21.6081
P43251	182.585	203.491	196.75	278.359	151.973	153.478	127.954	202.614	163.835	190.344	60.6799	161.523	159.282	189.962	180.258	219.857	215.344	163.998	194.56	181.232	196.087	135.455	225.008	151.545	158.034	164.225	171.515	194.684	256.939	121.677	191.824	160.779	193.14	223.274	172.974	139.618	174.92	205.765	275.192
P43652	2757.17	4031.9	2832.58	3020.79	2390.26	3187.32	2592.91	2738.5	2637.5	4235.37	1826.02	1991.06	1970.83	2551.09	2927.57	2855.29	2953.66	3219.4	3072.09	3048.38	1360.32	2424.61	3269.84	1729.07	2982.86	3098.42	2330.57	2778.23	3178.54	2689.67	2022.68	3231.93	2961.43	4488.7	2000.99	2232.26	3400.83	3044.84	3269.13
P48740	579.92	644.183	603.617	735.309	653.658	645.316	646.979	567.778	460.791	543.367	676.029	542.448	573.122	625.964	533.802	680.711	437.043	295.216	669.344	421.288	604.556	729.87	667.071	692.129	679.995	746.879	638.588	576.777	656.087	545.217	602.293	450.692	570.652	562.119	485.294	581.029	611.108	571.869	757.958
P49747	52.6029	114.069	58.3514	108.799	63.6527	42.371	93.5633	114.535	118.111	81.41	225.388	109.611	117.147	107.376	102.955	138.988	78.5644	78.5643	80.1455	89.9082	89.6381	83.6374	80.3976	94.2341	90.3109	90.2402	97.372	87.9412	62.8965	86.1978	65.5669	78.6855	70.2886	63.9749	102.732	93.7373	101.486	98.0183	70.6484
P49757	237.055	105.234	57.0645	92.9653	58.4311	207.335	192.543	111.509	153.383	34.1756	141.746	147.253	132.092	213.869	62.7956	118.667	83.69	78.4096	128.965	168.096	165.962	338.998	70.6253	176.483	407.418	53.1796	119.737	182.079	279.844	265.296	151.266	330.596	94.842	84.2489	171.447	175.513	100.717	352.793	88.7863
P49908	515.347	575.143	453.769	555.936	300.666	549.489	432.012	624.865	428.015	417.232	440.391	297.462	323.817	579.926	404.579	407.759	429.205	486.753	421.845	257.282	322.31	309.377	467.184	312.476	341.905	603.92	382.152	322.541		417.321	410.36	251.072	346.274	416.626	460.078	323.001	608.155	320.677	505.805
P49913	130.768	26.9426	74.7676	53.6771	81.2752	43.4761	106.691	44.5981	34.2315	59.4516	41.3936	21.4391	21.0546	54.54	66.6869	37.0411	37.1047	52.0003	75.819	78.9835	62.2522	64.2385	52.5076	75.9859	123.099	62.698	53.4884	86.7076		64.1686	72.6902	46.7385	76.6551	52.5186	87.6454	38.0801	138.643	23.5042	110.352
P51149	390.032	150.415	215.867		439.131	286.308	527.19	171.459	208.706			258.621	260.495	101.439	167.742	267.509	182.939	214.947	364.999			407.181		508.292	182.321	274.141	416.05	391.19		257.662	529.414	369.476	421.403	251.288	219.814	311.33	408.187		589.848
P51884	729.583	867.608	596.956	743.443	458.358	492.299	759.047	799.842	1002.68	878.658	1640.96	687.714	709.312	841.397	659.775	784.804	664.882	690.006	743.454	769.015	728.526	689.069	759.212	368.446	707.59	1168.27	617.492	570.723	545.252	711.817	771.436	518.63	772.07	692.674	499.931	850.207	770.611	573.89	453.584
P53367	477.32	232.835	277.163	204.232	232.732	285.018	434.809	126.076	235.179	238.714	107.564	323.45	192.75	140.811	239.095	136.513	187.151	221.442	109.063	238.294	303.043	245.429	169.841	298.961	316.552	151.021	324.407	466.667	107.123	396.393	376.809	457.858	274.282	326.389	240.056	411.313	390.501	272.354	512.526
P54108	64.3834	24.052	17.6008	25.9598	65.4284	16.2277	56.672	40.1822	64.4896	36.0355	20.4154	42.0671	65.9791	44.6476	20.3534	25.5032	24.1913	23.6434	31.512	29.3109	70.7427	62.1461	50.6127	63.4907	105.537	66.9813	81.4985	123.059	56.062	64.8634	48.9056	62.1451	68.2764	63.6477	97.7331	58.495	107.668	125.794	50.4156
P55056	1096.24	694.84	851.828	405.873	231.639	342.009	1148.76	413.362	156.654	519.543	405.406	371.875	407.693	607.88	1246.17	235.12	803.117	614.519	1191.72	825.063	793.655	649.795	1028.21	817.51	708.126	396.734	440.11	582.996	341.072	313.767	274.59	702.456	1346.67	326.907	427.588	159.303	778.801	334.285	1399.85
P55058	348.746	432.87	414.836	302.259	420.063	406.184	331.421	533.806	434.186	392.152	452.764	362.991	402.685	477.236	327.929	424.031	384.672	340.527	335.237	356.328	481.954	459.348	491.179	282.773	316.667	554.36	379.468	344.574	512.581	395.24	476.455	355.995	384.093	308.102	441.741	447.764	324.112	556.797	332.485
P55103	16.8697	30.9997	24.6372	21.2926		25.424	31.2233	12.3972	17.6533	25.9415	20.534	7.0761	10.3992	32.1817	14.3477	47.4752	16.6516	21.0073	15.15	23.6703	11.9811	11.5987	20.802	17.7757	22.0926	24.4609	24.3925	34.3687		21.4749	14.2321		32.697	31.703	36.7642	23.8731	18.1387	11.2187	29.7576
P55290	27.0192	23.0401	19.3061	23.902	14.2506	12.9789	15.0324	20.2435	20.8041	32.1781	31.7174	20.2852	20.2365	40.977	21.7198	33.6787	19.7495	13.5185	51.7752	34.7579	27.4694	17.3983	33.5463	21.9289	15.4409	45.4914	21.4011	27.2214	16.6439	29.4991	21.7346	36.1786	23.8198	9.75988	39.7496	32.9702	23.0647	45.0493	20.6677
P58335	23.5944	27.2042		20.6882			12.9511	27.2288	19.5928		28.3398		26.3613	61.0466	14.8949	5.13757		17.3881	14.885	8.61317	4.80031	7.06494	33.1716	11.7691	6.39848	6.3509				21.3654	25.6242		4.82477	8.4486	40.0837		10.6856
P59665	130.817	82.687	22.7638	24.4742	392.963	26.3807	262.73	25.9356	31.6913	8.66789	21.8167	45.1226	38.1103	29.8501	19.8758	10.9661	10.4411	8.07015	18.3184	16.7497	111.87	881.68	15.637	99.8037	165.816		157.113	342.5	106.775	111.943	102.886	114.244	94.4452	155.847	102.761	57.577	160.971	511.047	199.515
P60709	244.142	510.684	366.119	222.553	363.583	216.959	311.057	222.439	201.619	238.06	464.659	190.63	170.59	443.319	145.018	267.492	294.258	239.485	213.055	376.165	171.456	604.279	206.391	167.415	191.396	226.59	305.137	259.124	685.259	202.148	118.203	163.303	159.635	143.556	264.614	220.534	208.625	426.759	192.945
P61224	4.79702	5.38294	8.52485	9.02677	6.47719			7.60104	8.39943		3.58786			12.2343		8.7618		6.44877		5.41458		10.0714															137.832	8.6313
P61626	75.0127	72.2592	68.019	90.9711	87.7728	75.5121	126.015	70.3166	72.3859	77.1036	71.606	59.9685	70.5375	86.3087	53.9387	69.8263	37.7649	35.4411	101.656	78.7775	41.5088	95.5087	77.1181	41.1196	164.944	47.7001	53.2775	76.4681	119.848	57.2337	52.3732	31.5148	82.7327	43.6242	64.5493	76.593	111.972	64.6455	41.5683
P61769	117.313	115.765	106.656	85.4898	119.041	96.423	354.681	127.439	125.939	85.3783	167.633	95.3232	113.195	148.904	87.6076	144.143	88.254	64.7411	136.03	142.478	59.3437	175.202	103.75	71.6794	183.013	114.198	124.808	98.8828	74.3285	98.4795	212.106	85.6979	115.278	67.7622	144.82	155.541	141.905	90.3082	62.4566
P62328	40.0986	51.7633	278.103	195.762	52.9631		71.8325	78.1198	38.5463	71.3954	161.472	24.8272	29.1623	203.787	60.2026	49.311	70.6167	212.341	46.4583	29.7147	5.08651	47.9575	26.7867	16.6892	34.3123	16.6056	121.388	117.72	312.127	14.8208		12.9187	17.1203	18.8435	91.7318	16.9919	18.8401	76.7357
P62736	2.13572	23.4665	6.1374	22.6411	1.53478	7.40933	5.40384	22.9823	15.2241	11.0078	10.8468	11.1982	13.0784	24.6918	15.3295	14.1779	9.36463	12.0097		24.6422	4.85331	4.34599	5.9017	5.45319	3.45298	16.9015	2.74502	2.41071	112.984	4.56578		3.36786	3.87351		5.75751	19.9397	2.90517	14.9207	1.18481
P62805	28.1802	70.6322	30.0769	18.1646	24.9946	24.6187	45.225	17.9685	14.4282	17.5236	13.1624	18.4465	16.7519	30.7873	12.883	29.1963	20.8455	14.3794	21.3701	43.2455	21.3155	22.9591	14.7718	22.2985	25.0066	45.5662	12.368	39.6519	810.209	19.137	17.6002	20.6482	9.66828	15.1825	35.5803	27.7305	20.3617	93.1685	11.9904
P62913	52122.1	27785.9	35535.5	29811.6	18326.3	29758.6	49616.7	55769.2	17186.7	51486.3	34899.8	23345.4	12575	52824.7	31721	46556	63529.6	32354.3	47160.4	26937.9	40483.6	32911.2	15759.4	25271.2	28385.2	70399	47923.6	39125.2	20206		36044.6	43608.7	20287.7	27524.1	1096.13	43498.9	59412.3	53815.8	54561.2
P62937		51.1	38.1018		16.9813	18.9108	20.5369			21.223	28.1472			16.1097		10.4713	14.3383	12.1891		35.2073		14.268		27.2475	14.0869	9.92674	9.97872	8.05112							6.21307				21.5451
P63104		4.74957	5.92672		7.35467		3.56882	6.08664			6.35418			5.67495	4.84904	7.48786	6.53096	4.76706		8.71286		12.3975				1.8149									2.48481	3.63639		5.72197
P63313	67.6443	100.176	734.964	437.594	280.708	28.8656	329.376	128.207	44.8898	142.818	525.107		43.4301	3.77062	41.1441	147.184	114.019	407.827	124.485	29.8678		140.067	47.5142			15.9197	484.855	404.666	632.453	21.9129					188.013	54.0816		272.36
P68104	9.69871	12.0454	39.7896	15.8658	8.14493	12.3969	8.71861		9.5192	5.82587	4.11598	3.12049		11.856	10.3821	1.90174	7.32565			20.2251	8.9538	2.86421		9.6245	9.1515	10.5413	2.35417	4.28453	12.3054			3.49124		5.83795	9.36433			20.2178
P68363	3.14324	21.956	7.5574	8.40621	4.8647	7.54708	8.30548	9.50943	9.56548	9.60287	7.24858	5.34588		8.25426	7.25532	10.9264	8.95784	7.8728	2.49869	29.2139	8.594	9.33666	5.49474	11.37	6.52915	14.1978	7.27232		205.638	12.6642		13.1444	2.24716	8.13802	8.2473	11.9882	13.4747	0.180073
P68371	5.25626	22.4491	6.30211	7.62519			1.60427	1.48013	2.53838	3.70561	2.32074			9.27465	3.04886	5.34698	2.63186	4.28878		9.59982	8.07335	3.45711	3.13941	6.74336		5.61841									4.90057			10.6799
P68431		2.73439	3.51649	1.18415	6.70286		3.79097	12.063				10.327		1.70686			3.64294		3.12881	4.4665				5.18104	9.00159		9.35496		70.7326		1.82528			6.04911				17.1116	5.1182
P68871	2683.37	7032.76	3076.29	1817.43	5129.14	13679.1	5695.23	2865.33	3720.7	9178.33	2497.13	6057.2	5098.01	8235.69	3262.31	6156.74	4466.97	2702.7	4378.01	5331.54	8189.64	19278.8	7489.31	3271.36	7807.41	4967.03	2612.46	2171.67	1066.84	3172.17	10775.5	6121.39	16735.7	9678.35	4171.56	6527.23	13005.3	4266.97	8035.77
P69891	1390.72	745.995	915.29	80.974	816.729	2229.54	1991.45	761.032	801.331	2243.22	676.066	493.723	765.976	1936.6	595.972	2848.42	733.951	303.491	1055.18	1134.54	2033.67	7289.5	855.862	702.397	911.289	3504.11	1139.92	1014.65	359.7	931.632	4884.34	2625.54	3728.67	2081.93	1002.87	3752.68	5298.12	3659.92	3463.74
P69905	1336.92	4998.88	1930.65	1005.36	2674.73	6783.95	3673.17	1826.68	2162	4850.38	1684.91	3266.69	3666.92	5409.78	1993.49	4053.5	2368.92	1511.5	2470.31	3900.74	4672.28	11188.7	5456.33	1798.01	5041.25	3069.53	1425.72	1103.29	752.99	1811.96	5724.69	3067.48	10770.1	4911.72	3097.14	3612.56	8181.93	2665.89	4285.67
P78509		113.606	114.683	122.85	91.0616	134.509	172.453	114.403	84.6468	240.6	133.32	108.749	91.7778	133.534	195.838	145.743	163.157		185.474	69.7234	157.764	122.324	154.842	96.0945		78.3996	295.352	230.482		154.478	133.634	190.979		227.862	91.1251	181.502		158.757	151.297
P80108	251.534	249.516	336.324	390.259	213.236	340.697	209.244	242.642	263.733	249.641	224.279	158.294	178.031	179.519	254.711	151.854	157.679	235.609	207.388	204.39	188.053	158.443	274.605	158.198	248.316	454.379	187.657	175.717	115.721	181.253	254.289	207.368	182.681	236.129	92.9352	150.774	269.762	154.767	243.899
P80723		11.3882		11.308	10.2226	6.45577		6.24578	7.97293	8.12336	14.3359	11.3281	7.44567		6.84359	8.03495		10.676			5.00139	10.1467	5.56664		5.83896	1.64072	19.0763		10.9241		2.22206		5.67417			8.11661	9.61049	18.1791
P80748	460.503	547.757	819.012	512.777	1076.4	853.257	398.694	583.424	216.494	444.943	761.419	1037.56	703.68	375.453	990.629	560.368	783.175	901.847	1496.48	329.182	1012.11	657.842	665.641	833.443	1144.51	175.939	256.826	677.672	189.887	1170.3	960.969	1541.95	240.838	485.553	1489.05	10223.7	339.22	603.739	543.209
P81605	87.9143	35.9117	17.1176	34.4743	25.0525	129.521	57.7653	59.4677	53.677	42.7895	71.3857	26.419	40.5497	55.8986	62.4188	44.4482	166.41	33.9202	50.9966	1223.33	29.367	35.9968	68.1909	53.382	105.664	41.6337	85.3263	29.3615	41.5099	54.9103	49.1815	44.1924	46.4225	49.1284	102.744	56.8875	82.3577	96.8656	30.4854
Q01459	8.64043	13.3297		8.91706			8.26213				12.6276		8.12618	8.16853	7.16051		7.38695	8.32821	4.07106	10.1355	10.0281	4.83293	9.17109	3.49527	13.7627	10.9608		9.02346		2.62077			9.98985	7.01591	4.69865	7.40163	5.91644		7.15438
Q01973	250.872	248.355	545.065	550.255	347.641	171.034	276.507	197.666	286.467	376.186	571.216	377.794	359.959	351.713	368.765	294.744	321.408	397.217	283.089	531.968	289.67	135.345	380.901	229.688	374.519	579.538	256.048	376.902		468.106	158.93	276.23	299.235	374.174	270.061	262.978	297.22	244.899	363.415
Q02985	397.073	453.806	975.283	648.826	768.1	708.735	639.747	530.824	812.155	621.249	638.397	450.339	500.752	368.408	564.008	625.199	523.095	421.137	362.487	205.616	324.526	493.063	433.535	429.979	587.333	422.526	419.216	637.545	163.073	366.364	613.062	583.959	486.245	580.755	371.333	425.947	455.674	191.804	516.276
Q03591	2094.96	2976.95	3267.46	3044.51	2828.15	2676.28	2619.06	1966.41	2522.12	2446.55	2311.71	2378.87	2163.52	2740.6	1783.29	2348.32	1888.65	2362.18	2272.78	1509.82	1866.15	1674.33	2128.5	2089.96	2206.83	2397.89	2061.87	2254.69	1293.75	1991.59	1950.2	1739.5	2155.31	2460.23	1246.32	1799.7	2060.14	1073.63	2667.24
Q04756	120.457	145.331	115.066	149.132	67.0064	149.547	122.896	159.675	148.158	168.175	180.559	132.996	130.612	196.046	157.821	173.671	198.565	133.024	186.277	157.733	109.218	167.402	179.665	111.934	158.653	131.856	181.748	141.659	236.314	158.529	130.431	149.979	173.032	152.567	63.8574	153.293	175.087	106.706	134.729
Q06033	449.576	427.073	472.394	452.139	1179.11	909.462	428.558	747.44	875.453	280.132	586.977	600.385	619.892	735.706	564.88	844.385	544.35	518.63	613.385	541.839	342.367	471.803	446.99	698.1	489.593	567.223	570.597	491.877	757.669	732.265	875.594	361.49	538.217	621.544	431.555	523.602	384.801	478.021	313.572
Q06830	12.2394	76.9187	22.145	16.7173	33.9668	82.2078	39.5315	20.6435	23.7997	43.8407	13.8383	39.0624	31.7722	54.1636	27.5919	38.3355	26.2495	20.6311	11.3795	205.29	53.1315	142.198	58.0122	18.911	52.6336	37.55	13.6047			12.4368	51.417	46.5222	107.258	44.7278	9.543	32.1639	76.5126	50.6968	38.2839
Q08257	23.3418	8.32609			17.3222	22.3356	59.7493	10.2514	24.7837	5.61568		25.8682	23.375	9.25931	16.6905	42.6381	23.8678	13.4972	20.7152	17.1469	11.9166	52.0485	18.2745	33.9696	21.5225	13.0234	23.3384	18.9361		17.9462		33.6452		20.8041	14.8651	36.2623	24.8773	49.1401	18.127
Q08380	339.231	143.231	184.146	231.679	831.767	167.178	137.792	110.745	133.595	231.314	154.613	400.858	413.291	238.84	301.895	342.117	238.341	195.33	440.842	127.801	421.404	922.584	151.217	1167.32	999.801	93.7902	871.129	748.433	224.803	478.852	297.165	477.107	528.321	534.242	285.915	618.527	987.302	271.651	773.667
Q12805	92.4871	90.9219	79.9691	90.1601	114.154	149.43	131.313	95.0059	159.252	79.1536	205.264	84.3448	103.015	161.618	87.9873	141.313	88.6708	71.2288	109.859	117.296	83.6516	116.541	117.197	85.5881	140.9	131.491	115.823	103.381	39.7012	116.189	120.14	51.5243	95.6179	75.5289	104.659	154.609	138.378	118.149	67.5753
Q12907	37.4684	58.1379	25.8842	54.7434	50.5721	44.4601	38.5404	50.891	56.8295	47.1295	58.8279	50.2102	39.8952	49.3348	53.6971	35.1205	78.6367	36.2027	45.6819	45.4032	28.3549	70.6086	47.0517	31.1295	37.6778	62.2443	24.438	40.2017		40.5081	52.9474	25.2605	42.5338	87.7555	8.88059	54.7528	59.0598	33.8057	35.5933
Q12913	9.4304	11.6548	19.4419	8.96402	16.6364		16.3839	14.5531		22.4887	15.6372	17.5752	13.0445	8.43287		11.0284	24.7596	13.0609	18.5352	17.5581	6.50983	22.5963	17.7701		6.83976	15.3164	4.71237	37.1358		13.2219	16.0081	11.9375	13.2224	11.879	9.9386			67.6446	4.38331
Q13093	16.6683		16.0077	7.80446	5.8042		13.6876			9.18722	13.7107	21.582	18.2824	9.06301			13.4082	11.6247	11.951		12.3095	14.393	16.8459	15.0286	9.39596	19.1245	15.5245	24.9237				16.4056		6.89773	18.0263	20.9685		11.8804	15.224
Q13103	16.9937	40.3362	37.9839	42.5264	30.5312	22.9722	41.901	30.7353	32.4319	22.407	45.5817	36.5824	49.4043	35.6801	37.1496	57.8586	40.4477	48.6983	30.8533	48.5044	37.5637	30.7948	26.3911	28.1867	35.883	40.98	37.2665	37.3685	57.4311	45.369	21.4248	33.6673	34.1012	61.82	23.3785	16.7307	20.7538	35.3126	38.5903
Q13201	19.7796	28.469	30.4047	32.163	33.5624	16.1009	26.1685	20.765	30.0651	23.1464	25.4418	32.6885	29.0535	22.7172	18.5915	40.1122	25.6948	29.0301	28.5597	18.9528	31.9552	36.3552	42.9012	26.0192	34.2516	22.3281	37.1454	16.6056		21.3377	14.0887	16.024	22.6269	34.7762	30.5067		22.9441	52.2861	36.3222
Q13402	3683.15	4936.42	5574.67	3349.73	891.243	3736.53	4525.78	4218.09	4491.96	4538.74	3939.89	2582.56	4927.63	4438.82	3710.7	6336.64	3549.71	3254.74	3613.21	3254.16	1847.56	2330.4	5731.52	1455.09	4037.48	5064.39	3157.95	2978.2		4431.06	5375.48	4348.58	3617.06	4550.73	3300.47	3976.89	5060.79	2993.88	2850.18
Q13740	7.5042	9.87542		12.0682	10.7239	7.55566				12.3793	13.4237	8.43686		15.1144			12.3346	10.1378	7.87538	12.1523			10.3064	14.919	11.3685	11.667	11.1756	10.9528		10.8571	17.0363	12.2789	12.884		18.939			15.4708
Q13790	1145.74	801.073	1349.47	1333.42	467.541	1197.83	1079.42	1656.56	1446.64	1126.02	864.356	1042.68	1154.75	1670.63	851.231	1676.94	1535.74	886.987	1956.98	836.883	1037.34	948.692	1342.1	1345.57	537.248	991.675	1466.77	944.046	3562.12	1273.17	1698.06	1229.1	732.098	1379.94	1283.68	1552.1	1455.34	1117.17	1114.34
Q13822		3.31256			8.2898	12.5981		5.07302	3.55778	11.3992	6.71493			5.94173		11.4258	5.6426	5.05164		4.93847	5.89657	10.4489			4.65075	5.5591	7.30103	16.3821		7.87685			8.1916		6.12979		11.5306
Q14126	14.5391	17.6965	9.16324	8.74805	8.93262	25.5021	7.06824	6.68577	10.8005		6.20055	8.00457		13.87		9.37424		8.94868	4.83641	6.99434		9.11451	10.6892		5.04835	21.3325	6.23681	3.48836		9.28426	10.0905	8.27873	9.85017	3.4911			18.0561	10.1617
Q14204	198.035	1219.92	986.688	360.3	125.51	507.685	158.375	986.587	1169.37	1691.52	1177.86	521.256	140.262	752.894	1094.46	1069.63	1019.88	868.448	852.701	816.967	79.4586	161.268	346.547	199.509	72.0404	2284.1	113.671	127.297	42.3619	155.542	244.625	268.247	108.817	52.6493	112.37	96.7305	111.666	259.94	101.465
Q14247	234.223	397.658	287.739	308.039	265.897		340.077		244.566	296.438		279.127			256.104	158.621					297.512		233.015	273.355	251.124			266.237		233.593		225.325		388.082	215.849			240.905	327.937
Q14376	4992.44	2969.77	3956.41	3785.93	3992.74	4085.72	8836.96	2075.29	6100.08	3434.21	2286.56	4717	6761.97	3110.23	3024.58	6115.45	4407.14	2877.3	4002.5	2556.87	5308.45	6188.88	5867.46	3533.81	4164.84	4733.26	5870.95	5233.39		5016.2	8102.35	7759.38	6389.83	6895.72	4515.96	7440.2	6202.13	5189.19	5159.45
Q14515	17.097	29.2716	16.6812	11.3032	24.1487	11.0148	12.6846	33.4723	18.5697		17.6532		8.69858	24.6443	13.8605	31.0312	15.7055	14.5024	32.732	18.3023	15.0694	17.0799	18.8481	15.2695	16.5574	41.1807	27.3567			25.1066			18.3562		17.7928	18.8454	21.1181	20.5635	11.2722
Q14520	464.477	629.689	600.513	765.287	546.069	545.779	404.199	388.815	610.922	462.277	586.879	478.187	440.072	519.549	612.375	483.129	521.158	561.464	486.853	491.593	424.25	431.402	494.828	468.661	496.118	479.844	414.031	499.784	192.973	375.464	361.21	427.778	436.822	429.587	434.378	369.31	436.038	319.831	534.618
Q14624	5378.85	5745.49	6484.46	5660.58	7129.15	7892.02	5178.72	6832.85	8899.46	5852.89	6377.74	7232.63	7299.21	6967.74	6949.87	6531.85	7643.97	7557.84	8410.59	5406.3	6556.04	6314.67	6102.84	6318.43	4776.93	5342.64	5764.89	6081.14	4900.88	6845.51	6265.86	5702.63	6500.12	7637.26	6591.02	6212.58	5181.16	4033.59	7037.51
Q14766	4.21379	10.2188	7.85423	11.0993	6.63112		8.71701	3.61529	6.71554	11.6427	7.35715	8.34585	4.95662	3.76548	6.08718	10.7972	8.79454	8.88707	6.9004	6.36822	10.8853	5.57283	7.5362	8.97091	13.3578	9.94514	9.65575	10.318		6.12935		6.91311	6.04122	21.5565	5.92285	6.14236	5.21969	12.3131	8.85322
Q15063		6.37418	5.84943	12.5528		6.86429	1.60665	7.31263	5.58237		11.9119	4.18181	4.0323	10.5548	7.69053	8.96695	3.45038			7.79408		36.3678	3.24762	7.60098	2.90333	6.82815	1.22603			9.3138		12.1972	4.42442		4.55652	8.9942	13.4659		1.66267
Q15113	22.9025	29.5224	33.1449	24.582	14.4334	11.9761	39.1874	24.3081	55.0108	21.0571	44.2455	27.5646	28.3492	27.7088	19.4938	30.4393	18.1091	18.5009	28.67	29.8308	16.9825	27.0181	29.8093	14.5884	21.0342	36.4447	24.9386	22.3906	22.798	33.8795	33.3781	15.2774	20.8244	17.7155	25.0965	32.0729	33.7964	21.5418	32.6373
Q15166	39.7424	22.1869	25.5105	45.9537	14.2789	21.4206	15.778	28.4176	20.3255	21.1629	31.5008	27.7064	32.1458	49.0907	25.2735	23.7455	27.8299	32.8828	30.7275	19.6515	41.4254	30.8491	41.5524	22.4095	14.5507	40.6986	15.7488	12.8026		31.6556	40.8703	27.1594	23.8069	28.2347	26.2459	49.9195	15.8681	32.125	26.1618
Q15485	78.9316	37.8078	89.2866	38.4006	32.6682	22.7026	43.1634	54.3204	10.3941	39.3759	30.3	45.4563	46.042	46.0338	39.7992	31.7532	30.9108	47.7995	43.748	55.671	58.6833	19.44	41.7351	24.1759	53.2578	32.4367	29.7681	55.0722		26.9711	36.7608	23.1084	27.2491	9.27623	17.0979	7.53769	25.9468		32.1532
Q15582	167.5	153.314	127.731	161.251	276.088	211.65	140.733	109.279	120.985	126.443	105.198	106.626	107.345	112.219	124.807	125.418	95.5551	101.316	121.78	121.066	115.595	155.255	151.32	149.619	150.938	99.3834	144.291	157.479	64.3499	125.194	146.667	145.673	130.259	172.208	138.762	220.138	129.134	125.802	161.775
Q15828	8.6589	18.7956			9.11695	8.02318	11.6895	17.8829		16.8767	12.8741		9.55148	16.7852		18.4732	14.3623			18.8461											2.10488				13.415
Q15848	106.745	105.211	44.4188	105.559	90.5282	48.3927	33.5794	121.137	115.478	65.9282	98.6998	117.819	113.894	344.296	102.18	105.32	113.335	89.6624	114.299	93.4183	62.737	222.357	50.5264	74.3354	93.9489	233.695	97.9288	70.5251		224.505	383.193	42.5719	102.69	100.765	118.829	195.335	99.3563	297.111	128.208
Q16610	109.347	217.294	101.936	133.084	84.7425	287.503	125.061	170.352	289.962	177.579	157.163	100.072	126.179	138.738	143.294	229.681	126.733	119.312	126.292	140.874	145.193	84.8535	190.611	120.257	155.956	218.166	85.0658	67.4899	62.9426	170.86	146.774	76.7496	69.2921	111.399	94.1868	135.749	129.487	141.768	87.1259
Q16706	15.4921	12.6898	9.26462	18.8431	11.1312	9.85947	8.90698	6.73005	7.03123	4.46461	4.89433	6.94992	16.7954	7.49173	9.13712	15.2364	8.68982	13.3372	12.9022	10.279	10.9922	6.66695	8.334	14.8977	13.4485	9.62399	6.87303	6.83186		11.3679	17.5963	6.13151	8.08515	5.29408	6.87857	13.2948	5.50488	41.5966	8.55848
Q16853	38.4187	33.9279	33.1127	28.6052	34.0064	44.9261	15.3008	10.737		37.7695	31.2533	23.7079	20.5411	33.9606	19.49	23.1189	22.4787	22.4227	27.4384	32.0116	20.4705	15.8868	19.0734	11.3252	32.5963	52.991	18.8608	8.21887		29.3529		28.8912	41.1019	21.3448	17.3273	50.7082		38.0002	15.984
Q4G0P3	5699.17	4485.47	5270.43	4293.53	7079.36	6962.46	5619.29	5910.33	6842.88	7918.15	4749.24	6478.17	6083.95	5368.41	5627.23	4212.56	4795.85	6287.85	7100.79	4507.66	6334.56	5881.05	4895.88	7657.89	5211.36	5644.85	5472.27	7212.09	1784.73	6677.31	6403.95	8104.34	6403.27	6770.21	5205.95	5840.2	8009.7	5584.73	8462.93
Q562R1	83.8135	251.716	118.775	75.8397	140.425	94.8231	118.842	79.8186	97.6335	119.466	161.474	31.7374	73.2157	281.57	92.1911	168.991	41.3574	85.8666	102.342	585.89	82.0359	98.2179	67.9189	89.0498	93.7026	275.289	115.881	122.911		80.3252	40.824	50.5572	66.6435	71.3806	49.646	80.9446	78.107	232.28	84.9216
Q6EMK4	52.9074	50.6591	36.1292	49.8216	65.3975	60.0707	46.3814	50.1239	53.0148	34.5794	56.1962	31.6409	28.517	48.1479	51.2222	48.7775	34.6766	42.3397	54.2961	51.7712	24.9936	44.7154	41.7547	23.823	46.1079	72.9063	41.6466	45.7882		48.5217	58.9129	33.1995	33.6905	36.0376	26.0693	52.5047	48.7059	31.1359	30.6668
Q6Q788	7.15753	7.82453	3.92496	9.21702		3.25619	19.7106	9.01973	9.13364		6.3264		10.8914	6.78695	19.5519	6.28075	10.6527	10.9171	8.44663	3.35443		2.29491	8.41398	15.3824	3.36302	10.8373	4.68978	6.92844	9.38419		10.4783		8.79941	4.6841	7.80652		15.7673	5.04036
Q6UWP8	1.53536			0.916562		3.08042			1.65375		4.51023			1.92062	1.47798	0.840604	2.26955	1.26279		38.1137					0.671706	2.00388				0.750247	6.34932						1.30522
Q6UX71	14.8023	39.459	23.3949	26.8805	20.0803	24.1613	26.6733	29.3316	22.2693	25.7566	57.3282	14.2038	21.4617	27.6052	18.6417	21.4575	23.5064	19.8171	19.8855	33.9499	22.0538	39.1007	23.0393	10.8819	20.1479	65.6776	25.4225	12.9436		26.3059	28.242	26.1362	14.2777	8.90406	22.3633	25.6343	26.4726	26.9928	13.3487
Q6UXB8	18.4666	17.7545	16.345	17.1093	6.44611	4.8918	23.1002	12.5412	13.8285	25.8569	56.4482	14.5864	16.6713	44.7006	16.0727	34.7532	10.6705	9.49416	33.0896	23.0634	19.8334	32.5488	27.4451	14.4178	30.8315	49.0348	27.3387	12.5682		32.7594	54.5975	22.2086	22.5631	24.8126	23.346	53.1346	42.0123	11.5377	7.1621
Q6UY14	1.90176	4.48198		3.47844	5.78544	19.5335	2.31443	7.25896	3.22654	3.83817	5.64281	7.92721	6.75196	5.36537	6.05396	3.41624	11.0054	8.04545	2.20098	3.7175	6.25119	4.56787	2.63177	10.5431	1.9972		9.03448	5.20551					3.93149	6.42335	8.16811			2.57727	1.6738
Q6YHK3	13.7874	6.57414	3.99566				7.24591	3.35863	8.52655	5.09686	11.3154	8.14524	9.45176	22.8664	7.70092	2.07799	8.20341	8.79502		8.72561	6.70493		7.32412		22.5148	6.65477		27.2502		14.3485			5.66847	6.2288			19.923	13.3751	15.0432
Q76LX8	11.5103	15.5902	7.72598	14.1145	7.19793	9.02452		10.2826	11.8443	5.74755	13.2242	13.6847	14.2698	10.3729	9.80832	21.7955		10.4376	15.2134	13.8114	12.9638	14.456	11.2564	11.4064	17.442	11.0365	13.2235	8.2735		9.70392	6.82223	8.83189	7.67533	13.1074	18.8672		10.7883	42.17	10.3328
Q7Z7G0	10.4316	14.9023	9.60688	15.3969	7.68849	12.0777	8.46893	6.42084	4.94562	12.6038	10.2679	12.0191	4.08807	1.67778	11.9962	3.87868	4.04732	2.22718	8.83496	5.3418	7.25151	8.91532	14.1511	7.90993	8.05295	13.6236	9.0873	9.41244		8.98422	5.34091	8.60931	4.10727	6.34644	6.17906	9.06741	12.0712	5.1188	1.97123
Q86U17	9.84373	11.3903	15.5294	11.4805	20.7726	13.888	23.6016	7.50218	19.8995		19.2061	18.334	19.0607	24.9297	16.0732	13.8367	19.446	15.4339	19.7235	40.3227	14.1447	36.2186	19.5689	22.5403	10.009	18.4254	26.1295			15.2229	16.0176		28.8149	24.0317	9.0874	12.9209	20.5726		20.08
Q86UX7	1.216	1.723	3.58745	5.37711	1.45298		3.18756		9.67724		3.18517		1.18591	2.52436			3.72237	1.70749		7.59118		3.67138	1.83939				3.94906
Q86VB7	16.3342	14.5356	8.28487	9.6771	19.2144	14.4739	13.7568	6.45478	9.15781	12.1697	16.6723	15.8815	14.1479	10.8459	7.82913	23.2787	11.8275	13.8571	14.2711	22.9057	7.99014	26.1512	13.1241	15.125	17.7409	11.4766	9.6399	20.4541	10.8252	11.4797	6.33727	10.0054	10.1477	11.1463	19.2133	13.7025	11.8862	37.391	5.66227
Q86XI8	428.98	412.231	175.817	136.22	354.156	403.305	514.48	540.942	315.562	527.706	160.071	678.914	168.273	582.438	138.86	225.397	653.607	449.37	57.1763	93.9724	576.802	1201.64	158.254	581.847	376.089	156.17	356.295	592.211	2404.68	323.616	570.813	563.89	388.349	208.688	600.26	458.83	516.224	1000.67	642.362
Q86YA3	34361.6	68414.3	59560.9	56706.3	23515.7	59639.7	6528.85	72575.7	87245.9	100324	64701.3	54799.8	24930.9	71142.4	55114.9	80072.8	77528	71054.5	74293.4	65056.1	43339.8	8277.66	54502.8	17025.5	2506.01	120235	3472.04	16195.1	31929.5	10686.4	24511.9	35461.8	887.366	1694.6	927.59	11907.7	4592.11	30627.2	16315.7
Q86YW5	9.12768	40.6627	63.2773	72.4781	65.6935		73.2327	37.2918	47.0993	58.8999	58.2792	39.7035	43.8186	26.0496	39.6799	101.676	44.3719	94.0331	61.0928	38.3215	9.16297	13.7577	48.5931	30.5049	64.0983	52.3016	97.8761	72.9026		44.4564	47.8879	41.2467	37.7791	42.7951	9.67915	55.596	15.2836	55.0162	34.117
Q86YZ3	2.27517	2.85033	4.53826	5.89976	3.28265	8.58063	2.30489	7.51502	9.23328	3.53222	6.72934		3.04549	2.46482	3.23563	2.18553	5.35119	4.41896	1.35029	191.36	7.61632	4.31178	2.8505	5.12555	4.52597		8.06338	2.29527	41.2493	2.76039		9.50318	1.37762	3.26094	3.6322	3.89109		5.69185	2.79684
Q8IW75	252.8	91.6802	176.431	104.042	187.794	155.946	469.278	95.6028	191.305	100.511		310.672	272.494	150.819	105.99		225.849	186.388	247.358	122.478	206.769	450.952	229.139		147.987	232.093	189.319		425.285		339.75	303.13		160.413			229.674		220.822
Q8N1N4	10.817		424.41	369.101		426.022		778.336			159.839			19.8625		1519.35		17.2336		502.652	181.477	747.594	97.9401			64.8279	64.0713	69.8105				1134.27	210.831	202.936	29.791			34.1885
Q8NBP7	19.7118	18.6188	18.7324	14.9117	12.1635	14.296	12.3515	15.9033	11.5666	22.0311	21.2571	9.54414	13.5577	22.8727	13.1108	32.8536	10.702	20.2251	9.03546	28.1461	13.7605	14.2511	18.1123	10.3185	11.3227	12.156	20.6291	12.1271	15.7202	14.7576	16.6928	14.7732	19.7189	8.2079	3.24545	15.0502		21.062	30.4944
Q8TCY9		153.653	122.489	79.8168		55.0186		143.352	109.23	114.73	94.501	43.2536	110.827	75.7491	113.706	208.598	214.134	151.898	81.4992	155.864			211.752			107.463
Q8TER0	4.29173	15.2861			5.24426	15.2295	5.03569		8.20798		2.81145		2.07355		4.64267		2.50594	6.12798		1.89653					4.4588						3.96624				7.32286
Q8WWA0		8.4671		5.29951			13.2903		18.9743	29.7564	12.4259	3.69284	4.90166	10.2712	9.71507	26.521		6.37413			11.2697			8.86389	11.6357		20.2512			11.7311			9.95097	14.2904	11.5464	10.7256	13.3135		9.97273
Q8WZ42	2264.08	2316.01	1363.74	951.211	918.308	2221.91	2196.02	881.176	1193.76	1333.71	997.372	1227	608.651	3629.55	748.654	2110.97	742.035	528.452	1202.34	2897.4	1776.36	225.587	1402.83	602.423	3316.56	2555.49	2505.43	2319.44	1310.08	1393.32	1353.25	2399.36	635.533	730.885	770.048	1089.74	1545.77	2303.82	1924.38
Q92820	58.7826	38.4647	48.9904	38.0366	57.5245	31.2388	33.0495	26.7314	28.2339	44.1929	68.9929	30.5507	31.5161	30.3322	40.495	67.7973	39.5544	41.4465	35.7824	52.6998	31.1523	34.9087	31.1619	37.4463	63.9621	35.2174	35.6812	49.4147	44.5424	34.8118	45.6534	40.5738	31.3684	62.9988	37.7109	40.445	41.6126	53.4482	35.2735
Q92835	961.908	56.3348		70.0551	25.2278	109.254	162.544	125.554	161.79	42.3819	232.123	70.0793	59.9844	38.0907	55.9207	17.507	117.174	66.1782	118.627	81.6981	152.821		348.668	260.7	51.7104	341.073	432.137	308.306	301.513	684.919	901.153	1313.39	432.35	369.203	86.0956	394.821		1020.79	681.485
Q92945	11.268	18.9279	32.1315	15.2465	36.7017	36.8866	22.0737		21.4028	35.2308		57.2181	8.98626	61.2784	61.5312	20.0725	46.4017	43.5021	33.6971	30.9608	5.68072	2.1504	5.64328	29.4222	25.5859	56.3422	29.2064	18.8869		36.5696	44.2406	8.27431	39.1276	14.502	42.0712	54.1352	26.37	10.3332	19.8039
Q92954	166.267	154.174	195.205	156.191	91.9541	80.0256	130.027	90.5358	51.6208	175.968	153.713	98.6089	94.817	116.455	150.909	160.661	98.0787	150.335	138.555	127.627	82.7928	56.788	176.5	111.565	180.288	108.247	123.624	211.614	100.324	81.2454	61.6547	99.6185	100.696	71.8943	74.5813	65.7789	76.1751	91.6115	200.517
Q96IY4	329.059	265.488	304.381	227.751	339.613	446.041	275.469	250.143	228.133	313.56	218.016	290.347	317.274	262.075	279.371	247.314	224.786	277.074	253.839	203.778	275.996	308.977	232.385	288.659	121.093	228.882	262.631	326.265	196.092	273.442	314.508	307.484	301.315	412.872	319.679	316.095	258.197	313.751	459.103
Q96KN2	193.417	269.086	233.456	284.751	119.398	109.808	145.983	257.615	150.602	216.777	263.193	150.851	150.171	258.536	222.329	182.716	176.89	241.18	84.6435	231.084	200.263	177.085	250.688	157.299	217.058	201.405	243.59	292.501	957.821	135.843	186.379	173.898	237.093	108.149	140.131	101.908	190.341	142.545	240.567
Q96PD5	1365.29	1708.64	2106.36	1801.59	728.969	1336.43	1262.18	1736.23	1765.29	1574.95	1976.63	1809.24	1797.76	2019.97	1921.69	1873.08	2089.1	1771.41	2036.07	1578.2	1381.77	1508.22	1874.33	1344.03	1169.41	2351.92	1901.49	1622.12	3112.23	1973.54	1325.88	1624.83	1679.28	1523.64	1771.01	1506.5	1590.97	1614.75	1531.62
Q96QR1	4.68832			9.37855	8.50892		6.27479		11.2654		8.31071	3.77548		10.232			6.84142	8.77564	23.5829	2.10753	4.22252	3.6382	3.77436	5.38271	3.55543	14.9769		4.0245		13.5372	8.34974		10.231		11.0081		9.98941		1.44365
Q96RR4	77.4254	124.06		106.812	70.8256	81.8336		100.736	77.9965	97.6082	140.98	89.0224	46.0974	74.1884	83.7276	85.0086	118.583	111.831	107.334	154.043		77.6478	74.3092	81.6077	94.6062						57.3991			83.2382		71.3974
Q99784	11.4453	24.3979	13.4531	16.561	9.09671			26.628	30.3237		31.7422	35.4259		30.592	21.2657	22.0252	33.0755	37.9016		38.3245					16.9074	41.317	11.7104	21.6284		8.99111	20.3947		13.2083		9.29396				6.14839
Q99969	12.3699	19.2122	26.2693	20.8705	17.7073	11.2969	21.7535	9.41273	17.8233	17.4808	17.7872	9.53937	20.4904	24.1635	12.1524	28.8851	19.2151	14.0418	20.3777	27.9675	18.4186	8.28328	16.5423	18.4577	31.5508	20.7237	16.5348	19.5125	43.8129	13.5141	13.1101	13.688	19.7385	14.7153	16.7667	22.5802	20.4534	13.4185	22.3208
Q9BUN1	78.2699		59.9394	106.118	32.7715	35.5723	47.6057	97.203	79.3849	76.2746	90.3893	39.7629	61.7169	100.195	60.7184	83.1488	96.6833	53.1238	62.3947	39.2836	69.4315	37.7956	72.5235	64.1039	36.6483	131.821	25.9076	40.7073		73.4332	131.319	42.7869	56.027	109.02	2.96413	97.4056	53.734	67.9395	62.5978
Q9BWP8	37.8812	52.2145	26.7958	33.6718	19.2	40.7716	46.1963	39.8358	75.4788	31.8789	18.3541	27.286	33.0821	43.5255	35.314	38.0845	38.2988	27.4646	35.0937	32.9432	19.793	28.0255	36.7575	13.7731	27.7064	33.8896	32.6891	33.7871		35.2065	20.6833	20.799	25.0758	18.139	32.6306	35.1319	28.5932	46.4815	34.3639
Q9BXJ4		1.64421	5.51055			2.4035	2.54979		5.22894		8.20967		6.97287			5.39309				12.2139					12.7329	19.6067				9.47742	5.42792	3.65448	6.0836	6.7771	2.11321	5.43141	4.0478	5.87263
Q9BXR6	57.0532	69.7708	75.142	52.9402	55.8047	36.0522	48.2235	56.7354	54.6896	40.8065	96.0596	69.3138	52.4671	65.8638	53.5294	44.1069	58.035	86.9201	37.2594	38.7561	52.0776	24.875	36.3996	52.9915	51.5142	66.4499	48.4857	37.9833		30.156	45.2716	44.8976	40.6147	25.3647	40.1132	40.056	25.1753	24.9916	46.4184
Q9C0B1	2441.1	3320.18	3218.39		1761.69	1964.43	3339.45	2830.45	3070.48	2819.51	2767.57		3952.66	2857.52	2571.59	3597.55		2358.52	2753.56	2517.42	2772.54	2337.64	4135.94	1487.74	2674.4	3358.44		2322.09		2707.6	3303.22	2289.05	2943.29	3171.85	3236.28	2615.25	3375.72	2613.25	2065.79
Q9C0I3	10783.9	9564.72	10069.7	11757	5199.01	15938.1	14456.7	8454.48	15144.4	11111.6	8970.85	13054	12475.3	10778.6	9939.22	15846.8	16484.2	11420.7	11259	7072.83	14300.1	13225.6	13703.4	13054.1	8264.19	19999.8	12551.5	12155.6	13953.8	14399.5	20615.9	16241.9	13582.8	12852.3	8365.88	11951.6	14440.1	16000.1	12804.1
Q9H4G4	21.0258	12.5659	6.71951	8.6228	7.31624	4.6033	13.6768	9.80974	9.70711	7.99539	16.5007	10.3234	14.1768	30.4769	14.1467	11.8098	22.5796	8.02445	15.81	12.606	7.41579	11.6221	11.569	14.7223	11.9164	20.1226	10.806	18.506		20.2237	6.54434	4.86804	9.37973	10.9548	18.3041	15.7317	10.7449	9.69964	9.38701
Q9H8L6	11.4163	9.86939		8.4928			9.43215	7.28286	16.6676		8.99595	11.737	7.00328	6.26311	7.69285	3.28959		15.6722	4.98718	14.6924	10.0411	9.59007	11.4117	7.52481	10.5628	17.6826		6.16551					15.7515		8.84503	9.62188	7.25164		4.71631
Q9HDC9	33.7764	94.9626	73.1319	64.3066	36.723	138.786	55.9885	97.8754	48.4087	57.0385	59.4846	56.1937	74.6453	112.01	67.7404	49.4764	55.8107	83.8928	67.4077	63.0143	56.6025	65.0903	54.4955	72.1346	65.9254	69.5842	75.8516	47.9501		63.7828	88.8269	44.066	58.1191	51.1293	73.1037	60.8512	96.2281	68.1019	84.0842
Q9NP80	119.436	256.177	71.0311	239.98	292.391	112.15	37.8764	279.63	216.274	151.66	222.687	297.63	117.561	446.35	129.387	104.012	88.6968	64.6554	86.4898	58.61	281.905	209.104	57.3459	294.315	264.151	132.653	452.747	293.708	179.327	227.483	351.394	187.199	62.0547	398.446	311.081	63.3574	182.042	419.725	88.3017
Q9NPH3	33.6968	18.5432	8.88876	17.723	8.06117	10.5829	5.8419	20.0558	23.7965	12.4485	10.5527	22.4985	15.2982	18.9871	26.9664		13.52	33.7901	18.5295		10.1288	23.2776	19.0092	28.2482	5.5568	4.9221	22.2731	8.13575		9.85264	16.4726	11.5144	12.0997	29.9203	10.9899	4.60413		40.6605	18.9162
Q9NQ79	31.8274	29.1959	27.2157	44.4308	30.2368	34.5786	35.1805	45.3551	56.5729	31.3517	56.2495	60.5201	58.2201	52.1184	42.9654	34.5753	43.1599	27.1325	40.5361	62.3267	73.6717	21.4495	29.1705	41.3962	50.8814	58.7017	68.0011	47.6779	138.122	62.7447	49.8835	44.3849	38.2237	43.4211	39.7067	55.9905	60.4571	66.0731	46.8336
Q9NQZ6	107.001	44.5602	76.2903	70.5974	52.3162	128.74	114.335	39.5693	124.684	49.5266	71.9489	107.843	121.166	103.267	76.0872	116.78	120.392	75.7034	80.2571	45.5529	79.711	69.3276	110.43	96.3681	79.5395	105.977	97.694	105.488	139.95	123.963	186.842	116.54	116.292	90.4723	88.1787	114.39	144.716	110.084	97.7106
Q9NZP8	489.675	560.08	658.631	732.21	829.477	710.503	623.375	537.562	517.12	528.206	648.789	483.814	475.18	449.798	562.755	614.223	677.757	871.053	735.85	449.75	519.585	776.836	577.548	570.924	499.649	510.553	550.558	615.417	368.846	596.919	650.454	383.079	546.161	616.781	602.169	602.796	558.832	671.363	446.088
Q9UBF2	158.846	39.9632	26.9591	69.3696	273.275	145.277	135.979	130.465	44.3168	47.1033	108.671	125.667	126.425	56.9621	110.57	109.623	24.7029	58.4637	110.098	41.2208	211.62	187.58	53.8334	476.454	339.404	21.3422	218.055	521.84		405.488	602.486	333.484	336.229	340.244	215.646	843.908	298.734		569.386
Q9UGM5	256.061	446.719	412.793	325.502	416.464	361.234	350.657	221.072	373.6	337.859	539.653	314.237	358.234	325.153	417.305	309.758	284.472	426.312	331.474	297.674	508.246	526.291	295.206	302.255	385.445	414.099	338.705	440.675	484.28	336.325	318.983	331.341	303.989	307.926	343.007	220.992	273.706	361.102	368.604
Q9UHG3	126.081	138.753	114.339	142.326	67.9987	89.2073	84.0958	87.7243	72.4251	105.015	113.442	64.2936	96.7613	135.366	110.683	94.7429	109.571	99.7864	92.3249	63.2047	90.074	60.7293	147.187	107.554	72.7824	163.481	87.2407	87.3503		94.4568	101.611	88.7133	108.564	56.9978	80.1476	124.146	86.1133	66.2901	136.531
Q9UK55	163.861	165.594	266.619	252.508	149.448	207.711	136.748	164.329	158.029	180.774	177.005	119.141	130.158	155.224	170.854	181.851	200.505	215.824	197.003	152.998	87.9185	95.1722	180.215	171.366	112.258	190.488	128.71	156.239	182.391	150.349	116.85	107.625	139.396	232.66	172.748	67.0365	135.526	118.201	249.559
Q9UM73	135.337	26.2144	49.3806	33.8309	102.238	54.0139	378.096		110.669	44.9022	27.4339	82.9907	116.247	26.5348	31.0687	199.133	67.5401	42.7524	74.7637	35.5995	90.5787	213.312	92.0935	176.295	47.0984	156.029	150.447	165.604		89.1505	330.732	281.978	157.737	129.823	36.2153	293.547	99.9021	80.2842	147.887
Q9UNN8	70.8144	35.1499	27.5573	34.5781	32.4336	52.2836	40.4411	73.9857	28.5719	63.4942	48.0537	25.5437	31.3394	45.0082	42.9845	50.9336	34.6747	19.211	30.6223	27.8943	19.6438	56.6747	39.9103	20.284	111.145	63.661	30.2528	40.2573		41.141	45.7401	73.8561	33.6445	29.0422	29.0764	40.7786	42.769	59.7796	23.6421
Q9UNW1	34.4767	10.1121	18.6007	23.5151	18.7854	58.985	20.4952	22.3708	17.1612	31.5091	10.055	6.38747	13.4937	47.5121	14.2748	31.0907	20.7662	5.59297		18.2503	9.64085	46.9773	14.6581	10.7212	19.5431	9.98062	29.9427	15.8154		27.6565	40.2477	50.9615	20.9859	41.3115	5.99268	36.5686	43.9369	84.2798	32.409
Q9UPP5	35.3692	261.442	375.496	305.083	101.602	393.061	71.2613	189.805	608.404	303.209	342.883	269.914	237.031	160.13	234.91	593.575	466.604	531.084	548.361	344.805	132.156	54.967	462.175	41.0596	32.917	486.003	8.6675	29.5853		134.826	139.052	104.417	29.9771	37.1693	23.8694	52.9752	42.7688	36.4309	41.2909
Q9Y490		5.22401	4.6591	5.44442	4.04107	1.7283	6.78497	5.79564		9.24257	4.66612			4.73823	4.75297	6.1364	5.98357	4.20735	2.27502	7.11131		4.25283					5.36056	2.80121	3.28026				2.26199	7.09041
Q9Y5J7	143.908	17.0493	57.0177	40.0899	105.172	48.264	224.635		115.6	48.8745	21.3665	125.609			16.529	34.4088	32.5502		25.3699	22.9161	105.891	152.86	29.9971	154.398	77.5084		204.581	117.455		112.109	205.677	284.135	139.205	166.814	59.352	211.488	145.967	185.207	144.455
Q9Y5Y7	32.9347	85.657	40.9979	54.0216	34.9751	62.8999	46.7363	61.5984	41.407	44.7328	130.888	60.2407	57.9455	104.961	41.0832	61.6233	44.6627	54.2742	75.7146	105.816	40.9438	34.0897	72.5569	36.1649	56.0162	96.7744	57.4921	63.4281		120.06	101.072	69.712	85.814	46.0068	84.3944	62.0066	61.2392	178.587	29.4498
Q9Y646	11.5263		4.50782	6.67915	12.3212		6.71136		9.56467	11.6116	12.783		11.5133		7.77194	41.4548		8.40735			23.1895	8.88058		9.00886	8.54736		9.58209	14.7279			25.8278		11.9209	11.191	17.8115	21.7841		5.76869	5.01984
Q9Y6R7	87.3905	77.1115	33.3947	51.181	132.755	116.757	58.9338	69.9674	187.377	140.064	70.6322	101.031	105.846	141.873	86.7472	96.2302	91.3968	64.8782	50.6837	81.1386	69.2476	128.65	101.668	77.0627	133.929	77.6968	106.748	92.9794	104.352	132.118	74.7953	155.648	110.072	83.9609	88.2528	157.817	144.765	120.421	94.4771
Q9Y6Z7	24.979	24.4587	18.6092	29.4948	11.7815	29.2652	31.5059	26.7778	54.7023	12.5364	23.8659	29.3243	18.5797	29.8227	27.0936	49.9826	20.7682	19.0969	19.0916	20.7373	21.8539	22.0475	28.4949	8.94312	37.8759	32.7081	22.5453	33.1461		17.5067	28.6219		21.91	13.5287	8.61941	25.2043			31.9172

## Sheet: DIANN-serum
Protein.Group	AC1	AC2	AC3	AC4	AC5	AC6	AC7	AC8	AC9	AC10	AC11	AC12	AC13	AC14	AC15	AC16	AC17	AC18	AC19	AC20	AD1	AD2	AD3	AD4	AD5	AD6	AD7	AD8	AD9	AD10	AD11	AD12	AD13	AD14	AD15	AD16	AD17	AD18	AD19
A0A075B6H7	631649	427261	406766	304562	546228	311299	870231	353037	255569	258032	350379	434370	713090	393291	381248	384824	210042	330284	216026	301425	685580	504449	377692	506818	902925	335610	686018	903276	3399.67	664071	925544	938929	705018	502616	638889	609594	821455	695718	731035
A0A075B6H9	101650	72622.4	69302.4	51787.3	80072.4	47616.3	61727.3	32529.2	64199.4	47647.3	153998	67590.4	92666.5	31542.2	48829.3	114066	55994.3	33299.2	40789.2	60113.4	54107.3	102844	55194.3	86995.5	107539	26860.2	70617.4	51378.3	101976	90280.5	82238.4	76442.4	71510.4	75901.4	144028	50524.3	97131.5	108723	65001.4
A0A075B6I0	220889	192804	339562	55519.4	235213	201844	28484	209711		167016	628095	111082	134588	267275	179094	272738	42760.4	39486.4	126535	139704	168604	328066	195689	57152.7	230454	120068	47627.4	143953	1898.9	187279	208775	164847	175650	118022	200291		186392	319921	3114.38
A0A075B6I1	13378.9	13286.6	7527.94	7475.59	25770.4	8920.11	10249.2	5955.78	11644.6	12927.9	29151	9668.54	15588.8	7442.91	9812	11236.3	11120.5	5793.56	12037.5	7690.06	1855.57		2791.11	8122.23	24928.8	12747.6	19094.3	21309.1	17345.8	1715.96	19521.1		16281.9		23399.2	11042.1		10041.5	3025.72
A0A075B6I4	19247.1	15415.1	6508.02	1910.01	16349.1		11215		7864.03		11104.1	10628	15728.1	5200.02	7576.03	4533.02	6335.03	5151.02		12445		7859.04		5565.02	11949	11131.1	11885.1	12222	8006.03	14350.1	2735.01	10840	2030.01	2849.01	13946.1	8530.03		10762	9182.03
A0A075B6I7	22569.2	29462.2	13047.1	14556.1	21135.1	16163.1	16137.1	15160.1	18603.1	21480.2	25152.2	29239.2	21355.1	12058.1	19116.1	10839.1	17643.1	9189.06	7010.04	18973.1	20431.1	26419.2	5641.04	11886.1	20690.2	9687.07	13947.1	21415.1		30091.2	19901.1	18887.1	14801.1	13732.1	25407.2	13846.1	26731.2	27535.2	25943.2
A0A075B6I9	12800.1	12286.1	14838.1	4273.03	13657.1	6911.05	8267.05	3800.03	5443.03	3545.02	16213.1	10470.1	12885.1	7404.05	5523.04	11297.1	15703.1	6350.04	5914.04	10082.1	10193.1	24794.2	7124.06	8337.05	19863.1	4324.03	16257.1	21513.2	962.007	16432.1	36089.3	11626.1	17596.1	10706.1	20799.2	11595.1	20026.1	16797.1	9052.06
A0A075B6I9	121553	173806	76359.3	101657	163271	146619	157774	77543	97792.8	76831.5	219716	93880	145501	137344	100877	130753	139089	69631.4	65785.3	106624	127063	163759	126040	83909.1	126172	46495.4	167467	149748	6251	151189	176083	167687	174667	103821	244625	104800	183748	187123	96323.5
A0A075B6J9	14776.6	19852.2	7933.09	11582.3	19139.8	9866.17	14469.6	7847.05	7826.49	10008.5	14128.5	21402	17103.2	13331.9	18204.4	11501.1	31689	15820.8	7143.34	16605.8	22029	14264.7	11966.2	28852.3	22309.6	6552.49	10777.3	16008.4		17654.9	22117.7	7134.49	10531.6	16629.7	20470.4	13352.3	17273.4	12272.3	17234.4
A0A075B6K0	4098.39			1983.76					2427.9							1553.5	3365.75			1817.21	4665.46			9203.04	4819.13		10322.2		1249.15	12363.1	6029.61		5249.39		7509.75	11605.2	5796.63
A0A075B6K0	12777.1	9244.06	15678.1	11578.1	5981.04	11377.1	12693.1	11128.1	9027.07	10972.1	13091.1	16970.1	12841.1	12118.1	8926.07	23093.2	12947.1	13341.1	8884.06	10093.1	11055.1	6997.05	8466.06	24950.2	8117.07	7559.05	14538.1	30881.2		13667.1	24417.2	12157.1	19034.1	6334.05	21049.2	12677.1	11614.1	15510.1	11714.1
A0A075B6K0	54628.1	42478.4	30309	53755.8	61092	55944.8	33003.8	33606.6	27064.5	51021.9	44674.9	54372.6	76068	52553.8	54645.7	72617.4	39181.3	69944.5	32749.8	41505.5	37149.3	61543.9	56587.3	82919.1	119453	37062.4	32858.8	86131.5	22488.6	52707.4	58492.8	52138.8	80099.9	62731.5	51477.2	37954.1	59664.3	67753.4	82959.5
A0A075B6K2	12856.1	7163.05	7496.04	4152.03	29786.2		14459.1	1183.01	2578.02	2537.02	4983.03	9346.06	23827.1	2906.02	12514.1	7277.04	2251.01	3840.02	7010.05	6967.05	16706.1	15484.1	7315.05	20909.2	16862.1	2150.01	11370.1	23263.2	29503.2	24211.2	18462.1	18050.1	9852.07	7955.05	47444.4	38240.3	12425.1	15065.1	22521.2
A0A075B6K4	8076.07	7872.08	13975.1	8783.09	3228.03	4671.05	14027.1	4374.04	9888.09	7888.07	9847.09	10931.1	14256.1	8214.09	5540.05	12862.1	8941.09	6343.06	6306.06	9395.08	6708.06	3729.04	7501.06	18365.2	5153.05	6667.06	19201.2	24866.2		10702.1	14851.2	5035.05	21210.2	4172.04	15713.1	10519.1	6065.05	6230.06	2650.02
A0A075B6K4	37357.2	50992.3	44956.3	42766.3	27881.1	68507.4	65811.3	62770.4	56713.3	34924.2	46825.3	44559.3	69663.4	47055.3	46477.3	79014.4	61112.3	47809.3	48452.2	27985.2	28051.2	48509.3	50398.3	100552	43768.2	22640.1	40308.2	57759.3	12500.1	33960.2	109291	39777.2	64024.4	34932.2	89722.4	104679	45919.3	75394.4	55940.3
A0A075B6K4	67951.5	21795.2	28137.2	22215.1	58791.4	31311.2	63736.4	14636.1	14773.1	18977.1	26834.2	54077.4	78362.5	23527.2	17443.1	36459.3	15158.1	17570.1	17584.1	20228.1	55332.4	56117.4	23920.2	66464.5	78427.5	14630.1	50496.3	162013	25522.1	80800.5	81907.6	82784.6	115653	45456.3	67577.5	36093.3	56405.3	78764.5	55992.3
A0A075B6K5	16607.6	18313	21259.5	18007.2	14541.7	16159	16712.6	14043.3	18143.4	13108.8	34577.2	19236.7	25815.6	17240.8	26550.8	43141.4	18290.5	24549.6	13903.2	13809.4	22741	21396.2	15158.4	35505.4	22527.7	18290	23260.5	36325.7	9740.42	26439.6	33218.7	21766.7	45705.6	12384	28885.9	31245.7	21520.8	27504.2	16299.2
A0A075B6K5	40682.4	29145.3	40946.4	38379.4	65811.6	31432.3	46693.4	28802.3	29609.3	19923.2	57569.6	58262.6	62854.6	38868.4	62704.6	45550.5	54114.5	55704.6	49816.5	28985.3	43915.4	55330.6	27671.3	49335.5	51696.5	12919.1	36590.3	72512.8	481.004	60722.6	54598.5	59369.6	36694.3	26160.2	68436.7	602357	23574.2	30790.3	54971.5
A0A075B6P5	30569.9	40489.1	25810.1	15854.3	57470.1	8376.04	50965.4	19343.2	16105.4	5055.57	61184.5	59576.4	95263.1	29699.3	26128	14803.3	22024.6	30358.1	10946.1	20836.1	37540.2	44085.8	38166.7	32924.3	52624	25789.8	49680.6	55930.1		26740	58026.4	32655.4	53059.4	21397.4	69345.2	37763.1	60751.5	9077.58	39642.3
A0A075B6Q5	7560.3	5690.42	4828.66	8126.36	23109.4	12025.9	5556.19	2247.42	3545.41	3854.92	4815.14	7814.65	7603.69	13678	3966.82	7165.1	10102.3	6701.51		9971.61	8319.71	10434.5	4104.79		7737.72	6219.76	12362.4	16702.6		9490.89	7510.61	8437.96	12643	8057.19	14510.7	8685.75	7813.53	8011.67	8307.33
A0A075B6Q5	3981.02	4745.03	2347.01	3220.02	4812.02	3137.02	5346.02	4980.03	3684.02	2682.01	11030.1	3595.02	3092.02	4647.02	3401.02	4462.02	3935.02	2133.01	4245.02	2861.01	3754.02	6299.04	4589.02	4162.02	5136.03		4853.02	2985.01		3284.02	1966.01	1604.01	3099.02	1632.01	3635.02	2513.01	2492.01	2674.01	2752.01
A0A075B6R2	2054.03	815.01	718.007	634.007	2139.02	518.005	1145.01	433.005	176.002		525.006	1732.02		931.011	890.011	689.007	925.009	1100.01	902.009	461.005	1630.02	3657.04		2975.03	3452.04		2913.03	2874.03	1280.01	2674.03	3456.04	3391.04	1652.02	3729.04	1417.02	1158.01	2930.03	2419.03	3827.05
A0A075B6R9	28544.3	16810.5	16918.8	7578.68	30085.6	7995.29	40826.4	8672.26	9964.53	9869.16	21476.5	29881.7	43392.7	17392.4	17294.3	12500	18873.5	8345.29	7606.77	14486.7	27283.7	16712.6	7658.95	47933.5	37780.2	16043.9	29478.1	46428.3	315.931	34084.9	49570.5	36979.5	44684.5	26245	59539	17103.1	34694.2	16368.6	33925.8
A0A075B6S2	326254	206401	161791	130733	342802	128875	255868	121134	151188	129450	228155	283917	330385	219808	196946	142480	117004	175892	114715	118086	260810	378392	181402	257939	347516	157516	331978	397835	1837.01	338672	309357	293279	361210	266156	371890	260728	334726	270737	279418
A0A075B6S2	11798.4	6068.72	14689.4	6463.08	11265.7	4806.12	9794.08	4468.51	6300.24	9498.56	11633.9	6555.94	10371.4	9804.49	10261	9323.11		5629.06	7454.08	4084.9	3255.08	21754.6	10260	13554.9	17476.4	4174.15	10158.9	27811.3	2623.38	23988	5579.06	6023.61	18193.5	9789.84	25508	16790.3	13397.6	4764.48	11329.3
A0A075B6S5	7528.41	7089.84	6628.12	3343.27	6717.8	2658.1	10644.7	2693.66	3611.39	2408.65	7844.53	6006.81	11361.5	6746.51	3355.49	3689.93	3410.46	3530.5	1872.61	5795.79	7764.02	8202.21	5247.64	9565.72	13682.1	3438.47	9317.29	10452.6	962.544	6670.93	9951.46	5389.29	10678.7	3388.42	12023.3	6505.09	6886.51		8503.67
A0A087WSX0	7249.05	13576.1	14481.1	5796.04	6660.04	4240.03	3921.03	6746.04	14540.1	13500.1	18217.1	19812.1	17801.1	4604.03	9100.07	8456.06	16050.1	5804.04	2464.02	11755.1	5927.04	25803.2	4407.03	6197.04	6472.05	4397.03	5367.04	6458.04		7343.05	23442.2	4774.03	7490.05	3425.02	23883.2	5025.03	14966.1	7525.05	11716.1
A0A087WSX0	10874.1	19246.1	18015.1	8637.05	10118.1	5746.03	12783.1	5528.03	9511.06	9813.05	28617.2	16571.1	22814.1	8255.05	11283.1	12205.1	13082.1	3995.02	3375.02	20090.1	9275.05	17881.1	11008.1	6516.03	11003.1	6602.04	10238.1	9690.05	15735.1	21760.1	13713.1	16163.1	9261.05	7695.05	25613.1	7132.04	27400.1	10441.1	11890.1
A0A087WSY6	30038.3	17105	24447	17189.5	30415.6	11219	53147.2	16136.4	13917.3	8201.46	19875	27990.5	33462.9	16011.8	18030	10598	14272.2	14259.1	10284.6	11256.1	27727.3	49947.5	12164.9	30509.8	35559.8	11917	29182.9	36670	786.736	23445.1	29653.9	28064.2	37436.4	21762.1	34354.1	21350.3	32336	25226.9	31450.9
A0A087WW87	2960.07	601.198	778.445		921.156	683.402			828.228	663.8			1248.58			828.774	704.22	1337.69	490.732		1327.37	784.071		574.781	1224.27			1031.08		915.062	910.985	749.288	1278.85	479.633	1617.93				1089.67
A0A0A0MRZ8	341203	267602	235482	168964	385196	216908	374014	274352	181961	137706	283446	486606	392418	314109	292832	233512	185108	207462	190202	170916	371913	407692	145635	512143	479040	133197	385297	455350	5576.67	329543	451197	411698	306513	223393	422368	453144	480776	277264	446308
A0A0A0MS14	5861.72	3252.49	2157.02	4654.6	9876.08			2167.99	7302.02	2149.9	23450	6580.36	7475.9	3164.05	2319.76	5060.13	1727.76	2569.97			7996.74	8558.4	13392.9	12662.2	13940.7		9173.52	7753.31		8865.95	5703.92	8863.95	10249	4833.51	11839	5819.51	9274.03	8558.77	8003.58
A0A0A0MS15	56072.2	38810.9	42012.7	35838.9	67352.9	35168.6	37927	25968.2	53018.2	29701.4	44765.9	39765.4	70661.8	46705.3	29223.4	49807.4	30546.9	30750.5	24929.1	46677.3	62507.3	55473.1	25511	73850.9	70815.2	29854.2	59457.7	96805.3	105.998	65100.5	59993.4	43244	93414.9	43147	45975.6	32595.3	38234.1	28501.3	60175.8
A0A0A0MS15	43319.4	16703.1	7211.05	11542.1	51021.4	12072.1	48786.4	7611.06	9287.08	6464.05	19325.2	32741.3	43272.3	13281.1	9304.08	13194.1	10154.1	10669.1	6307.05	9694.08	57771.5	59635.5	7919.07	44822.4	54707.5	6421.06	49811.4	58871.4	4402.03	53061.5	62052.6	35123.3	79196.6	36562.3	54052.5	40698.3	40501.4	45348.4	49379.4
A0A0A0MT36		2539.02		1223.01	4465.03	1701.01	2737.02	3433.03	1677.01	1606.01	1984.01	5337.04	5188.04	4773.03	4487.03	5226.04		2319.02	5197.04	2175.02	1976.01	12677.1	4112.03	9991.07	9238.07	708.005	4249.03	13820.1	766.006	8008.06	2610.02		2498.02	4522.04	8104.07	13400.1	4979.04	2878.02
A0A0A0MT89	24059.1	12070.1	17649.1	11115.1	21131.1	17289.1	17954.1	12336.1	10119.1	13650.1	15660.1	17306.1	21079.1	17223.1	10212.1	10810.1	5094.03	11637.1	7486.03	12699.1	22573.1	18927.1	18885.1	14846.1	42898.2	7929.04	25639.1	62630.4		19835.1	18193.1	39395.2	28994.2	16652.1	27562.2	17163.1	25738.1	32118.2	19692.1
A0A0B4J1U3	9484.12	12949.2	5290.05	5983.06	12064.2		4119.04	6830.08	3952.05	1953.02	13579.1	8825.11	11252.1	5978.08	8194.09	2410.03	12792.2	8264.1	1624.02	5295.07	6192.07	7703.09	5491.06	4329.05	4633.05	5271.07	6647.08	5986.08		5400.06	2460.03	690.008	16182.2	1091.01	4641.06	934.01	1366.01		5123.06
A0A0B4J1U7	104972	69080.1	79944.6	34181.3	105638	36537.6	91818.5	54545.3	56631.9	45110.3	177742	137406	206666	81252.4	63445.2	75892.5	78163.6	52604.3	64672.6	96185.7	95235.7	97113.3	63834.8	116667	218586	37358.4	116636	118429	40909.6	119623	134648	81388.9	95404.4	100176	169786	93780.7	138404	165577	160655
A0A0B4J1V0	16320.2	16139.8	27920.5	10144.1	22394.6	8760.05	12699.9	9194.18	8901.79	9344.87	21263	13826.7	22983.8	13428.7	10624.6	10941	11661.8	7530.66	10838.5	19159.7	15940.1	16691.6	5769.37	16099.3	16881.8	7717.69	14268	17079.4	9932.5	23190.5	16930.8	7078.3	12918.3	8636.95	18069.4	10076.3	16183.7	10600.9	11994.2
A0A0B4J1V0	409530	410627	516226	257450	628326	351712	416777	338588	382635	365736	540706	471049	574019	456713	337425	317543	327952	339209	255083	392036	461345	444301	380606	461724	531865	324370	491479	667864	3509.02	664094	493835	368376	555262	328825	435330	385906	608602	493816	412551
A0A0B4J1V2	3028.9	1969.39	2440.34	2352.83	2668.97	1232.49	2307.21	1770.68	1941.31	929.189	2128.2	1408.8	2631.91	2428.2	3035.26	2346.16	2487.36	2985.26	2127.18	2424.78	2076.8	3038.01	3608.23	6022.4	4314.81	2140.07	3035.93	3785.93	253.849	1888.72	3289.74	2382.9	2956.97	1464.27	4033.42	1910.39	2540.77	1519.72	3828.88
A0A0B4J1X5	45519.1	43263.7	61462.5	58822.3	66888	48341.5	49775.6	32558.2	28646.4	32349.1	52763.5	59024.9	49822.4	41643	54053.6	54901.6	59501	43782.8	37975.9	33156.1	57549	81186.1	38489.6	53837.4	82659.2	31715.6	43004.4	87058.1		40729.6	73833.1	50553.6	51700.6	31906.4	50835.2	55835.1	46712.1	34195.5	47938.5
A0A0B4J1X5	1446.01		620.004	1329.01	1095.01		1086.01		1810.01	906.007	2410.02	1669.01	1801.01	945.006	1189.01	3723.03	1993.01	1854.01	3152.02	1027.01	1424.01	1935.01	4177.03	969.007	1294.01		1255.01	706.005		925.007	1376.01				1279.01		546.004
A0A0B4J1X5			161170		583631	139891	454439				204581		378823		162859	191363		162508	139046		482196		125218		509247	109994	486377	603692	58775.5	537788	564771	525549	588933	383551	556435	487771	535556		586369
A0A0B4J1X8	21729.2	31926.3	36611.4	20331.2	32628.3	14439.1	18563.2	21561.2	19877.2	14770.1	51618.4	17820.1	37514.3	28669.2	25027.2	37936.3	15836.1	19435.2	22836.2	44001.4	45875.4	35780.3	29488.3	32552.3	42074.4	19085.2	34957.3	38268.3		39782.4	28006.2	14914.1	28666.2	29219.3	36457.3	12034.1	22028.2	26244.2	39135.3
A0A0B4J1Y8	39032.7	9964.17	15554	31804.1	34329.6	24152.2	22876.6	5402.43	15805.5	52167	19257.4	35949.1	27354.9	18240.4	14664.3	21499.1	33493.3	19745.6	14140.1	20744.3	24492.3		20749.3	13173.6	31574.6	6624.84	23290.2	53345.5	11171.4	17233.6	23085.2	25087.4	27237.8	10924.9	12888.2	10415	8932.98	26720.6	9016.42
A0A0B4J1Y9	17527.7	22175.3	23840.2	16944.6	27860.2	10316.5	16771.9	9197.99	14007.8	8257.52	73862.3	15911.7	19889.6	17327.4	16575.3	11804	13810.1	17447.6	10392	15302.8	21231.4	13547.5	18896.5		30840.7	11567.5	26263.1	32782.7	3051.23	20188.4	20934.5	17933.3	26336.9	15286.5	22921.7	29727.6	47594.9	20584.8	28097.8
A0A0B4J2D9	1224.33	2151.25			1370.98		1967.8	1118.82	2053.15	1500.13	1445.89	1887.65		1139.07		1150.09		948.088	1167.14	1418.72	2608.93	1477.09	1239.68		2835.5			1455.28		1336.87			2337.49	2232.02	5027.01	1318.12	983.898	1400.87	1705.2
A0A0C4DH24	2374.4	1150.7	1738.67	1657.99	2611.78		2750.3	589.094	1201.11		792.176	2801.18	3597.23		1447.87	1009.93	1579.7	1181.98	3462.47	1856.75	2144.01	4453.09		3038.03	3552.64		1895.95	6423.8		2153.31	2357.92	2550.04	2181.23	826.281	4775.48	1374.13	2422.05	1923.34	3323.48
A0A0C4DH25	96782.6	79389.6	64810.4	45115.3	103432	70413.5	95429.6	73043.5	50914.3	43606.3	118961	92572.6	107689	111212	87133.6	63502.5	50440.3	76052.5	44683.3	37063.2	101388	124406	58210.4	136152	182492	65986.4	125224	160002		144304	158656	131481	146010	81970.6	172211	141938	114132	155941	170628
A0A0C4DH25	8986.27	13396.3	12360.8	5058.59	12936.9	1531.88	13553.9	7631.38	7537.38	3229.74	27385.7	15598.3	15868.8	6274.49	10306.2	4831.61	11838	17894.8	1917.84	9784.2	11713.1	12539	11988.8	12978.5	16326.7	8567.31	10230.1	15801.7	1073.91	8439.31	8833.28	6382.49	17416.6	3086.47	17083.6	6060.51	12465	1122.91	8805.28
A0A0C4DH29	6030.06	2004.02	3260.03	3090.03		2204.02	1274.01	1602.01	1309.01	1322.01	7163.07	3945.04	5316.05	11749.1	4363.04	4211.04	6150.06	5061.05	3915.04	6058.06	3179.03	6594.06	4144.04	3479.04	7262.07	3192.03	7171.07	6327.07		8544.09	6111.06	4727.04	3521.04	2986.03	8055.08	3130.03	7131.07	1001.01	3614.04
A0A0C4DH29	486344	197233		154229	602458			136739	124939	108785		410236		160326			149840	163744		93916.8		572593		630858								523064			36371.3			624524
A0A0C4DH31	2300.54	1976.54	2130.8	1289.13	2538.94	254.025	1417.86	1015.46	890.086	422.041	3086.82	1750.42	2439.56	1124.11	882.439	1131.15	1302.63	2016.74	651.065	1475.14	1797.48	1583.15	1979.73	2103.46	4068.45	616.06	2347.7	1865.14	81.0081	1401.14	1882.37	962.093	3570.81	665.241	3024.89	1046.1	1934.94		1381.93
A0A0C4DH31	43026.3	20438.2	8106.07	20284.2	91670.8	20747.2	57014.5	14096.1	10026.1	15642.1	17579.1	49535.4	34748.2	16374.1	10660.1	15502.1	12565.1	14482.1	11192.1	9763.08	48208.4	63743.5	13824.1	74776.7	64983.5	8554.07	52019.5	69615.6	6453.04	50762.3	44835.3	43409.4	69002.6	32441.3	48358.4	45144.4	42985.3	82209.7	50584.4
A0A0C4DH34	14600.1	30105.2	14737.1	16080.1	28615.2	28039.1	14282.1	19344.1	21440.1	28452.2	23126.1	17371.1	26438.1	26570.2	38650.2	14138.1	18207.1	31522.2	13720.1	24528.1	28767.2	10833.1	16389.1	21302.1	35455.2	11967.1	20398.1	23592.1	9620.05	26726.1	20665.1	20345.1	28058.2	21446.1	31819.2	15789.1	18674.1	28121.1	18196.1
A0A0C4DH35	55206.8	35061.9	33883.4	28527	76878.6	22713.7	45189.5	29993.4	19510.2	12027	42937.7	51792.2	62993.3	34746	27172.4	24766.9	24836.4	33342.1	13340.7	20750.5	63151.9	68809.8	20230.2	93797.8	79521.6	21072.2	58218.9	129134	6506.49	70015.4	65308.1	43796.4	57880.4	49182.4	110869	47151.5	80706.5	61224.4	49069.8
A0A0C4DH36	7407.07	13075.1	8530.08	7679.07	8708.08	4400.04	10192.1	4314.04	11662.1	7201.07	18075.2	9808.09	16275.2	15943.1	10687.1	6094.06	10221.1	9256.08	7408.06	10523.1	9064.07	7001.06	7634.07	6183.06	10936.1	2272.02	9235.08	15869.1		11104.1	5778.05	8674.08	11979.1	5288.05	27896.3	8895.08	10470.1	5245.05	7275.07
A0A0C4DH38	18741.9	9067.16	7829.64	13345.8	14300.1	6874.53	6196.45	8542.23	6393.43	1648.62	11783	20622.6	14015.7	14389.1	8021.88	7674.96	10988.1	11622.2	8911.43	9668.22	16600.1	21260.2	6392.61	27323.8	36131.6	5210.53	18087.8	21506.2		13970.7	9227.49	9061.38	12427.2	15139.8	17440.7	10634.9	13357	15890.5	15791.4
A0A0C4DH43	49842.9	34162.2	65989	76820.9	87439	76028.5	17949.2	1071.58	47317.8	1974.67		46546.3	56946	51638	2865.78	70585.2	79173.1	1934.39	45896.6		41011.4	45770.1	52743.2	2106.72	1933.48	51839.7	64770.4	126030	1410.88	47857.3	2134.8	2958.6	57399.9	38622.3	56705.3	48772.8		6817.79	49029.2
A0A0C4DH67	1500.02	1856.02	1920.02	1050.01	1846.02			1644.02	1564.02		2347.02	1997.02	1473.02	3356.04	2166.02	2074.02	1947.02	2795.02	930.011	1266.01	3956.04	4046.04		3257.03	3625.04	1872.02	2057.02	3692.04		1830.02	4840.05	2288.02	3451.03	3624.04	3887.04	2724.03	3882.04	773.009	4396.04
A0A0J9YX35	15519.2	11197.7	11751.5	5555.64	26766.8	7621.98	29143.9	5654.7	8813.47	3679.11	16286.8	21914.5	30074.9	15348.2	9204	8657.05	11209.8	12878.3	8920.72	9812.43	12483.9	17675.9	8041.67	21069.8	37233.4	3448.09	16438.1	25444.9	1051.22	23719.5	13783.3	8704.11	17867.7	16320.5	27891.5	14213	23189.6	11666.6	23330.5
A0A1W2PQ73		38632.2	25116.1	21260.1	15949.1	5011.03	1268760	34172.2	27163.2	6204.03	20114.1	10613	13510.1	12606.1	42419.2	21812.1	13687.1	16409.1	31665.2	38959.2	3366.02	8063.05	16028.1	8227.05	12989.1	16618.1	18354.1	12541.1	78306.5	13707.1	7195.03	10405.1	25273.1	13582.1	31190.1	10707.1	919229	10742.1	11468.1
A0M8Q6	1078680	970714	906832	837423	847322	1140850	979574	1232680	784290	552570	1407740	1095960	1819930	1086610	1268350	1316390	1007490	1139730	1826700	1047140	332135	996199	1126760	1199760	886308	780746	650202	1406440	824548	855161	1440320	705882	1359860	633048	1083730	1327560	1156610	1169810	518941
A0M8Q6	6629.06		3173.03	8041.08	7737.08	2014.02	6602.06	2700.02		4157.04	9339.08	4776.04	9539.08	3359.04	3834.03	6975.06	8708.08	5797.05	4637.04	6672.05	2463.02	5458.06	8629.09	6881.07		3310.04	3576.03			4365.04	6428.06			3024.03	7142.07		380681	2325.02	7368.08
A0M8Q6	549467	562347	1001420	356364	502130	274309	268571	66241.1	694202	215868	971963	265708	1149730	665237	100647	962499	62206.9	391617	429054	166414	658675	276436	203594	275762	818735	617002	555617	846410	4532.54	905325	1153790	63458.9	976953	431440	1171010	1142100	927487	70462.1	746690
A0M8Q6	46594.3	49277.3	50816.4	27169.2	32129.2	44672.3	49342.3	30819.2	43437.2	43422.2	47406.3	16351.1	56776.4	44849.3	48426.3	77879.5	31475.2	35179.2	23713.2	33917.2	59341.4	17366.1	45458.3	22937.1	55858.4	34726.2	45905.3	75238.5		81159.5	78848.4	72218.4	53979.3	53701.3	60522.4	89870.6	64178.4	86939.4	68601.4
A0M8Q6	3024.03	1167.01			1273.01		1203.01	2351.03				2553.03	1448.02			3325.04	951.01	1322.01	3166.04		727.008	4482.05	9007.11	4836.05	2215.02		1458.01	4815.05	2289.03		933.011	5970.07	2847.03			1284.01	1477.02	2464.03	1049.01
A2NJV5	10348.4	3753.81	7090.9	2235.69	5112.65	2425.27	3852.88	2383.8	2856.33	2384.93	4680.17	3128.18	4783.04	2941.85	4627.53	5805.77		3691.66	3291.07			9130.91	6857.57	5791.09	6046.43	1282.25	9338.99	10704		14579.8			6062.26	3575.84	10008	3247.3	3376.03		6022.05
A5A3E0	11560.3	21518.2	16315	10973.6	17195.7	7971.03	17918.8	7267.22	8532.31	6753.19	18955	9196.34	11473.1	16999	7006.38	12432.8	9710.75	12078.1	10548.2	19669.4	7558.71	26772.7	11551.5	12063.7	10225.8	9151.81	15555.9	14996.8	1478.91	9511.12	5839.38	6668.5	10637.9	6904.46	16892.7	9376.71	9623.41	13125.6	10605.2
B9A064	465671	570316	424962	525291	663907	708079	709911	389585	501960	575490	576806	492234	776466	589946	510108	677876	489131	548348	483586	547059	656468	501020	676417	753747	880988	372196	569275	784235	602536	733802	655651	622279	629120	558839	700786	747329	548450	728636	594530
B9A064	286821	129107	138205	126184	352341	155909	391165	129347	102691	83882.7	166098	197283	280228	136052	120871	146021	67361.6	84116.5	119479	101486	332560	272287	107087	316874	292589	87582.3	279318	363773	239719	449722	451801	470380	325510	285083	286918	498113	355859	505523	405102
O00142	5274.02	4429.02	3819.02	6507.03	6703.04	7304.04	7078.04	2771.01	7806.04	3779.02	12438.1	5254.03	7779.04	6769.04	4435.02	8629.05	4734.02	4580.02	5866.03	5866.04	4036.02	6970.04	7231.04	7597.04	10382	5457.03	5689.03	6297.03	1692.01	6226.04	7511.04	4341.02	7622.04	4359.02	7441.04	8541.04	6985.04	8002.05	3796.02
O00187	11507.2	8364.01	8432.14	8929.32	13940.5	7084.18	12159.3	6225.68	4414.45	5435.41	6884.15	7725.42	10182.2	7965.78	7371.37	6203.52	6334.1	6828.16	7703.55	5888.45	6077.65	12330.2	11180.3	9741.73	7864.35	6493.58	9230.67	7624.95	1210.01	5182.18	9041.65	6627.32	12254.8	6083.62	9003	7963.85	7184.29	3567.88	10717.6
O00391	5395.35	4988.78	5393.03	5749.47	6813.66	3961.1	6208.18	3696.83	6996.46	3681.03	6323.4	4902.66	5714.76	4490.83	4207.93	5694.24	5080.51	5193.8	3939.38	5508.37	4083.72	6140.1	6318.36	5365.07	6366.19	6147.02	5500.17	5142	2121.45	4639.42	4295	3526.23	5859.33	4205.24	6283.84	4929.35	4437.9	3374.23	4614.46
O00533	5599.24	4456.87	8914.1	5462.32	4297.14	3519.95	4437.96	4508.69	4280.17	3293.92	6473.88	4843.48	6521.69	5391.32	4786.26	5347.58	4960.52	4255.96	4567.69	5816.55	4230.16	3330.73	5565.51	5060.53	4760.76	6692.62	4876.79	5841.12	328.65	4649.71	7821.84	5539.83	5796.12	4741.84	6221.67	5670.27	5153.14	3178.71	4256.05
O14786	719.005	789.007	1366.01		1462.01	982.008	1686.01	1003.01	2225.02	587.006	1281.01	553.005	800.007	1302.01	1016.01	1494.01	586.004	854.006	1164.01	878.007	623.006	1323.01		872.008	897.008	2002.02	1627.01	1790.01		1119.01	1267.01	686.005	1034.01	1167.01		1688.02	2010.02	1117.01	792.007
O14791	102982	102362	161991	121783	73026.2	55178.5	87348.9	71240.9	48004.9	59631.3	90150.9	71130.7	93795.7	72192.3	112284	95080.6	70256.3	128823	55646.3	87005.5	77478.4	72272.3	104264	90845.6	90689.7	67000.2	98124.2	102450	36070.1	63536.6	62722.5	69628.6	96956.3	90628.7	95300.7	52351.8	67280.5	80502.8	107787
O43707	9993.07	8609.2	10182.1	9796.07	20983.2	5561.04	8275.07		10187.1	8218.07	12839.1		16195.1	10413.1	12726.1	6084.05	7504.06	13220.1	9772.07	13504.9	11008.1		11812.1	14465.1	16876.1	7382.55	12069.1	11159.1		13822.1	5265.04		19016.2	10037.1	15384.1	7874.06	11854.1		14433.1
O43790	41753.8	37606.4	42343.9	46906.6	44130	37699	51695.1	39634.2	45419.2	28768.1	40854.3	42506.1	42648	37803.5	34589.4	46041.3	43670	38438.7	43936.6	36423	40292.5	37764.6	40569	42224.5	36846.3	48541.3	43602.3	40512.9		49155.4	42177.2	42539.7	42635	44838.1	33278.6	42731.3	39243.7	31277.1	52460.3
O43866	190525	74543.6	235865	83648.1	128355	77961.1	129809	75487.8	65416.8	65270.6	59736.3	136142	165914	89743.1	111935	57722.8	122724	69434.3	86377.3	168572	72987.1	187886	50377	119982	128125	99105.5	94214	158419	36024.1	85667.4	59775.3	55385.2	163445	68342.9	208939	58976.7	102263	121995	103540
O75015	1710.02	1181.01	1793.02		1985.02		2473.03		3135.03	1083.01		1129.01	1566.02	1182.01	982.011	1369.02	1593.02		729.008	2921.03		492.006				1449.02	2463.03	2049.02				841.009	1625.02		1534.02	597.007	1833.02		622.007
O75015	9488.33	5073.7	6310.16	5639.17	13443.6	8784.2	8885.04	6922.27	7690.39	7519.93	8206.33	8431.16	12084.8	9545.72	7153.48	8118.64	7171.17	4935.02	5265.29	11003	6901.66	6636.23	6294.23	8587.09	8884.3	9965.21	8985.73	7858.31		4980.06	5442.25	5553.22	7570.39	4383.2	9024.66	5668.21	8663.52	11830.7	7107.68
O75636	50385.7	62079.2	57057.5	78773	44856.1	61216.5	80117.9	51928.7	33445.2	58365.7	41899.2	59497.8	74400.3	42302.4	45905	43638.5	49444.5	57052.4	79363.9	58478.6	51409.8	95410.7	106343	81590.1	50764.5	58035.9	56633.1	72862.4	3103.93	56708.6	52305.9	46391.7	60688.3	50072.7	46305.8	35848.2	56238.7	28928.2	78162.1
O75882	36661.7	29428.3	40305.9	36966.5	41306	20950.8	32111.2	24418.1	24348.7	26716	34943.7	28795.2	40484.5	29768.8	31720.2	27972.6	23753.1	30885	29360.6	41845.2	35632.3	20387.2	36198.2	33007.6	40731.1	24648.4	39711.1	38402.1	3004.23	32107.9	27895.5	21706.8	48224	36890.7	42144.8	27458.6	34481.8	23588.4	48090.3
O76013	17630.1	3990.02	4952.03	12516.1	7844.04	92762.5	5418.03	3354.02	7444.05	9803.06	10438.1	6715.03	8152.04	4600.02	38132.2	11144.1	5645.03	4828.02	5644.03	439425	6450.04	111725	5297.02	7710.04	6300.03	26605.2	53276.3	4555.03		6769.04		12856.1	24320.1	19485.1	13271.1	17153.1	6080.03	28940.2	6023.03
O95445	116473	105014	154180	115999	57588.3	63006.6	94454	90689.7	65951.5	74566	135162	92999.8	111210	119751	130522	93621.7	100877	139690	113089	123956	108831	79439.5	133583	125783	97373.3	117446	102244	95446.3	12131	89108.2	100907	87041.1	143345	95357.1	123205	94123.3	76529.9	102198	134263
O95497	1614.97	4521.36	4144.96	1800.24	4373.81	1129.96	4632.99	1275.55	4497.95		2255.91	779.249	1033.5	2539.74	4173.73	4095.36	927.591	1039.3	2479.91	5031.66	870.315		1347.89	1970.56	7575.01	1611.61	1977.59	1943.05	361.696	2045.83		1613.95	4297.74	2242.27				2522.72	1838.7
P00338	1469.32	4992.45	1372.96	1787.35	1934.33	2165.33	2410.51	1309.92	1200.91		2070.76	1552.37	1403.36	2251.29	1135.57	1978.26	1148.44	1514.97	897.959	5264.74	1278.04	4212.17	1393.5	3155.27	2138.47	3733.41	2277.95	1286.44	707.693	1781.8	923.831	1170.22	2011.28	1325.65	2305.13		859.348	2433.5	1497.13
P00338	2330.02	1990.02	1913.02	3205.03	3533.03	2321.02	2979.02	1969.01	3108.03	2340.02	3067.02	1835.01	4442.03	3173.03	2052.02	3334.03	1654.01		1995.02	3523.03	2287.02	7972.06	3423.03	3204.03	2715.02		3164.02	1422.01	515.003	2803.02	3118.02	3260.03	3953.03	2828.02	5190.04	3155.02	2426.02	3830.03	2523.02
P00390	1579.81	1167.41	1131.94	1519.56	2058.58	1319.8	2024.72	1060.7	1770.45	651.335	1455.37	1085.97	1834.84	1152.66	951.845	1271.57	1433.31	1288.6	1164.98	1397.52	1249.1	4087.62	1492.44	1484.07	2054.76	2113.83	2418.13	1880.34		1610.07	1519.81	1475.83	1905.15	2008.87	2348.44	1800.5	1160.56	2306	1326.99
P00450	403336	391930	712697	504358	721712	386356	446322	417925	583610	257857	744567	511198	699007	464307	459820	481500	522771	570231	462286	499257	394560	308127	562611	480045	270755	463119	535657	443931	28294.9	398885	462558	394731	526347	403464	578594	353679	349964	259753	412115
P00488	2607.21	1688.63	2262.32	3137.45	2048.26	1842	2296.77	2779.61	1951.74	1510.25	2522.11	2760.15	3315.41	4164.91	1787.55	1635.03	2015.93	1809.64	1374.62	3165.48	1887.08	3764.56	2263.31	2540.95	2836.57	1851.33	2596.21	2843.51		1174.26	1645.37	1598.1	1901.74	1306.91	1526.72	1374.5	1059.89	1677.77	1749.27
P00558		1696.68	847.602	518.624	1666.82			336.718	940.489	269.633	699.339	662.629								1498.8	172.524	1171.42		1405.49	1806.15	1131.19			999.927		685.047		1106.91	899.205	749.486	1069.5
P00734	237835	252039	319848	331258	249765	171049	225469	217950	209245	180014	295969	240851	332917	242454	289472	247396	299546	291860	264315	300510	246467	181435	367029	280306	274347	237415	238307	255214	3502.48	227015	185185	213189	324342	270431	349702	205134	213121	104127	308644
P00736	73499.6	89658.4	122568	98061	98098.4	68156.1	97306	73377.3	76450.2	63437	125111	70431.1	94267.1	77227.9	82957.5	80468.4	87229.1	102476	76568.8	100027	75295.2	77839.1	108175	60607.6	91641	80307.1	90485.6	70782.8	17828.7	78760	67253.8	55270	107818	74516.3	124075	64749.2	75187.5	46081.8	69730.8
P00736	38590.2	77068.4		82199.4	48256.2	58213.3	55540.3	41778.2	55555.3	57583.3	97572.5	40909.2	51770.3	55143.3	57238.3	72191.4	54588.3	83408.4	56479.3	68361.3	51039.2	39880.2	80356.4	29418.2	36431.2	67556.3	57493.3	45080.2	7841.03	59218.3	52527.2	35635.2		55087.3	60212.3	52542.3	48072.3	27470.1	38716.2
P00738	3228000	2182670	4065590	3095460	3966850	2458680	2383100	1651920	760273	1534400	2877570	3089550	4216990	1400140	2863730	1376970	1782810	3063470	3275450	1434240	1517130	1615230	2975600	2878300	1527030	1824330	2534770	2588280	527871	3429890	3234850	1932290	3829190	902579	3630210	2486840	1742290	1601680	2068870
P00738	2036440	1121610	2086750	1739520	2395070	1681940	1634880	1066140	401975	753607	769308	1859500	2218680	792909	1491180	669528	1105530	754991	1608120	801307	983936	1092830	1560980	2194560	1193750	1009840	1684050	1556270	197691	2213460	2067160	1325420	2519360	692967	2265240	1612690	1121540	1104880	1475230
P00739	94623.9	80338.2	181500	68085.4	47449.9	19527.7	64519.2	62028.3	17146.3	35152.8	93591.3	51728.8	97013.4	41572.7	63910.3	71903.7	33388	124513	53068	44885.6	36883.7	45062.7	71527.3	42415.6	46103.6	42212	80970.8	77622.6	19914.4	51342.9	65773.4	36202.4	63107.1	42154.9	87952.7	40506.4	51775.6	40991.2	68049.3
P00740	35456.3	32210.5	40584.7	48763.4	34559	30555.9	36361.8	26544.1	26491.7	24753.5	42849.9	27705.4	40290.5	26698	32109.2	30802.7	27992.5	37028.2	31085.4	39111.9	22865.2	23786.9	40983.9	44400.3	34702.5	23787.2	38763.1	31691.7	19772.6	26364.4	22215.1	22138.7	46289.6	33662.9	41950.3	21679.9	25903.4	19654.6	39419
P00742	54065.7	44949.4	71449.3	67639.8	43766.1	37102.9	47938.1	35041.5	35884.8	31149.7	65585.6	46048	54012.9	39039.5	53327.3	38193.9	47075.3	62713.1	49115.2	71465.8	42811.1	35533.9	60786.3	52972.4	54820.2	39555.1	42538.7	51121.8	13412.1	44205.2	32034.4	41916.7	52803.2	41961.1	56257.7	34729.8	41341.6	22093.7	58366.6
P00746	5538.68	5609.01	4825.37	4870.07	6874.13	3143.59	8924.83	4039.75	5693.87	2862.64	5193.31	4882.41	6643.84	5401.07	5393.76	4768.29	4369.35	4976.17	3873.57	4446.13	3448.11	4572.02	4894.59	5789.09	9629.1	3312.85	6181.59	3567.37		4957.64	4680.89	3409.45	7289.26	3840.06	6617.14	5618.32	4850.81	2593.66	3844.81
P00747	347487	391072	492832	483359	353002	311611	360173	353718	309180	289207	384386	365240	463395	331033	382477	371432	349986	450473	324366	416661	349181	261332	445244	369388	326990	318940	332839	341134	24354.5	305424	247032	294258	432429	362383	428163	276790	271659	207116	402274
P00747	31482.5	31136.8	46506.1	36914.1	23322.8	7458.99	34772.9	24623.2	25318.8	16016.7	31292	28159.8	44461.1	27553.5	28762	26118.1	34117.3	48028.9	18154.3	36164.8	31182.9	14903.8	39563	28722.3	28485.5	23516.9	31403.1	36062	362.771	22088.5	13521.5	18545.9	40417.1	15778.4	36717	16437	19005.5	934.409	32589.5
P00748	107052	139209	170763	197970	164478	119208	73623.6	65194.8	56236.1	54931.1	146200	68169.7	85699.6	65462.8	140492	114156	132690	121324	73194.7	89397	115145	64226.4	96934.9	116316	120631	122727	104643	125373	22154.7	143921	51553.4	95076.5	84540.2	133035	155308	134636	93005.7	33189.1	157022
P00751	441417	469498	715209	546107	882728	432792	439406	434935	534473	345793	600180	516238	656659	385511	478425	462218	488141	648077	431083	425142	380447	277362	522569	537998	461415	448034	453160	460892	86451.1	334159	382590	290868	502501	460232	500726	328027	314275	257690	460186
P00915	3872.51	14237.1	8134.35	5180.81	8505.65	15535.5	12065.5	5663.34	6614.03	8327.34	6492.33	7981.26	10651.1	14272.6	7353.89	9501.79	8599.45	5257.8	7540.68	10253.2	10772.6	49869.9	13983.1	6383.13	15571.3	6256.15	6610.98	4902.33	2370.08	4993.71	14083.9	7000.47	31265.7	11683.2	9519.83	9335.44	17583.8	6193.82	11688.4
P00918	1983.81	3311.19	2689.24	2406.75	3698.08	4980.23	3770.11	1124.71	518.61	2025.69	1764.64	2211.72	3018.22	3323.2	2496.25	2800.93	3071.9	1493.87	2029.74	3922.45	3183.02	15448.8	4854.39	2920.8	4922.38	1683.78	2697.45	1691.48		2103.72	3972.37	3338.03	9222.72	3784.47	3511.31	3796.13	4751.75	3505.36	4623.41
P01008	215544	141918	268839	207094	265223	215587	196091	159278	236385	122492	254471	236255	324369	190355	222367	163878	162719	174795	189182	268338	206221	216078	248385	222415	216605	220494	260984	188736	2186.6	198009	222717	177041	214377	192877	309553	182927	184734	160446	229743
P01009	778839	992493	1393010	1084110	1689020	864323	834247	811520	1326540	810234	1388730	1192870	1530010	975064	1063560	862361	991573	1220880	1005360	1074010	660489	869130	1245500	918475	1065460	1071530	1133170	924805	165573	1085320	825561	756063	961716	942529	1510000	990377	830949	686432	717141
P01011	661146	803422	1167570	804967	1729160	749814	631702	617415	693841	426806	953953	797584	1080280	709984	736418	644358	842802	921730	741146	862883	610473	710739	873479	968661	720214	581734	793021	659375	56778.9	641354	564139	512780	805127	347479	936178	612079	565948	241109	666780
P01019	276742	281572	370230	343041	277640	130152	314272	217274	223920	133055	255978	249748	353618	261797	317607	223887	244795	308516	182863	384453	270448	254456	407444	336005	330216	183117	355976	292405	2695.46	256176	201116	177360	461295	316240	388889	198667	240866	132673	319307
P01023	1116280	1057490	1274130	959757	1711930	1765930	1033450	1132660	1068800	732357	1688500	1367300	1657010	2076870	954741	1058730	1468760	1152940	1170320	1637630	1404920	1445300	1387780	1512940	1874910	1389100	1312250	965394	85176.4	1411120	1044480	1060190	1327740	1102640	1635600	1402840	1419830	901071	904658
P01023	773358	699330	976420	633359	1289280	1510270	614159	777132	724818	608334	1148800	927274	1191200	1880060	682873	856333	964629	782673	978313	1298450	1069550	1157930	985841	1161710	1469400	1051490	1009740	722641	54162	1294120	884244	1000280	903539	993128	1232820	1144220	1262200	738792	701263
P01024	1339210	1332450	1818400	1315210	1969440	1184100	1439040	1126270	1424110	1123270	1755000	1454460	1977480	1138350	1421790	1102250	1087100	1671080	1189640	1617350	1278230	1099880	1631570	1575430	1513100	1155280	1386060	1488240	53881.3	1333790	998560	1196150	1828870	1357170	1784610	1123650	1254500	646025	1668850
P01031	126886	162801	208717	199478	195859	160987	151566	144450	156056	123363	161730	114755	149357	133507	134909	147796	147336	206897	138419	179786	130919	110152	191092	183433	149208	143400	162309	132641	33131.8	142007	148004	137208	178180	148634	191420	113138	113348	77357.6	156359
P01033	3798.03	3095.02	4650.04	3531.03	7293.06	2645.02	4633.04	2283.02	3342.03	2030.02	4958.04	5118.04	5445.05	3664.03	2290.02	4120.04	3507.03	4133.04	3623.03	3176.03	3274.03	4580.04	3248.03	4749.04	4833.04	3439.03	4133.03	3033.03		4007.03	3176.03	2585.02	4144.03	2830.02	5856.05	2677.02	3654.03	3811.03	4310.03
P01034	5836.17	9981.16	9209.15	7696.44	6862.36	5183.1	7840.92	6863.13	7580.52	5101.81	13259.3	5675.46	7868.45	7131.54	7303.93	5857.88	6229.72	7119.15	6550.59	11095.2	4049.41	4309.73	8358.25	5214.29	11696.9	6767	5909.27	5917.65		5006.23	3233.61	4157.53	7804.14	4055.03	9676.44	5338.29	5502.14	3483.52	3554.6
P01042	548119	463219	512005	574024	737545	426030	460745	397765	427623	253429	549881	410866	494163	355211	482033	350192	380242	439195	400525	446405	367110	408458	491942	426512	449773	345765	446599	401304	121254	351703	317812	304713	526998	403639	510109	309961	358335	237429	470290
P01344	13093.2	10050	11066.4	15033.3	10055.2	4803.15	13184.7	10515.8	10412	8934.31	12584.6	11423	10005.6	13006.3	11244.3	12522.7	11565.7	14561.4	12898.6	11929.3	12673.5	12765.9	9604.63	10924.6	8970.35	9152.5	15350.6	13155		12620.4	6879.01	9431.78	16111.5	10893	15619.4	9151.93	8015.41	7917.46	17315.9
P01591	495994	480747	818547	333136	510457	416155	546137	382348	343230	370561	309373	428703	549033	357065	542620	318980	499173	314786	548949	706735	414672	595325	290104	415917	559702	380745	330553	384961	15013.1	356082	327775	183723	574985	301562	690491	498499	498855	365834	338916
P01593	15000.2	12584.1	8897.09	9615.09	18247.2	2058.02	20926.2	9321.1	11351.1	3874.04	18693.2	21435.2	26440.3	13964.1	6748.06	5246.05	9166.1	10443.1	6119.06	12108.1	20182.2	20283.2	11980.1	28397.3	26574.3	13474.1	25757.3	30872.3		17234.2	16121.2	14955.2	24071.3	10164.1	30118.3	13482.2	20072.2	931.01	16443.2
P01597	6949.22	4998.15	4342.71	3291.6	8231.6	2473.11	11318	4023.43	3105.73	2262.07	7779.19	7167.4	10954.1	5749.9	3461.1	3175.66	3720.45	4946.72	2489.47	5101.93	13231.9	7197.11	5030.76	10561	14541.1	3453.36	12228.6	16537.4	426.767	7843.95	9925.89	8216.14	9511.3	4799.14	18804	6660.29	8865.03	1421.37	8544.04
P01599	27770.9	33294.3	18734.7	18759	31230.8	15732.2	17493.5	14541.3	15668.7	16979.9	26669.5	25391	14789.4	23083.4	17934.2	7149.52	16978.4	14526.1	14374.1	14723.5	31059.5	18250	4090.7	26460.5	23523.8	14765.8	25720.3	25458.4	245.646	18990.6	23999.8	25492.1	20132.3	14783	14467.8	17305.5	20080.5	24435.7	28102
P01601	3601.04	4097.04	2335.02	2351.03	5814.06	1874.02	7834.07	2306.02	3038.03	3158.03	5626.06	7112.08	7459.08	3054.03	2389.03	3024.03	3123.03	3431.03	2177.02		4688.04	5673.06	4488.05	6171.06	9802.11	2560.03	5879.07	9570.09		4769.05	4985.05	7480.08	7271.07	3138.03	8516.09	4485.05	8631.09	2732.03	6411.08
P01602	129571	83525.1	70759.3	51669	107519	27555.7	147424	62694.7	55690.9	43142.8	80459.4	123871	177065	113019	77745.8	67527.3	87686.6	77506.2	28153.4	77471.5	133867	157093	75424.3	133047	231043	42471.2	164252	176913	52383.5	98638	181781	149890	175516	69367	214926	104186	161649	148867	152326
P01619	173491	112934	110822	90537.6	186497	101410	239274	138853	77464.4	103099	120264	169157	207112	130181	125569	111187	99917.2	135512	78271.9	65865.9	238255	364389	90701.5	312695	196307	76065.7	187650	317459	6402.9	250607	250655	206043	188352	144195	214403	172575	333111	248673	253151
P01699	963.01	574.006	926.01	310.003	923.01		1155.01				1398.02	1000.01	2792.03		381.004			561.006		690.006	1107.01			643.007	1198.01		816.009	743.007		640.006	766.008	279.003	1647.02		1816.02		604.006		553.005
P01699	63943.6	60988.9	58899.2	34059.4	47458.9	31505.9	98007.6	43236.6	37766	36607.7	111198	74018.9	129481	70537.5	41419	73906	44174.4	69217.5	69740.2	75598.8	69437.9	69739.8	42320.9	61000.1	58069.9	26799.9	71732.2	111312	1291.78	82026.6	78827	52568.7	52930.7	49186.5	127123	54263.9	87323.4	76158.6	81681.8
P01700	153755	158445	273843	68963.8	156111	82260.2	155060	81229.3	108544	77367.5	205925	137353	226906	106341	105733	145728	80873.3	78256.4	91771.9	174178	119517	147047	125551	124489	146326	88887.9	164383	165059	5299.75	130589	177050	110101	221898	92279.7	235085	114558	129172	107279	104501
P01701	101887	221983	124236	106675	134145	166389	136883	128334	153891	112260	146428	175403	197294	155279	110489	159672	93344.5	145175	159683	96588.4	80822.7	192408	86506.7	205434	162124	56171.8	38073.2	182127	13466.5	110585	183888	126479	162261	109911	224793	135418	127240	224212	143212
P01703	30300.1	24534.2	39448	20172.7	29681	20333.1	26217.9	20037.4	25658.1	20363.1	34268.2	21542.5	34624.8	24983.7	34813.1	59145.7	25223.2	21425.5	21920.5	30444.1	20287.9	37796.9	12963.3	30111.7	65615.6	12996.4	27981.4	38018.6		31111.1	32057.7	31094	31820.1	21593	29580.5	28157.5	44308.8	39255	46735.1
P01704	5728.03	2463.01			14432.1	13791.1		3368.02		5492.03	8992.05	5526.03	9043.05	6347.03	5722.03	6566.03	9707.05	5649.03	4787.03	5758.04	20313.1		3949.02	3024.02	22536.1	2383.01	1865.01	5808.04			5768.03	6038.03	10436.1	2869.02	16375.1	19346.1	7886.04	7738.04	5252.03
P01706	7409.04	18793.1	7319.05	12987.1	4078.03	2495.02	7034.05	2838.02	5305.03	3854.02	13083.1	6730.05	9782.06	14804.1	3360.02	2319.01	3645.02	10556.1	1703.01	8517.05	6549.04	9546.06	7349.04	9503.05	7058.04	5321.03	10421.1	13236.1		14589.1	12010.1	3638.02	6609.04	18904.1	7057.05	7073.04	7636.05	5536.04	10732.1
P01706	59524.3	110306	46102.2	53708.3	52703.3	116427	92686.4	79014.4	106672	48202.3	76148.4	59760.3	78495.4	70888.4	81946.4	78502.4	92904.5	68150.4	62128.3	31060.2	37746.2	100684	85975.5	106267	54331.3	36972.2	65929.4	57542.3	38917.2	45921.2	157126	55215.3	71261.4	47589.2	114861	63910.3	68010.4	110787	63804.4
P01714	39764.9	27824.8	18139.4	34164	54751.5	28856.9	63128.3	27444	33762.3	19956.2	39578.5	52731.5	59947.5	42962.6	24995.4	74421	46833.8	42335.6	26042.1	39216.4	63557.5	36870.9	28911.9	72814	91343.8	26669.5	63224.5	72297.7	25549.4	41592.9	81215.1	41408.1	68077	41620.7	68557.3	50208.7	43738.2	76570.6	56213.2
P01715	9575.94	4263.06	5348.61	4937.55	7598.07	5996	4395.05	7746.04	4048.6	4769.6	8382.32	9748.59	12262.5	4959.87	5062.77	11743.6	11440	4581.31	5324.86	10157.8	5628.62	9310.83	4418.89	15543.2	17593	3225.72	9600.97	12889.9	113.99	8152.42	12636.9	8240.3	13106.9	6242.91	11150.6	10706.8	9380.62	9991.6	13769.1
P01717	23657.2	12451.1	7178.06	13511.1	24650.2	15860.2	13376.1	8406.07	5531.05	12368.1	14185.1	16184.2	20760.2	17044.2	15915.2	20712.2	18885.2	20945.2	14918.1	13299.1	13394.1	21503.2	14918.1	25969.2	36413.3	8835.08	9992.08	32069.3		24132.2	18581.2	18307.2	21930.2	17206.2	21785.2	9214.08	14975.1	16451.2	22651.2
P01717	40184.3	42404.3	19529.1	37707.3	45756.4	44149.3	28673.2	33934.3	17026.1	41768.3	51526.5	30355.3	40794.3	51268.4	55797.4	51236.4	38688.3	47358.3	31375.2	35351.3	33745.3	34869.3	36323.3	42885.3	69665.5	28116.2	16592.1	47027.4		45831.4	45752.4	36994.2	24861.2	31084.3	41011.3	20960.2	36668.3	44275.3	51002.5
P01718	30202.2	2354.02	4555.03	3656.02	10729.1	2670.02	18852.1	5448.03	2436.02	2112.01	4086.03	21653.2	39102.3	5272.03	4485.03	4610.03	3249.02	4311.03	2257.01	4900.04	9374.07	10389.1	4285.03	20065.1	24070.1	1658.01	8487.06	20873.1	2077.01	14913.1	27430.2	17565.1	12113.1	22730.1	10124.1	11377.1	8183.06	18888.1	8475.06
P01721	3577.03	660.005	2773.02	2784.02	3969.04	1758.01	2832.02	2295.02	2544.02		5744.05	4110.03	4572.04	1757.02	2217.02	8460.07	1815.02	3153.03	1327.01	3693.03	2065.02	2010.02	2751.02	4358.04		1057.01	1033.01	5880.05		5423.04	2774.02	2089.02	5324.04	2909.02	7704.06		1625.01	7527.07	3333.03
P01742	2839.56	2792.96	2811.72	3028.34	3211.44	1553.23	11675.6	2866.64	1541.9	2931.4	4438.16	4006	5883.07	2582.25	1257.94	4294.99	1821.3	5738.55	1383.45	1215.61	2212.39	3390.58	3187.74	3799.68	9902.94	1195.96	7118.32	6064.36		3695.41	4145.97	2658.34	3794.47	1951.75	7468	6644.41	2340.17	2312.31	4524.84
P01743	1047.01	3725.04	1276.01	1183.01	2370.03	405.004	2329.02	1347.02		568.006	4225.05	2731.02	5009.05	1444.01	1391.01		2154.02	5737.06	741.009	998.011	1106.01	1092.01	2568.03	3375.03	5071.06	816.009	1854.02	1070.01		853.01	1325.01		1721.02	586.005	2270.02	1127.01	1476.02		1183.01
P01766	15270.1	6396.05	3299.02	5857.04	11908.1	5473.04	14525.1	5186.04	4398.04	6172.04	7250.06	13477.1	13320.1	4163.03	7434.06	7850.06	9098.07	5195.04	5014.04	6224.05	14705.1	24204.2	3986.03	21594.2	23462.2	4211.03	23417.2	22824.2	3254.02	20397.1	26908.2	13102.1	31709.2	17159.1	27190.2	21911.2	28117.2	17259.1	26606.2
P01768	181895	96122	26444	44205.1	217390	62612.3	234426	65370.5	83253.1	60782.9	76800.9	172497	118150	78322.4	103195	73798.8	59737.9	79787.8	70322.6	58754	176845	261101	33680.9	177316	227770	42898.1	54705.6	282092	77625.2	77631.6	235490	166190	163358	118328	212850	150215	210406	231602	207908
P01780	154256	138360	121913	65306.2	196654	75436.3	123369	83957.5	85497.5	80587.3	198798	99188	163423	128727	95216.6	112121	83030.1	98377.2	106171	75690.6	153899	134337	93337.3	107801	181083	80743.5	131102	232272	4718.29	186293	269401	138309	159229	114532	240776	116539	202919	168407	205734
P01782	51741.3	24664.2	11676	13524.4	46794.4	13297.4	60720.3	16539.6	8482.1	8440.11	13341.4	32215.2	42466.5	19767.3	14128.2	23551.9	14130.2	15008.9	24952.5	8366.15	58472.4	43004.9	10409.4	46668.6	56147.8	9487.75	59764.8	57553.2	2670.09	46110	67881.9	35748.1	63682.2	44675.8	99492.5	43414	52789.9	56120.8	73389.3
P01833	36479.1	5924.48	10431.5	6416.83	52796.4	6254.77	5441.75	6001.14	5080.62	4343.96	10123.6	6835.8	8373	6094.92	4782.09	6864.15	7420.83	7088.99	8053.48	9423.74	5070.69	7778.52	6145.69	8064.72	12659.8	8639.78	5854.16	9378.26	1282.94	7602.04	5475.29	9488.72	10540.7	5264.5	8418.85	6850.49	9584.12	11013.2	9657.9
P01834	1506390	1200250	942345	961092	1397010	613324	2237120	971095	1059980	807980	1204560	1431780	1917970	1163510	1002040	918261	642734	985676	562478	909816	1602270	1242190	1183940	1561180	2182230	848488	1747590	2054750	172232	1732280	1835380	1722330	2428420	1332110	1992750	1216140	1659100	828907	1806200
P01857	2276630	808883	1221020	1027070	1679380	840124	2205290	1253720	1371390	1242940	1343640	2065410	2359000	1384980	1200680	1445580	1401400	1509050	1153710	1452980	1524850	1934380	1614840	2135060	2050760	1127140	1842770	2275480	23224.1	1405770	1847110	1706380	1946540	1567740	2260750	1879470	1316360	1225460	1731240
P01857	91196.5	92803.3	39186.7	43044.4	147582	62162.1	98999.1	75508.5	36627.1	37120.5	53783	98991.9	127195	91298.1	59364.3	60707.2	55790.9	74533.8	45072.5	36657.4	135173	123496	65756.4	138117	173905	53300.1	123257	128293		143399	102894	113667	156418	109412	241447	79469.1	155883	86908.5	134323
P01857	1100320	1174660	679604	851212	1210200	1161760	1497690	884357	895294	814794	936771	1003580	1327430	1142350	1038000	1153640	713500	835638	661794	408842	1177140	1415600	1199610	1186030	1140510	890075	1224000	1174400	8149.05	1284930	1623070	1455510	1440410	1052750	1498750	1152760	1382070	1410200	1156930
P01857	2416720	1766850	1194370	1733700	2513470	1567530	2247310	1356430	2044590	4058310	2889330	2322320	2702530	1443580	1161580	1496350	1278560	1659150	1069830	988748	2106340	2527820	1558460	2184730	2201280	1247140	2247440	2103860	83290.7	2040940	2299290	2166760	2517830	1487620	2578320	1739950	1675930	2074870	1642480
P01857	2150930	1613470	1495310	1885230	1801620	2140060	1910120	2249460	2152110	2962400	2061890	2237130	2287350	2193460	2025180	2167500	1974010	1711940	2043480	1833950	1919780	2236340	2024240	2489020	2275960	1464570	1914290	2397090	567656	1662720	1888420	1895450	1969530	1756410	2469010	2018070	1621500	2818370	1773900
P01857	510310	339620	440461	321503	374200	235888	524545	467274	470951	351370	486199	403734	459373	427839	354874	408197	508900	496910	356162	554456	321316	356801	464418	413070	239044	413809	362298	437123	6721.44	288130	310954	319222	416870	273101	426679	365522	295931	28135.1	321377
P01857	14479.1	42982.3	68461.5	8884.08	9506.08		99364.8	11208.1	16857.1	756.006	60012.5	10112.1	112081	12058.1	14140.1	3845.03	12882.1	26314.2	694.006	27446.2	26001.2	2904.03	80573.7	5471.05	37418.4	24164.2	13461.1	24372.2		10678.1	12110.1	2485.02	66023.6	722.006	40412.3	3966.03	9575.08		5795.05
P01859	747625	1840990	1136790	1134270	1412690	843745	1229110	1041250	1085710	750852	1161550	692798	1172060	1510440	1119460	971593	973201	1137850	620710	435123	1245690	1118630	1408880	883563	1160770	988039	989293	836185	21275.5	1065160	935558	971608	1129490	654968	1401100	782589	1061700	382648	924882
P01859	146246	800512	282063	447942	294245	307841	200635	344090	308807	191739	393828	308984	485741	582997	351080	286569	285047	461718	181017	142035	334651	175878	573043	166923	226252	210487	178377	143917		233108	171243	124100	236476	117018	373295	115178	203771	153609	153381
P01859	968568	2455850	1097600	1344950	1182030	2259750	2014170	67680.5	2040360	1235350	1488750	800196	1127820	2110230	1582500	1712940	1392820	1628480	1191640	352707	1149180	2010840	2164290	1596960	44149.3	934812	1456180	1064320		1275960	69930.6	1448730	1439320	1120580	1924510	1147850	1518540	1452080	1326590
P01859	509469	458962	205905	244806	633039	352164	943950	288542	277114	238478	217121	297065	201988	384954	236883	235506	194493	245864	167858	75042.5	794042	608398	173110	439461	780826	237228	706822	849106	2915.73	921593	909630	991922	862032	553142	692143	645039	968101	879897	709074
P01860	1341360	479392	937496	1776440	563869	1219780	1456120	1115010	1326240	1096100	2181550	1463940	2137110	632783	779209	1259390	310201	414759	856051	1618420	1727500	928023	1636790	1171490	783456	1422680	903432	409246	66299.6	1469110	1141310	1099550	2049960	805150	1949440	580202	747941	957583	494345
P01861	1338450	735351	825817	957374	1345560	1041140	1542260	899693	919174	511897	1065290	946578	1054770	672640	653935	451383	536669	1181970	687127	943638	1203530	793448	1519250	1232450	2944280	756669	1809160	2727830	175988	1249280	1595090	1741440	2061640	1128350	1525280	2401530	966891	413444	904815
P01871	1656440	717066	2331910	781092	1022970	597622	1102000	652216	725600	744668	553229	1301160	1646110	774113	1173240	686998	1360220	816300	766581	1801290	738126	1421060	599813	1086350	1130620	1167110	809204	1401410	25719.4	860972	633188	600660	1459520	632759	1709850	495892	1009670	1193600	933922
P01876	896624	1350280	1085930	1369330	1352710	522655	1095690	1113640	1090990	529041	2423950	1162080	1644420	933844	1402110	903236	722197	1672990	750005	1663430	1538250	507869	1577650	1627700	2028850	658737	1211930	1741830	21405.7	1477460	1332240	872324	2036070	1119930	1668860	2015770	995920	625042	1721120
P01876	1962620	2485740	1795830	2207420	2599850	3063050	2223750	1877530	2489500	1761740	3390210	1912460	2208450	1972890	2810880	2224280	1469670	2324910	1677870	2359760	2499460	1897000	2318140	3308710	2803330	1516490	1873380	3077020	865065	2922870	3083450	2398230	3261220	2308950	2658410	3702540	2104360	3021580	3417560
P01877	65846.3	77033.4	72275.4	30560.6	357806	62209.1	130127	53309.1	28397.5	37370.1	87366.3	79268.2	129254	33326.7	55757.3	21496.6	21124.8	56507.2	26452.6	43178	90603.8	46696.7	43813.3	118489	455899	23634.5	158209	97644.6	32281.6	224439	201427	97136.9	137161	50962.2	141783	57727.2	123616	127923	243012
P01880	8964.89		39359.6		44332.5	9104.41	13927.3	12888	41787.2	2664.26	7596.07	5390.92	6329.14	19260.8	31674.2	9819.93		56177.2	15390.9	9873.14		46466.6	30865.1	10822.4		5846.33			9596.22	7652.42	11673.8	9727.95	11428.7	7633.97	6096.04	9384.15	21052.8	17955.5	6303.54
P02042	15721.4	44733.4	19073	13718.7	33041.9	45005.3	38058	13118.5	17060.2	25480.6	24690.2	30174.7	38417.1	43371.4	17259.4	29391.2	21592.5	14666.7	20899.6	48629.6	36827	79250.8	45767.1	20360.4	55830.7	27317.7	16332.7	11557.6	377.976	14613.4	47309.5	21514.9	112693	39794.8	38836.7	32428.3	58741.9	13874.2	38224.4
P02042	220112	183236	229075	11210.1	307704	700177	790380	21030.2	169964	341881	59090.5	249334	161631	380522	81054.7	470164	96237.8	96358.9	200829	214719	480568	1159370	144063	314849	33846.3	235843	152410	208808	1940.01	205564	1051320	512695	796854	644197	94534.8	525685	892688	177925	821652
P02042	187228	513721	225284	149074	432014	590133	401347	168332	222076	374413	227648	396149	466912	467462	233151	363007	302494	220465	233734	430898	438124	940693	607479	276325	602717	281552	198615	140277	3592.65	173306	478912	280553	1091100	463838	412536	348552	603624	173769	460048
P02452		800.008		533.005	575.005						2685.02	573.005		451.005	94.001		829.008	705.007	607.005	802.007					934.008	509.005								390.004				300.003
P02533			3473.5	1395.22		1506.09			1419.11	337.116	768.458		770.4	375.16	1059.95	1082.99				110995	477.399	1064.06			545.304	939.662						2064.57	469.215	597.235	2342.27	711.118		783.082	27002.2
P02533	5615.51	1275.75	1808.14	5750.47		6422.77		3131.8	2113.23	1739.77	3116.24	1474.72	2073.1	4157.66	3504.35	3044.06	2391.93	1069.17		289645		7850.05	1851.08	1984.73	2522.99	7109.37	3164.04			1649.85			1875.34	6104.92	6231.2	3554.84		4046.95	2462.48
P02533	10686.1	1704.01	2152.01	18258.1	2415.02	56613.4	1693.01	1707.01	4654.03	9213.06	9681.06	5123.03	7068.05	2051.01	21674.1	6365.04	5089.03			928409	3600.02	47875.3	3833.02	2634.02	3215.02	40862.2	39128.3					4477.03	16685.1	5978.04	16676.1	10687.1		18424.1
P02533	34637.2	6462.03	8652.04	35634.2	8869.04	170266	6896.03	12461.1	14479.1	19782.1	18305.1	10200	12465.1	8259.04	43902.2	26621.1	15976.1	6139.03	5485.03	1155030	18048.1	156936	13872.1	12124.1	10338	57100.3	72512.3	3906.02		7050.03	11578.1	32129.2	38833.2	29193.1	58526.3	28647.1	2767.01	46652.2	6856.03
P02533	1349.04			3142.19		3009.89			744.831	1157.42	743.285		1370.67		2486.91	1621.01	706.199	882.362	452.771	422300		4562.21	737.104			2742.09	1131.15				1056.98	1387.36		1755.88	3444.24	1702.92		2753.39
P02538				4600.02		3476.02		1548.01		1204.01	1903.01	1048.01		2337.01	3019.02	1915.01		1859.01		28718.1	2256.01	11432.1					2234.01					1511.01	4256.02	3148.02	7580.04	1530.01	745.004	2448.01
P02538	4031.02		959.006	6849.04		22492.2			1746.01	2030.01	4533.03		2665.02		10836.1	7389.05	1218.01			420031	2105.01	14659.1	3328.02		1542.01	6049.04	11270.1					6681.05	6411.04	4864.03	13474.1	6808.04		13490.1
P02538	2675.02			4931.04		2049.01			774.007	1020.01			402.003	1097.01	2920.02	1000.01				58797.4	2644.02	12524.1		1602.01	2163.02	931.007	1640.01					1051.01	3750.03	2601.02	9145.07			2087.02
P02538	9445.04	2609.01	2110.01	7020.03	2529.01	74729.3	1657.01	1840.01	4802.02	5754.02	10654	2817.01	6948.03	2065.01	16407.1	7829.03	2914.01	2339.01	2029.01	953097	2224.01	42656.2	3333.01	3669.02	3520.02	21391.1	28071.1			2933.01	2962.01	6144.03	13847.1	9334.03	9882.05	7543.03		11853.1	1506.01
P02538	8429.05		1105.01	17932.1		31639.2	1184.01	1482.01	4658.03	6920.04	3306.02	4607.03	7281.05	1785.01	26723.2	7362.04	3463.02	1847.01	1028.01	162051	1340.01	47931.3	2781.02	2414.01	4433.02	15036.1	12691.1				1146.01	2961.02	3700.02	13827.1	10923.1	7542.04		13238.1
P02538	88432.6	82672.7		138384		138807			78955.6	83222.6	126929	66599.4			87242.7	52546.4	72837.5	60755.4	104828	914208		91782.6	122427	76159.5		78099.5	97257.6					66792.5	120998	119396				79175.5
P02538	1962.79	2060.9		859.508		1001.56		2029.83	1098.83	1526.9	1632.88		880.065		2174.19	1355.68	1240.52		784.031	413857		815.41	473.398		1141.08	3685.44	1333.99						2397.76	2462.57	2751.31	896.221		2014.37
P02538	2280.48			1644.87		6237.45		714.688		946.986	1029.03		20339.5		21277.6	1957.23	977.629			339147		8045.43			1504.5	3776.08	5093.75					2491.03	1247.49	3431.09	3560.59	2312.11		2845.9
P02647	3303320	3788000	3892690	4367510	2399000	3404370	3575950	3322270	3600310	2773240	4425090	3495070	4199860	3714290	3833660	3540770	3880610	3982090	3068980	3881640	3896130	3138840	4371610	3519230	3742270	4123870	3650790	3316380	43765.7	4205920	3516970	3185940	4070830	3571520	4295270	3290310	3697240	3043060	3672530
P02649	550388	349680	601393	408545	449334	257006	520964	213118	297219	300039	536482	376965	526829	404808	376719	376997	510566	369875	520700	487714	307926	406968	579357	426082	428265	390284	403987	345885	50026.2	259136	200742	263819	600999	200324	475464	273503	348777	303307	558284
P02652	978445	798890	936690	1190480	467488	548524	703418	554340	829064	908253	1139790	1098370	1072920	843200	1025520	687027	1048900	1373650	449283	787053	1417720	870994	1147090	797516	902795	884107	805475	724700	328875	888855	723434	663499	1006570	887096	921043	883812	660024	556789	1103700
P02654	487703	367048	609079	401437	216599	201940	339792	273021	247882	288334	544542	264698	402428	395888	394549	359248	377275	387787	358438	465339	370461	262004	579613	286892	445676	536114	331568	328311	4196.99	324312	296929	227841	606696	346902	413758	236915	453455	242073	485904
P02655	497501	305775	606731	310027	235586	152899	591394	186641	189766	255642	307972	246772	295293	244300	523337	166344	277608	273678	450886	494762	228977	218801	431750	423938	385040	326877	212102	290763	28224.6	229557	199112	248410	604201	269497	298864	100144	547081	224089	706591
P02656	669629	657717	1134670	610926	326401	339181	1018590	406746	379161	469456	513930	519978	731104	393851	734682	492609	592335	562729	569741	964717	575535	518761	891079	773399	637942	533704	658235	478298	1616.21	475229	394594	458859	961463	414249	656739	268971	714834	370249	995290
P02671	62823.3	63504.5	73672.6	81315.6	99031.3	58934.3	69384.2	65147.4	70710.4	54278.4	89487.2	62860.8	95687.2	60736.2	61340.2	84644.3	68661	79424	75597	54637.7	58942.9	68455.1	78033.4	87224.2	91313	97042.6	93895.3	58316.5	43104.8	73969.1	117659	65799.8	108848	86596.1	184181	171307	101448	50023.7	65067.3
P02675	1488.11	1942.49	1252.95	2147.93	4303.44	2815.49	1344.51	2050.22	3716.88	1399.7	2306.53	2032.59	2688.85	1516.81	917.357	2691.48	1327.35	1554.87	1306.86	1604.18	1365.69	2168.94	3134.22	3669.17	1567.09	2352.01	2998.23	1911.37	267.344	1344.24	2982.52	1587.52	1431.48	1225.81	5643.93	2581.4	2235.54	2090.71	1522.19
P02679	2498.35	1627.46	1920.84	3271.3	5207.1	3928.81	1981.25	2395.74	4342.07	2260.52	3005.85	2435.76	3946.22	1854.91	1507.02	4149.22	2038.26	2361.85	2134.22	2867.96	2190.47	1939.21	3754.85	4244.82	2019.89	3367.64	3963.12	3153.28	701.759	1927.3	4062.52	2586.87	1960.51	1824.71	7185.68	3569.34	3313.37	3604.84	1581.07
P02741	4658.57	2763.81	11657.7	2957.72	184083	32954.2	13981.5	1940.08	9957.6	19392.9	11623.4	8394.1	6402.66	1281.96	6494.35	9209.39	3971.48	45277.7	4449.49	2805.81	3095.58		2541.3	162286	9519.23	1072.02	7577.1	7269.08		4554.78	11744.4	2516.04	8052.73	2450.04	2522.83	2642.86	1757.49		4505.42
P02743	122994	95989.5	143525	113470	99520	53441.8	143041	32337	76234.2	84729.4	102557	101692	123345	60657.2	89440.7	98911.9	64060.6	164520	97195.9	72985.3	72232.3	63640.6	139593	154544	122587	80074.9	123326	107143	1519.35	83449.9	126005	93266.2	102469	95082.3	93647.1	84302	93810.6	26724.5	123561
P02745	55096.2	48443.3	85427.2	52420	48022.8	48529.5	80689.6	41616.3	49030.8	40018.8	74499.7	57689.3	51941.6	43277.4	45039.8	60986.7	56472	53623.4	40154.4	76214.3	45312.7	48711.2	52034.6	30154.6	52973.2	50937.2	50784.8	41093.2	11189.3	54894.1	98460	41792.3	63594.6	47580.9	61993.9	49737.6	71977.6	34429.9	47169.8
P02746	229574	279456	363008	310429	260139	209759	265509	237706	242348	189192	341987	226210	327933	272013	252650	235149	249953	290684	217370	280923	234271	251926	323359	161615	315266	213271	271434	217263	7543.76	228987	155582	161849	303185	212813	374939	167027	203165	129302	204507
P02747	165793	165539	245994	225277	233763	159724	209761	147354	180062	142614	251755	168972	225015	186545	167342	214321	179269	175545	178222	197496	171577	208283	227171	121133	193913	173969	212938	173859	5057.84	159747	134683	125168	224572	176819	220200	150542	154658	137685	152594
P02748	146952	83240.4	202252	134677	222915	199428	137691	98247.4	209431	100409	182661	146260	227708	134332	130324	148161	146646	233142	157288	128623	98527.5	127141	137228	230239	149443	123241	169348	129813	9378.03	133606	190334	116431	65921.8	143321	197224	149899	110644	88114.5	86638
P02749	736297	601458	716615	748758	581979	463087	787694	457800	402446	272058	692397	455620	629878	426431	374425	304784	271173	338460	319436	547730	528321	380786	611444	578316	779085	410181	646212	564304	30594.2	642334	436891	427200	762499	631705	847416	514850	611210	271848	664961
P02750	155227	103907	159998	119897	267368	160746	139159	165791	163331	88451.9	169780	171895	217860	160116	142962	107095	156108	196423	139769	144748	101975	150306	137832	287498	139838	103900	180700	151578	13787.4	140717	194583	95271.6	170679	145284	203137	107124	87115.3	125531	99191.6
P02751	218615	282562	250774	281510	171397	151985	179832	147889	169162	236933	268403	195605	260360	196470	241129	219907	170622	274402	177102	291718	111124	26890.1	391776	164836	167051	146336	234107	255797	51374.4	99051.2	50556.6	117195	43486.4	44779.1	46339.8	39385.6	56731.5	118489	36316.7
P02753	278397	137802	170115	188151	166387	107605	270045	110018	84660	126134	107793	150905	174650	110056	166924	94350.7	102198	104399	101789	143552	184037	255022	138709	227459	280314	78146.5	196651	179328	13392.8	161304	149125	137885	266980	286631	228107	151830	232994	82485.2	255654
P02760	439119	548041	530829	593787	482025	343286	508028	421761	461165	324474	798881	498507	628614	507593	556952	411464	397626	553550	407589	691542	426495	409512	658919	552680	798745	438829	508536	488338	177244	540280	450688	325040	701659	435345	512344	371209	373652	235751	544077
P02763	783523	599076	1234230	737625	1274070	709638	754249	583325	723438	453354	829817	823181	1119610	558289	799512	642698	775363	934979	819629	797440	715327	995996	1102280	1312040	785182	554823	855087	817330	7442.84	597769	773269	569454	878077	692207	713411	599455	510472	302966	826466
P02763	871651	606017	1075620	651293	1417110	498760	1063500	770173	645456	311095	682842	749976	1169170	668213	785302	561584	585780	883676	582035	704196	821624	1045910	1060790	1314140	1020000	342802	1021410	1102480	85503.6	776524	885074	747991	1198580	865434	933473	670884	625631	329126	1027630
P02765	711119	880470	967390	845902	673625	535898	677089	479429	752929	496156	990090	510480	706588	682270	595915	537722	461219	728398	680393	744392	611404	616563	844492	508097	872734	660485	437175	633135	46318.7	722208	557242	551173	782637	701486	799532	603494	664928	714711	572606
P02766	110663	145290	240831	159944	64980	35640.8	177880	82664.4	96440.2	75649.4	147667	94281.4	144975	94842.6	160261	103468	139558	125889	93560.6	141059	105995	73059.6	246105	79410.2	108535	137714	98600.4	69101.1	1068.51	62861.2	45104.9	37672.3	121458	78517.1	93001.4	49971.7	79477	12971	84003.1
P02768	3393390	3382460	3346860	3270630	3461540	2077890	3689950	2894380	3003380	2296440	3378060	3199390	4049090	3118490	3148930	2832030	2966190	3123780	2695140	3227940	3152860	3248040	3603830	3012940	3720340	2785820	3528710	3245130	269111	3269350	3079140	2824750	3903430	3349790	4362120	3278280	3453000	2464920	3208320
P02774	809490	763427	1075670	1003710	790733	521389	692328	643185	794402	548205	957871	759799	1070270	806266	872922	793069	801817	873820	803431	835813	692208	627270	1078910	764789	781478	713056	829738	704526	54089.6	722349	712421	613125	871108	704368	1096990	610988	639613	393653	855204
P02775	92637.5	144401	161396	166865	185894	48230.5	145232	91541.6	91397.5	97881.7	171241	121595	145695	126056	140050	107283	149227	161280	124487	103181	106666	75008.7	192873	109943	128539	94581.3	135225	85858.1	6952.22	102029	49237.3	76445.9	163036	120644	106502	66408.9	90975.2	72134.1	129405
P02776	30658.3	28273.3	31501.3	31997.3	56347.5	5368.04	49734.4	12456.1	14418.1	19647.2	24720.2	25553.2	36713.3	30054.3	25113.2	15657.1	31409.3	32562.3	22648.2	15857.1	36001.3	19091.2	40721.3	34072.3	44306.4	13663.1	44831.4	35860.3		34677.3	16896.2	16863.2	46060.4	39133.3	35727.3	24326.2	36013.3	14290.1	42705.4
P02776	60728.7	75116.1	83895.6	92793.5	119365	15299.9	76593.9	31410.3	40111.1	47164.8	56623.6	65705.6	78473.3	76405.8	76079.2	64804.8	89348.5	84866.6	69529.7	46813.3	60964.9	50208.8	112720	71274.9	73303.4	51317.4	70955.7	61038.4	4473.98	61722.5	40519.7	36179.6	86056.4	72959	66640.6	44660.2	56808.9	43141.2	78950.7
P02787	2603080	1883510	2882690	2700570	2686730	1789830	2709330	2008440	2292740	1625270	2025540	2509740	3197920	1877750	2417670	1474990	1451460	1658280	1960060	2699060	2606440	2172180	1783540	2636190	2791860	1196840	3025510	2691180	51179.3	2425620	2486190	2666240	3198180	3094450	3799650	2270180	2773030	2686360	3139630
P02788	17887.8	26758.2	66048.5	93899.6	25800.3	22133.5	14184	22026.5	37586.4	24709.3	50984.6	29498	38067.4	27288.1	35274.6	28731	24371.3	18258.8	31320.9	90522.8	21451.5	7962.61	31757.8	10458.3	19380.7	26089.2	14967.8	18473.7		14348	9473.35	14934	13612.1	12623.1	19513.7	11296.2	10772	12291.4	11612.2
P02790	2138610	2239130	2684200	2412650	2289160	2031940	2260200	1860040	2034760	1469200	2460660	2245010	2845150	2185860	2412120	1869980	2231830	2307310	2201040	2525040	1971580	1667720	2618410	2568650	2253670	1780410	2332340	2155270	9266.94	1945530	1980650	1488880	2615580	2127160	2679950	1604450	1869240	1028630	1962540
P03950	3873.07	4125.63	4847.53	5994.27	6602.6	4484.74	2749.21	2026.5	4351.6	2796.78	2411.85	2310	3819.17	2221.15	3512.09	2113.28	2828	2791.18	2952.23	2809.3	2516.81	2738.59	5617.45	3907.08	4457.92	4239.05	4341	2366.29	1095.04	2625.92	3080.07	3187.12	5213.69	3761.88	4288.59	2860.75		2521.09	3656.42
P03951	12284.7	9993.41	13950.3	17536.7	18041.8	9016.47	12058.6	12535	12225.4	6827.91	14955	11975.5	15582.4	7481.13	15209.6	12833.8	11781.4	13851.3	10866.6	10409	13817.6	10873.6	17300.4	16488.6	9081.91	4621.92	15552.6	12786.8	6101.41	11296.3	10910.5	10161.7	17743.7	14072.5	15778.1	9518.74	12016.1	8889.91	16519
P03951	46966.2	38078.2	59807.3	60264.3	67337.3	38988.2	47641.2	34390.2	29289.1	29000.1	51263.3	36030.2	71715.3	38246.2	54171.2	46029.2	33847.2	32078.2	51977.3	51831.3	24239.1	22790.1	55312.3	38157.2	38912.2	37527.2	56014.3	56481.3	2002.01	66527.4	67048.4	45270.2	72520.4	44413.2	70433.4	36074.2	47734.2	42084.2	57447.3
P03952	68189.4	71705.2	76358	87977.3	56587.9	45906.2	59859.3	51670.3	48988.1	42606.1	67152.8	57787.4	75944.2	56719.8	78130.2	79166.1	74194.4	66503.1	65503.6	77988.2	32145.9	46065.8	81862.3	59401.1	53812.3	55437	71475.8	71823.1	23036.6	56190	45211.1	51820.6	78441.1	70364.8	68221.4	37996.6	61563.3	43107.2	82208
P04003	436287	406701	544460	497638	468461	417896	451203	368888	348313	291934	516125	442239	569916	358791	505494	431343	321838	532058	413549	452082	364345	329434	477980	540890	434810	290350	523467	491194	42646.4	441382	370819	311015	608910	433671	643631	339828	360267	222509	551479
P04004	488360	569090	703148	517391	599370	474207	502202	402038	489096	462218	540652	476681	612975	414119	622373	489138	450609	578191	545679	656019	470233	332857	663924	500352	607288	428813	455123	513925	17265.2	418804	284458	384655	664061	614845	589752	364448	395439	305502	602752
P04040	2787.56	2046.32	2107.73	2356.18	3213.39	2868.56	2838.01	1630.88	1245.48	1627	1481.07	2769.86	3575.47	2203.61	1281.29	2925.88	1997.03	1638.65	1373.3	5996.24	2402.4	6546.53	3522.31	2709.14	3110.62	2351.14	3015.61	2654.24		1444.11	2568.13	2245.39	5827.57	2597.78	3503.9	2396.87	2720.29	2235.26	3181.12
P04070	12858.3	14035.3	18970.2	18094.6	11414.4	8777.79	14240	11599.9	8718.86	9749.32	14636.8	12179.8	17344.8	12697.9	15995.7	13392.4	13613.5	16756.1	12446.6	16383.3	11292.6	9437.22	19454.1	13435.2	13972.5	11932.5	14261.9	14779.1	5612.75	9757.04	8359.99	12558.8	17216.5	13330.4	18342.6	9623.91	11761	6259.95	18601.2
P04075	1689.07	4357.91	1650.65	2077.92	1628.59	1387.91	2009.84	1520.52	1018.4	1005.84	1863.39	1714.97	1139.49	2063.37	946.922	1306.69	1510.3	1462.47	977.161	4406.15	1428.29	3071.25	1082.55	2895.04	1429.49	2648.88	1655.67	2089.06	357.007	1291.18	1437.05	1254.54	1608.25	1282.32	2104.29	1820.13	1059.99	1239.5	1404.06
P04114	675173	406817	522223	602670	544083	195748	556984	323775	242614	393368	439389	432550	557131	435380	539677	394398	385608	607238	469973	370073	487867	322823	781282	562369	560623	388618	513953	418031	19163.7	339080	363238	342883	861642	314987	638051	335598	408484	211382	553591
P04180	13514.7	15325.5	19412	16420.6	9677.03	11138.1	12478.8	10744.3	10120.6	10941.1	20430.8	11953	17073.9	13471.1	15769.3	12328.9	14304.3	16316.1	11610.4	19392.3	12829.2	10061.9	18398	12466.5	14606.5	14190.2	14638.3	13003.4		13436.7	8201.99	10186.2	15584.7	13686.6	16402.5	11006.2	13498.4	5089.75	16270.9
P04196	124687	126271	93676.7	106662	128374	74833.9	90178.7	129917	138408	81964.8	96595.2	112471	137421	93722.3	111052	111251	86947.5	122404	81758.6	115323	113205	72770.3	110450	121896	95184.1	118541	90982.9	117431	3459.18	110708	88442.4	62651.5	111707	59793.9	120154	90118.1	73515.9	47290.8	97690.8
P04211	11151.1	10348.1	7629.05	5575.03	12482.1	8604.06	9030.05	4496.03	5644.03	8316.04	13762.1	4410.03	9498.06	11070.1	10634.1	9652.06	11502.1	5436.04	3758.03	8301.06	7865.05	20474.1	7617.05	13883.1	11303.1	4064.03	17164.1	10397.1	1278.01	9642.06	11280.1	14548.1	6859.04	4192.03	20278.1	9859.06	12911.1	20844.1	10902.1
P04217	577583	607850	852520	618209	697405	467327	549865	487182	644811	300667	1016470	710429	961140	565522	649131	699932	593301	723801	515324	817638	526809	719000	797539	762910	605350	621434	710282	627612	8465.85	656065	636623	487771	837053	561996	1031810	491178	436004	364035	713944
P04259	693.43	266.796	227.137			233.146				662.183	455.476			596.086	1097.96		290.831		239.155	75215.5			535.425			793.179						478.31			1168.14		284.414
P04259	14350.1		2794.02	21045.2	5348.04	19936.1	2869.02	5061.04	6438.05	5165.04	8459.06	2947.02	4465.03	3249.02	22010.2	9142.07	6886.05	2458.02	2040.01	665605	6072.05	48911.4	4775.04		3342.03	17582.1	30934.2	1113.01	1656.01		2819.02	9437.07	15816.1	7937.06	39783.3	8445.06		9573.08
P04264	65835.9	10967.6	22059.6	104075	19897.4	185315	18752.2	32165.9	27952.8	40402.3	41609.9	19945.5	27413.5	20792.9	107592	64648.2	30909.8	13932.6	15997.8	2759850	44647.3	231300	34380.9	21603.1	22264.3	87763.6	118368	6218.35	6643.31	10242	19428.8	59134	67730.8	46683.6	129089	55198	6092.05	78243.9	9091.04
P04264	39444.2	5954.03	8311.05	92867.5	10891.1	329983	6168.04	6256.04	21511.1	37801.2	47532.3	13228.1	28513.2	16958.1	111966	77332.4	18658.1	8954.06	13900.1	2615980	36669.2	209712	35562.2	11114.1	16554.1	83910.5	110847	4315.03		7097.04	17564.1	54797.3	80308.4	49832.3	129602	58071.4	5421.04	77049.5	3374.02
P04264	26086.3	2714.03	4175.04	42725.4	7199.07	117024	2567.03	8883.08	10628.1	17815.2	20623.2	9531.09	9926.09	6161.05	42619.4	26277.2	11486.1	4611.05	4514.04	678711	15743.1	123036	11885.1	9168.08	8043.08	45005.4	54906.6	1182.01		2430.02	4634.04	17980.2	30434.3	18348.2	46256.5	18660.2	1403.02	31352.3	1546.01
P04275	16528.1	19612.3	9910.97	22139.1	20078	44124.5	19987	13036.5	20679.7	20618.3	43166.5	16774.1	22448.3	8332.47	12719.4	21287.1	18258.8	28637	14292.2	16808.4	10946.3	9972.01	16054.5	23486.9	12205.5	25343.1	21351.3	20369	9051.86	10737.8	6854.39	10190.8	8318.06	4259.69	13108.6	9635.76	9552	12147.2	5444.31
P04278	9676.41	9619.22	10189	10092	12802.4	9677.18	6463.64	8155.98	8427.87	6532.2	45618.3	12447.8	16281.5	24005.5	7128.43	7721.7	12875.2	11780.9	17773.5	10422.9	10291.8	19408.1	10336.8	10319.2	10420.3	32191.3	21670.5	8141.86	3334.82	22331.3	14330.6	7164.39	12211	9145.97	22654.7	17571.1	11879.4	12090.5	4672.23
P04406	1456.02	12933.4	3160.24		1857.01	1083.81	3745.19	1449.08	1394.49	612.63	2659.6	2364.83	2748.17	4467.26	1625.73	2004.52	1948.66	2354.99	1357.64	19663.6	3601.68	2168.39	2970.09	5921.16	2727.04	6640.91	1899.86	1508.69	903.081	1357.63	1180.72	1196.19	2690.19	877.891	6452.12	1975.99	876.43	1762.96	1023.85
P04430	3828.48	4564.5	1695.51	2176.07	11373.3	1853.93	5265.63	2342.15	2598.66	2217.91	3411.04	4722.05	5984.47	3838.58	3108.74	3768.7	3120.54	4162.58	2482.77	2634.9	3183.2	6568.92	4243.21	5748.96	9019.32	2852.02	7345.06	10865.8		8034.21	6115.48	4375.76	4717.08	4340.23	8755.86	6468.83	7209.65	962.181	3066.15
P04439	10060.5		1830.8	1484.79	2934.78	779.786	1492.76	818.676	3743.11	887.481	2064.7	3709.54	4640.68	1142.81	1489.77	1905.07	3315.1	882.494	896.455	900.443	1747.97	3473.93	1482.79		2017.66	1996.33		6027.83		800.727	3122.02	875.515	1270.39	2300.99	3660.61	3897.11	1646.75	3355.7	3678.65
P04908	1207.01	4601.02	2227.01	1796.01	2434.01	1202.01	2417.01	1414.01	1355.01	1155.01	1859.01	1676.01		2314.01		2328.01	1082.01	971.005	1176.01	3538.02	965.005	951.004	1378.01	3219.02	1452.01	2123.01	1553.01	1338.01	1151.01	1177.01			742.004		1789.01		1141.01	4092.02	1534.01
P04908	680.683	5825.97	697.321	573.286	1011.95	824.382	1632.12		878.837	201.18	1727.42	1332.51		1090.39		747.854	822.87		437.149	5389.53	1226.45	568.718	343.367	2850.63	963.545	2319.99		709.421	378.157	659.33	812.281			406.897	1359.22	334.94	650.429	428.074	570.261
P05062	4909.14	1290.37	1631.79	1571.71	4333.6	6754.39	1506.99	752.667	1245.54	1414.98	1609.64	1242.2	1538.25	1384.44	808.378	2383.69	872.384	1338.21	1319.64	2743.98		1053.73	1548.01		3345.59	3861.63	1361.91	1987.76	567.76				2440.54	1434.22			806.007	13345.4	2531.21
P05067	1445.02	1332.67	1600.01	2417.31	2758.25	660.274	1585.73	623.029	822.544	977.105	1180.63	1516.62	1786.79	1990.29	1607.31	1356.59	2200	1321.87	1467.44	1554.57	960.216	1356.05	1918.49	1123.89	1323.52	1169.71	1795.32	1396.69		1135.88	1075.46	622.775	1531.24	1350.67	1388.73	829.44	1561.16	715.053	1587.67
P05090	476225	217630	241879	302646	505869	328066	426645	277053	300528	115133	200202	256805	258549	243756	173851	128265	124551	138193	174505	118370	351207	354355	267754	501276	498407	264289	383881	326792	69031.8	451867	484356	329999	500426	419634	510399	590809	575579	500483	446092
P05109		1570.02			1345.01	1054.01	2819.03		644.007	734.007	566.005			1019.01		1099.01	564.005	904.008	546.004	2054.02	618.006	804.007	1242.01				830.008										650.006		523.005
P05154	4893.58	6587.71	4879.7	4542.12	4446.26	2528.49	4878.96	3887.04	4316.42	3849.92	9286.13	6460.57	6878.22	4521.34	4550.56	5645.68	4469.82	6046.29	5448.42	7486.85	4632.81	5805.71	5745.72	4176.19	5934.16	4660.48	7713.92	5284.47	2332.18	5485.01	4432.51	3544.26	6621.2	5449.78	8915.08	5045.62	4921.19	3200.5	4762.64
P05155	647082	599801	678273	742769	791309	702734	519676	569987	609250	493113	969345	711217	972678	767747	698771	609998	652843	745710	631783	775700	533995	619866	942243	850879	659863	706181	710088	532500	37299.2	612454	582403	417584	701284	733706	997367	479243	487836	276658	573522
P05156	69294.4	101224	146572	106966	104912	104754	88549.7	66574.7	84582.5	80203.5	112947	91415.8	121764	91110.3	79709.9	79632.3	91511.6	123314	81278.9	98780.8	67675	54689.9	111192	106824	96407.6	74686.5	85108.8	80853.9	9985.05	82391.4	69550.5	62823.2	103674	89353.5	103039	52092.2	67030.8	41420.8	95133.8
P05160	24993	18342.5	23385	26887.1	37130.8	12395.9	28429.9	17672.3	10907.7	7592.1	31766.7	20622.7	25997.7	20818	15564.3	9628.81	10099	12014.8	12205	17219.4	21338.7	19734.4	14833.6	23093.1	29728.9	15337.9	27650.8	23552.9	1674.1	20320.7	18244.2	16771.6	27985.8	21861.8	25571.4	16402.2	16899.2	15640.7	23907.9
P05362	2537.96	1620.72	1597.85	1583.76	8655.7	1292.48	2237.61	1167.28	1478.49	1230.89	2829.43	1426.33	2222.51	1977.05	1215.35	1596.67	1347.71	1621.3	1661.06	2065.47	1565.3	1972.26	2143.19	1596.81	2301.46	2499.13	1790.49	2334.36	1743.73	1172.49	1699.83	1341.68	2555.13	1586.51	2096.27	1874.51	1794.05	1529.43	1592.15
P05452	44226	50820.2	46425.3	58435.3	39507.5	28282.1	45954.6	40440.7	44402	28131.5	82830.4	48081.2	60650.1	50599.5	52338.9	57652.5	49748.7	46142.1	41077.8	58063.1	40708.3	38023	68256.4	39653.1	39555.2	51632.7	40715.3	40994.6	2977.52	48372.2	31557.7	28938.1	50381.9	38400.8	58145.6	41022.6	36784.2	37659.9	35428.3
P05543	37929.3	33085.7	34162.9	27960.7	48599.7	25790.2	33872.2	21731.7	24539.1	17314.2	29132.9	35383.6	47130.8	34050.3	26943.1	25256.4	26798.7	31185.2	29076.5	32007.4	38168	39441.8	31373.6	49003.6	50381	28292.5	48527.2	49118.2	3658.65	45169.8	41954.1	35087.5	41521.6	49902.7	65987.8	43818	33197.1	32196.6	31134.1
P05546	239039	205471	312223	222540	154109	138867	151182	118304	109561	132208	228423	175062	243594	136322	236961	130433	159894	208974	227110	188841	128525	99380.1	229027	141212	137437	155135	177508	176942	7084.28	196903	132222	127008	236381	149272	232386	118608	125473	95180.1	182199
P06276	30304.1	25961.4	34002.2	28240.4	16382.8	11979	19660.5	16921.4	18344.1	18072.1	32180.1	22854.8	28101.3	26162.8	23761.2	22672.4	23656.8	30972.2	23162.7	35491	20020.8	16127.4	33522.6	21331.9	25337.8	21374.9	22695.8	20120	707.797	22381.8	17578.1	19058	25005	21904.8	23569.3	15004.5	20140.2	13206.8	27496
P06312	166658	85425.6	70682.6	64307	168803	65698.2	159194	72745.9	64242.3	53963.4	110606	126746	153920	97125.8	72216.3	78154.5	67197.8	71444.1	49786.8	65488.2	124637	157865	78473.7	187494	228030	43993	164920	224393	7211	123412	213023	184187	210527	141306	228704	127612	198389	129818	197963
P06331	54782.4	38558.1	18107.4	27627.1	50932.5	29504.1	42481.8	32161	35230.5	32357.4	38716.5	57777.7	44764.1	51383.5	40595.1	38918.9	46487.6	47691.8	31177.3	44611.3	51852.8	73053.5	26143.8	46957.5	112705	17685.2	52430.6	52048	30138.6	33210.6	40485.3	43063.7	56740.5	45443.2	41946.4	32961.7	16951.8	67902.6	66748.8
P06396	153168	182588	163141	189331	126192	90996.9	157631	164982	177826	122285	265827	156382	221916	179981	152367	174154	130953	124795	140150	159428	142960	72035.9	205551	128209	167085	166086	150764	135142	30792.8	160066	129585	117489	184997	121811	189013	165403	151904	110999	110953
P06681	45350.5	42481.7	62587.3	56023.1	64927.4	42592.4	48613.5	34506	42170.6	32173.8	56985.7	47620.5	61463.8	46627.6	49463.4	49160.3	44233.5	54663.4	43047.3	49489.2	36281.1	44060.6	56395.4	49097.1	45077.1	37721.7	46097.1	42366.1	3604.56	37153.9	37731.9	31926.4	53916.3	44933.1	65979	33723.2	32235.2	22194.1	50200.8
P06727	416333	318712	430964	566740	225153	724199	716670	256523	385891	326031	514237	226214	310512	399135	341725	507527	212670	354850	290069	458066	362500	283450	473948	211837	597769	523916	409457	446212	33619.7	410942	374961	240312	503210	386076	310950	317703	605036	502974	288857
P06733	2312.45	14478.5	1935.6	3353.32	3074.17	1545.31	4221.23	1296.26	1454.71		3187.82	3651.24	1346.93	3452.14		2593.45	1550.06		885.983	14656.4	2630.33	2498.92	2739.16	7756.48	2832.54	6986.78	1315.6	1553.86	1444.89	1202.65	685.331	974.6	2350.24		7049.05	961.549	1044.13	725.019	1248.21
P06899	5624.53	16126.3	6774.48	4130	8455.34	6005.18	8688.74	3743.35	4234.18	4891.3	6501.02	5926.05	4346.37	6900.7	3997.78	6933.76	5860.97	5418.18	6063.28	15413.1	4967.42	5983.15	5835.89	10987.6	6607.21	9311.79	6901.7	5281.96	5604.5	4802.15	5207.83	4009.8	5324.02	5396.15	8955.18	5864.95	5619.53	9615.31	5459.26
P07195	2476.6	2718.95	2133.55	2526.24	2548.77	2294.14	3135.26	2302.6	2722.2	1892.81	4295.69	3039.97	3632.53	2943.17	2170.16	2630.85	2366.25	2957.22	2531.35	3112.71	3365.64	7546.39	3584.84	3077.24	2410.38	3093.61	3979.01	2434.62	506.123	2892.96	2422.86	2612.98	2995.46	2662.51	4718.3	2735.51	2400.53	2625.64	2929.95
P07225	84797.7	83649.2	131494	110571	82161.8	78583.1	95392.9	76741.3	77725.6	64891.4	109334	84779	112667	78679	95235.5	89017.7	84748.5	113203	97065.3	112236	77450.3	61143.6	125391	105262	93101.7	72571.7	102676	94312.9	7287.65	91741.9	68988.4	79205.6	119162	90786.5	114308	71424.7	84026.8	56323.2	120066
P07333	3833.04	4064.05	3018.04	4068.04	5043.06		5536.07	3472.04	3565.04	2845.03	6246.08	3509.04	4626.06	5977.06	2916.03	5019.06	4559.06		3138.03	7497.07	3341.03	5160.05	4250.05	4968.05	6813.08	4831.07	4475.05	6208.07		4296.05	3959.04	4400.05	6202.08	3926.05	7408.09	3621.04	2900.03	568.007	3283.04
P07339	2614.87	1341.2	2372.96	1488.18	3434.73	2369.29	2713.82	702.963	1471.75	1858.26	1754.71		1778.27	1546.3	1824.68	2003.09		2190.53	1280.76	9555.03	2252.57	2465.07	2824.05	1977.22	2493.85	1622.21	1831.94	1966.57		1948.37	2065.46	1676.74	2925.13	2581.07	3439.05				1913.83
P07355		2647.41	142.308	786.396		321.81	904.66		372.339	224.782	398.725	557.255		922.735		824.272				4945.91	603.951	1077.92		1140.43	267.636	1284.05	489.992		229.93	2572.7			590.758		1071.15
P07357	39790.6	45435.3	68051.5	63213.7	46707.1	44606.1	52621.7	45094.7	42815	36954.7	65351.7	42184.5	53343.3	42694.6	50376.9	45976	51173.3	64308.1	45889.3	55996.8	28068.4	32554	54301.4	54358.5	52292.7	50868.8	41889.4	41727.3	3654.87	43155.7	32529.2	32548.9	47714.5	47297.9	59411.4	30702.8	34609.5	31481.5	41495.2
P07358	54934.1	64303.7	92118.1	83737.4	67504.7	60044.2	78306.7	62748.4	62877	45304.2	94195.5	56764.7	79971	62540.2	71321	63986.5	72187.4	87001.1	67375.4	79220.2	40740.6	45901.1	83075.8	78055.2	74953.1	77084.4	60138.7	56944.4	4330.19	60904.4	47915.4	45784.9	67800.6	66001.5	91607	41911.3	52387.9	44677.8	66808.3
P07359	9845.23	10575.6	17627.1	12844.7	12944.8	2169.23	18598.8	7602	9191.52	9767.92	11442.3	10194.1	12948.6	11604.3	9676.32	8973.87	9431.81	10833.6	10716.3	12120	7360.03	21199.5	10795.1	11244.4	10018.3	6017.54	12854.2	11965.1	3494.19	8067.09	6536.13	6744.02	5773.73	7851.64	12547.8	6686.65	6168.25	6316.08	6350.9
P07360	87166.8	95441.6	141075	122131	111010	85675.6	93900.6	75413	88395.7	69513.1	131433	70065.8	104341	89399.8	85564.3	80937	76930.4	115231	86548.1	105893	38571.8	68189.4	123074	117500	114658	106148	83084.8	83230.4	5997.03	85878.1	67315	68790.6	111525	88732.4	140474	62354.4	73711.1	57191.2	99226.7
P07437		4128.71	915.624		803.609		861.716	479.096	589.825		936.992	720.29	789.358	1679.34	296.009	966.521		1324.28		3817.86	1172.29	699.458	1090.43	2534.76		1942.7			199.532	683.015		451.688		433.051	1688.35	1391.33			486.771
P07737	1651.7	5116.74	4672.75	3489.82	3564.3		3953.85	1757.7	1222.09	1600.01	4642.56	1659.39	1473.36	3662.41	1906.33	1820.65	2878.01	3568.25	1447.83	3681.36	1217.22	3106.1	1894.59	2438.85	2070.61	3421.32	2765.35	2756.89	172.747	1241.43			1882.91		2725.93	707.411	1139.28	2942.85	1264.09
P07900		1532.15	632.836		1178.87	627.278			613.167	273.231	1012.52	813.763	1253.27	867.157						1758.44	691.416	1145.52		1073.53	812.484	1291.54		974.91	411.771					758.12	1199.47	801.735	1289.19	1752.27
P07996	26517.4	30980.7	46214.9	38327.1	51146.6	6710.28	39929.3	16515.1	20964.1	28843	38390.8	30718.6	38376.7	38586.4	30913.2	25978.2	37511.4	46169.9	32685.8	32164.8	25920.5	25428.8	37130.6	19016	24441.9	17537.7	45978	33746.7	5668.68	22371.5	12710.3	21616.3	35544.9	28316.1	35478	17054.5	24154.5	23387.3	32926.9
P07998	786.007	1144.01	1021.01	475.004	524.005		823.007	1273.01	1126.01		1185.01		885.007	933.008	861.008	804.007	232.002	708.005	624.005	1255.01		364.003	955.008	378.004	1566.01	903.008							1055.01	268.002	580.005		512.004		261.002
P08185	119084	121434	148568	128923	134019	83205.9	88668	90044.2	107093	74613.4	132380	107072	153204	133665	111253	122091	116216	123408	100689	125512	124248	75959.8	136531	99883.9	119636	115072	120816	107875	9175.94	98359.2	116781	91202.1	141609	115456	134388	82512.8	106162	67408.3	105878
P08195	1223.01	1147.01	812.008	920.008	905.007	487.004		712.007		651.005			1011.01	604.005	794.007		615.005	788.007		953.008	729.007		1168.01			1337.01	851.009			696.006	716.007	1008.01	818.007	427.004	793.009	1219.01	960.01		760.007
P08246	6842.05	5291.03	2441.02	1200.01	3220.02	1880.01	2647.02	529.003		2750.02	3762.03		1688.01	1241.01		1467.01	3978.03		2067.02	1423.01	1298.01	1328.01	4781.03	2481.02	2048.01		7159.06	4650.03				1717.01		1715.01	1389.01		1508.01	2797.02	1089.01
P08294	2577.85	16704.8	1676.34	1733.11	1923	1896.97	3034.01	2396.69	3056.7	1026.65	3139.5	2047.24	2763.59	3160.67	2186.36	4044.3	2860.62	2207.35	2401.15	2295.13	2969.88	3465.45	2455.56	3180.72	3166.59	3216.41	2464.92	3329.31	2253.48	3686.66	2620.06	3905.16	4143.69	1932.9	4563.64	4562.06	4323.94	2300.36	2213.77
P08519	16779.4	67569.5	24982.2	164849	30235.5	15639.5	9383.45	63536.2	17905	212919	46745.7	44765.5	56903.5	130379	18425.8	9519.9	16068.9	202429	38538.7	11061	22030.8	22589.5	20400.6	86630.6	52090	29093.9	135791	26853.8	16407.9	447286	41932.8	117379	74847.3	12399.5	105146	67253.8	52665.5	34825.4	15659.6
P08571	10559.2	12727.8	15473	17214.1	18157.1	12219.6	15537	9044.37	10974.8	7698.57	18069	13938.2	17571.5	13065.6	11645.2	12510.8	10146.1	15860.8	13914.6	13517.7	11375.4	13492.4	12230.8	13746.7	14029.7	12854.5	16497.8	12255	11069.2	12837	11490.9	8951.56	14314.6	11749.1	18279.6	11867.1	10078.9	9171.38	12206.6
P08603	304689	338950	453422	379907	450211	274393	277888	271966	303640	228627	460595	286896	385341	257289	327037	273718	243960	378373	271372	386751	269810	188458	357009	265181	335874	294445	314745	295069	13748.5	257749	197545	239757	337712	268563	356464	242764	222247	131397	299063
P08603	13485.1	22530.2	19526.1	17425.1	17878.1	19983.1	9487.06	19736.1	15745.1	16587.1	15797.1	18905.1	13776.1	14113.1	13522.1	18053.1	22520.1	25793.2	18663.1	16405.1	11995.1	9146.06	14790.1	13448.1	7730.06	18125.1	9762.07	11343.1	4561.03	8661.06	8380.05	10466.1	9377.06	9085.06	8117.06	7936.05		7850.06	12130.1
P08603	114832	120408	136919	134427	132719	95542.3	104058	94701	96844.3	75099.7	130362	88472	108318	60617.9	106180	102700	105091	114034	70782.4	128765	58622.9	73647.1	123724	96827	114237	88271.1	121047	104941		85240.5	56790.2	84233.2	113545	72292.5	123954	90452.4	74812.1	19744.8	111701
P08603	128298	171815	214973	208260	213884	152152	141573	111714	135112	102347	215409	125782	184282	126266	124127	127192	101218	158246	128987	132732	102942	96848.3	157824	122463	153419	133938	136482	137398	17524.9	116274	81693.9	100626	161549	135438	151898	115758	108409	55680.2	141362
P08637	5735.01	1825.94	3679.87	2808.9	8832.49	3436.59	6331.78	3272.89	2443.92	2061.93	5217.82	4675.84	6577.78	6150.06	2333.92	2016.93	2254.92	2608.91	1640.94	4952.68	6416.77	4479.84	4229.85	6938.76	9152.93	1786.94	5696.81	4793.83		5153.82	3411.88	2713.91	5715.81	3823.52	6851.97	3442.88	4954.83	5593.63	4760.08
P08670	1147.01	8261.07	844.007	320.002	595.005	734.006	1746.01		668.005	919.007	1353.01	1651.01		1692.01		1007.01			224.002	6356.05	2565.02	1109.01	953.008	4525.03	1148.01	2805.02	894.007	701.006	693.005			731.005	646.006	690.005	3302.02	403.004			1137.01
P08697	174258	206886	210425	191955	163051	166633	174138	114544	152956	102302	169788	166575	210881	140989	184948	176415	167411	179961	130148	214062	177159	157460	223355	170895	184542	159659	172285	163759	122238	150543	136481	130847	220914	198328	238479	132937	167319	99551.6	204025
P08709	4278.36	4449.64	6239.97	5069.44	3656.73	3012.89	6360.71	3221.96	3342.47	2866.46	6086.97	3467.46	4982.73	4878.03	4015.88	5165.19	3924.4	4953.54	4471.87	6590.95	3250.07	3396.43	5900.23	4836.75	6034.5	3834.58	4776.64	4967.21		4061.03	2988.89	3964.36	6040.85	3805.57	5792.63	2763.77	3362.06	2570.25	5099.97
P08779	851.346		1318.24	595.649		592.98	381.248		469.808		845.779			721.378	2407.26				229.959	216349		855.72	1176.67			2435.78		760.416		604.063	1153.98	32777.7		1153.14	1222.12	876.278		829.152
P09172	4050.33	9435.88	6907.97	3667.91	6650.6			5369.33	4733.66	1902.25	4867.25	3793.42	4407.25	4729.36	3638.16	5727.83	5412.54	4870.97		2953.05	5279.86	2465.61	6920.15	2890.83	3907.41	3560.49	3505.92	1828.22		4815.3	4075.94	1359.34	4551.31	6793.11	3366.76	2646.98	1564.31	4524.57	2670.5
P09486	7240.95	6961.13	10401.4	10073.1	9957.81	3030.57	11442.8	5568.86	5717.86	6337.92	8808.89	6417.61	10067.5	8058.84	6261.43	6765.26	8144.12	8495.33	6968.25	5833.94	6053.98	3979.18	10121.7	7276.26	7535.02	7492.39	6948.9	6454.46	998.572	7721.32	4605.42	5838.8	10650.3	6806.89	9476.3	5166.39	6877.17	6490.76	11467.5
P09871	169809	187340	252135	219717	213145	162028	182211	167552	155609	149648	282069	146012	195088	179946	177601	169461	182704	217273	167302	217791	151429	159807	225585	129843	190532	163009	188427	149092	21083.8	158455	128956	112474	193204	151726	235779	132556	154312	85026.4	140200
P09871	61174.4	68731.4	63769.4	95616.6	73483.4	49559.3	45828.2	46252.2	55601.3	47622.3	67339.4	51326.3	46557.2	48134.3	42042.2	58975.3	71589.4	75296.4	64447.4	61322.3	63254.4	65908.4	71532.4	9903.06	63663.4	45097.3	67076.4	58590.3	38172.2	49782.3	46393.3	26780.2	73842.4	54994.3	52682.3	35947.2	42244.2	36323.2	55816.3
P0C0L4	67081.6	58082	60143.3	58937.6	96714.9	13758.1	130397	27027.9	54356	18239.8	78040.6	129513	219590	51540.9	41602.6	58475.6	85541.3	119272	48343.4	107074	103834	90549.3	125164	128090	68035.5	33502.5	174173	99270.5	11238.5	98192.1	81180	49688	132152	64222.6	117692	79208	93310.1	19581.6	114895
P0C0L4	262203	265934	195483	382701	553702	241482	343057	196552	318804	204616	400866	531549	705051	260284	223171	444562	372413	538673	379098	432389	355167	374939	587742	547908	457075	239604	550506	327843	21940.7	432413	402175	335176	435212	478535	586990	360580	359443	183280	468511
P0C0L5	51046.6	86527.2	81439.2	102074	94525.3	82438.1	83452.4	79199.2	104216	84495.2	151109	116139	172099	90858.5	70937	97749.6	83281.8	170668	99355.4	170477	77295.3	70952.4	234006	100013	98449.9	126029	138441	57157.4	705.965	119682	74233.2	71323.1	101763	112266	202144	70275.5	88461.6	26721.6	104511
P0CG47	2634.18	3194.62	2844.47	2599.69	3757.92	1730.43	4437.16	1368.81	1526.19	2231.19	3805.77	2956.74	2218.56	3208.75	2798.95	2176.27	2349.59	2764	3116.1	14782	3256.47	3798.16	2247.66	3449.25	3709.07	2663.33	2900.2	2963.76	690.418	2493.14	2745.71	2224.68	4144.36	3010.14	3107.61	3291.79	2965.09	3306.34	2968.19
P0DJI8			2072.6	1813.14	12262.8	11739.6	2893.16	1925	1269.35	1538.89	7670.5		1051.94	1503.41	1236.27	2193.79	1209.26	4759.84	800.143					16209.1	2668.71			2086.59		1876.65	5754.82		1372.48		1292.53				1494.63
P0DJI8	9091.53	3371.61	5465.19	13500	75446.8	75792.2	9740.78	10628.6	6796.53	7045.09	16806.2	10553.4	14767.4	3898.92	4472.49	6061.39	6089.49	16407.3	4341.51	6013.41	3290.65	3384.75	4340.79	161164	5716.72	4088.16	7207.66	5713.89	1089.04	7430.51	18607.3	3301.01	14849.1	4128.05	6344.47	1835.47	4467.74	13460.8	8851.1
P0DOX2	24757.6	29132.9	32003.7	56297.5	24205.7	16418.8	20207	19236.8	38792.8	12832	31321.1	45630.7	50099.9	49024	39522.2	57439.6	38511.2	21498	55300	51430.5	26425.5	21570.1	18346.8	25182.7	51359.4	11082.6	16173.4	87595.7	10984.9	36822	24182.2	20875.8	75720.7	20198	20560.8	8722.09	25556.7	41572.6	66857.3
P0DOX3	5489.16	8337.83	8840.02	6757.39	9347.77	3734.5	7302.24	8551.43	6678.56	6851.31	7527.17	6669.11	3976.79	7691.2	6418.13	8281.77	13276.5	6189.11	4848.02	6056.91	9614.48	8541.63	6276.81	8341.84	15879.7	2821.75	10185.3	10143.1	2047.37	6177.74	7290.69	8063.8	7944.56	5705.45	5634.18	7325.78	7161.02	6603.59	8207.02
P0DOX5	209056	66088.7	62708.2	48222.8	236444	47375.8	214505	48925	48425.5	33885.2	60205.6	141922	191638	94840.8	68933.4	71813.7	41613.6	48653.4	40811.6	41749.1	256795	238196	65638	225082	215943	36752.3	212969	248915	1980.65	252282	288797	187016	255826	162240	402880	177162	221748	188989	217007
P0DOX7	223843	183232	133959	148703	229946	82663.1	254494	136996	159905	90963.5	230257	235660	291244	201749	145096	115619	142221	184131	65347.8	138208	268310	236888	226353	297385	399450	111341	273005	322731	4631.48	223184	258096	258982	311226	155446	337853	182950	245655	45706.9	230601
P0DOY2	2043560	2348680	2008540	1836440	2250170	2048640	2173150	2121610	2313840	1971510	4649470	2120260	4142730	2386220	1970240	3648540	2134200	2614040	2942230	3078220	2170330	1805070	3416920	1830690	2650190	1391160	2340930	1697860	2725910	2740000	3450580	2080470	2344440	1227210	3255110	2998270	1761030	2385500	2232970
P0DP01	2565.03	1670.02	1176.01	1317.02	913.01			936.011		206.002	944.011		717.008		1056.01	802.008	1095.01	1824.02	220.002	916.01	1380.01	2804.03	702.008	2011.02			1612.02	1401.02			1345.02	319.003	4623.05	434.004	4172.04	947.011	1372.01		898.009
P0DTE1		2359.02	1068.01	941.009	1374.01		2865.03	1807.02	1359.01	912.007	1436.01	1271.01	1773.02			1376.01	1438.01		1865.02	1498.01	1460.01	1101.01	2060.02	1485.01	1713.01			1474.01				3673.03	1831.02		2318.02	1526.01	1261.01		1284.01
P10412		3976.03	1256.01			1110.01	1892.02	842.006	842.006		1172.01	2066.01			1212.01		1510.01	857.006	1617.01	4684.03		855.006		3515.03		2574.02			648.004
P10599	3182.49	2735.62	2626.98	2640.37	2466.22	3723.98	3007.59	1326.73	1584.02	1908.26	2249.22	1892.97	2603.69	2362.71	2118.7	2275.3	1593.07	1831	1215.41	22687.3	909.039	5174.91	1835.48	2575.38	1903.2	2744.4	2784.37	1908.26	572.56	1852.31	2188.52	1701.31	2753.58	2768.1	2313.07	1571.65	1691.63	2295.8	1630.14
P10643	64231.9	71423.1	75291.5	113932	68272.5	86552.8	69559.9	82734	78525	51461.9	90942	69902.6	92801.8	99240.1	66891.2	55216.5	71757.6	84796.5	78403	78443.1	71019	74296.7	112266	79991.5	96390	85596.2	87168	70951.4	35627.6	77162.1	30856	64515.3	82034.8	73806.2	118791	84311.1	84513.3	77212.2	52039.2
P10720	11936.1	12623.1	13156.1	15234.1	17107.2	8148.08	13856.1	5354.05	7533.07	20885.2	10638.1	9881.1	14337.1	12088.1	11558.1	9732.1	14246.1	12761.1	9915.09	6786.06	10875.1	5880.06	17506.2	11717.1	11244.1	7405.07	12580.1	9608.09		10580.1	6072.06	17313.2	14210.1	11955.1	11584.1	5905.07	8773.09	7943.08	13120.1
P10809	1110.97	8994.48	421.244			1036.23	2208.3		784.813		2860.66	1548.52		1473.41		1176				8924.69	1250.99	800.474	1433.73	3890.38	603.893	5628.85	602.511		520.679	420.51					2946.13				1308.02
P10909	605358	605184	613618	653837	533867	508795	530655	537586	522896	442083	591364	558787	613054	485441	604094	498763	546760	649114	483778	533208	493695	461945	582256	483951	503391	488514	499177	515553	14153.9	443934	337156	386734	511685	561898	641731	422069	465238	249762	448664
P11021	3608.13	2786.14	2752.52	2584.19	3737.05	2324.09	2659.7	2326.4	2285.36	1690.67	2939.57	2548.86	2402.94	3232.54	2399.17	2831.32	2265.13	2763.76	2658.57	4099.42	1998.14	2067.24	2558.51	2629.01	1994.79	2264.58	2999.81	2683.8	237.225	2334.82	1546.6	2032.63	2047.26	2468.31	3175.41	2269.75	2172.58	1540.19	3087.03
P11021	4118.46	3420.4	2886.83	3436.56	4222.87	2876.13	3169.55	2736.41	2129.62	2080.6	3313.8	2584.09	2651.08	3370.71	2033.08	2779.76	3034.6	2362.62	3138.27	6115.29	2445.39	3028.13	2664.36	3041.74	2816.89	3396.31	4202.59	2638.44	620.539	2948.39	1693.7	2156.52	3568.75	2893.27	3654.41	2396.64	2081.57	1989.4	3556.83
P11142	2339.01	13177.1	1791.01	1650.01	1927.01		3458.02	1557.01	1766.01	1739.01	2618.02	2916.02		3084.02	1448.01	1870.01	965.006	1158.01		14726.7	2037.01	3275.02	2385.01	10538.4	2290.01	10367.8	1776.01	1880.01		1992.01		2220.02		1593.01	5636.03
P11226	33770.6	24350.6	10234.3	12473.5	69001.7	18978.7	8031.17	4273.09	6442.36	14338.9	47115.7	20041.6	22847.1	12443.8	2505.97	3721.69	5501.78	28185.9	25803.2	7003.5	22557.3	21699.6	12965.8	9626.74	12709.9	56183.9	28049.3	17343.1	1588.61	23170.3	9646.85	11767.2	7546.31	18827.9	12222.4	32556.4	10632	25025.1	4316.39
P11597	4713.08	5384.89	6552.73	7039.08	5251.38	4410.6	4783.19	3618.49	3732.38	4665.78	10712.7	6339.25	8316.96	5890.2	5578.34	5591.09	6400.25	6098.02	5188.7	7585.48	3859.2	4741.46	5237.68	3817.25	5936.56	7288.85	6540.79	4511.09		3101.53	3832.84	3196.14	5259.15	3794.82	8688.51	4235.74	4768.01	4634.71	4022.76
P12111	1721.25	1689.31	1212.64	1969.44	1664.26	1394.74	1641.36	1051.75	1666.7	924.835	2971.2	2095.44	1984.31	1863.68	1123.98	1748.39	1313.09	1575.66	1920.84	3105.52	1214.66	1508.56	1638.15	1841.49	1486.56	1530.84	1465.54	2037.12	397.126	1634.94	1663.44	1470.16	1607.12	1491.44	2308.3	2129.35	1515.75	1489.73	1057.39
P12259	18329.2	22930.1	25942.2	27326	25591.9	18134.4	19109.6	16833.8	13334	12238.4	24557.3	19706.3	24802.8	17509.2	22029.7	19509.8	19464.4	24438.7	17316	19955.3	17844.1	14088.8	25564	23233.7	17155.6	21558.3	23178.8	16393	11449.4	16616.4	15182.8	14399.7	20699.6	17989.2	27205.4	19007	15093.5	11219.9	17727.3
P12830	1926.66	1737.07	1281.03	1863.86	2018.08	1396.65	2477.06	1400.59	1665.97	911.093	1506.76	1338.14	1686.28	1464.77	1274.55	1266.77	1039.31	1529.38	1303.12	1032.67	1235.54	1940.42	1363.71	2248.73	2335.84	1751.88	1542	1770.34		1684.83	1591.83	840.471	2569.65	921.145	1275.66	1501.04	1371.56	1017.99	1816.46
P12955	1202.48	1435.15	1785.92	1710.44		1011.92	1605.83	986.936	1410.08	675.105	1440.5	894.016	1427.27	1445.46	1077.41	930.867	770.989	733.786			1647.65		1745.79	1347.12	1418.66	970.381	1307.68	1271.78	1705.39	1291.26	1372.18	1313.01	984.342	1161.97	2108.55	1030.84	1891.97	1325.1	1624.67
P13591	3022.73	3071.29	3286.89	3872.43	3942.61	2583.34	3059.91	3135.49	3807.42	2444.77	3598.36	3941.68	4569.2	2825.9	2485.82	3711.47	3342.13	2569.99	2685.81	3530	3213.82	2729.8	4784.44	4785.48	3527.35	2877.52	4367.2	2679.51	3007.12	3155.6	3950.41	3231.66	3931.35	3548.43	5227.69	4219.36	3018.15	2658.17	3782.89
P13598	1621.5	1949.83	1566.16	929.33	1633.4	1228.67	2058.72	1683.99	1673.14	1707.75	1660.07	1545.69	2162.53	1891.5	1043.67	1351.81	2122.41	1616.29	2240.77	2380.92	1760.23	5174.4	3576.88	2196.28	1926.4	1670.16	2267.18	2250.66		1797.77	1736.59	1610.89	2229.58	1244.33	3979.17	2155.53	1882.75	632.623	1968.01
P13645	26256.8	3682.58	3877.78	43321.1	7874.62	172832	6295.62	3344.84	11452.8	19240.9	28866	11516.4	15350.7	5363.46	55045.5	22126.7	11301.5	8181.28	5892.56	1042460	9116.34	197923	10851	9782.26	8828.17	65185	95127.8	2423.71	1811.02	4888.26	7127.52	14326.5	42878.7	28035.5	33613.9	27989.1	3184	41252.5	2968.13
P13645	5127.04	1180.01		7130.05		37929.3	1810.01		1961.02	4236.03	6158.05	2733.02	2433.02	1429.01	10560.1	3820.03	3095.02	1701.01	1154.01	175064	1505.01	52764.4	1928.01	2118.02	1962.01	10097.1	21653.2			1483.01	1892.02	3151.02	9921.07	6960.06	6730.05	5598.04	1505.01	11838.1	1399.01
P13647	3450.98		2096.93	6136.26	2027.68	11862.4	2440.14	2503.2	2606.11	2386.67	3046.7	1461.49	3207.68	2702.86	5351.29	3280.09	2725.44			368492	2526.25	14640.3	1964.95	2900.54	7852.53	3802.3	7994.98				1942.24	3993.11	3102.14	3562.38	5161.68	3656.86		5469.66	9370.12
P13671	51825.2	52020.3	61565	66763.5	41484.1	53657.6	46118	44365	47183.8	39470.5	68438	51083.5	69982.8	55058.7	55036.1	58674.4	57949.7	68318.1	60451.3	56861.3	50843.1	42157.4	56500.6	76348.2	51307.2	44448.1	63035	54183.9	13497.5	58527.5	45140	48641.4	72677.6	61149.3	72682.3	46757.7	39652.4	37310.7	57208.4
P13727	2406.02	2284.02	3127.02	1763.01	947.008	1161.01	2102.02	1824.02	2568.02	1378.01	2786.02	1948.01	2264.02	1435.01	1835.01	1280.01	2441.02	1325.01	1311.01	3857.03	1487.01	1767.01	2360.02	2535.02		1371.01	2213.02	2680.02		1830.02	2691.02	1558.01	1625.01		2896.02	2676.02	2400.02	2641.02	1287.01
P13796	4121.81	4075.8	3643.71	4576.09	4954.43	2733.97	5684.46	3226.86	3931.04	2804.44	5067.77	4405.11	5312.98	4247.34	3366.46	5062.57	3648.52	4374.48	3918.49	4492.88	3487.15	3663.61	5140.1	3872.83	4095.27	4147.01	5365.98	3766.54	4561.64	3151.46	3817.34	3146.62	3557.29	3715.96	5269.16	3768.61	2918.74	2096.81	4069.46
P14151	7776.5	9455.56	8811.75	7492.48	12129	6759.58	7200.28	5714.94	6389.75	7865.33	10822.3	8552.36	11589.9	10982.6	7678.36	8586.96	8512.59	8444.56	8587.22	9557.05	8584.89	12889.7	11149	10431.5	10970.7	8913.52	12687.6	16433.4		12131.9	9941.12	9889.11	10681.9	7023.85	11405.7	6243.73	10913.4	9446.06	8274.93
P14543	2320.02	1865.01	1431.01	2490.02	2695.02	864.007	1885.01	2198.02	1506.01	1674.01	1736.01	1722.01	2253.02	1987.02	1913.01	2179.02	2053.02	1527.01	2097.02	2136.01	1755.01	2201.01	2058.02	1901.02	2259.01	1893.01	2109.02	1675.01		1598.01	1597.01	1890.01	1801.01	2187.02		2029.01	1196.01	1373.01	2327.02
P14618	984.906	3827.91	1041.85	929.73	1493.54	990.258	2146.46	768.929	504.83	1014.09	1357.45	1592.49	1285.83	1616.59	1595.17	1522.18	1232.2	1036.3	1287.91	5243.23	957.43	1682.31	1276.99	2534.67	1051.12	2047.51	1791.61	1203.54	1131.57	897.991	1322.94	1308.86	1757.55	1426.42	2595.18	1386.62	1477.36	1755.96	1432.78
P14625	2575.26	2626.52	2813.83	1787.67	2375.8	1448.41	2243.58	1506.36	1937.73	1419.45	2339.04		2466.22	2536.4	1603.31	3900.72	1444.68	2142.79		2437.56	1862.24	3044.83	4032.08	1580.84	3835.39	2488.79	2406.56	2583.72			1340.76		1291.83	2472.73	2211.76	2866.01	2687.1	1341.22
P14735	11322.5	7673.34	11068.4	7017.23	10737.1	10092.9	10269.1	5944.95	8865.66	5670.47	10158.9	7142.1	10290.7	9012.89	7164.06	9043.83	7546.75	9908.6	9967.99	10007.3	7188.92	12421.6	8500.16	14978.1	8820.71	9551.78	13593.5	14263.7		10881.8	9551.54	9034.55	15250.3	6249.1	12816.8	7967.91	9905.2	8343.39	14312.1
P14780		594.004	733.005	410.003	911.006	895.007	605.004			577.005	507.004			221.002	177.001			545.005	267.002		548.004		822.007	1069.01	444.003		780.006	691.005		518.004		162.001					536.004	319.002
P15144	1116.53				4433.46	301.328	798.155	353.573			645.506	934.916	840.894								666.991	1439.09	377.41	1274.4	1199.6		1527.56	1381.09		1246.81	1167.15	903.609	1454.87	1123.19	1550.29	1482.87	1032.13	963.8	1096.15
P15169	42419.4	41889.6	67858.5	55965.7	49446.8	31314.1	39362.4	41452.9	40131.9	33089.6	56909.4	44755.8	57696.3	40117.5	47764.3	50271.5	37820.2	57689.8	46028.6	64980	41773.3	29369.3	55570.2	48841.1	45340	42738.6	52133.4	43888.7	23701.3	49838.9	38883.1	37573	56814.3	52824.5	63651.7	31743.6	30818.9	34635.2	44932.1
P15814	6925.07	12131.1	12825.1	6723.07	10157.1	2215.03	19202.2	16969.2	16294.2	5929.06	18340.2	9682.11	10945.1	8176.08	9797.11	6904.08	10460.1	13684.1	5978.07	11005.1	8469.08	6247.07	25439.3	25882.3		7369.07	14214.2	6424.08		5981.06	6759.07	14541.2	20941.2	3221.03	16307.2	4212.04	4204.04	615.006	12565.1
P15924	1682.1		2853.19	908.279		1441.18	1887.33			607.047			1578.32		1253.11	2151.84	978.4			28193.4	762.487	3102.32				1157.9	1866.93					733.399		1483.34	1591.42			1034.62
P16070	8841.06	4834.96	6679.15	4885.11	7655.61	3866.62	7626.39	5026.07	5063.45	4608.89	10220.8	6080.96	8494.32	7010.52	4430.44	5769.2	4254.06	4852.77	5725.57	7848.5	5942.22	6606	8166.49	6369.14	8902.64	6144.46	7949.48	7127.36	2322.25	5964.29	6296.09	5105.4	7170.81	4086.21	8296.32	6889.49	7475.42	4860.1	4430.27
P17936	18960.2	22377.9	22723.8	30041.8	13607.3	7547.25	20812.3	17832.4	19576.9	22577.3	23732.5	20285.9	25921.5	21729.4	23571.1	22692.5	20468.3	26005.2	24996.5	25613	22627.3	16593.9	27630.8	18217	15202.2	17563.7	23427.6	22499.3	7683.65	17368.5	12946.4	14671.8	25844.1	19659.3	27333.8	15561.9	12738.8	14892.7	24086.5
P18065	3062.78	2158.58	2605.51	3053.43	5391.58	5287.36	4095.46	3250.35	4681.94	663.968	8486.81	4164.12	4865.81	6495.49	1708.42	1311.94	3477.69	2527.79	2985.53	2629.1	2163.43	7470.76	2006.21	3014.05	3839.78	7120.02	5294.64	1961.91		4316.53	3942.55	1520.93	2746.7	1408.93	7578.76	6107.51	4466.36	4810.51	1277.94
P18206	1278.44	1571.81	1686.57	1858.46	2460.13	916.686	3237.56	1233.59	1605.62	685.467	2966.42	1773.34	2005.33	2983.19	901.338	2385.77	2107.09	1594	958.908	3116.44	1435.98	5759.74	1978.03	1959.07	2613.99	2477.34	3035.34	1874.03		2334.09	2400.92	2519.74		1405.68	2801.39	1757.2		1783.52
P18428	9278.4	13495.4	24429.5	15479.9	33872.1	13785.5	19366.4	8581.3	15473.6	11077.2	17691.6	12210.3	16165	9164.5	14002	11805.9	10801.8	21246.9	11849.7	11723.2	6755.43	11147.8	13691.3	22936.5	19299.3	6981.31	13938	11729.2		10829.8	9589.46	6737.3	13605.1	13423.6	15993.4	15551	11580.9	7537.5	10682.6
P19320	3589.01	3128.66	3010.25	3688.42	4863.67	3653.56	4257.84	2717.38	4872.08	2622.99	6402.31	4130	4256.11	4430.55	2787.21	3624.73	2908.58	3439.63	3719.56	4984.77	3127.79	6089.71	2557.65	4148.7	4964.11	4425.33	4234.59	4153.06		4079.2	4843.98	4158.06	3336.93	3367.13	6111.8	4757.11	4220.52	5010.98	3121.37
P19338	519.03	3053.23			852.079	370.555	564.715		539.335		284.261	880.136		784.76		694.156				2979.86	553.372		501.264	2197.5		1565.14			215.263						1053.98
P19652	652391	554826	857756	562488	657199	315870	620582	442431	493356	221462	793556	570612	850634	497270	684945	343253	644107	798271	563302	911921	610576	515970	713810	797511	704758	205129	692554	645434	897.862	574809	384172	381331	731795	570641	794526	438208	474895	195851	697525
P19823	507063	598436	610735	626955	366847	432109	465458	487536	469685	412890	755153	540715	715570	515072	615358	572154	568874	565284	504401	691919	459383	359674	715726	514665	473814	577210	575319	532784	135214	479026	378835	485728	633942	619038	584670	428429	425168	268340	581010
P19827	215959	325618	385782	337374	179740	179574	264602	258770	219489	177577	453828	273306	395882	239254	301989	244834	288073	312629	214040	401213	226649	143115	417048	256395	221060	246104	275867	257244	2874.27	221311	168052	213610	317531	238700	200490	173451	187567	89419.5	266495
P20742	8262.97	4632.45	11482.7	9521.56	12505.1	6108.64	15179.6	17082.3	6821.82	7773.52	26524.2	35976.7	46945.2	2398.71	15571.5	31564.2	83401.3	63377.6	15288.4	27015	31276.6	31494.3	5108.14	22899.7		5197.48	58278	79121	8761.16	48005.7	19527.9	57937.9	54312.4	94818.6	33286	10632.6	9718.68	7401.07	8132.15
P20851	63214	67944.4	98746.7	81023.9	53677.9	52567	53280.5	57566.9	48514.6	44357.4	83457.8	61847.6	82570.8	63998.3	72131.2	55093.1	57171.4	89898.8	67211.6	95914.9	56604.9	37239.3	83067	68087.9	68005.5	41649.9	79338.3	65069.8	6086.5	78174.8	44340.2	51525.1	91544.4	72156.4	101365	46929.3	55089	30139.4	80048.3
P21333		970.839	3055.98			254.665	1203.42	361.468	137.255		920.115			635.74		611.941		756.505	769.917	2084.48	678.766			1187.24		1316.29	999.41	1083.81	267.246						1002.99				865.76
P22105	4943.11	4929.85	6868.52	5380.72	4331.2	2744.4	7858.02	3167.33	4158.46	2428.6	9143	4166.54	5508.74	4892.56	7368.83	5225.81	4337.12	3892.51	3567.23	4978.69	3561.16	3963.07	3969.63	3639.29	4112.01	5870.76	4349.82	4435.16		4477.41	3808.54	3440.29	7317.33	2796.77	5616.06	6966.4	3948.93	3821.5	4088.28
P22352	33363.2	40325.7	45467.5	46605.8	38370.7	41804.9	26441	39964.9	42580.6	25076.9	39668.9	28097.6	47575.1	42762.4	33128.5	31148.8	32924.2	39942.2	27253.4	34443	29760.3	22597.6	54161.4	29035.4	33329	35679.2	33716.4	28492		35417.7	31437.2	24909.8	32781.3	29518.5	55614.4	33015.2	42709.9	14951	29757.5
P22455	52574.3	26027.1	74435.4	36777.2	58089.3	38850.2	37517.2	14716.1	9115.05	18428.1	39744.2	58315.3	51072.3	13850.1	37680.2	25353.2	23811.1	54257.3	87205.5	17545.1	18771.1	26335.1	39383.2	62539.4	15082.1	37803.2	44968.2	45355.2	2863.02	59485.3	73414.3	40882.2	49704.3	10148.1	46502.3	51278.3	26854.1	27419.2	40011.2
P22692	1524.01	1295.01	1508.01	1952.01	1644.01	1200.01	2363.01	920.005	1913.01	1819.01	2164.01	862.005	1041.01	1951.01	1422.01	2557.01	1030.01	1419.01	1961.01	2720.02	1221.01	1473.01	2111.01	1590.01	2040.01		1691.01	1418.01		924.005	1459.01	890.005	2420.01		1691.01	994.006	1386.01		989.006
P22792	73013.9	64170.9	106207	73416.8	76335.9	48722.6	79479.5	61061.7	59555.1	51272.1	94625.5	63689.8	97766.2	60426.7	73270.6	77066.7	55768.5	96212.7	68714.4	88626.7	73683.4	40257.8	96477.7	75919.1	73569.5	68072.7	88656.6	79286.5	7523.1	78806.1	54842.1	65675.9	100750	79718.1	91704.9	51296.5	48279.5	48286.8	76723.1
P22891	14653	16288.8	35398.1	25262.9	16631.2	21262	17214.2	16449.3	8765.61	9921.78	26136.3	10417.9	15413.4	15715.5	16614.8	17911.9	21612.2	18817.6	15394.9	23074.2	5431.75	11628.6	22599.9	15634.9	10727.6	19394.7	14473.6	17673.5		12417.2	12666.7	12626.4	10923.9	15609.4	22391	6310.38	18724.6	6401.98	24033.3
P23142	36688.2	42546.5	34653.5	57723	41497.4	34716	48441.1	35212.6	62061.5	49244.1	91233.3	47367.3	63857.3	45602.9	38824.4	63466.5	34186.6	44250.5	35682.4	47285.6	36057.3	37378.2	45225.3	36508.8	49383.9	61951.3	41526.5	37776.7	4216.28	43970.6	39285.4	37810.5	52914.7	32093.9	55319.1	46509.6	45633.4	37825.6	28269.5
P23470	1873.68	1478.31	1058.52	1389.62	2086.22	1110.4	958.207	1260.82	1516.91	1072.35	2771.77	1379.87	908.084	1650.89	920.598	1641.88	1333.58	1324.73	1399.31	1245.46	1162.42	1438	2431.29	1345.67	1270.08	2373.99	1950.99	1247.71		1272.3	1658.75	1242.23		1158.55	1024.08	1495.2	1476.58	548.125	660.742
P23528	1288.01	13461.1		289.002			3040.02		260.002		643.005	2557.02		1972.02		1103.01			305.003	11771.1	1351.01	1016.01		6906.05	793.008	6196.05			1027.01						4998.04
P24592	2048.7	1957.9	2249.18	1902.08	1657.4	1240.53	3495.16	1729.15	1601.44	1312	2700.01	1152.31	1734.08	1615.85	2067.05	1687.77	1010.02	1502.52	1608.43	2040.83	872.854	1354.69	2600.66	1956.35	2897.05	1428.76	1686.46	1286.15		1391.77	1211.05	786.445	2468.25	830.656	1469.75	1454.74	2673.8	1307.96	892.288
P25311	59612.5	20007.2	19426.9	21021.4	44026.9	19637.2	44751.2	15316	17048.2	17549.5	26537.3	32842.9	39134.6	20320.4	27043.7	16687.5	18971.4	22591.8	21594.6	17041.8	36928.9	44058.3	26103.2	60030.1	55820.3	23981.1	62726.9	48015.4	16264.8	48648.4	57574.5	34888.1	60404	48273	69553	48236.5	48845.5	32427.3	53863.1
P26927	7449.66	9840.99	14111.6	12561.2	12740.3	9199.92	11744.9	8976.82	9256.21	6584.56	6307.97	9503.81	11704.4	9878.96	9774.25	9975.45	10651.5	10670.4	10157.2	10068.1	6869.27	8889.65	13362.8	10921.4	12440	9763.84	10795	11099.5	1917.6	7990.06	9300.37	8528.68	10835.2	10743.5	15082.8	6557.44	9469.8	5696.09	13275.3
P27169	218677	148857	224851	282384	142476	146657	189758	114217	181462	158729	212747	207278	286472	240094	181379	236932	171414	208654	169875	179226	236968	119767	308929	164692	192808	247143	176969	175113	1517.64	171269	191917	210909	205180	171983	251891	147919	129799	95805.3	232179
P27348	527.003	4619.03	1324.01	588.005	1034.01	433.003	945.006	337.003		397.003	1755.01	728.006		2025.01	246.002	886.006	522.004	837.006	561.004	4546.03	917.006	1139.01	730.004	2183.02	1413.01	2821.02	605.004	815.006	159.001	868.006		683.005	462.003	310.002	1179.01	527.004	483.003	225.002	669.004
P27918	17859	14617.5	19722.7	16405.4	14653.2	17772.7	16517.4	13443.7	10410.6	14447.2	26633.8	14249.9	15582.2	15392.5	14071.2	18281	15742.8	21509.2	18281.4	21938.8	15292.6	14852.7	21052.3	16853.3	14294.2	14050.4	19752.4	15844.8	11024.5	16998.1	11827.7	13086.7	17089.7	15437.2	22245.2	12922.7	12876	10451.9	16866.9
P29622	70025.3	81047.4	94357.5	99750.7	69003.5	62958.5	69054.5	54068.7	70528.9	55837.8	74571.8	71034.6	89513.4	63471.6	90367.4	72872.6	79404.1	73911.5	76107.4	94808.4	61251.5	71859.4	121700	57991.4	75999.8	72007.8	78559.8	66286.7	4769.53	66489.2	47097.3	58544.5	97008.4	77810.4	99701	60175.1	67842.4	39114.7	89143.1
P30101	714.407	4447.07				327.798	837.813		1626.37	394.322	1190.68	1154.04		1348.79		725.012			1665	4234.14	1231.27	438.671		1686.07	1945.55	1740.18		225.602	479.163	369.254					1995.72	249.704
P32119	1802.08	7195.68	2901.26	2546.36	4724.43	6278.92	4553.99	2601.97	2367.6	2627.12	3110.7	3553.18	4468.75	5097.56	2465.04	3592.17	3073.36	3042.31	2461.57	10537.5	4061.11	11127.6	5575.96	2987.43	6419.26	3914.55	2287.9	2731.72		1537.82	4405.29	3330.01	14008.8	3774.45	4362.35	2923.95	5368.41	1985.34	4396.9
P32119	1559.01	4162.03	2543.02	2029.02	3790.03	5423.04	3709.03	1288.01	1778.01	2144.02	2288.02	2601.02	3107.02	4340.04	2097.02	3466.03	2162.02	1816.01	2109.01	14716.1	3006.03	9944.08	5916.04	1903.01	4364.03	2859.02	1903.01	1679.01			4420.03	3237.02	9362.07	4263.03	5013.04	2522.02	6831.05	2718.02	3661.03
P33151	7106.49	11528	6944.06	7504.6	9768.45	5225.82	6505.68	6665.76	9872.79	6586.48	21904.8	6256.29	7624.42	9773.72	6589.49	6829.79	5753.55	9071.41	8010.87	11371.7	7098.84	6344.52	7877.8	9000.98	8298.24	15419.1	6317.71	9642.16	8137.5	9949.49	6514.6	5965.11	7964.93	5573.15	11169.2	5890.17	5459.81	5755.67	6597.95
P33908	3781.49	4017.92	5890.08	4757.81	4497.24	3029.08	4852.43	2908.31	3004.92	3256.27	6420.92	4493.01	6446.38	5677.27	2402.47	4190.4	4411.17	4814.68	3682.28	5571.04	3699.85	3920.23	5410.54	6065.87	4241.14	3869.45	4598.61	3966		4120.56	4154.63	3653.22	3980.28	4499.24	5284.05	3529.51	3558.4	2022.55	4230.63
P34096	1004.83	1138.83	1583.64	1787.13	2128.09	982.983	1556.2	1013.89	1130.13	880.195	1184.21	1106.96	1666.37	1369.33	1141.34	1309.03	803.68	1053.02	1215.42	1277.13	956.406	965.918	1055.09	870.709	1675.08	634.545	1353.11	836.337	581.598	1035.08	796.464	924.22	1320.34	571.108	1755.13	1658.23	1284.31	799.074	1134.23
P35443	1861.78	2914.29	1689.6	2779.67	2046.08	1443.81	3755.1	2036.83	3073.22	2285.54	10912.6	2911.28	4143.35	2689.58	2845.35	2948.22	2191.07	2903.54	1114.12	2259.71	2314.26	1688.31	3421.1	1310.19	2628.76	4735.28	3062.9	2620.82		2670.94	2861.52	2529.66	2353	2346.44	5016.41	2975.35	2558.71	2064.9	1964.6
P35443	34148.4	35001.5	48666.8	40868.2	28099.1	23152.1	65998	29369.5	25109.8	12350.8	173767	46280.5	62489.5	28134.5	29601.4	34692.9	25409.7	34311.5	17614.5	46065.6	41731.9	48463.6	46095.9	49388.8	58541.3	36042.7	60614.3	49445		41688.8	37416.8	39794.5	50564.9	28269.2	66784.8	45405.7	45388.2	37676	41407.6
P35527	35562.4	6300.64	11807.1	53052.6	10962.9	50521.9	7771.91	23195.1	14160.1	17516.8	15496.8	7647.85	9325.54	12476.5	49243.4	33697.3	19807.7	6172.36	8010.46	1261500	25180.7	20705.9	17509.7	10715	11273.1	7876.58	19927.4	4516.98	2754.38	5080.93	9524.54	38463.7	25738.4	15472.7	79645.4	21310	2699.77	17961.2	6843.37
P35542	204687	206192	281625	287836	239187	198730	152118	249616	188793	195529	271026	184153	253370	237916	242057	145100	278977	254088	195882	221854	189398	162602	323998	328340	224136	149034	181691	162929	10428.2	182484	143414	144730	291907	210236	281563	154543	174228	165569	265540
P35858	38211.8	44633	51602.6	47859.7	26363.6	7295.77	45871.4	32930.9	29839.9	29489.7	38648.7	40900.3	51468	33306.2	51287.2	39621	34469.8	52719	38881.1	40755.4	42511.9	31728.1	57126	39438.2	23181.2	34380.5	41114.5	49429.9		37310.4	28878.2	31294.1	56840.3	41360.8	62275.5	30903.3	23936.8	22893.2	50418.6
P35908	16145.4	2951.53	3216.02	17900.2	6102.83	130723	3793.84	3541.62	5960.51	10334.3	24389.7	8241.02	9249.05	3180.11	29331.5	11247	5703.76	4852.44	3491.3	94376	3644.39	71038.8	5637.86	6976.44	5299.95	32725.1	56322.9	2212.54	1068.78	3851.34	3435.85	7952.11	26653.6	13654.6	10334	12695	1995.76	11155.7	2478.14
P36955	72544.3	70034.2	62620.5	74036.3	74595.8	52323.7	75861.6	50683	45367.7	51482.3	81887.6	49023.1	62781.6	58982.9	60300.1	53953.3	48829	50993.5	60062.4	74872.2	47382.8	60848.6	77697.2	62998.7	93213.9	66802.3	63971.8	67480.9	2290.64	56547.6	61357.2	38396	81355.2	58561.3	70694.1	51148.5	64306.9	31296.9	82383.5
P36980	6728.24	3062.38	7078.5	15726.6	22366.3	5324.13	14868	9279.51	3262.92	3002.44	27539.3	12543.5	18155	12733.4	12407.3	4565.12	10172.6	5292.59	4296.39	12101	16538.7	6791.12	6576.05	8140.75	9809.31	5690.06	9589.51	13535.6	2074.59	7521.51	14113.6	3379	9549.75	13294.9	16852.2	5332.76	6278.17	7446.01	13665.9
P36980	28515.3	24493.6	45579.2	42140.5	42898.9	29904.9	34560.4	12471.7	25641.2	24492.7	28028.9	31480.8	34073.2	42109.7	19548.8	32808.6	20521.3	30720	25899	17602.7	23855.3	18338.4	27344.2	34403.6	24319.9	23199.3	27061.8	25802.1	1674.89	19324.4	27254.4	16775.9	33831.9	29414	15370.7	18807.1	22022.8	9248.37	33356
P37802		1453.42	4835.99	2041.07	1735.77	152.383	1714.09	618.052		642.745	2514.45			1940.1		770.435	1334.03	3222.25	1367.24	1576.44	821.755	855.853		939.854	662.477	1019.36	1926.22	1700.36							1287.26			742.821
P39060	1312.28	1401.73	1758.31	827.679	2234.73	1640.08	1937.34	1321.18	1396.3	1068.62	2769.69	1747.16	1749.03	1210.01	1087.45	1476.18	1536.76	1214.26	1639.92	1164.77	772.117	1139.64	957.707	1535.19	2438.38	1039.86	1472.28	1671.08		1722.42	2074.77	2502.23	3093.56	1080.96	1817.98	1299.26	1572.46		956.925
P40197	2447.94	2811.69	3363.55	3969.09	2904.81	558.28	3284.34	1412.1	1828.47	2140.33	2730.46	3650.65	4242.8	2999.61	3000.08	2976.4	2904.22	3776.19	3022.8	3258.01	2616.33	1963.24	3708.01	2540.68	3499.96	2612.95	3610.18	3112.98	3124.41	1931.44	1916.52	1979.27	3895.06	2645.53	3514.78	1220.42	2200.69	1303.82	4068.82
P41222	4177.59	2960.77	4008.34	3077.5	2850.45	862.165	3884.78	2105.96	3353.52	1539.73	8149.7	2539.93	4647.47	2842.29	3025.42	1747.55	2820.24	3342.11	2549.04	4496.18	2492.5	2949.87	3821.94	5041.86	8521.68	3565.8	2811.01	3814.74		2728.52	3346.78	1239.02	4175.53	1461	4963.64	3448.21	2981.86	926.203	2376.57
P43121	3060.48	2392.57	2853.4	2981.6	2970.88	1911.07	2919.8	3419.63	3228.29	1973.78	6199.06	2982.42	3251.66	3679.23	2250.21	3169.2	2350.78	1864.91	2370.44	2608.87	2431.58	3453.65	3206.61	3588.53	3458.01	3384.43	3719.47	3205.85	2164.7	4424.95	3214.19	3555.33	3584.01	2791.85	4469.68	4320.85	3594.77	3194.47	2181.95
P43251	21531.3	22373.2	22758.7	31307.7	19805	14069.2	15422.4	17706.1	15709.6	12809.5	9623.16	17835.3	23917.1	18462	18708.5	20078.4	18943.7	19268.7	14692	25008.2	19975	15374.9	28930.4	19082.8	20373.1	16415.1	19933.8	19899.5	765.875	15081	16260.7	14470.3	27175.9	21659.9	25701	15343	16235.9	14703.8	26341.1
P43652	169080	252030	203347	207813	171841	151802	167121	133287	138859	154845	155258	123816	166981	151122	186145	162697	165513	215682	161586	247887	81105.3	127296	234996	121210	214827	173515	158743	164426	65155.7	153113	109084	156696	212236	223571	170828	121938	178368	123785	183840
P48740	10194.6	9491.88	10305.1	11559.6	11036.8	6963.8	10171.8	7623.73	6477.61	5839.08	13004.3	9514.76	13036.7	8929.63	8420.7	8948.27	6842.83	5850.97	8826.21	7255.4	9134.14	10816.7	11182.1	10394.2	11803.8	10866	11031.2	9545.69	657.346	8095.51	8302.19	6647.56	11109.5	7544.56	11342.9	8402.42	8137.92	5272.03	12008.2
P49747	4270.03	5653.09	4653.3	6737.01	4393.08	3588.24	5712.94	5854.58	5395.53	4511.74	13160.2	6707.6	8213.43	6193.64	5242.79	7413.79	5640.18	5693.21	5381.74	6277.18	5733.76	4753.13	6475.04	6795.91	6912.3	5502.8	8043.42	4818.83	3235.17	5292.96	4120.35	4981.68	4556.74	5061.74	7632.26	6469.76	5542.06	4473.29	4704.93
P49908	45269.5	45895.7	45705.9	52338.7	30944.7	40975.1	38015	40409	33340.2	30603.4	47446.2	27929.9	35183.3	47660.2	35941.7	36027.5	36570.8	43620.2	34957.6	23648.4	27102.3	26926.2	45002.9	32926	34721.5	46269.3	34609.2	29022.1	3374.72	34815.1	32063	21862.4	36664.3	33515.2	41638.7	27693.6	46230.8	20460.7	42831.3
P49913	16707.9	5403.71	10976.7	8164.05	14401	4987.88	19800.6	7411.1	4287.61	6837.76	6447.63	4701.93	6780.32	6231.04	8741.2	5934.64	5228.95	8313.67	7542.51	11381.6	8613.27	9806.2	9570.45	11296.4	16585.8	6801.38	8529.43	12084.5	1089.78	7575.42	6785.39	6733.45	14587.6	6288.17	9832.24	4560.55	14354.2	4261.23	13752.2
P51884	62779.7	71317.7	55667.2	65059	45108.6	32681.6	62264.1	46892.1	66576.7	46699.8	156608	56548.1	80688.8	61220	55268.7	54333.1	51934.7	59556.2	47731.1	72069.8	51291.5	49609.3	70302.6	35138.2	67342.3	79087.1	55891.3	46730.6	5281.59	53444.5	49077.4	35551.2	78355	49980	57183.1	59628.9	53187.2	28223.6	40503.8
P54108	7412.25	2818.37	3304.7	3734.42	8383.16	2404.37	7744.24	3418.94	4017.41	3162.15	2477.74	5393.58	12134.6	5320.22	2549.01	4080.3	2359.3	2617.14	3513.27	4219.7	5283.53	8184.21	4481.72	8597.66	10751.7	2778.55	9273.59	10091.9	691.753	6728.42	7182.82	9409.15	10828.5	6603.68	13052.8	6028.74	9230.34	5620.5	5213.25
P54253	146187	561103	703918	503047	89585.6	288229	150827	395522	611037	320326	449167	323935	681004	359575	498516	651501	522979	523975	735725	615535	214530	91969.5	724335	104956	77474.4	629533	107622	90366.5	129918	85597.5	303334	182218	140888	85071.5	107982	145462	100654	50212.3	76991.4
P55056	72849.4	60963.5	76071.4	36872.7	24708.3	23580.8	87164.1	26633.8	13716.9	33169.6	45229.9	30718.1	44316	40565.3	96220	20581.7	58040.6	50420.4	69544.7	67654.1	52703.9	41258.9	89846.3	76073.2	65502.9	28266.2	42700.5	44594.7	20331.4	25030.1	17164.6	41076.8	131202	24279.5	45727.8	12847.5	54415.8	18284.5	89420.5
P55058	14563.1	18758.9	21836.6	17771.7	24791.9	12904.7	16391	18485.8	16685.1	11574.2	26119.2	19073.5	26932.9	20974.7	17380.1	15736.8	17071	19295.5	14507.4	17380	19395.9	16123.2	26760.8	17856.3	19053.6	23943.9	20444.3	16876.2	2764.69	20425.2	16386.7	13658.2	23097.5	15894.6	26681.6	17643	15036.1	16531.8	17466.6
P55103	2394.23	3173.58	3187.56	4088.12	1871.17	1768.94	4039.35	2848.41	2916.28	1960.45	3144.5	2165.21	3836.48	2603.86	2922.49	4076.01	2133.78	2996.94	2397.16	3573.18	2844.46	2118.61	2936.71	3922.21	3187.65	1918.11	3782.94	3883.53		3050.41	1426.72	2598.61	6102.37	3716.98	4257.54	2676.85	2541.79	2543.07	3968.57
P55290	1810.26	2386.75	1813.25	2867.55	2243.14	1137.88	1839.76	1706.35	2471.31	1245.46	3759.51	2113.38	2964.16	2436.8	1900.03	2592.03	1754.73	1629.39	2958.29	2379	2602.25	1669.35	3334.26	2579.67	1935.03	2965.65	2584.61	2108.76	43.9436	2453.38	1536.88	2354.72	2667.72	1428.98	3500.73	2857.74	1638.03	1548.43	1618.37
P55774	465.074	1097.6	1457.24	734.543	794.321	424.869	1550.29		960.103	454.65	1743.57	455.294	810.62			721.249		1144.12	486.571	822.757	738.435	397.704	522.959		1154.38	110.835	1067.06	523.752				471.847			819.313		507.282		900.341
P59665	9420.13	5304.05	2985.24	2243.03	32361.8	2335.55	15806.2	1788.51	3040.72		2228.9	4523.23	5287.97	4244.53	2723.85	3790.43	2046.61		2389.45	1527.08	8279.84	43546.2	2396.33	10335.6	12069.9	2819.99	13298.2	16892.2	972.176	6909.21	8523.83	8387.65	9021.38	11894.5	12481.2	7048.65	11766	21295.5	14622
P60709	10480.3	17481.6	16795.6	11909.8	15778.1	6613.85	11094.6	7490.59	6111.42	6400.35	21355.5	8384.87	10383	14857.6	7286.21	11152.7	11440.8	11028.3	8515.16	15517.8	7177.68	17199.3	9606.15	8431.22	8906.67	9695.85	13574.7	10099.1	2537.24	7895.68	4200.44	6217.53	8255.41	6115.4	13366.4	7214.81	7999.58	10345	9374.67
P61626	10795.1	11106.4	14855.9	14014.2	17153.9	12390.8	21016.4	8856.32	11115.2	10186.4	13291.7	10208.2	16398.9	12207.3	9306.02	13029.7	6270.13	9206.88	11613.3	16136.6	9566.48	13280.7	14684.7	10158	20130.9	9944.68	10037.3	11984.9	1538.04	9944.46	11395.3	8834.75	17495.2	9796.18	15254.7	11311.6	17508.1	10262.1	9359.8
P61769	12672	11859.8	11747.1	13636.9	19501.5	11371.1	25365.3	11396.5	14134.2	8009.82	20736.2	11521.9	14921.5	12981.7	10643.6	13620.7	10153	9077.52	14619.5	15505.1	7012.78	16333.3	13874.3	10743.9	21495.3	10872.7	15121	11711.5	2599.55	9800.79	13588	8487.1	15544.9	9374.26	15790.1	13216.3	11862.8	8305.66	6396.9
P62805	3518.23	9641.48	4981.07	3998.91	5313.11	3163.45	6653.83	3381.63	2284.55	2829.54	3403.51	4081.23	3661.86	4626.56	2308.37	4212.12	3730.48	2163.99	3143.61	7389.73	4228.9	3745.25	3099.07	6598.42	4742.93	6242.65	3777.67	4351.19	3337.53	3332.7	2964.86	3093.81	2935.08	3162.7	5966.53	2949.34	3678.55	6841.37	3292.16
P62937	2021.41	5039.6	2977.68	1392.42	1795.73	1409.39	2681.53	1506.49		1664.4	2959.05	834.653		2976.7	1205.39	2290.95	1143.6	1567		4290.58	1718.22	2254.99		3056.01	1082.79	2128.66	2892.35	1691.86	491.376	848.385				1094.56	2943.7		1643.81	1193.62	1090.64
P63104	281.1	506.074	252.75	752.804	902.428	375.752	284.667	385.39		146.929	474.111	180.444		482.41	177.951	617.825	321.558	435.666	207.146	1028.96		1825.34	373.347	321.726		134.885	605.781	405.861		256.524			203.532		324.561		243.276	745.484
P67936		1454.89	2440.49	1246.52	1700.17	548.567	2244.37		811.36	700.779	1476.5			1415.12	613.516	1092.14	958.52	1579.72		2426.01		1282.07		2230.49		1163.1	1557.77	1576.76										1168.08
P68104	1517.45	2389.45	1310.35	1357.15	1621.56	1518.98	1463.62	1187.51	1202.12	952.347	1305.85	1561.9	974.577	1335.48	1757.28		1733.88	919.588	1003.83	4533.3	1549.37	1274.43	962.877	1965.66	1600.05	1554.99	1234.31	1145.39	407.298	1012.02	829.502	1277.6	1139.54	932.458	1226.16	938.308	1160.6	1480.45	873.96
P68363		5436.83		1406.63	2216.76			832.036	1505.88					1675.09	969.209	1721.91	1974.23		787.981	4934.4	1442.55	1660.13		2471.08		2320.14			623.777			1277.59		699.873	2545.17	834.038	1678.09	354.442	3442.76
P68871	320325	824158	403893	227001	686455	821638	658573	251734	342861	525272	352915	657801	699760	789698	352730	533217	415320	343939	375758	673853	793795	1659510	960702	424980	1005640	476279	323744	249192	4306.98	310558	840139	518992	2152060	782924	677160	535242	1025390	289597	760882
P69891	1352.93	2290.02	2681.69		2998.1	2478.02	3852.95	4238.23	2171.37	1101.2	7463.29	1972.37	3534.71	5398.02	2757.56	9941.63	4780.39	1562.93	2811.73	3078.66	5606.97	65051.1	2469.61	4645.25	2789.43	12916.6	3852.98	3543.84		4310.06	1965.37	4615.75	14370.9	4495.46	4420.91	14048.6	9990.67	4323.44	3333.12
P69905	113237	350406	147500	88851.4	260706	333576	266153	109736	127323	214050	154717	243759	326961	332737	151249	230272	177797	130963	143671	303102	283637	641881	425955	161391	422682	188568	128307	96098.5	3877.36	123745	292733	185814	840423	308841	297227	226291	398181	117555	286072
P80108	30640.4	27974.4	43090.3	47265.1	30989.8	33569.8	28115.2	24250.2	26855.8	21399.2	32372.6	20192.5	26885.6	21954.8	28785.3	19327.7	18057	29343.3	23300.6	27097	21967	18910.2	37151.4	23223.5	33679.3	45241.9	26987	22420.2	5186.65	21058.7	25209.6	22665.7	28643.7	25442.9	16553.8	17458.7	28437.7	14219.3	29919.7
P80748	34964.4	39888.8	46200.7	43824.5	93067.8	61508.7	25516.5	34481.6	27384.9	27224	60548	74649	56431.6	28411.6	72178.5	37452.6	51493	65429.3	76209.8	30189	58273.5	49388.2	47188.4	71320.3	75945.1	12340.9	19376.6	46413.7	3059.98	59830	56246.4	80484.8	40550.6	28604.5	90934.6	403479	20849.1	34232.7	41260.3
P81605	5516.22	2531.35	3053.64	3441.03	3596.74	7686.32	4089.6	3882.24	3882.26	3138.12	7411.37	3149.45	4458.19	3549.7	4656.33	5034.32	11050.4	3792.34	3932.05	53599.3	2676.5	3546.58	4844.33	4303.09	7469.3	3555.84	6488.75	2808.04	1267.63	3760.63	3704.86	3312.26	4533.14	4742.05	7468.99	4401.19	7143.3	4808.46	2823.86
P98160	602.006		808.008	797.007					632.005	813.008			861.007	934.009		466.004	606.006		587.005		643.006	1125.01		1304.01			594.005	1150.01		850.009	1441.02	607.006		644.005	909.009	1235.01	895.007		794.008
Q01459	2700.49	2325.1	3072.46	2265.43	2502.72	940.255	3216.62	1504.77	1510.98	1197.44	2655.71	1468.83	3442.07	2279.53	1812.49	2323.1	1295.63	2150.16	1710.09	2972.55	2062.6	2310.49	2865.12	1953.2	2856.29	1658.81	2082.81	1944.72		1477.69	2500.57	1801.56	3064.82	1123.73	3635.74	1905.65	2655.85	1554.8	1751.06
Q01973	14939.1	14142.1	33837.2	31848.2	24898.2	9599.08	15904.1	9623.07	15510.1	15271.1	36768.3	21032.2	27822.2	17236.1	19661.2	18468.1	17478.1	25446.2	15870.1	33981.3	15397.1	9632.08	27351.2	14702.1	23946.2	29620.2	17887.2	21747.2		23710.2	9192.07	15322.1	20406.2	20199.2	22702.2	12730.1	14573.1	11924.1	20219.2
Q02413	6462.67	7611.82		4456.44	11189.2	4909.96			4700.72		6520.64				2938.8	2800.13				36304.5		3220.16	7033.26		9975.44	2008.58	3537.64	18560.7			9132.07	7641.98	3479.35	3039.86	3427.86	3125.68	5284.77
Q02985	1790.62	633.214	7795.25	5705.27	8674.44	2096.4	4396.07	577.944	2932.2	1233.01	3891.08	2620.75	2809.51	1120.61	2338.36	1960.56	1909.89	1055.69	638.207		659.181	5392.89	2057.44	3509.1	10126.8	1341.33	2142.34	5876.98	848.944	1481.16	2818.92		4753.09	3862.2	1023.73	1077.66	2275.72		3011.52
Q02985	11710.9	6034.35	31888.1	25054	35143	13472.3	25963.8	10480	20436.1	14676.7	26516.4	20467.4	25605.9	16620.1	21390	23151.8	20846.7	13390.7	12893.4	8870.85	17671.8	22235.2	16050.5	16980	32005.8	12758.1	12246.8	20551.2	1439.65	11195.7	27813.4	14389.8	21707	26562.9	15887.1	10428.6	14351.7	6934.3	15345.4
Q03591	55067.9	58332.6	40186.3	56115.3	63319.9	31831.8	43727.1	23505.6	33831.7	18968.9	24476.4	33998.1	41167.2	44167.7	21783.2	23104.4	18909.9	16885	20131.3	13190.7	20016.4	37975	32614.3	50755.8	58477.2	31027.1	47472	43372.3	3413.36	35730.8	25389.8	24863.2	50287.5	56622.9	22017.9	19052.8	29059	10414	39076.5
Q03591	40839.3	39101.3	41564.4	38897.3	49652.5	29486.3	50043.5	15199.1	28652.3	13362.1	22252.2	31829.3	44369.4	35870.3	19460.2	22838.2	17045.1	23739.2	20537.2	15360.1	20113.2	29945.3	29133.3	47243.4	52372.4	26432.2	46884.4	43518.4		32563.3	34478.3	27434.3	57956.6	50824.5	27889.3	28662.3	34398.3	10102.1	44537.4
Q04756	58209.1	61084.5	60834.6	71683.7	38102.6	56501.7	58924.3	53764.8	54423.3	50158.6	87081.9	60124	75071.2	72233	65006.6	70849.6	74639.4	60642.9	67141.8	78396.9	47836.6	63545.3	83857.7	63315	77764.7	52139.9	80836.9	60255.7	10268.9	62980.3	42884.8	57220.5	90011.4	61804.9	42505.1	66161.5	69102.1	36879.9	56529.1
Q06033	50443.5	45461.3	63699	59161.1	134951	67669	47358.1	68028.1	76718.7	26656	78618.8	65142	85052.2	73781.3	55383.8	76460.5	53541.2	66050.9	57135	64748.4	33268	48866.4	56618.6	80397.5	60376.2	58527.6	70544.4	54653.9	2621.53	71737.1	75342.5	37963.2	75280.2	61552.3	69502.3	58770.5	42076.6	37446	38589.4
Q08380	23180.8	14041.3	16755.3	19127.1	55354.2	12623.8	13915.9	7540.13	10421.2	14034.5	16597.3	27019.5	36784.8	18533	19992.6	21298.8	16532.7	16093.7	24104.3	12643.7	24937.5	46382.5	14716.2	66749.3	62811.8	10346.2	52289.6	43898.8	9220.95	25933.3	17784.9	24400.9	38043.9	27125	26761.9	31524.7	47573.8	14713	40098.1
Q12805	11995.8	12265.3	10913.3	14511.3	15206.5	14217	16053.2	11738.7	17612.5	7298.04	30633	12145.1	15430.4	16852.5	10310.8	16135.8	11628.1	10840.2	11628.3	15060.6	9938.9	12931.3	16038.5	15302.9	19365.4	14060.9	15043.8	12752.9	1229.59	12420.3	12074.7	7900.01	14748.1	8524.4	14692.5	15893.6	15877.8	12134.6	7617.81
Q12830	39963.2	41673.3	34145.2	41990.3	61616.4	101781	22363.1	46131.3	36756.3	34541.2	43725.3	48424.3	31614.2	70496.5	29869.2	44434.3	55322.4	47590.3	56935.4	51945.3	48167.3	61096.4	42943.3	62696.4	41255.3	53810.3	36515.3	34088.2	4996.03	38465.2	36543.2	41258.3	27813.2	28322.2	25841.1	34693.2	31274.2	38895.3	30723.2
Q12907	4431.03	3834.03	3248.02	4909.04	4505.04	2773.02	3548.02	2665.02	4118.03	2964.02	6313.05	3759.03	4355.03	4003.03	3244.02	4643.03	5451.03	3031.02	3322.02	3366.02	2739.02	4875.03	5914.04	3969.03	3501.02	4992.04	3920.02	3432.03		3399.02	3487.03	2048.01	4350.03	5469.04	4129.03	3681.03	3537.03	2534.02	3016.02
Q13103	2647.35	4207.65	4897.1	5706.9	5442.2	2648.02	5191.42	3091.87	3851.64	2392.95	6492.15	4471.26	6601.73	4145.21	4133.19	5942.04	4708.07	5785.14	4145.69	6194.65	4269.45	3497.79	3762.46	4754.04	4786.96	4999.05	4949.86	4590.99	2362.16	4997.11	2919.7	3575.31	4947.28	6885.62	5309.61	2439.66	2775.6	3441.63	4596.33
Q13201	1565.25	2677.86	2895.48	3826.94	2932.31	627.718	2214.66	1922.21	2328.25	1968.56	2844.25	3065.37	3400.84	2988.44	2218.79	2990.07	3052.64	3434.71	2256.81	2289.69	2282.26	2617.79	3323.33	2149.58	2816.05	2122.36	2429.27	1636.72		1940.9	1369.82	1587.51	2435.86	1965.48	2275.66	1509.16	1844.84	1407.54	3315.93
Q13563	10333.1	10155.1	6852.09	8373.11	11216.1	8832.12	11250.1	8452.1	7144.08	7098.09	9906.13	9839.12	10142.1	10287.1	7682.1	8558.11	6292.08	8690.1	5723.08	7123.09	11776.1	10916.1	8013.1	11847.1	12959.2	6768.08	11336.1	13692.2		9318.12	11662.1	11288.1	11441.1	9203.11	14015.2	10616.1	12445.1	13728.2	10626.1
Q13790	114548	93612.5	132186	139840	62495.2	100834	98871.9	120082	113602	76227.6	102191	122133	159502	136069	98230	121118	142864	107608	135621	94320.9	107795	92116.4	143750	157768	67137.4	79577.2	159924	94637.8	82442	119049	99547.6	87802.3	103633	133146	157182	110129	116769	53016.1	108356
Q13822	1871.98	2405.97	1429.99	2081.98	1646.78	1410.99	2696.97	1281.99		1255.99	2545.97	1055.99	1801.98	2890.97	1547.98	2023.98	2088.98	2472.97	1622.98	2049.98	1871.62	1734.11	1905.98	2236.98	1704.6	1643.98	2745.97	1414.98		2045.43	2496.97	2192.98	2206.7	1875.98	2041.59	1981.98	1391.98	1562.37
Q13939	9881.06	11583.1	7319.04	9164.05	8753.05	9466.05	23052.1	8061.04	13644.1	8394.04	11773.1	16557.1	17261.1	25241.1	14484.1	10901.1	13887.1	16100.1	6418.03	6590.04	9016.04	15901.1	7753.04	19205.1	11855.1	13566.1	29509.2	14320.1		11667.1	23266.1	15659.1	9597.05	9613.06	10015.1	10585.1	10017.1	17676.1	12984.1
Q14126	1543.15	1707.13	1288.64	950.817	1134.79	1543.99	1332.87	1185.84	1652.98		1464.4	1178.22	1840.33	1560.96	1383.5	1374.45	954.22	1408.15	897.143	1476.15	1355.11	1153.35	1779.87	1546.13	1444.09	1678.3	1846.89	1213.45		1827.41	1430.87	724.616	1203.25	828.217	1361.17	929.367	1495.08	894.924	839.633
Q14515	2355.03	1857.81	1693.67	2473.49	2538.57	1628.04	2920.71	1998.98	2112.81	1248.61	3104.38	2390.11	2935.81	2379.15	1903.47	1609.47	1736.14	2215.14	1988.1	1968.49	1818.99	2129.33	1981.01	2771.65	2560.16	2325.37	2505.47	1686.15	3720.32	2271.47	1645.29		2285.22	1354.05	3126.67	2018.82	1850.51	1264.8	1826.61
Q14520	32072.2	38143.1	39291	51561.1	40153.7	31061.1	26922.9	21868.5	31157.7	21466.4	40357.9	28738.7	34006.4	29011.1	37803.9	30741.6	28622.3	35156.5	28408.6	33416.3	25274.9	25179.3	33927.3	31518.3	34453.8	24843.5	30780.1	31427.2	2227.58	24120.1	22277.2	25213	32773.8	29503.2	37186.1	21131.4	24536.8	17396.7	31827.8
Q14624	308073	316272	382398	343471	443948	324989	299248	284684	391973	215079	411453	377915	493760	349478	382481	320219	362400	407131	361633	352860	311763	279496	388413	378906	312933	260751	342999	320950	12659.2	337260	271383	245682	425440	367422	467830	292373	239856	140630	381621
Q14766	974.307	1295.72	1170.55	1333.22	1403.57		1056	580.155	268.123		1135.78	1174.45	1689.5	813.591	1433.63	516.707	1408.14	889.553	1025.68	1167.07	672.564	1103.08	1284.13	1737.91	992.07	1024.52	1876.66	1221.61		728.823	659.995	679.984	1861.28	885.845	1652.93	1562.06		893.441	1840.23
Q15113	2719.21	3093.41	4476.82	3380.86	2385.75	1386.01	4317.15	2745.69	5088.85	1862.45	5691.79	3077.16	4546.8	3290.83	2335.44	3178.82	2285.66	2322.74	2707.71	3670.81	1607.4	2996.89	3570.74	2436.68	4055.81	3532.49	3810.73	2366.83	1057.08	3991.48	3009.74	1323.9	3576.99	2821.69	4568.8	3072.13	3661.92	1300.13	3068.8
Q15166	44873.7	27723.6	45580.2	56015.8	23735.6	13470.4	29334.2	29409.6	25552.8	16505.1	55296.3	37790.1	55995.5	52354.2	31209.8	30403.9	38368.9	39929.1	30562.3	30695.9	39327.1	25988.9	51683.2	32913.8	27251.4	38760.8	28466	26534.3		36260	38670.2	31641.5	35359.2	28146.8	52623.9	48992.2	18517	16620.5	31222.7
Q15485	8134.61	5282.42	11390.8	4320.02	4550.34	3819.49	7187.91	4862.28	2233.4	3238.19	3979.5	5368.16	8791.73	5626.69	4224.82	3672.3	3106.46	8165.11	4054.71	8276.78	5171.77	2175.74	7453.66	3316.19	7723.01	3507.43	3536.79	5284.4		2987.66	3121.97	1345.66	4958.16	1479.02	5100.2		2976.7		3718.13
Q15582	44793.3	45422.9	41893.2	48687.4	82396.6	38720.1	41886.3	25725.5	30900	26241.4	38853.2	32966	41904.9	29574.5	34924.5	32302.8	31781.3	33421.9	25460.8	39336.2	28047.2	39486	47370.9	46780.9	45855.1	26399	40319.2	40960.9	8022.44	29331.7	33329.7	28909.6	42398.6	34774.2	49958.2	45131.7	27785.8	20701.9	37891.8
Q15848	10978.2	9941.25	7363.4	13533	12888.1	4487.34	5807.79	11549	9208.37	5587.03	15857.3	12172.6	17112.7	23954.6	10624.2	12270	13910.6	8544.08	10034.3	13024.3	5901.93	22887.6	7779.73	7625.53	9282.25	18347.7	10535.5	8094.79		17434.7	30325.9	5851.13	12264.3	10939.7	22789.8	17465.2	7915.38	18979.4	11406
Q16610	9258.97	16442.5	9512.78	12129.3	9949.75	14535.6	10146.5	10395	16761.3	9129.01	15649.9	9761.79	12539.4	10210.8	10559	17065.7	10059.8	11594.5	9384.9	13782	11522.1	7753.16	15279.1	10881.4	14256	15564.6	8285.31	5962.17	1085.02	12106.7	10480	6289.69	8443.64	8528.49	11114.3	11299.5	10936.5	7927.18	7136.94
Q16853	4358.57	4125.41	4155.47	3817.85	4310.04	4533.64	4037.54	2974.27	2829.56	2935.26	5918.07	4899.23	5045.49	4942.4	2835.12	4447.2	3428.83	3862.11	3456.46	3881.24	4197.04	4070.61	3991.16	2950.81	4627.25	6045.49	4047.8	4739.78		4642.76	2453.58	5012.73	6018.31	3653.5	4781.11	5529.99	3014	3491.93	4125.58
Q562R1	5607.3	14092.5	9174.77	5737.27	11799.8	3472.78	12136.9	5030.92	4721.6	3849.21	15208.1	6252.48	6939.27	8971.35	2463.03	6793.87	6279.36	5361.98	5636.86	13843.9	4800.25	11084.2	7455.16	7362.2	6729.57	6725.14	7762.38	5843.54	747.175	4634.57	3301.87	3317.6	4408.09	3285.09	7371.27	5882.34	4962.77	3540.42	5780.63
Q5T749	6004.16		5280.55	4714.83	5559.02	4158.51		1898.72	3633.94	2196.18	912.44	3882.88	2076.98	2515.8	2706.73	2226.77	3047.44	1832.26	3023.18	4467.57	4038.25	5671.85	2040.07	7288.96	5733.07	2778.73	6117.08	6844.88	8477.77	5277.38	3916.63	6104.38	5494.69	5686.82	4901.6	2893.82	4563.25	5355.99
Q6EMK4	7734.53	6962.77	6961.86	8275.48	8791.82	7608.73	7592.11	4584.93	6129.67	4513.19	8334.39	5847.25	6788.49	6773.2	5336.02	5888.61	5529.63	6240.48	6567.5	8979.48	4335.76	4733.28	7174.4	5169.95	7817.06	8982.69	5777.4	6754.93		4937.64	6418.49	4044.79	6048.11	4005.35	7481.61	5416.2	5778.61	4759.56	4488.66
Q6NX45	56062.8	40831.9	32793.1	31831.4	77324.1	50540.9	30836.2	40769.9	33175.1	34387.7	37103.4	53187.8	52017.8	50786.1	22657.6	48267.5	33700.8	42388.9	56203.1	40100	91343.8	41909	28230.9	52634.3	53512.9	24655.7	13609.2	74609.1	21129.8	49743.8	33133.2	44032.1	49247	40260.4	48134.7	36844.4	40138.7	46895.7	61446.9
Q6UX71	1608.58	2920.13	2850.97	3055.36	3038.62	1659.14	2414.49	1714.75	2127.52	1888.36	5918.21	2127.1	3153.99	3289.47	1576.49	2602.66	2720.73	2411.14	2255.4	2857.48	1996.27	2837.62	3394.53	2239.05	2255.44	3917.57	2179.92	1507.26		2326.2	3283.33	1808.7	2512.69	1617.18	3801.8	1976.33	1723.62	1754.38	1868.46
Q6UXB8	2278.15	1570.64	2051.49	1994.96	1049.76	712.56	2866.12	1143.59	1591.88	1793.5	5913.77	1937.26	2065.49	3587.84	1693.28	2526.6	1819.85	1614.31	2347.18	2823.46	1911.74	2979.47	3349.02	2000.78	3560.47	3156.97	2995.69	1622.79	852.326	2757.61	2901.05	1401.44	3168.74	2310.86	2723.98	3654.83	4109.36	927.28	1164.33
Q76LX8	4564.43	4544.75	4554.96	6949.97	3920.16	3012.53	5671.66	4138.81	4900.79	5519.4	6389.28	4812.11	5879.36	6339.7	4883.67	3854.66	4715.81	5045.77	3938.26	4537.67	4107.62	5823.74	5965.36	4512.89	4627.96	2153.13	4209.66	5329.4		5275.72	2449.9	2841.57	4533.79	3576.37	6178.96	4060.2	2973.28	5926.16	3343.91
Q86U17	1532.18	1292.01	1448.04	1199.82	1858.64	1890.8	2450.88	775.589	1551.19	1414.66	2500.11	2013.69	2691.22	2983.5	1705.46	1394.03	1296.77	2041.22	1391.42	2386.11	1235.03	2213.08	1328.35	1604.08	1341.63	2020.38	2128.75	1715.19		2359.67	1534.36	1525.64	3860.51	2321.44	2598.83	1427.64	1617.61	1407.98	1547.62
Q86UD1	3156.04	2699.36	2261.84	3093.65	3793.67	1847.6	2872.33	1462.98	1918.21	1905.42	3777.79	2351.95	1874.06	3115.48	3013.54	2923.75	1979.49	2724.22	3336.07	3009.57	1991.25	3592.65	2443.6	3403.66	3658.97	2707.69	3211.33	2910.03		2368.45	2206.83	3258.73	4810.04	2281.16	2516	2757.94	2531.29	1687.87	2560.93
Q86VB7	2319.64	2309.22	1366.13	1556.49	2387.08	1752.01	1827.49	1315.06	1077.14	1779.75	2548.57	1586.65	2533.29	2241.48	1397.32	2519.15	1075.07	1808.6	2095.98	3927.89	1034	2535.23	1914.69	2179.08	1852.23	1603.44	1919.62	2328.05		1116.02	1213.32	1302.24	1818.08	1141.34	2910.18	1533.58	1025.76	2108.56	1405.31
Q86YZ3	3002.17	625.078	1442.97	2341.37	966.19	2434.31		2380.12	1947.31		1703.75			2031.92	1263.34		1369.58			25688.8	2178.89	2514.23	2233.17	3227.13	1378.32						588.176	1619.34	775.136		3470.68				4566.33
Q8IYE1	14892.1	16628.1	12731.1	21152.1	31905.2	24768.1	20895.1	11747.1	17626.1	11004.1	18038.1	30198.2	37373.2	14160.1	12669.1	25928.2	17307.1	19943.1	15777.1	19154.1	19293.1	21451.1	32362.2	29730.2	22191.1	7757.05	30378.2	16588.1	5862.04	21809.1	19555.1	16394.1	26348.2	29505.2	34129.2	16123.1	15873.1	10054.1	24126.1
Q8NBP7		2092.01	2176.01	1992.01	2414.01	1738.01	1729.01	1554.01	1566.01	1619.01	2514.01		2191.01	1740.01	2195.01	2549.01		2336.01		4413.02			2201.01		1667.01	1392.01	2037.01	1590.01	920.006	1955.01	1621.01		2733.02	1456.01	2498.02		1681.01	1518.01	2445.01
Q8NHQ9	15869.2	19738.2	32169.3	26622.3		7833.09		10958.1	16949.2	8298.08	19183.2	11673.1		15291.2	15287.1			13466.1	13851.1	25767.3	18207.2	10691.1	31198.3	7781.08	24272.2	10635.1	17872.2			18049.2	17795.2	11655.1	23696.3		32854.3	18490.2	20455.2	7304.07	13002.1
Q8WZ42	32750.9	57022.7	29783.5	36240.1	45204.3	72821.9	45013.5	20716.7	42252.9	27366.8	63873.3	53120.9	37133.9	47423.5	42245.4	45075.8	28236.4	40998.2	31259.7	45082.1	61038.6	80731.4	54871.9	61963.4	76391.8	25717.4	44183.2	53352.2		47267.7	83871.9	58761.7	124173	67647	52235.2	131908	65138.2	40695.4	87528.9
Q92496	4219.31	2481.88	4138.56	3466.16	4357.91	3399.8	5466.52	3663.62	2524.34	2214.12	6327.89	4823.43	7955.39	5803.03	4983.89	2034.42	3394.48	2470.43		2187.64	7909	3974.46	2725.8	4524.71	5132.86	2848.5	3262.53	4534.91		3235.58	9817.42	7619.68	5512.45	9096.87	7058.25	3195.86	2603.79	2428.82	4624.44
Q92820	6696.49	4156.92	6291.45	4901.38	8866.52	2930.8	4783.45	3591.71	3593.66	3807.16	9500.17	5135.81	4431.84	4752.44	6369.38	6273.35	5132.31	5451.07	5029.06	7119.95	3292.62	5050.08	4468.23	5942.4	6353.77	4227.64	5151.93	5836.08		4178.6	5274.73	4046.97	5890.35	5040.9	5431.24	5684.49	3060.34	3956.82	4306.5
Q92954	15348.9	17189.8	21223.5	20204.7	12758.8	7553.56	16079.9	8575.82	7317.88	11981.6	20770.7	12697.3	14973.2	10141.9	17325.7	14559.5	11673.8	21628.8	12325.2	19891.1	9930.35	7173.11	22567.3	13685.7	21445.2	11005.2	15093.9	21136.8	4563.88	8142.4	5762.04	8586.63	13302.6	8248.49	10063.6	3712.04	7716.23	7862.13	17878.1
Q96CV9	113692	86032.4	110560	187080	71662.3	212614	206234	73242.3	119949	94695.5	128650	71306.4	85901.4	103100	88716.4	122868	59357.2	89220.5	72132.4	118071	109754	89148.4	127457	59184.3	170825	110014	116720	121222	27580.1	109184	91568.4	64693.3	138464	115840	82153.4	82642.4	152680	158003	76676.4
Q96IY4	35824.3	27517.6	34017.9	27607.7	39992.4	37454.1	29107.6	21685.5	23363.8	22413.7	27903.2	27480.9	40939.7	25496.1	27705.7	25690.4	22465.2	30902.1	22739.9	24209.5	26114.1	23982.7	30080.3	31779.8	17328.4	22629.6	31625	29502.4	3325.18	25936.3	25873.7	26558	37169.7	38559.7	46674.5	27405.8	23438.9	21054.9	46111.7
Q96KN2	18179.5	22589.3	23368.4	27238.2	15170.9	9227.76	16147.8	17067.9	11343.8	13352.8	27093.7	14109.4	19054.2	21121.5	19096.9	15151.4	13332.9	21713.2	7461.29	24322.9	16317.3	13246.7	24391.5	16950.1	20223.5	15636.7	22001.3	22155.8	6216.16	12605.6	12617.2	12982.4	24514.3	10219.2	17606.1	7833.39	13608	7845.9	19872
Q96PD5	108839	135304	163039	153688	76002.9	88922.6	107926	115451	111569	77097	176137	135519	184871	144031	145791	116682	141911	148421	132123	133884	98166.9	138889	166326	138541	112679	146084	168345	132371	4412.88	139725	90342.9	94733.6	165298	113884	208852	107478	109044	90675.2	121936
Q99784	2368.02	2605.02	1380.01	2297.02	3307.03	1741.01	2017.02	2477.02	2241.02	1605.01	3240.02	3142.02		1958.01	1727.01	2189.02	2827.02	3449.03	2897.02	3704.03	2755.02	2187.02	1251.01	2049.01	2319.02	2475.02	2194.02	2443.02		1902.01	1937.02	2207.02	1876.02	2240.02	1618.01	1504.01	2157.01	2367.02	1894.01
Q99969	2240.81	2752.36	3417.38	3302.11	4039.21	1804.32	4209.17	1660.92	2160.1	2283.09	3117.81	2013.82	3197.63	2836.45	1935.57	3275.85	2769.47	2746.53	2852.92	3629.46	2162.78	1921.46	2615.46	3425.96	3400.44	2204.88	2580.17	2499.2	2125.71	1712.7	1907.96	2172.61	3543.07	2233.32	2869.2	2818.62	2888.54	1184.5	2831.97
Q99983	2059.02		2079.02	2570.02	2924.02		7915.06	3342.02	5651.05	1331.01	4979.04	3458.03	4008.03	2060.02	3366.03	1803.01	1261.01	4672.03	16878.1		3441.03	3104.02		10260.1	3731.03		3481.03	4851.04		4911.04	4308.03	4576.03	7984.06	8376.07	1703.02	4783.03	3290.02	3405.03	3661.03
Q9BWP8	5145.18	5426.06	4131.14	4592.61	5101.31	4647.87	5458.19	3916.46	8369.66	4281.39	3546.15	4427.1	5180.75	5446.63	4752.47	4566.6	4341.77	3430.71	4804.96	4607.87	1917.85	4525.65	5249.76	4584.65	4672.88	4400.4	5000.81	4359.82	3288.22	4694.82	2988.77	3365.81	5116.45	3045.2	4860.85	4130.16	3079.44	3446.97	3799.62
Q9BXR6	4158.1	4780.91	5037.75	4813.45	4604.28	2012.69	2995.5	3324.33	3193.28	2214.7	6876.35	5055.99	5509.88	4092.95	3333.9	3031.69	2871.8	6197.57	2334.2	3946.26	3232.71	2468.97	3089.2	4724.61	4183.88	4278.35	4084.32	2877.74		2142.56	3370.61	2318.87	4454.06	2853.81	4283	2645.95	2297.3	1875.56	3483.76
Q9C0I3	332338	313746	292025	403940	182726	389161	370385	170731	359355	217539	358614	403625	427205	236155	290334	438883	422490	362702	297120	254747	354050	396594	493831	378389	250081	392525	348658	331319	195159	293990	507934	349215	399362	342608	291802	443403	348901	293536	402413
Q9H257	8239.07	4527.04	5155.04	6080.05	11398.1	10413.1	8714.07	4778.04	11047.1	3776.03	12800.1	10742.1	10150.1	7979.06	8637.07	10680.1	8071.06	11526.1	4308.04	8033.07	5753.05	5010.04	10637.1	15869.1	21697.2	6322.05	7346.07	8244.08	3454.03	17786.1	24162.2	9539.07	4046.03	13861.1	10971.1	8217.07	15132.1	15191.1	7204.06
Q9H4G4	1580.57	1450.67	733.285	1806	1204.8	696.982	1545.94	1115.26	1167.68	743.773	1789.38	1230.99	2199.19	2011.2	1463.36	1132.73	1640.98	1397.51	1314.55	1149.66	750.224		1029.77	1648.26	1143.64	1307.49	1926.26	1461.75		1685.2	767.833		991.91	850.888	2063.18	1034.24	1079.96	1019.91	1694.63
Q9HDC9	6015.29	9692.06	9605.33	8440.23	5598.27	13079.4	8344.63	8207.81	5385.26	5584.51	7973.84	7698	12660.7	10889.9	7950.33	6058.47	5785.69	8892.02	8421.95	8220.86	5597.32	8897.47	7963.54	11692.3	8477.06	7642.33	9990.56	6209.64	6889.86	8318.63	9660.57	5011.04	9205.01	6006.29	12130.2	6965.68	10760	6012.32	11774.8
Q9NP80	6840.04	14484.1	5160.03	17375.1	22504.1	7602.05		12780.1	12155.1	8059.06	16349.1	17073.1	9422.06	23348.1	7750.04	8209.05	5882.04	4473.03	7362.05	5489.04	16611.1	10747.1	6369.04	24855.1	16924.1	7921.05	27011.2	18343.1	590.004	11740.1	18823.1	9055.06	6320.04	18652.1	22913.2	5666.03	8861.06	17970.1	8319.06
Q9NQ79	15808.3	17497.1	18859.6	26526.1	17361.9	10899.4	23231.1	20047.3	20868.3	10654.3	29801.1	28302.8	38330.5	26070.4	20528.7	20447.3	22190.2	17170.6	17015.1	35172	25941.2	13349.8	24038.8	27129.3	24601.5	26657	30623.1	22324.3		29301.9	22244.1	20568.3	24380.8	19589.8	28497.4	20222.2	24698	18100.8	23405.4
Q9NZP8	13919.1	13230.8	17677	16950.3	20809.3	11880.4	15896.5	10802.9	11310.6	8818.18	17545.7	12958.3	16197.6	11942.2	13001.8	14456.3	14132.4	19183.2	14752.5	14473.9	11278	14382.8	16111	15717.2	16479.8	10697.9	15296.3	14800.5	7655.49	13314.1	13613.4	10528.6	16702.4	12504.4	20766	12541	12807.3	8602.16	13252.7
Q9UBE0	8290.04	11655.1	9092.05	12401.1	3497.02	2906.01	8337.05	8232.05	9516.05	6919.03	5737.03	3852.02	6728.03	6000.03	6827.03	7446.04	7365.03	8071.04	6048.04	7243.04	4806.03	3416.02	10129	4280.02	5314.03	9734.05	7511.04	5372.03		5365.03	6582.03	4964.03	6812.04	6561.03	6930.04	6430.04	5042.03	5094.03	5889.03
Q9UGM5	22474.1	37115.7	37652.9	30863.9	41532.2	28210.5	32636	16941.4	25805.3	20955.8	55822.2	27489.3	40762.5	26371.2	34091.9	26934.6	21797.6	40093.9	24475.8	30737.6	39320.3	35886.8	31259	31418.4	36928.2	33692.8	33422.7	38003.3	29728.4	26073.8	26295.9	25405.1	33167.8	22180.4	43223.4	20642.8	20238.7	16836.1	32257.9
Q9UHG3	13317.6	14541.9	15760.5	17530.7	10583.6	7841.69	10308.9	9109.43	8268.24	9197.47	16807.3	8871.95	13063.2	12649.5	13030.4	10403	12083.6	10749.8	9978.83	9601.27	9428.08	7047.99	21613.9	12651.9	10799.9	14827.4	12136.2	10437.3	398.805	10202.3	9998.24	8803.21	14753.5	8135.76	16457.9	11268.3	8901.84	5538.45	15803.2
Q9UK55	14507.7	13527.5	26176.3	21569.4	14847.9	11044.9	14630.9	10428.4	11627.4	8900.26	19177.9	12156.5	15304.5	12655.9	14390.9	16279.4	16316.7	20590.7	12564.7	18052.3	8395.51	11123.2	19613.8	16327.5	12047.3	14388.4	13591.5	13325.9	1330.85	11690	8750.49	7173.68	15152.6	13637.6	18860.4	7012.91	10563.5	5267.95	16185
Q9UNN8	5235.03	3853.02	3513.02	3311.02	3329.02	1816.01	3817.03	5292.03	2737.02	2302.02	5234.03	2856.02	4591.03	2957.02	2751.02	3102.02	2730.02	1909.01	2387.01	4000.03	2462.02	3316.02	4306.03	2498.01	10450.1	4823.03	3389.02	3406.02		3113.02	2466.01	3114.02	4223.03	1227.01	4680.03	2251.01	2287.02	807.006	2096.01
Q9UNW1	2752.76	2291.08	2721.02	2547.61	2525.9	1889.17	3268.83	3183.83	2146.77	1584.03	2930.1	2090.15	2482.72	2739.37	2237.87	2091.88	3107.95	2035.72	1454.48	2811.12	2332.98	3990.68	2610.6	2700.23	3206.99	2302.43	3533.31	2256.25		2228.9	2541.46	2471.37	3579.93	2091.44	4330.04	2139.48	2104.65	890.815	2710.68
Q9Y5Y7	6765.73	11757.7	8631.28	8402.2	6910.55	8393.6	9185.8	5682.94	4416.22	6988.08	18023.1	8524.53	11701.9	10374.8	6959.53	8325.93	8370.25	8410.95	8797.48	13316.4	6315.6	5408.97	12292.9	9274.95	6603.23	12520.8	8259.35	12063.5		12871.3	13595.3	10355.7	17335.1	7841.81	14927.1	8957.89	8006.76	10584.2	6183.72
Q9Y6R7	15417.2	12818.5	7430.65	9078.39	22824.4	16339.3	11825.9	9736.83	20897	16598.3	13623.8	16624.7	21597.1	20490.6	13597.3	15423.4	12488.8	12598.4	8321.32	14945	10755.9	19652.7	18528.2	14962.3	20609.6	11002	18443.9	15780.5	7298.29	18989	13163	19699.5	19662.9	13202.8	17633.7	21006.4	19582.4	15129.5	15095.9
Q9Y6Z7	3307.33	4993.56	3387.1	3757.09	3836.5	3282.48	3132.77	2727.63	5707.74	1910.43	4864.18	2644.92	4598.13	4460.87	3534.57	4577.51	2655.49	3065.94	3097.84	7369.14	2249.1	3179.45	4881.54	3910.93	2746.38	3721.28	3955.74	3082.06		2452.02	3121.02	2022.94	4239.34	2895.57	4152.1	3644.06	2573.43		4356.58

## Sheet: PEAKS-serum
Protein.Group	AC1	AC2	AC3	AC4	AC5	AC6	AC7	AC8	AC9	AC10	AC11	AC12	AC13	AC14	AC15	AC16	AC17	AC18	AC19	AC20	AD1	AD2	AD3	AD4	AD5	AD6	AD7	AD8	AD9	AD10	AD11	AD12	AD13	AD14	AD15	AD16	AD17	AD18	AD19
P04114	876427	463369	611554	768974	613720	262469	566213	343787	246041	540153	580436	521900	647759	441277	648209	494903	411952	634630	503507	406641	601148	621974	744081	773891	679170	484189	606889	491689	30805.8	385491	402492	408908	1060716	341982	770352	493458	502393	211690	762968
P01024	1.77133e+06	2018598	2.31952e+06	3.43068e+06	3.06541e+06	1.50683e+06	1.74824e+06	1.66493e+06	1.70025e+06	1741962	1.88032e+06	2308737	2.64845e+06	1.79461e+06	1926414	1.65016e+06	1.31639e+06	2.36156e+06	1.65989e+06	4.07593e+06	1.75785e+06	1.59903e+06	2.04707e+06	2.52352e+06	2.02037e+06	1.74333e+06	2.11905e+06	1.60161e+06	311814	2.01165e+06	1.38468e+06	1.72584e+06	2.56474e+06	2029505	2.18406e+06	1691966	1.89024e+06	987604	2.56737e+06
P01023	1.38942e+06	1412068	1.79102e+06	1.18711e+06	2.51861e+06	2.46191e+06	1.49138e+06	1.6281e+06	1.38577e+06	1.27852e+06	2.15141e+06	1.81164e+06	2.39034e+06	3.03532e+06	1.20307e+06	1.47737e+06	1.66879e+06	1.44696e+06	1.72553e+06	2201434	2.2204e+06	2108318	2.19835e+06	2.27582e+06	2.62508e+06	1.68967e+06	1.81069e+06	1.06485e+06	301050	1.94523e+06	1.44601e+06	2119457	1.81272e+06	2.06824e+06	2590215	1.66461e+06	1931961	908343	1.85293e+06
P02768	9716729	9952668	11437079	14367129	14798709	6932616	10275159	14763939	9920321	8942719	12030647	15388252	9673075	12211525	15534122	12461040	15026904	13070350	9942287	15733342	10277793	11696394	15752815	10563291	11642878	10942061	10068737	12217377	2.89303e+06	7664296	9402787	9935195	13864856	15036345	13535577	13642803	9066904	5113769	13597564
P0C0L4	296174	411914	292625	506488	808524	408436	460908	335847	518167	347553	510524	737359	783376	386198	366783	792933	665690	725133	602533	667483	491501	562884	890318	785604	690922	367021	778994	384841	249318	669782	476051	472583	603614	698649	753972	513121	450281	236493	601253
P0C0L5	294537	396410	285896	490823	810169	404950	460840	344218	515380	354746	522196	729430	765532	391361	374022	774820	653409	734592	611642	677151	491518	567690	905350	782395	689280	371527	780109	390203	247795	679782	481333	479931	591660	708560	787294	518213	449123	231343	594264
P02751	260185	360400	305106	313752	202895	170419	230483	174393	197647	333876	334074	233508	310624	254373	315025	264872	226338	350257	208912	371790	124827	17063.1	481852	185688	180197	190781	275218	316321	31595	119261	40796	139369	33666.2	36815.9	33070.6	29878.3	50063.3	117829	26711.2
P08603	451949	538961	667406	604579	734444	476714	387746	406915	486010	405009	635668	446492	530468	373838	516793	440397	410813	628244	445651	693756	451756	350060	516007	416585	534457	451419	460044	481287	26419.3	386548	308962	361996	464052	439545	492314	383350	337686	196707	514176
P02787	1.22865e+06	1.49997e+06	1657071	1.51758e+06	2.09847e+06	1.05194e+06	1.48753e+06	1.10329e+06	1.46539e+06	1.07221e+06	1.03925e+06	1.97874e+06	1.43768e+06	996898	1.33891e+06	662106	711622	592329	1079976	1.80921e+06	1.52369e+06	1.1637e+06	1.13018e+06	1.88075e+06	2093218	511857	1.75337e+06	1391659	534451	1.13632e+06	1.22685e+06	1608556	2.28027e+06	2.10463e+06	1.76322e+06	1.47879e+06	1.64837e+06	1.70931e+06	1.98873e+06
P00747	85908.4	100890	107724	313309	86880.1	78428.9	75761.4	86883.9	72865.9	87512.6	85482.9	91610.4	116630	72821.8	94750.8	82069.5	90593.2	97483.7	78955.5	106107	91868.1	61912.8	97210.9	92870.7	79266.3	88649.2	79838.6	85242.2	10524.8	74855	64013.1	69858.5	97723.5	68225	85534.7	59043.2	77244.5	56335.7	103525
P04275	14277.1	9305.74	11287.8	12008.2	10925.1	39715.1	88277.2	4925.83	17611.7	10951.8	106848	7368.42	13261.6	8430.99	2818.98	18735	5428.97	19597.5	12554.7	3873.9	1432.03	13946.4	6668.61	17913.2	11156.1	18772.4	14848.7	12563.4	1034.21	5506.43	1681.72	712.128	3827.96	16285.9	3905.97	1052.93	9499.01	4113.33	5423.99
P0DOX5	2.61318e+06	1.2134e+06	1443263	1.32304e+06	1.74768e+06	844510	2.23009e+06	1.72587e+06	1.59405e+06	1.11076e+06	1.08402e+06	2.7162e+06	2.15747e+06	1.60296e+06	1.12134e+06	1.03727e+06	1.94086e+06	2.19928e+06	1.52183e+06	1.50908e+06	1.40481e+06	1.81439e+06	1.68521e+06	2.49191e+06	1.75131e+06	1.40533e+06	1.19064e+06	1.7798e+06	81527.4	1.85491e+06	1.39923e+06	1.46041e+06	1.64507e+06	2.0052e+06	2.60886e+06	1.28391e+06	1.39223e+06	1.20484e+06	2.42442e+06
P01031	92150.9	122136	143568	121042	153656	129198	103645	109457	112432	99035.5	112183	69281	96335.1	86749.1	100216	115415	108098	151288	103057	130641	96543.9	78031.9	131245	129257	101912	113222	121595	96787.1	13017.7	113424	123090	110499	126243	117677	129194	78664.7	84072.7	54313.3	122282
P00450	368013	253704	443379	327512	569925	379110	298930	305709	402891	198240	347418	407335	463336	332109	304257	359700	439638	398527	388744	405347	252653	318162	301874	420908	286306	383991	516945	356028	54479.1	371399	452137	358796	401394	303170	433275	311334	233259	236055	343184
P01042	207016	199269	183692	159406	269369	189076	168528	130269	169940	110284	248961	158626	275239	171495	218113	172861	145262	209164	155936	193828	156810	172993	263052	199755	180928	159077	150495	136532	59284.2	200901	135878	185608	304512	208163	190319	138286	163779	81687.9	190883
P04003	240445	194409	266682	230729	245308	229465	191015	218307	169972	176406	209921	231932	268949	202017	210369	244024	161806	226800	185255	229040	188382	188183	222926	211898	186508	152593	291011	259548	29713.4	244854	153399	169254	299667	252474	270612	157995	187479	109732	264088
P01009	251898	239194	385697	295476	450168	175732	175912	262681	379775	288833	379086	324368	455519	342005	353795	265255	238717	370376	220490	286277	170959	201173	362831	220525	282474	267140	274638	263679	222170	316963	250711	218243	215317	376468	403465	272479	221768	260512	231752
P19823	370530	300194	445808	387194	262804	293306	297503	335930	274294	269829	436588	346757	410719	311973	348279	311367	354044	322304	319961	520882	384943	230072	445009	331737	252325	372602	407102	346765	67637.1	315507	244298	375241	388865	352319	379870	298929	228343	180763	363802
P02647	955572	949398	1.73655e+06	2102568	917833	1.56933e+06	1.37764e+06	1443421	752423	1.17795e+06	1.25563e+06	1.63321e+06	966918	1.85384e+06	1.42379e+06	1.55991e+06	1.44799e+06	1.93394e+06	1.0759e+06	1812551	807843	924783	2.08145e+06	1.32764e+06	1297763	986102	445906	1.02597e+06	338347	1.00334e+06	863096	1.28054e+06	1.99253e+06	1.26248e+06	1.29803e+06	1.07254e+06	1.16739e+06	1094878	1.43616e+06
Q9Y6R7	56658.4	15286.3	204309	33079.7	4575.31	40997.4	50025.5	55350.3	4997.15	1457.13	7260.57	35189.5	34668.4	1550.75	14161.7	705.076	45678.6	42502.1	47643	3607.36	13748.7	23448.1	8153.47	45047.3	3297.92	3676.63	47088.4	2875.62	78.0281	18654.5	11653.7	17059.9	25856.7	26280.3	2120.48	50012.4	2563.34	27704.7	9729.58
P00738	1.21777e+06	848358	1.1536e+06	1.37663e+06	1.39787e+06	637917	711192	837360	238727	715974	759441	1073790	1378038	519961	916714	354109	893028	535103	622790	543307	669457	586794	728534	1.46213e+06	708260	683880	1.08965e+06	687104	434521	1591169	1.08271e+06	725160	1.79265e+06	340542	978451	1.1542e+06	784629	541496	1.02878e+06
P04264	20574.1	755.941	2308.21	40367.9	2792.09	123643	1170.89	7313.51	7247.43	13645.2	12083.2	3717.26	5755.97	3640.39	44292.1	23309.5	8702.01	2054.71	5415.47	1.47683e+06	12910.3	135261	8719.75	3666.95	4104.39	38136.5	51357.5			752.349	3425.24	19543.9	26017.4	16525.9	51791.8	15918.6	234.134	31764.5	2905.32
Q14624	135936	150532	155266	171064	249887	153087	165168	107573	204178	118821	159052	217012	232099	172397	177883	152463	206112	189222	199174	178662	178932	170872	212172	177846	144085	121775	162995	163288	11770.7	180282	109619	119289	187678	163317	181445	126286	118195	59701.6	168457
P01859	1.74853e+06	2.0047e+06	1.52158e+06	1.28811e+06	1.12515e+06	1.05492e+06	1.44652e+06	1.65905e+06	1.23351e+06	1.26775e+06	1.24869e+06	1.72941e+06	683216	1.69511e+06	612730	927909	1.10999e+06	1.95519e+06	984146	473966	717871	960298	1.45736e+06	1.38613e+06	1.66881e+06	840259	662262	1.09595e+06	43959.7	1.38706e+06	457173	1.18559e+06	770320	1.2497e+06	1.70912e+06	421443	1.05986e+06	846033	1.44256e+06
P07996	7611.26	10091	17174.6	12435.3	17337.1	832.747	12264.8	7637.24	5835.15	11834.2	15054.8	11683.6	10827.2	13203.9	11083.7	12165.5	13870.8	16474.4	10819.8	11466.5	8237.79	12378.1	9790.44	8465.48	5940.75	7635.2	13738.3	12418.9	3293.88	5086.44	2357.97	9868.91	15063.3	13589.1	11055.7	8091.32	12162.1	9840.34	11879.3
P06727	259538	237951	295991	349568	147717	441573	355416	196909	293813	264254	328337	148336	172396	261509	240072	364471	167756	258962	182796	321141	264315	210474	271850	135059	387213	343822	203484	285952	28419.9	308521	267703	180506	308518	215304	174469	198927	404200	363247	188423
P0DOX7	1.24236e+06	1.02771e+06	547497	343818	1.22401e+06	969179	1.67227e+06	966529	339127	862911	161851	811420	1.25334e+06	1.15108e+06	964775	837677	668833	636825	587274	404372	969808	1.44405e+06	784067	557018	386134	348161	1.15802e+06	1340515	73573.5	1.17876e+06	1.00355e+06	1.86919e+06	1.65719e+06	1.50856e+06	879117	838033	1.44552e+06	747334	514613
P00734	176240	162862	197657	233966	185106	114717	154578	145235	163540	136680	215055	223854	205376	176680	207868	146236	208268	179162	166263	213737	158633	146326	255836	234959	132148	166837	157999	188942	6274.34	172222	123811	104690	250722	195716	211831	142384	127338	82931.4	215344
P01861	1.84741e+06	1.06675e+06	1.21042e+06	1.06634e+06	792161	822697	1.39125e+06	1.57123e+06	1.23934e+06	1.11501e+06	1.03642e+06	1.948e+06	937410	1.15683e+06	818221	814990	1.5497e+06	1.84793e+06	1.23415e+06	882325	566383	735288	1.23636e+06	1.18135e+06	1669464	1.0808e+06	669016	1.36932e+06	32188	1.12161e+06	724387	1.03352e+06	609165	1199627	1.73663e+06	723678	745689	741588	1.32962e+06
P00736	33809.8	38964.6	60653.7	29376.6	46064.3	35040.8	43231.3	25255.2	37570.5	31242.7	55465.6	28291.4	38009.2	31737.5	42915	37114.6	44052.9	50359.9	30685.4	36782.3	30844.7	41298.8	48510.6	29467.4	33240.9	33518.7	49821.6	35671.1	966.124	34494.5	31168.4	23939.6	54117.8	34605	53276.3	30458.1	30986.9	16479.9	33150.6
P01871	674788	240815	748434	173680	462970	193659	435441	336058	180208	312081	147920	567344	723227	302627	560407	229852	356053	249400	292638	766615	339505	465345	174552	443666	462773	543468	295117	384765	64898	417550	254265	196319	749260	224724	662470	173000	370097	440717	467193
P0DOX2	91232.8	190492	358796	180189	160132	220716	144308	340199	468749	131107	254890	383688	410822	40541	166688	155323	96667.2	209672	131531	72749.4	197812	112599	161305	41073.2	334859	20419.8	140666	75050.9	30428.7	196867	587373	446563	221186	159878	528782	294584	54558.7	231682	46573.9
P20742	107997	128684	124781	73489.4	131164	238312	33517.4	138045	87724.2	116688	216915	119177	166110	269033	93537.2	151372	122362	145399	66948.1	150659	184914	186227	138653	164565	229616	122841	143893	67908.3	2607.59	236760	117481	158223	127140	134865	146511	181777	133746	117956	89220.9
P02649	94822.1	62659.2	121162	77911.6	77554.8	56836.3	76736.8	41141.7	59052	112372	138077	81021.5	90494.6	90601.5	70193.9	78538.1	113987	72567.4	114794	89921.6	57051.8	76771.7	102442	63310.8	64495.2	92777	59375.1	58105.9	15826	47161.3	66016.7	68531.8	112073	27453.4	72311.4	61903.5	72146	53693	99565.1
P13671	24040.1	25256.9	42860.3	28509.1	20263.6	28946.9	29580	26325.1	20306.1	23753.1	43127.5	29862.6	38983.7	26761.2	29980.8	29225.5	27887.2	40486	32377.1	26735.2	30509.4	23001.8	33224.3	35059.9	22391.6	24502.3	28223.3	28758.1	12063.9	28405.5	26295.3	30216.8	45209.6	28568.2	33519.9	19395	20933.2	15666.6	34238.7
P08519	2469.39	6272.35	2112.96	14245.1	4924.15		2126.11	5556.12	2223.01	24537.5	4172.86	3390.78	6307.74	13143.1	1108.86	1637.88	2464.9	25879.7	3609.4	1343.94	1965.71	1552.18	2155.28	3428	2938.41	2569.01	7855.94	2670.53		57927.7	2272.79	10270.3	7828.62	1391.97	7394.72	7813.18	5141.31	2053.46	2796.07
P12259	280450	5352.77	45475.8	269393	9228.14	151510	50752.5	117026	124719	189788	7363.78	8647.09	30491.5	2131.55	130474	118764	24203	78407.9	92208.3	5019.64	206767	2157.27	27978	2983.68	103803	6770.44	57910.5	3103.89		2637.87	102484	10685.9	39912.4	3208.51	40692.9	153021	338290	3153.13	1941.28
P03952	34582.6	40426.2	36624.4	43116.2	30779.7	23288.5	29851.8	25454.8	16757	21865	36141.6	27383.5	28025.1	24556.8	35474.7	30719.2	35031.1	31264.5	39385.4	40558.7	12882.7	27422.9	33294.2	23062.9	22345.4	31618.7	34890.1	33407.3	11325.6	30464.6	15297.1	24721.6	34455.8	43616.8	30824.8	13185.4	30074	20405.1	46461.5
P13645	3429.52	72.7051	87.459	6047.69	544.07	37264	302.621	70.9772	1305.25	2537.12	4137.41	856.67	1611.46	770.62	10650.1	2750.54	1152.65	491.847	216.71	305671	715.657	39237.3	805.625	631.476	565.508	11541.1	15932			145.395	275.94	1363.85	5881.01	4785.56	5371.7	3975.19	1854.14	8113.9
P05546	128651	140814	160818	137414	147100	116667	119542	58853.9	94458.8	70792.4	141980	133554	155246	75127.1	123717	100483	116131	163409	155087	128180	108082	47618.2	87032.3	124460	79682.4	84153.3	136898	124512	490.563	154539	99707.4	110008	170774	73080.2	172578	87896.5	109528	74569.6	162259
P02774	539209	497401	521852	694602	625842	442539	469898	446922	447211	443076	627836	606381	507442	565839	472399	598088	504586	411262	434642	572769	478721	491984	603884	553865	466172	482258	490684	414356	69437.9	471349	491533	392974	466367	425254	567005	472719	389899	266440	634747
P0DOX6	589202	231319	734071	172659	412027	171345	423812	301374	179857	308616	131730	553226	697069	301008	554797	199717	352928	217015	267362	760537	297592	413696	157868	388538	413693	541117	287515	366272	43509.6	372894	237659	190119	724892	217429	641373	148439	312580	421608	413042
P10643	24561	27443.7	32662.6	54037.4	20739.4	34222	27357	39841.7	32633.2	14901.8	36387.5	30236.5	29362.5	47175.4	28231.4	21066.5	33521.1	40828.4	33900.8	30296.5	31753.7	30115.8	46793.3	29158.3	41851.8	37536.1	36704.2	30814.6	15057.7	28498.3	7631.2	24327	35766.3	28251.3	48401.2	32943.1	32607.9	26763.7	17983
P35527	11053.7	13765.3	4457.69	49912.2	1214.45	27879	2573	29985.5	2152.16	5958.29	4134.75	530.492	3340.22	9961.69	18469.9	10848.4	5481.93	3632.32	1836.32	551804	27155	13374.7	4830.18	1169.01	1359.83	3893.26	13190			67348.9	988.736	11014.7	10476.4	4463.68	31657.2	4084.7	107.552	6253.39	255.346
P00739	559732	334701	686344	683859	650112	358272	449690	485165	99572.6	289747	200991	568636	671043	249731	528901	259973	435147	391336	284461	252020	303985	282966	402968	790465	393028	267340	490527	428710	112829	936878	671387	451703	697681	230433	594542	480071	421072	315244	455542
P43652	123079	143775	108882	106369	110773	87060.7	180877	79867.2	78143.8	101509	75491.6	72952.3	101644	87823.7	116941	100168	103905	130343	104666	122955	48298.2	82125.5	126445	75124	137327	89979.7	108470	116874	30601.5	122807	107622	115841	137092	134945	114172	78291.5	126511	81785.5	132755
P01834	1.37793e+06	1.25542e+06	538941	377847	1.40134e+06	1.01701e+06	1.75316e+06	1.01971e+06	357383	898573	219133	873044	1.37873e+06	1.2036e+06	994071	869157	692465	677127	621386	424177	923523	1.61102e+06	825024	713103	304972	365295	1.22681e+06	1.30447e+06	69048.5	1.31827e+06	914784	1.93547e+06	1.78473e+06	1.62719e+06	1.04373e+06	967629	1.66171e+06	852716	682731
P02790	488054	628553	990957	788002	640860	389320	721307	455630	601924	573708	599220	628951	635729	349981	544460	410138	635124	483304	791642	1.05899e+06	564803	380384	525023	610431	441249	500584	457337	457207	100.862	652964	411083	476027	526937	340787	953742	556297	561385	145840	624553
P19827	87631.5	134141	139630	138359	113499	81744.2	90263.8	115165	105329	86862.5	181282	111015	129102	100574	119149	93685.6	80736.9	140170	65464.4	143465	110978	57887.5	162721	120249	82309.8	137223	148998	116462	7703.11	135513	57512.3	67956.4	123710	157162	58368.6	91732.5	47625.9	50149.4	129481
P09871	36856.1	38710.1	48722.1	47256.3	43001.6	40269.9	42586.5	31397	36577	36115.6	60070.9	26884.1	32974.1	36257.9	35446	43023.9	37408	47225.3	34682.2	46292.6	36442.2	36835.5	48036.7	18674.1	31814.5	40521.6	34409.2	30715.5	3579.17	32324.3	25703.4	23388.9	37383.1	34643.1	42145.2	29935.4	31295.3	22534.5	29453.7
P01876	389088	593175	671989	668427	649300	667201	442458	740197	1.08233e+06	384070	1.00494e+06	917396	1.12377e+06	433513	702685	737386	330916	810034	545741	675504	351490	437870	907361	905564	1.14965e+06	416312	567279	627313	274501	991224	1.05597e+06	895528	1.06972e+06	694502	1077016	1074248	405243	288064	529858
P00751	190930	188474	204385	138141	392285	146746	138781	212677	227780	161241	272289	208831	249125	184812	216251	235234	232349	243637	169503	167619	144017	97060.7	198238	196981	228632	221868	160084	226082	23403.2	146381	174051	116568	230733	195391	207285	119382	126818	93067.9	183054
P35908	8450.87	580.26	753.392	16911.5	1511.97	125549	300.37	1299.54	3280.72	6816.09	13294.3	2508.51	3215.75	1600.71	23139.7	8559.08	3002.47	1140.51	1225.61	528287	3823.12	81711.3	3040.28	1917.54	2248.86	23394.8	36089.4	386.781		445.575	1230.72	5897.13	14447	8970.32	15316.3	7057.64	234.134	12031.3	177.792
P01860	876349	1.17995e+06	988278	695955	974400	603711	770593	1.11417e+06	801430	618711	790985	1.08544e+06	949626	871038	1.04586e+06	1.03532e+06	943964	898658	761370	981279	822112	692060	774764	442756	826773	856962	1.00425e+06	688284	89472.4	833428	888358	447594	689665	496330	1.18429e+06	829829	715778	372983	596308
P06396	108010	129340	102380	123148	81347.3	55895.2	117750	110797	136765	95947.1	173716	103449	175144	131685	108402	116358	107910	82729.9	84831.2	103738	101425	49011.9	161648	101666	99312.3	122922	94641.9	98940.6	31934.3	101407	70845.8	82032.9	139325	75489.2	117881	119247	116514	71793.9	71245.1
P02748	63578.7	33734.1	73533.4	43617.9	104189	101179	58324.1	38094.5	102166	47091.2	85367.3	70075	99561.3	59782	54886.1	63164.7	64537.3	114272	50867.4	54709.2	44368.4	65454.2	58104.9	91532.9	62929.7	48246.1	65925.4	56263.5	6698.41	60845.3	82721.3	52400.7	23381.3	64262.2	58103.2	64520	48124.4	40325.7	34021.8
P06681	18238	19557.7	25547.4	29385.9	34159.1	21311.4	22590.3	15352.9	20276.7	11551.8	23006.4	22196.1	33740.7	18416.7	29705.9	21558.5	73510.1	25177.2	19628.1	18795.5	32658.7	27889.7	44533.9	28838.4	19457	14430.6	20615.8	85254.2	539.779	13628.9	12170	15422.9	29133.2	24056.8	27760.9	13659.6	11311.5	7482.73	21297.7
P07225	23155.5	20125.1	36710.3	29063.8	19727.4	15923.4	23923.4	14908.4	18766.7	13138.6	27445.7	17582.8	22612.4	17497.6	22660	20084.6	21241.8	30418.3	24012.4	27219.1	18513.3	11549	30368.1	23797.4	18970.5	15275.6	27956.5	23923.3	626.085	18201.2	12108.2	15535.4	26550.7	50180.9	23562.8	12493.5	15472.1	8442.77	32733.9
P13647	178939			155722		18444.7	232.85		159.211		725.702	182225			5635.43	775.199	381.209	11083.5		486120	83246.3	18373.3	5416.45	172319	79038.5	4014	5057.1	82747.7		206029	174278	895.908	164184	1366.62	2268.52	122848	110294	2443.91	1356.54
P02538	179284			154623	94.4201	22019.7	232.85			340.469	1014.56	182387	358.424	818.363	5618.52	775.199	381.209	8219.91	58.02	746942	83170.4	19759.8		193092	79038.5	4602.02	6630.58	82747.7		206029	174278	1908.49	164636	1808.47	2553.51	122984	110294	2420.26	1097.98
P60709	1343.66	6773.13	3945.13	658.109	2754.1	740.866	2699.78	561.583	4924.31	12809.1	4417.06	967.289	1146.05	2247.96	16164.1	1806.42	2900.02	1664.98	1227.55	7877.7	778.833	4360.46	1240.75	2501.09	1030.12	19315.3	1621.25	947.119	1807.09	1072.41	196.084	422.85	1399.26	1957.24	7836.61	513.458	1221.14	975.771	6061.6
P63261	1343.66	6773.13	3945.13	658.109	2754.1	740.866	2699.78	561.583	4924.31	12809.1	4417.06	967.289	1146.05	2247.96	16164.1	1806.42	2900.02	1664.98	1227.55	7877.7	778.833	4360.46	1240.75	2501.09	1030.12	19315.3	1621.25	947.119	1807.09	1072.41	196.084	422.85	1399.26	1957.24	7836.61	513.458	1221.14	975.771	6061.6
P10909	126460	103984	83935.2	65141.8	62919.1	109261	66690.3	67732.1	90462.7	59457.9	49516	70923.5	80079.6	103802	100372	85039.9	76131.6	106681	68759.8	66988	51117.5	53306	106229	49715.6	51785.5	80812.8	57830.5	59734.8	7613.5	44582.7	42573.1	28440.8	60816.8	62686.5	78565.3	25837	43344.3	52271.6	54272.4
P48668	179284			154623	94.4201	22019.7	232.85			340.469	725.702	182387	358.424		5873.43	775.199	381.209	8219.91	58.02	702634	83170.4	19759.8		193092	79038.5	4602.02	6630.58	82747.7		206029	174278	939.315	164636	1808.47	2553.51	122984	110294	2420.26	1097.98
P01008	111699	74337.2	130051	89652.1	123545	134304	86140.4	83077.2	117579	82779	129684	95855.4	151821	124122	137424	79656.4	95670.4	111151	126297	134621	102512	130606	111596	102094	92254.3	119802	125160	114261	14861.2	105225	122254	83213.2	111571	131717	143206	84890.5	101092	75345.4	123908
P04196	85466.8	87696.3	67195.5	70911.7	88097.1	50726.5	60621.5	93827.2	78475.8	50382.5	58775.8	55876.4	93157.2	64760.7	55863.2	74509.1	52494.4	71341.1	54129	83391.3	84514.2	52665.3	66567.6	77767.7	63035.4	93130.8	82160.4	87997.5	1012.39	77022.9	57951.2	38161.4	103171	42026.4	85394.3	69449.6	45954.5	25119.4	80400.6
P04259	179770			155176	94.4201	21924.4	232.85	92.5926		340.469	832.006	182387	358.424		4773.97	937.021	381.209	8219.91	58.02	642977	83444.4	21561.8		193092	79038.5	4874.42	7639.24	82747.7		206029	174278	791.017	165428	1719.84	2708.36	123056	110294	2705.91
P07358	22042.9	26387.1	38084.3	33205	32413.2	26200.3	34806.7	24118.6	28577.3	20164.5	38388.7	24581.5	29255.2	19867.3	32951.7	25232.1	33029.6	37482	31716.3	32072.9	16024.2	20311	34208	33397.4	25845.4	30052	27481.2	25195.5	1135.45	27279.6	20317.1	19371.1	26759.2	32579.8	34917.7	14990.6	21743.1	16063.3	28183.9
P05156	26373.8	48742.7	80529	56483.1	55361.5	55182.6	36749	35017.9	32619.9	47778.8	59053.8	36921	55885	40519.5	42544.4	39239.1	42488.2	76616.9	41608.7	48640	32298	23363.1	47544.6	48522.8	50677.6	37006.8	29519.5	36074.8	1604.66	47412.9	26787.5	26716.2	43121.2	46286.9	47280.4	18750	27591.8	14382.7	39501.5
P02533	1198.58	8312.89		2720.71		17712.9	170.837			687.607	78265.1		421.953	260195	17599.2	95125.2	1104.09	177828	1406.66	464755	10448.9	14447.7	5964.83	50630	1767.4	2521.75	4439.87	18354.5		75382.6	224.996	2460.95	14345.1	5016.67	13993	2220.19		4038.82	4210.41
P08779	1033.02			855.342		16142.7	170.837			687.607	654.39		421.953		8269.94	1102.01	515.508		1406.66	493562		14197.3	226.99	50630		2607.5	4439.87				224.996	1435.96	2439.56	2105.91	7175.12	1809.18		4038.82
P07357	23393	26987.7	37167.7	32278.6	30899.1	32406.4	26662.4	24425.2	29042.2	24122.6	42204.6	25525.6	27026.2	21867.4	32391	30004	28718.1	44669.4	27221	31814.8	16055	18392.7	31686.9	35720.2	25602.1	33148.8	19999.4	24912.9	11188.4	26400.9	16141.3	19031	25952	29442.4	28295.3	13798	18259.2	42427.3	28247.2
O43866	101255	32870.5	122631	35145.3	61686.2	29759.9	69581.4	38031.7	29632.5	33483.4	24846.4	66229	76357.2	36124.6	59198.6	21800.9	41563.3	31729	38437.7	61724.5	29040.8	56373.6	20450.5	53684.9	66278.2	54264.4	43746.4	79176.7	9101.42	22282.3	28006	26917	82730.6	31006.9	101000	28077.4	58842.2	65454.8	60423.8
O75882	11786.1	4108.54	5251.43	7638.65	15904.6	11115	5909.19	5619.31	4391.9	6220.14	6842.35	5014.64	6592.75	14884.8	4258.01	4688.44	4353.26	6252.5	5557.88	7783.41	11746.5	2344.4	6446.5	7939.51	11991.7	3215.38	30810.5	9285.35	840.835	9715.34	4777.44	4093.92	11517.5	11195.9	8798.93	26438.6	8298.14	4834.75	12923.5
P05090	57287	42028.3	46369.2	57527.3	110325	62165.8	84948.8	49942.7	59083.2	18835.5	30382.1	51079.3	63519	48862.6	31968.2	23267.3	19975	21049.3	36468.9	18404.9	74727.8	79123.8	53518.5	108693	59979.6	46748	70481.5	63235.8	6056.76	78998.9	61517.3	62792.9	102146	67509	131434	122378	120067	89279	90879.4
P02746	20137.9	18043.9	30987.8	24401.6	22023.6	19946.9	25361.8	11337	19261.7	16192.6	28971.1	16697.8	25311.4	20206.4	21561.8	21944.5	17287.8	21499.1	17721.8	22164.2	19669.3	22480.5	23942.7	10982.3	22064.3	16652.4	27353.2	17372.9		22796.6	16218.7	15475.3	24275.2	18068.8	23589.1	14837	18694.5	15697.8	19205.8
Q08380	2565.98	1493.93	3328.64	3094.87	15268.4	542.53	11751.9	2186.38	4483.08	5142.02	6534.87	2318	4892.63	3506.44	4447.9	2382.64	2301.3	2885.45	8377.05	1355.97	2565.17	13584.7	8956.98	19370	14887.2	6515.4	14350.6	10021.7	936.883	4399.52	1177.11	2155.13	4406.93	2758.64	3618.79	15476.1	7158.48	842.645	5701.21
P01833	8696.77		463.721		23110.9	86.4953	5604.37		5183.67		451.111		50.4102	512.627				138.447	627.058		289.548	8404.55	109.108	67.8034	1886	623.597		506.379		174.074	43.7058	89.6194	1301.88	95.2985	233.846		568.231	1505.05	370.27
P05155	506323	186538	156192	201707	219614	142618	139499	471186	144400	95050.7	165544	126071	234356	143538	258279	165162	158578	174395	214559	123161	108100	96836.9	183498	212071	125658	147185	181758	130168	1470.41	172132	117111	136201	121656	483970	710905	102712	83609.8	388291	430365
P02760	67362.2	132436	60552.5	88283.5	106698	70835	83879.1	88408.4	124247	62363.9	141812	69014.2	150422	146101	71681.9	84163.1	82213.7	77875.6	56602.3	201201	155697	104484	128961	109983	129455	75204.8	127617	103961	27263	107077	78402.2	51882.3	131828	125037	137329	64651.1	98148.6	75334.2	99141.4
P23142	9335.26	11774.2	8029.58	15555.3	11317.9	9338.59	21300.2	9716.67	21998.5	15775.5	31094.4	14946.2	18032.3	12596.1	11756.1	18077.3	9112.67	12508.1	8929.17	13110.7	9988.58	16220.7	12833.3	8785.14	13911.5	19899.3	10696.3	11925	738.446	12416.4	11228.1	11014.9	13971.2	8529.2	15583.4	18006.8	13384.9	9982.47	6456.58
P05160	9662.02	5353.34	7546.32	8755.05	16191.8	3441.44	9387.48	4268.33	1740.01	1121.5	13761.1	6922.2	8406.7	5541.53	4710.33	1325.33	2000.45	2727.96	1992.01	3725.88	7874.38	8084.11	3583.46	6016.24	9146.71	4773.69	10920.1	8327.14	620.442	6897.35	5519.03	4677.58	8975.59	7574.91	7716.33	3469.99	4020.03	3355.93	7810.94
P01011	136655	212207	303020	258167	503087	297359	152515	165204	186636	142192	175295	179171	263441	183550	167809	189190	164980	246679	236634	198376	156163	165786	218891	247580	191027	161377	212081	118485	20840.5	147948	99106.2	104259	146333	102803	282279	193587	125959	81180.9	205415
P26927	1169.52	1533.9	3643.41	6752.53	3669.9	1740.32	2764.54	1577.7	1772.01	638.299	869.155	1884.78	2351.19	2429.61	2701.56	2578.27	2104.52	2335.53	1800.53	2340.05	1058.39	2016.67	3381.5	2995.99	3126.69	2124.01	2334.7	2838.62		2212.82	2676.38	1395.38	2935.11	2168.88	4855.21	1163.34	2652.24	265.838	4761.94
P68871	69119.9	206220	96235.8	46459.3	166733	130859	64139.9	43282.6	53247.5	152203	94207.2	119445	91294.4	221907	95826.9	142250	99635.9	80815.7	107332	159781	69132.7	473829	215188	108726	164633	138090	67791.5	56807.3	5108.14	78502.9	187467	138698	287106	163367	123724	104115	239128	56105.7	126934
P04406		16844.8	7153.71	440.681		5832.17	2412.33				1601.29	2296.26		2329.8		6532.74				17954.4	1716.94	1093.95		1041.95	739.07	5110.26	346.92	2220.49	240.438	4906.74	8077.75		169.425		5379.28	8034.27	59.2934	273.422
O14791	28259.7	35573.8	62809.9	33566.4	22007.3	17602.3	26137	30899.3	16288.2	22911.8	31634.1	16999.2	30857.1	23321.7	41183	32204	23695.1	47509.7	19021.3	34216.1	17904.1	19413.6	34110.6	29699.7	28687.5	27844	24288.4	35345.4	10209	19225.4	14991.9	14951.4	33395.4	25258.8	30219.5	11880.7	21233.6	28733.4	25523
P0DOX8	142099	560681	336240	335060	255431	42629	681136	274800	34222.4	202939	60383.8	504502	829437	126449	248159	337738	93410.2	147202	297015	330959	379315	282314	578870	471656	450083	250306	375827	733141	64532.8	711523	236800	219207	293439	270652	460355	518837	249825	44843.8	197565
P02675	975.023		1249.62	160.659	7198.48	1029.05	1487.45	1639.91	12184.4	2492.48	120.814		4019.64	2076.68	1117.14	179.072	444.644	285.513	3685.5		12940.4	92.8376	4654.26	446.507	22.3369	136.301	1299.24	2778.26		6061.58	1120.84	66.1116	2308.99	207.413	1423.31	2918.8	7540.61	49.4067	1411.51
P0DOY2	274230	348663	286887	364484	1.05205e+06	51312	393185	391114	153800	962984	43222	300778	523357	126068	142822	387582	33849.1	883626	310387	910027	221024	650414	595865	650003	419067	342996	320333	415024	50523.2	436511	147322	591641	868714	82609.4	426242	959707	857680	980176	134534
Q03591	30820.8	28600	21403.4	28928.7	33606.7	42402.7	19523.1	25607.3	33333.7	29583.6	30941.3	23809.9	25891.8	25113.4	19028.4	27688	23995.1	22371.9	14507	12333.5	23554.4	49937.5	22134.7	36875.1	37276.3	21254.9	35836.2	38684.5	1848.78	31374.2	25194.6	16238.3	26492.7	42392.9	18795.7	17443.7	20162.2	9070.16	34018.5
P08697	46484.9	53032.5	54726.3	37260.9	42206.6	52728.5	45024.6	29524.2	38283.9	27038.6	42235.2	91285.6	56551.7	33115.2	39600.6	52390.3	46277.2	51046.1	31460.7	53686.7	45194.8	41601.8	58947.6	41681.7	42828.3	42413.4	40705.6	39280.8	15970.4	42753.9	32119.6	33882	61379.5	50564.4	53716	34952.4	42462.5	27213.3	60292.3
P35858	15978	17840.7	21561.3	17358.2	10418.7	1440.71	18728.2	12713.5	9367.79	12845.9	15342.5	12817.5	21877.5	14684.7	23439.9	15885.2	10195.5	21452.9	18890.9	14234.5	21140.4	14806.5	21035.7	18328	8866.38	11364.2	21739	27150.5		16286.4	11826.2	15055.8	26115.5	19745.8	31235.2	11769.6	9320.99	7995.88	28076
Q06033	8739.76	5205.08	7647.06	52855.6	29670.6	15421.7	8840.87	13640.1	13784.6	10678.6	10674.8	11685.3	14574.2	13086.5	8941.33	17020.7	8606.36	8871.56	9646.34	78872.9	62552.1	10294.5	6186.02	20637.4	10274.6	10388.7	13210.1	10106.5		14684.9	13795.3	6088.15	13776.9	12784.1	10983.5	11716.8	6604.13	4431.7	54914.5
P04217	166159	211746	278287	180493	209110	194508	192199	178175	244914	104186	284646	233226	294273	212624	247263	239654	214691	222492	136818	261634	178181	226773	253797	214971	219710	183722	209306	173779	892.161	232695	193718	136388	219156	168110	335366	168255	132331	120005	273420
P02042	56253.5	138005	54426.5	34176.6	84808.7	81563.6	39732.8	35021.7	35234.1	100701	55552	87554	49000.1	129144	60467	115986	68345.1	52961.8	67574.4	102697	49456.9	382717	127452	64672.9	129915	85123.2	56690.1	31900.4	4696.07	44255.1	134555	73230.8	158413	108413	90065.7	72850.2	174915	42836.6	85627.2
P15924	1581.53	879.893		15416	964.961		15776.7	5460.48			853.218				9298.62	15794.8	166.221	648.604	318.863	32032.2		430.826	15414.3			17005.7	31240.4		144.236	2593.61			749.96	339.223				394.227
P80108	9165.78	8975.97	13879.5	12725	7087.2	8190.11	7072.1	5227.01	7651.4	5461.67	22602	3411.19	5644.17	3828.14	8841.69	3209.23	4064.31	7454.64	4372.34	3792.44	25517.7	3612.7	25200.6	3101.85	6428.7	18199.7	5109.48	4353.13		24205.9	7275.02	4346.43	6685.59	5344.04	19156.6	29902.6	8901.03	3174.81	5800.32
P02749	193109	164834	198758	201802	192531	88426.2	175313	80819.7	106270	67294.3	154756	135062	137365	89992.3	63623	105838	60701.8	79059.4	104789	119837	128275	81827.7	150092	174298	266772	104844	181256	131195	15809.7	146911	74360.6	63876.5	218822	101978	183326	153912	181168	104346	191136
P02671	4790.09	5499.43	9673.47	7794.23	5888.63	2131.05	12961.4	5185.54	3503.35	4219.44	7468.6	5325.53	5217.3	5411.69	9039.82	5477.38	6292.9	7873.75	5259.01	5083.02	9088.54	6633.04	9245.71	6722.14	11218.3	5340.32	9013.5	9338.21	7791.75	5923.89	12412.4	6504.1	10340.4	6220.4	14642.8	14478.1	13272.4	3115.27	4232.35
Q14520	10970.7	12368.8	12223.9	18238.4	14049.4	8639.93	11789.7	5083.42	10458	5114.32	12313.3	9466.83	10422.2	9215.58	14262.5	7689.55	9572.94	10797.3	8637.99	9145.33	8764.44	8935.11	9489.22	10732.2	11965.1	5902.17	7868.02	11779.9		7538.82	6142.78	7258.94	13690.9	9959.49	12743.9	6427.58	7369.32	3264.4	13549.2
P48740	462134	257432	323154	7604.2	12185.7	3186.94	710901	176469	307140	3124.89	8338.27	398551	454720	253178	280944	5184.7	312428	5347.29	193451	5476.71	411645	5711.31	394064	6633.65	481344	335788	488578	5291.03	1920.94	5117.05	5196.06	190802	603371	164427	1923.3	340668	355779	2944.56	415632
P02679	54.0826			6339.97	276.235	799.051		956.404	425.971	53.4757	281.922	123.08	131.701			3955.92		49.8543	2825.98	3324.21			6268.08	513.584		423.644	4272.55			42.6019	698.071	127.815	5962.42		7702.51	361.2	240.793
Q16610	1488.93	2491.11	948.503	978.642	5716.93	2469.51	1622.08	1345.41	2797.45	1432.95	2010.05	756.211	1421.75	1322.86	1718.48	2508.97	946.097	1246.38	1112.4	1822.78	2043.39	957.892	2058.29	1593.34	2131.82	1521.51	1263.67	119.009		2468.27	1952.93	1166.3	717.841	1428.37	1032.06	2076.52	1626.85	963.558	1137.68
P22792	13146	11222.6	23230.9	20712.6	24208.6	9614.21	16526.9	8750.43	18498.9	9321.78	14880.1	17389.7	18013.6	9086.56	15206.4	13852.4	10840.9	31273	9844.31	18010.8	17079.7	7669.51	17325.5	19671.1	13705.4	12545.9	19837.2	18238	227.229	14365.7	9913.65	13818	18229.8	21642.6	16874.6	9399.59	7260.59	15801.9	14718.5
P00748	23641.5	24209.2	28891.7	34120.2	41918	18471.5	16310.9	10860.9	10354.4	9356.43	24911.2	11660.9	15108.8	10551.1	26010	21442.4	23766.3	24050.2	13658.9	13980	30444.7	12451.4	17632.3	23236.6	19501.5	22503	23092.4	28171	2705.5	30955.6	8081.25	21962.1	15960.5	30873.4	41000.9	30016.1	16847	4690.11	35477.2
P27169	81697	53516.3	81771.7	97265.5	48606.7	49477.1	56455.1	37522.4	64518.6	51502.6	79608.7	78286.7	89040.2	73946.7	64495.8	81732.8	66889.2	80397.1	46686.4	66006	75654.5	51783.6	114249	54933.9	75396.7	87194.4	66600.6	70055.8	7268.03	72359.1	71605.7	66475.5	79571.1	61831.9	87594.4	61916.6	54324.8	28802.3	95067.9
P29622	26784.2	30907.8	36846.7	34228.8	27072	28815.2	23162.1	20502.9	27202.1	22404	26779.5	130272	22868.4	23379.2	36415.1	29697.3	31748.6	27866	31058.3	33834.4	194803	257113	44978.8	121047	45107.7	26992.5	37945.6	24045.4		34801.1	16040.8	20434.3	267400	276804	317762	21877.6	25509.1	102155	35944.5
Q15582	3136.38	1054.01	10626.5	1792.84	5095.62	896.865	13475.6	11530	10079.2	6152.95	10374.1	4646.98	7163.93	4439.08	5310.56	9379.17	6101.48	7231.5	736.753	9046.98	12242	7732.32	18772.5	10766.8	1912.61	14799	1319.55	10330.4	415.387	16312.2	1994	911.812	1703.44	1087.25	2234.89	1583.02	672.36	14142.2	1707.84
P25311	19168	2756.33	2740.71	1398.86	13168.4	2263.59	11239.4	2307.91	1810.05	3614.8	4610.15	7766.17	8191.94	976248	6067.86	1826.83	2063.5	2494.12	3902.65	1907.09	11116	13649.5	2736.18	904213	16298.3	4650.01	20104.3	13534.2	128.905	16157.3	22852.3	10736.9	18860.6	16107.4	21993	15502.4	19403	9198.89	17424.4
P04004	162328	201594	145387	146223	126476	164756	117241	138676	151818	142989	71087.4	91528.2	153416	61952.6	140221	124467	126911	157746	132632	145429	79964.3	77813.1	168920	142623	162056	140077	106174	92841.9	9617.17	108504	70074.1	98853.4	164839	155488	102053	75489.4	98360.8	86470.5	128701
P68133	1134.85	3848.16	2679.44	395.245	1856.19	334.135	2274.36	340.498	4687.76	12809.1	3307.37	803.779	960.461	1750.25	13623.3	1471.67	2231.01	1288.75	786.814	3532.46	710.877	3104.2	798.192	1624.47	661.202	18745.9	1325.99	789.463	1807.09	822.246	196.084	260.001	1182.89	1820.43	7061.95	293.041	1005.73	305.892	5723.86
P02656	78652.2	81146.4	137317	80706	26295.2	43223.6	150517	41266	33011.8	66088	49032.3	53409.5	63663.5	38240.3	112743	48270.6	53369.9	58391.6	85026	123798	59419.8	49755.5	111923	91444.1	67787.6	51602.1	57366.2	48019		30396.5	32804.5	42205.8	126731	36886.5	57707.4	20260.8	88362.2	36936.4	155705
A0A0B4J1X5	2739.64	3244.62	7370.24	2224.1	4354.01	1907.26	2789.14	7130.59	1959.59	1947.74	6132.93	10489.1	4133.75	7594.2	10777.6	9570.37	6195.15	6322.17	5240.57	3435.21	4859.76	3538.65	848.362	17269.7	3438.37	5351.55	2722.21	5762.18	4033.59	5084.79	30934.9	15051.3	1450.3	2501.21	2006.3	3207.87	22237.3	3436.56	1512.06
P01780	6538.23	20879.2	22859.9	6731.35	25880	8750.24	14878.2	13642.5	10116.3	10261.3	25933	39174	17927.1	9811.32	17577.2	20143.8	6455.03	14996.7	14661.8	8667.87	23169.1	16734	10960.2	21169.5	23612.8	10648.9	15693.9	13727.9	4885.73	27432	43694.1	17894.8	21067.9	7593.51	50825.4	16518	29568.9	23811.1	21708.7
P69905	15367.4	88086	41049.1	11824.5	71290	78111.9	77111.6	20265.9	30530.9	66511.7	37239.8	57719.7	69341.8	88865.5	38157.8	56767.7	43796	32192.9	39079.9	77153.6	64126.3	144772	102950	28077.9	102222	50440.2	26730.4	14782.1	9789.66	31610.1	94262.9	56303.8	246486	66069.1	69090.2	65934.4	128043	30669.2	85818
P20851	15019.4	84849	14534	12213	11236	6930.14	9668.85	8146.43	5780.41	5647.38	10549.2	56132.3	15161.3	77584.3	9941.46	11105.2	89600.3	11904.2	12887.1	66308.9	11453.2	10532.4	386701	58091.5	109267	8198.21	7215.14	10921.4	834.126	9108.7	5500.28	6040.53	37753.3	14356.7	10836.3	14103.2	82796.5	4880.42	376618
Q96KN2	4037.41	6449.81	6493.08	6747.97	1251.64	734.284	3255.15	2900.23	1230.46	2615.51	7417.89	2481.18	3872.44	3442.32	4401.97	2731.43	2616.16	5740.02	716.481	6578.96	3929.16	2045.4	6065.68	2578.62	4721.92	3213.57	6663.6	5585.54		2056.5	3485.97	2526.89	19001.7	793.23	4678.74	774.615	2605.92	596.907	3361.14
P0CF74	78576.4	331962	285827	308227	972378	47122.4	392959	369340	31085.7	781865	38122.4	287039	433574	40411.3	48442.7	301699	31695.7	779408	309796	905108	136647	403906	518981	379036	418233	213402	293511	414897	50070.7	374935	146137	591641	600754	81829.2	425827	481676	857003	978144	124143
P01764	1589.79	2664.66	3537.62	1806.84	3303.42	1820.79	1618.58	1609.7	1959.59	1947.74	6132.93	2293.89	2723.02	3772.28	3295.49	2032.35	1941.51	3237.86	6528.39	3435.21	2447.36	2506.36	848.362		2275.55	5351.55	1511.67	4360.73		3381.52	1308.2	13089.4		1909.09	424.005	1925.92	4319.47	6356.53	55.8451
P51884	15456.3	22352	17095.5	14802.8	9309.55	7771.68	17851.4	17033	14739.2	13301.7	48914.5	17436.9	23656.6	20039.2	13857.2	13667.4	11070.1	15827.4	16677.7	18379.7	13925.5	13152.3	19940.8	8022.42	21585.1	26526.5	14468.1	11283.8		16173.9	14923.8	8727.25	29590.5	13960.8	12941.8	14141	16103.7	4533.79	8633.46
P27918	34468.2	1050.63	2888.01	23458.1	25544.1	21608.2	1.66599e+06	2067.02	15481.1	1560.5	1.71027e+06	2465.41	2440.5	836.959	779.537	912.229	1.6596e+06	1574842	410.673	4164.81	1.08185e+06	938.05	78591.1	258.909	805.487	401.658	1.64383e+06	1.55806e+06	814.964	18333.1	1504.61	17381.6	576000	886905	69850.2	1706.57	30235.9	977.064	2709.19
Q04695	1656.56			661.481		14453.1	170.837			687.607	757.131		421.953		8303.84	1165.78	515.508		1406.66	289769	880.061	14130.9		50630		2747.57	4601.38				224.996	1435.96	2439.56	1957.28	5425.72	1690.15		3929.14
P05452	11324.9	16932	11517.1	14867.9	10504.6	12280.8	10712.7	10848.6	15015.9	11894.1	24425.2	12315.1	21330.5	15281.4	15718.1	19117.8	17043.5	17883.9	13370	17485.8	10338.1	13278.1	19662.6	8950.67	14034.9	14566.9	14438.8	10213.7	636.684	14762.9	7758.15	8982.56	13928.4	11331.9	17503.6	13950.7	13614.8	9788.13	8918.21
A0A0B4J1X8		1642.7	2987.54	395.928	2720.29		1214.03	601.138	427.125	369.703	828.155	18705		2729.96		487.388			4674.3		2662.6			101.186		591.319		7057.66		2706.68	2419.09	1172.09	2649.38	2530.49	21636.7	3417.12	1870.54	6286.57	1197.3
P02747	38435.9	43580.7	46906.2	47102	52461.5	41981.1	55291.5	34302.1	43928.2	33496.8	59414.2	41106.6	56537.7	42247.4	44553.3	48511.4	42194.4	48006.4	32790.8	45830.8	47288.7	52057.2	52846.7	23823.6	47218.8	37557.1	49974.4	41653.5	981.611	31659.2	33665.5	29889.6	59446.8	36903.6	58845.3	32963.5	39078.9	28527.3	37703.2
P49747	312.244	14999.4	477.075	622.619	259.391		1095.1	904.972	6215.95	320.456	4199.12	686.641	1558.05	187.208	722.163	1011.65	345.58	923.639	289130	676.201	8200.95	450.539	589.007	303.14	769.136	1028.62	835.761	210.061		992.491	106.739	11654.3	520.096	294.602	1391.5	669.433	691.853	91.1687	363.795
Q04756	2578.15	3000.01	3628.77	3967.38	1446.8	3733.9	3155.84	2734.82	2925.9	4395.73	5181.07	3897.83	5166.48	3694.66	4766.52	4871.75	5594.12	5128.86	3949.45	4770.03	2631.8	3629.52	5735.87	4176.1	4748.76	2151.37	6171.94	3978.61	80.7508	3662.37	1804.26	3705.14	5458.98	4235.97	693.315	2895.79	3300.3	593.221	3757.55
P36980	3004.92	5103.9	2171.41	9835.41	16450.1	9725.57	8045.7	8928.8	5779.95	7004.06	15136.6	9340.78	7771.08	6686.58	7316.78	6478.64	9910.37	8010.08	4986.66	7222.36	9432.16	28581	5811.84	8632.31	6888.96	7273.22	3368.81	7572.11	68.0402	4758.58	6880.76	1209.76	2293.88	7420.32	8183.78	5212.26	3690.99	3037.26	7908.67
A0M8Q6	11359.9	307101	258276	290607	898267	10144.5	311280	339070	7454.45	760766	8748.01	239083	364739	13386.8	20271.3	269225	17032.1	760756	298082	887334	52237	407198	499613	307664	353604	195031	238805	328628	7056.93	258084	29931.3	470517	601795	16335.9	368473	386642	858738	979034	26324.4
P21333	1395.96	570.475	555.59	2029.11			4858.29		1842.37		16910.4				792.741		2472.19				98.1973				21244.5			16167.9	1494.83				4860.08	30861.3		24172.2	37249.9	20110.8	1345.97
Q12805	1032.76	815.865	796.418	1181.39	2051.18	1363.58	1429.24	1012.39	2130.88	523.088	4369.27	1217.69	1913.58	2156.52	644.318	2436.25	1586.56	871.5	799.597	1078.19	1377.91	1208.37	1815.48	1829.86	2300.7	2229.4	1671.7	1068.99		1367.49	847.678	848.793	1123.11	452.271	1895.37	1464.19	1413.07	843.459	1029.81
P01782	189.464	2103.13	2987.54	395.928	5320.53		4005.83	601.138	427.125	369.703	1820.5	20652		2729.96		292.397	547.216		2074.1		2944.19	2485.83		2474.39	2663.28	591.319	837.254	3744.94		2729	2419.09	1172.09	4970.06	2530.49	26241.7	5283.35		1806.11	1532.7
A0A0B4J1V1	981.892	2057.04	6820.17	395.928	3405.95	86.4735	1914.92	6122.03	427.125	369.703	828.155	26900.2	1410.73	6551.88	7482.11	8025.41	3767.25	3084.31	3386.48		5075	719.472		17095.4	698.048	591.319	1069.27	3907.15	4033.59	4290.34	32045.8	3133.91	3720.98	3122.61	23413.4	3219.55	19788.4	3366.61	1456.22
P00915	10519.1	13364.8	19204.8	17148.1	24106.9	16174.8	11526.1		20227	10690.3	54512.6	16942.8	16904.1	16317.3	223.239	374.569	17414.2	17614.5	15646	13558.9	13059.7	14989.4	15389	14415.2	7442.11	13301.8	15657.4			149.181	3447.6	12387.6	14458.8	15480.8	14503.1	10994.1	11842.2	181.198	13816.9
P02743	39855.6	8764.62	40926.1	42009.9	27284.7	21187.4	42340.4	17826.1	18826.3	31321.7	25803.7	25457.9	27939.3	18063.9	29545.1	9504.62	18758.1	43042.4	27013.2	17090.6	23022.3	18213.2	39780.4	36718.5	34188	23225.6	33881.7	33571.8	276.78	22548.5	30824.6	27231.5	23379.8	28618.6	26230.2	20918	27296.8	7347.03	35893.9
P36955	30753.6	30505.4	23456.9	33846.9	32562.7	25384.8	39927.6	26245.4	18566.3	25575.6	30265.9	19846	24056.2	26786.5	26063.7	19087.6	19633.8	20987.8	24561.8	31595.6	20119.8	27971.3	30112.3	26951.9	48689.5	29887.8	30807.9	29804.3	3443.63	24142	31781	17690.9	40148.9	24376.5	33158.4	23004.7	29773.2	11152.8	40576.8
P0DOX3	425.266		7923.63		14438.3	89.8129	1490.59	813.102	8827.91		163.534	95.709		2096.55	5548.45	468.89	276.519	13775.7	2006.31	775.37	242.021	10496.9	4556.56	561.243	290.198			188.506	343.257		571.175	303.149	1340.95	444.518			5129.48	2318.02
Q96PD5	31660.6	32461.9	36956.1	32915.2	18983.6	23422.5	26242	25401.4	25941.6	19241	53497.1	39299.9	50558.3	37153	37481.5	27138.9	35014.5	38715.8	29877.6	35091.8	25079.3	38510.3	30882	40683.5	33700	39493.4	53116.7	36399.1	768.376	40809	25438.2	27971.9	45894.5	28849.5	57941.3	31539.6	32612.2	22384.7	36477.5
P00740	6360.95	7898.26	9372.32	9144.27	6180.26	4096.68	6708.39	5772.6	4921.6	3647.98	9145.33	4883.98	8087.64	5726.12	6741.67	4267.09	6013	10031.3	7158.73	7307.62	5120.51	4379.18	7693.68	8453.44	6508.12	4525.84	8448.76	4999.19	239.825	3753.99	3532.84	3698.47	9568.15	6730.68	8461.82	3621.04	4917.27	2601.68	8229.55
P02765	388840	514291	583467	352322	264131	289770	168673	318549	293868	297194	547397	321664	371454	443743	416406	175907	293422	446025	386983	260151	389587	173304	133510	170415	194238	393727	251533	211258	20848.5	431147	253170	282022	459455	422876	443315	331143	343192	360137	286551
P02750	19805.9	11751.6	30170.5	18037.4	44653.2	25722.2	19832.6	23410.3	32113.1	18027	33178.6	31223.5	45125.7	29543.8	24204.9	22514.1	27529.9	40205.2	28247	24510.2	16622.9	33939	27489	64842.3	23865.5	17419.2	28019.7	28906.2	1676.79	18532.5	29507.5	10822.5	28560	25412.8	46814.8	12992.1	14505	21739.4	12627.4
P05787	472.352			1923.21		14497.8			1307.09		605.74	1495.28			2709.6	775.199	381.209		229.963	177031	98.6865	11620.8		3344.6		3285.47	3816.08	1165.48	204.186			684.955	1104.02	648.818	1931.31			1937.24
P05543	12515.2	11310.9	14041.9	10928.7	16894.8	9124.71	11925.6	5751.67	6136.9	5292.51	8313.92	12780.3	15150.8	10535.2	11393.8	8000.51	7847.48	11023.3	10256.2	9537.31	12686.5	14404.7	10210.1	17927.8	15158.5	5891	17705	16610.2		19137.3	14192.6	11893.6	16463.1	18815.9	24813.6	14255.7	12369.8	8251.53	12373.1
P01019	42399	27862.9	35273.6	30895	30518.6	20780	53090.5	25700.1	19577.8	21460.1	17270.7	26508.1	33652.7	35405	14301.6	36078.6	23218.8	29706.1	25080.3	58909.6	34141.7	24279.5	55783.8	29617.9	28394.3	34040.6	45884.3	50047.6		53972.6	16716.6	26281.6	60484.9	50472.4	55436.1	25543.9	33769.1	11968.4	36979.5
P01602	14642.7	21686.2	17858.8	16365.3	28317	12918.3	59886.2	17906.7	17303.9	11571.8	19014.9	30643.6	43182.2	27380.5	17873.1	17246.8	16349.1	3671.75	3366.72	15017.6	17875.6	14636	20938.2	15559.9	62992.6	14833.2	47931.8	37963.8	4281.44	14463.9	49440.5	15198.1	43602.7	8594.33	32043.8	10793.7	8017.43	42494.1	14558
A0A0B4J1Y9	23881.1	24820.7	30069	14202.5	37522.3	19544.7	34056.6	7701.02	22479.5	21808.5	36515.1	33000	32021.3	26690.3	931.737	17650.5	1005.95	81700.4	13548.9	21269.3	28682.3	27015	23003.6	27832.3	37434.2	19620.1	30778.4	41734.9		38361.8	28878.2	23294.2	36111.9	1440.59	34172.3	23396.9	36348.7	34150.9	431.763
P01699	3775.11	3845.8	2675.47	3730.7	2792.69	2074.8	5768.26	2281.74	3009.35	3219.69	10131.8	1640.11	12562	4911.02	1939.26	7075.63	3838.06	1833.62	4008.98	5709.88	2516.42	5122.95	2313.55	3590.05	5109.59	1274.91	2913.38	7546.58	8909.12	6198.97	6356.34	2809.02	1402.67	2134.55	5904.58	2140.29	3362.41	5080.19	5890.71
A0A0C4DH32		1477.09	2987.54	395.928	2720.29		1121.06	601.138	427.125	369.703	828.155	18705		2729.96		292.397					2662.6					591.319		3326.7		2587.07	2419.09	1172.09	2270.68	2530.49	21636.7	1937.6		1806.11
P03951	541.712	1055.77	545.74	2142.71	958.148	122.271	366.584	966.709	680.153		2175.76	839.429	788.288	613.928	1342.63	759.037	338.051	779.917	595.761	1495.92	799.53		942.602				345.172	647.178	102.105	548.464		160.027	3161.57	805.364	520.273		901.814	3594.68	915.753
P01766	603.633	1695.15	2987.54	554.956	3503.55	188.749	1847.07	757.453	552.481	549.981	1066.61	19113.8	538.745	2729.96	358.075	662.352	376.025	164.22	157.903	306.883	3670.69	1338.74	117.557	1256.12	1320.39	591.319	1549.08	4590.7		4275.13	4244.55	1998.13	4435.6	3773.53	23510.5	3010.09	2202.13	2861.19	1802.66
P02753	73290.2	33654.7	33437.7	55788.4	47953.5	11044.6	59845.9	22950.8	23433.3	26745	24756.5	32810.9	50545.9	26618.8	33985.1	18200.5	19112.2	23985.8	25581.1	26307.3	62904.1	43924.1	34744.5	46285.3	60790.5	17201.2	59398.3	46372.4	1161.31	34903.4	42101.2	25063.8	67973.9	65375.4	53060	42787.2	47612.8	21234.3	44773.6
Q92954	1949.13	2610.93	4518.4	1922.96	2969.49	20988.2	4715.62	453.071	227.648	1866.35	9104.67	1229.67	1255.3	130.792	3698.01	1620.1	3900.93	2000.55	452.491	2782.99	393.735	268.471	6861.57	1563.66	2574.82	1231.06	2905.07	41949.8		390.469	780.552	661.798	2378.2	10668.1	851.827	202.412	2326.61	3521.9	2765.85
P00742	6964.49	3592.72	9133.07	8589.02	4972.49	4362.53	5885.17	2017.68	3372.01	3071.6	8663.56	4791.57	4839.35	5568.81	6608.3	4176.93	2823.6	7211.81	4310.7	7082.25	4939.43	3386.76	7720.62	5121.17	6154.36	4944.9	3194.41	7367.24	2432.06	6405.72	3576.42	4108.07	5582.87	3893.03	5418.22	2858.96	5176.97	2317.6	7288.14
P15169	5515.11	5028.81	10587.7	5872.46	4979.43	2971.75	5604.35	4611.35	51057.7	3161.25	8881.27	5374.81	9369.63	4653.04	7159.71	6359.9	4291.81	50889.8	44785.9	38998.9	34387.8	3170.15	8720.73	2555.91	5342.33	6219.23	7563.09	4278.73	1593.98	5389.97	4716.14	5561.25	9111.57	43464	8548.57	2644.63	31774.9	5136.36	50702.2
P11226	5413.26	1345.08	344.942	336.194	11710.1	2468.81	590.332		261.214	2022.09	7019.02	2048.58	1178.29	944.876		108.17		3722.38	2655.69		3677.74	3195.71	869.506	283.268	468.605	8458.71	3770.79	2159.08		3068.3	329.406	518.082		1725.83	881.517	3573.23	274.489	2542.94
P01591	76356.6	62017.5	123419	35724	74758.8	70116.5	53901.1	50077.6	48958.4	57069.1	40058	55872.1	67536.9	45343.5	78752.5	46316.8	60984.3	35815.5	71617.9	89752.9	62609.5	95908.1	33567.9	63810.9	77887.2	54810.5	48848.5	58294.8	4783.52	56317.7	37034.7	28332.3	91065.7	65963.8	90792.5	81183.9	77773.8	58061.8	50846.3
P02763	235810	325098	602740	418600	672504	301410	337180	326464	358646	251886	230833	366066	244436	266865	214509	171089	220878	437254	318840	364905	236265	320149	220612	479689	273116	198501	282833	288548	21153.4	205010	217686	76252.8	252202	165682	242159	241479	86886.3	142833	334730
P07360	19840.9	22335.4	30139.3	29353	25281.3	20879.9	22800.2	17676.2	21372.4	15844.1	29484.5	15750	22955.5	18912.8	20011.6	19174.3	17806.5	29352.3	20257	23526.6	6063.37	15410.4	28173.3	30493.2	23730.3	26619.5	18496.1	17511.5	993.004	19033.5	13258.2	14004	25144.3	19880.5	29919.5	10826.5	16055.9	10800.2	20427.1
P08185	53497.6	54540.3	67321.8	55272.8	59506.5	35844.2	39815.2	36896.9	47665.1	33408.6	61533.1	46365.5	56318	59677.9	50377.8	54939.9	54828.5	61930.7	44584.9	60854.9	59289.7	34463.3	61621.5	47362.8	53440.5	50840.1	48455.1	47901.9	3882.97	39941.2	50193.4	38781.7	63424.3	49773.8	53347.5	35138.5	47659.7	28397.7	45608.7
O00391	59371.2	58912.8	159518	175484	792.068	40026.4	106034	114356	91392.9	52744.4	37729.8	315.151	289.134	558.719	79665.2	165895	49330.7	119289	129172	367.775	404.825	166.069	195637	74641	58399.5	609.434	55671.5	584.432		90.1648	668.951	131.381	192642	315.885	55448	648.701	70346.3	307.587	113029
P18206		29346.8	102.284	40663.2		4417.71	487.806	32022.7		3135.38	41647.6	31497	46664	33023.5			44923.7	645.546	8493.24	28711.6		39156.9			190.058	29492			12834.6	37041.2			60618.8			30854.7	289.366	31800.6	53721.2
P19652	153070	147834	81658	130783	209350	98307.4	38533.9	89264.7	134173	59029.7	139270	137112	176217	121130	119660	123507	150428	199563	85240.4	105726	171837	72957.3	139442	223581	123602	35867.5	117164	107352	20329.5	97318.5	78567.9	132178	86938.6	121274	130087	90174.4	81194	43567.8	79126.3
P12111	71.0973		347.665				5344.2		446.286		412.631		11884.1	12714.2		918.966		81.5846	99.6802	44.954	7569.34	115.872	320.136			5933.36	277.608		24.6583		283.702	5016.73	1858.46	678.206	41.306	1498.84	10846.6
P02766	20767.2	28726.8	37440.4	30815.9	6526.5	8052.28	29561.9	17025.6	14942	13823.5	20492.2	16255	18022.6	16742.1	32470.5	16954.6	25049.6	22575.1	14742.7	23957.3	17482.8	6392.33	31681	12306.1	8651.46	24177.6	13963.5	10701.2		9495.07	6454.35	5143.84	17432.4	10364.5	12352.9	5411.18	12194.5	1485.76	12428.2
P05154	4027.28	1544.57	449.774	466.389	396.645	162.601	2391.49	411.945	215.432	543.527	2953.93	4175.68	1089.57	494.225	2048.91	1606.3	360.003	1923.05	1452.35	1034.44	865.183	1594.23	786.708	5906.66	3978.46	1220.26	1561.6	2119.3		1131.18	7149.81	2974.81	2823.89	4424.92	6976.72	4065.71	3873.68	187.589	806.278
Q07954	460.893	2215.65	1431.7	2051.5		3221.46		97.3498	2575.57		4244.1				771.343	2449.85	2379.16		1467.28		3125.45	3676.97		4289.08	4256.78			80.7731		4091.22	4327.83	3644.31	3332.02	2934.83	3010.14	4946.4	2966.71	1565.19
A0A0C4DH36	318.945	1019.96	870.109	395.928	215.261	387.571	810.946	582.543	1066.98	464.896	1551.6	571.708	1447.89	1658.85	1227.68	1421.17	702.445	996.436	4674.3	1671.36	31305.9	274.339	382.422	364.438	2847.11	242.595	2567.23	1407.64		1452.78	2136.78	1937.06	2578.75	2029.09	2702.34	2131.73	2300.13	4845.73	302.734
Q7Z794	4769.09	388.833	753.392	9271.55	904.345	37460.1	219.173	1299.54	2157.45	3258.9	4328.57	1455.36	1476.94	936.745	10347.1	4956.18	2086.53	757.194	675.499	294685	2032.04	31999.3	1945.52	1150.77	1109.58	11317.8	13041			254.99	724.746	3529.07	5892.3	4109.62	8696.73	3211.04	115.038	7109.67	177.792
P0DJI8	1376.36		190.283	1142.61	29388.7	30151	786.778	732.384	313.094	83.652	2381.34	203.173	373.011	273.122		147.964		1902.99	161.385					60396.9				843.051		309.458	2416.36	111.069	2143.42		72.7865		384.693		370.051
P11021	364.332	175.713	113.095	601.831	393.885	59.2933	258.492				220.579	70.9137			43.9254	4539.45		30.6147		1563.7	102.206	196.415	129.689		7088.8	72.4449	147.765				3858.54	5637		40.1433	113.911				212.185
P0DOX4	508.957	925.384	910.057	949.353	657.336	1025.32	956.426	1252.3	1440.71	762.648	3695.97	56288.9	3380.52	2143.81	811.972	505.859	1231.11	1831.14	485.29	830.304	1525.3	1067.36	1563.38	3482.28	4495.66	1080.41	1480.88	3032.71		5113.26	2119.98	1093.81	3575.74	1223.19	2587.83	1957.21	1273.41	5963.35	1228.63
A0A075B6K5	24903.3	24057	25103.4	23234	8698.95	35090.6	29522.4	29062.5	25195.5	12997.2	13661.4	35794.8	40315.4	25063.7	16689.5	38146.6	43910.5	40171.2	31536.6	15048.2	26009.3	18272.5	23060.2	44189.8	33873.1	10571.5	21166.1	20167.3	4796.12	37904.8	36543.4	37558.1	30054.3	17599.6	50528.2	74404.1	13632.5	36632.1	31188.9
Q96IY4	4345.8	4147.23	33706.1	2904.92	4699.53	4305.1	3256.88	2461.75	6341.1	2700.09	3662.44	4227.28	5198.13	4741.56	4106.2	3549.18	2836.66	5277.77	2365.7	2704.07	3030.64	2604.96	3590.57	3168.37	1386.91	3259.05	3737.3	2569.91		1840.67	2593.81	2556.15	22446.2	4569.73	6758.4	3105.15	2563.87	2948.33	5800.54
O00187	6623.9	2699.33	1331.39	5201.32	3752.05	1072.63	1918.07	36616.9	38291.5	528.472	1287.66	21557.8	2011.1	816.628	1177.6	681.449	106406	783.968	538.916		9490.03	9572.84	1301.83	748.553	1002.85	638.712	443.356	3969.45		363.138	1101.51	17032.6	9593.39	67721.2	1188.35	1015.78	1103.97	21577.6	2483.16
P35542	18906.6	8102.05	24043.9	20255.7	28818.9	10993.6	6116.74	27083	16429.3	22905.2	10266.4	20238.7	17584	22676	20133.5	8977.63	18393.7	19508.4	17039.5	18693.3	22748.2	17283.7	15476.1	16361.9	19571.5	10184	9146.17	18072.7	15750.7	20006.9	6997.99	14804	25935.7	20919.1	26746.8	13436.6	7940.54	7431.71	30748.3
P35443	163.063	754.475	1398.33	622.619	259.391		1253.13	479.495	335.693	204.865	3769.65	639.18	957.902	125.561	678.292	588.858	1192.31	881.574	225.842	598.591	421.896	158.954	589.007	303.14	601.432	1047.52	615.141	110.906		847.461	106.739	595.312	365.518	195.115	1352.24	1307.35	640.971		258.676
P0DJI9	1111.41		190.283	934.522	16918.7	31752.9		546.3	313.094		2684.91	203.173	616.765					888.154	161.385					34449.9			541.022				1965.48		1962.49		72.7865	1656.02	112.491	290.033	650.128
O95445	13854.1	11148.9	17605.4	8092.04	6627.59	9713.23	11154.8	10324.9	7626.46	9866	15792.6	10283.3	12328.7	12903.8	13071.3	12465.2	12223.6	16762	11975.8	15409.8	13874	8746.4	15150.3	13856.2	11087.2	14181.9	10075.7	10570.8	1175.69	12053.4	11388.3	10191.5	17716.6	11581	14500.5	11066.5	8940.3	16098.2	16295.2
P17936	2141.2	2587.25	2727.26	3184.66	1342.62	166.513	855.583	2201.32	1218.3	2497.69	2986.93	2143.37	2576.48	2038.13	2893.44	2874.03	1462.22	3408.33	2700.34	3031.67	3098.78	2058.77	2342.33	2312.85	916.247	2389.47	2961.27	1432.56		2093.06	619.521	1562.65	2387.36	2482.31	1501.06	896.966	476.026	518.62	2119.61
P02652	204002	42611.2	265550	254555	5587.26	5773.02	15495.7	69196.6	199040	184545	46891.8	18369.5	242463	27618.2	33745.5	207958	55758	277003	189390	34843.9	23240.4	24679.5	277015	182974	8933.47	23582.5	196626	70408.9	163990	222622	11233.8	6538.47	263336	18524.2	13170.2	173965	220601	11219.4	264809
A0A0B4J1V0	25892.5	25119.6	33070.4	15007.5	39438.4	19992.7	24185.8	7462.27	22812	22039.2	32528.9	30162	33261.6	28582.5	1524.84	18762.2	1647.15	18675.5	14283.6	22245.5	29360.6	31416.3	23416.1	28005.5	32567.8	19650.2	28528.5	42253.9	1197.42	40868.4	29876.1	21592.4	32597.2	1603.83	27217.5	23985.2	35864.7	32579.7	2211.56
P01700	20220.4	7908.3	22351.3	11912.5	19910.2	10127.7	17232.9	12281.4	11331.5	11146.9	29143.1	5808.73	28119.7	4911.02	12219	17872.8	14198.9	9787.28	11395.5	19150.9	17726	16056.8	13582.8	14387.3	22398.7	9064.51	5214.31	23551.4	9163.07	20104.7	19198.7	8759.47	17997.8	11518.6	26059.7	10580.1	14033.6	17052.8	16329.7
P13796	102880	99194.2		10116.6	110335	1449.01	201801	58570	24814.7	9382.36	34280.5	136179	228.171	27380.8	70348.6	15122.7	73744.6	36197.4	1720.57	12601.7	203939	91755.6	121688		52219	12082.2	134492	216971		193.224		8554.55	71099.9	32796.5	27991.4	48184.1	89376.6	16387.4	82507
Q9UGM5	3365.54	3986.35	4992.64	1891.47	6225.81	3848.48	4581.33	640.788	2965.92	2900	10386.7	3351.63	4798.51	2957.04	5177.14	3565.46	5887.53	5481.65	4221.77	3659.51	6379.71	5147.29	3662.15	3541.01	5003.29	3872.11	3117.74	5859.43	487.18	3199.97	2340.84	3629.35	3954.9	4287.53	6571.92	818.938	2769.81	2132.51	5034.39
P01701	20607.8	34623.7	17674.3	11631.4	21307.7	30893.5	26599.5	27502.2	29049.4	17638.9	20087	26026.8	26600.8	29755.8	20092.3	24159.9	18264.3	23879.9	30719.7	14318.7	18964.5	33466.4	12441.1	38589.8	23729	8288.13	285.744	24383.7	4935.48	18464.8	25933.6	8173.46	22960.4	16428.8	39634	5168.5	23657	39613.1	22749.4
Q9UHG3	328.989	27247.8	504.914		446.943	302.29	217.378	240.003	160.361	399.716	1003.65		69.4018	841.931	646.149	541.445	789.704	551.53	582.739	362.984		197.901	1383.29	381.773	229.044	650.744	405.299	198.724		514.033	382.897	15071.5	1108.48	384.023	1201.8	364.251	374.565	216.1	240.115
Q02985	10523.9	25526.7	18239.9	12356.2	18437.6	9564.67	12181.3	9790.4	10895.5	9386.38	23908.9	6056.59	9162.56	13372.6	6956.22	11667.4	21536.7	27258.1	6075.22	11967.7	6695.98	16556.4	12579.7	7685.83	13147.4	11420.6	10771.9	11817.2		9336.99	6094.66	8438.58	12763.2	18563.2	14223.9	8818.66	10719.2	6464.65	11621.1
Q9NQ79		491.312	796.05	203.5	54.8269			106.046	273.42		932.299	491.435	1015.64	631.012	343.376	286.148	562.485	87.3868		485.031	1032.08	152.575	768.713	133.224	309.166	220.7	874.087	382.737		1761.38	52.2784	246.794	783.092	755.959	443.119	376.656	389.136	225.256	166.859
A0A075B6Q5	408.425			395.928	923.693	146.402	9498.25					164.259	72.4648		4758.53	487.388			4674.3		337.42				107.035		2250.98	294.84					262.522	115.93	239.118	236.018	1870.54	4818.67	445.05
Q15485	1696.2	763.234	2291.59	871.859	545.998		617.008	725.027	166.68		594.322	893.531	1246.63	498.967	656.576	497.598	385.092	1791.59	386.124	1804.79	647.902	984.307	1678.55	254.479	24402.4	343.534	373.083	740.724		631.668	318.906	86.5928	1051.72		903.623	56.646	83.4834		1106.73
Q9BXR6	6135.78	6902.05	7817.41	7035.86	8529.37	4579.67	8797.39	2374.05	4387.62	2096.69	4692.45	5345.27	8344.91	5823.01	3077.2	3350.64	2227.54	4039.71	3031.12	1699.02	3464.51	5028.32	5322.87	8513.98	8652.86	5188.18	7238.2	6678.13		5478.93	6062.74	3588.66	12466.2	8067.76	4971.43	4878.18	5473.2	1211.62	6461.3
A0A075B6K2	12718.4	14922.3	11723.7	12861.5	7211.22	23912.7	17176.3	18683.5	13740.7	11259.1	12580.4	16149.2	19113.7	12774.8	13657.1	21946.1	22488.1	17343.5	13387.7	6543.14	8705.29	16664.9	13543.2	38639.5	16342.9	5549.03	10997.9	17180.2	4712.79	13454.3	28751.9	12958.2	19349.3	8335.66	27938.1	23304.7	10842.7	24561.6	13804
P05783	708.15				438.296	3517.67	1922.12							559.859	2828.63			196.729		17942.5	1815.74	4628.52			1131.34			1994.48		1521.74		1906.86	2018.21	444.583		2670.15		2231.55	991.91
Q9NZP8	4976.02	7443.77	9835.08	3934.06	7636.64	5200.58	5719.88	3676.7	6142.99	5365.24	8609.28	3497.19	6917.65	5172.49	5703.45	7557.2	7284.73	8323.64	9232.93	6977.81	5849.73	6417.35	7265.92	2169.8	6768.08	7403.16	5563.95	4614.24	432.408	3781.04	6383.28	3022.93	7841.98	6709	6356.09	8287.6	5508.09	2194.89	5171.83
Q13790	6668.56	5036.66	13253	8756.72	3722.02	6462.79	7340.61	7131.67	9695.59	4981.52	7370.25	7678.96	9882.93	8947.58	5925.39	12401.3	9348.87	6978.08	8623.89	5928.91	6626.42	5679.59	9195.67	10762.4	3870.12	5523.37	10363.8	5769.88		7046.09	6053.29	5331.44	6055.81	9159.77	10794.7	8362.58	6612.32	2569.06	6883.95
P06276	25213.5	21503.6	22180.2	23639.7	22979.1	18024	23598.9	18333.1	19714.8	19944.9	24550.9	20242.4	23886.9	24171.2	20076.4	21320.3	3093.8	20353.8	3417.8	22958.7	24271	21364.5	23578.7	17605.2	26380.6	18503.7	22717.3	23593.2		23715.7	20097.4	19616.1	22825.3	28139.6	28148.9	1679.51	26215.7	21129.6	23268.8
P06312	1389.98	2748.61	1348.04	1299.7	12280	2322.66	7706.01	3430.91	115.116	1879.75	3414.55	4942.9	6066.35	4003.86	2241.38	1996.96	2224.35	2427.29	1494.22	1741.12	521.18	8218.31	1937.31	732.309	1068.34	1019.9	9431.9	1277.95	20496.7	226.448	652.193	361.793	11942.6	5874.33	12019.5	158.979	8295.27	324.69	210.905
P80748	24903.3	24057	25103.4	23234	8556.29	35090.6	29388.8	29062.5	25045.5	12997.2	13661.4	35794.8	40315.4	25063.7	16689.5	38146.6	43910.5	40171.2	31536.6	15048.2	26009.3	18272.5	23060.2	40010.9	31087	10571.5	21166.1	20167.3	4796.12	37904.8	36240.9	37558.1	30054.3	17599.6	50528.2	74404.1	13632.5	36632.1	31077.8
P43251	2401.77	3775.36	1759.4	4381.41	1093.4	2284.81	1321.73	3440.5	2752.35	2663.65	1109.91	1921.13	2373.65	1653.98	3321.65	2199.62	3345.34	2564.89	2423.38	3188.83	2507.1	1745.86	1668.51	4337.91	2582.32	1517.98	2122.4	2386.33	465.25	1543.94	1730.41	1373.06	2230.75	1369.53	1392.33	1822.74	1621.08	2736.85	4085.7
P55058	1383.38	1239.21	1856.31	363.757	2139.86	1475.29	1488.35	1611.57	1415.17	520.6	3308.78	1515.49	82.9779	2150.96	1622.62	815.76	1108.93	2108.14	855.771	1022.64	1290.06	1200.55	192.202	1460.63	1156	2613.39	1363.4	1747.38		1750.65	1945.02	826.185	2171.44	55.0052	1369.58	1761.61	896.403	1266.32	1065.07
O75636	5685.65	8550.76	7434.55	7561.22	6175.65	7050.78	12329.3	5129.03	3756.99	9136.83	5009.72	5489.51	12075.8	4837.69	5518.28	4726.38	4446.09	7167.41	10270	7941.14	7555.15	17062.3	16700.6	8114.63	6105.97	9406.36	6844.39	10533.1		7023.12	6550.36	5505.63	6578.7	6058.54	5012.75	3423.51	7206.14	3217.6	11022.7
P07359	655.824	304.127	1720.24	539.318	1204.99		1261.48	118.01	330.087	7590.15	525.188	401.933	978.78	943.198	671.898	347.562	9022.77	633.662	768.525	832.298	188.389	2745.41	844.374	488.756	612.415	205.137	835.812	614.021		519.014	158.45	147.903	153.683	161.806	494.195	143.313	217.05	269.245	511.822
P49908	6623.9	5852.03	4793.82	2142.64	3240.4	4830.48	4238.4	3095.03	2134.51	2756.7	4877.78	2655.69	3043.03	5968.11	2569.29	3701.34	4772.15	4774.91	3531.92	2283.48	3158.77	3418.44	6022.16	2922.39	3240.82	4877.3	4341.69	2854.49		4138.76	3660.07	1071.46	4880.89	4395.84	4110.17	482.71	6603.89	1842.96	4520.33
P07195	2036.92					132.648	181.021		3099.38		322.55	7839.87	300.033		128.341	4247.54		5201.21	130.979		474.326	2132.71	439.952		220.671		687.568	5193.26		4066.14		329.27	344.863		82.823		1743.74	521.598
P04180	2053.59	2998.86	2933.59	3271.05	1125.38	1804.82	1475.72	1440.75	1602.13	2337.18	3299.57	1460.49	2446.58	1848.57	2077.66	2998.15	2514.7	3989.28	2280.78	2784.47	1444.01	1028.41	16979	1707.6	2632.55	1574.31	1063.71	1839.1		2543.11	1473.57	1169.62	2158.31	36946.5	2227.71	866.165	832.971	753.855	2026.37
Q9UK55	1183.15	2555.17	6559.76	2941.36	1802.34	877.504	1936.57	1498.27	2047.62	2510.31	2477.87	2075.11	1340.89	1475.5	3921.66	1375.86	2424.88	3374.67	870.379	2681.14	756.809	836.894	1679.02	2717.13	1400.64	3228.46	2372.82	852.958		1221.31	757.407	260.644	2962.04	1372.21	1556.17	289.089	1237.45		1532.79
P69892	11523.1		116.814	312.534	1071.96	6101.45	6647.62	1714.83	95.6827	230.643	2638.32	14632.6	5874.62	18710.9	5819.2	30504.7	4879.67	3712.32	10245.8	700.237	1757.45	115007	3875.76	11518.5		11131.2	9251.27	910.678		163.346	3883.11	1201.1	2543.78	1462.67	3814.05	1851.74	19223.3	20497.2	1945.14
P18428	4018.8	2619.32	3172.4	840.425	4180	1409.06	1804.98	208.392	885.325	795.89	1268.21	739.943	800.63	114.346	3437.99	459.24	167.539	10673.1	543.181	541.642	283.804	358.245	1164.03	2758.4	1235.62	119.227	1330.65	292.13		652.194	255.006	164.105	556.003	5118.11	857.644	4927.68	638.257	466.221	426.187
A0A0C4DH38	4571.91	1820.43	2749.43	1726.83	3037.51	1682.21	2548.9	344.992	1610.87		4124.08	2781.73	5389.22	2982.03	1969.78	3091.74	2719.22	3150	2133.93	3309.72	3228.59	4841.74	2121.94	4681.44	10074.6	1569.46	4871.27	4943.03	738.406	3487.58	4438.61	1619.27	2880.48	2666.99	3979.01	1647.95	3706.4	1842.86	4176.23
P69891	11523.1		116.814	312.534	1071.96	6101.45	6647.62	1714.83	95.6827	230.643	2638.32	14632.6	5874.62	18710.9	5819.2	30431.5	4879.67	3712.32	10245.8	700.237	1757.45	115007	3875.76	11518.5		11131.2	9251.27	910.678		163.346	3883.11	1201.1	2543.78	1462.67	3814.05	1851.74	19223.3	20497.2	1945.14
Q562R1	654.089	1795.77	1306.59		1187.89	165.705	1121.87	340.498	397.809	559.837	2164.16	384.272	699.176	1645.49	238.467	835.703	1691.37	557.393	360.589	1554.85	406.956	2310.7	318.881	640.536		708.25	867.419	849.049	1807.09	402.247		113.394	476.052		405.044		578.843		446.502
P19320		52.4082					31134.4		205.209					74.9774	15964.9		29794.8		22316.6	90.2581		18235.7	29083.3		112.477	38705.7		10530			27.1355			7892.15	133.135	163.954	93.5689
Q9HDC9	178.677	768.958	69.1565	377.595		1476.7		414.78	46.3636		290.136	139.581	453.666	538.876	338.259		167.686	430.964	841.523	260.491	745.673	545.828	127.347	1343.36	75.5894	302.579	153.172	63.7499		853.138	249.781				997.277	52.3244	346.164	179.772	546.294
P22891	381.514	461.464	1546.1	1468.14	220.534	512.297	589.314	70.7543			717.313	149.036	135.388	202.073	508.259	318.673	810.056	481.811	353.23	665.826		180.958	915.774	235.821	192.744	376.796	480.25	599.219		149.525	68.8472	140.848	274.395		841.159		582.692		1159.54
P04278		371.505	200.047		1173.97	360.224	141.408	152.326	191.627	229.562	3353.53	108.076	836.159	1088.62	87.0893	161.196	463.629		1663.91	240.396	178.473	2835		4880.42	177.082	2139.39	1521.56	142.961		2045.99	1236.93	117.549	570.662	550.732	1654.53	1019.78	751.48	1834.98
P00746	734.883	1140.33	842.533	1118.51	1293.71	471.641	2014.86	485.967	1288.7	185.085	1314.53	694.632	1031.41	1093.59	1281.39	1007.26	550.949	897.637	811.706	630.871	125.374	677.076	938.422	932.259	1444.69	838.03	962.817	233.691		662.196	853.335		900.572	389.783	440.038	879.877	774.229		79.0847
A0A0J9YX35	1864.4	167.989	904.228	594.248	1422.24	127.937	2106.57		595.749	76.623	1250.45	850.336	1724.15	218.279		487.388	660.875	828.312	5278.91	515.573	1503.47	982.915		1868.04	2666.75		1155.64	1594.77		2373.71		181.915	1908.12	2028.77	1080.44	1019.23	3333.04	6664.53
P02775	22626.2	33104.8	30773.5	39610.8	43662.5	9531.61	32419.9	33839.9	20897.7	23836.8	26265.5	27577	22438.9	16350.1	35402.8	22246.8	41406.2	32106.7	28550.1	19143.6	15223.9	17685.6	31208.1	26946.7	30053.8	21312.3	30792.9	47811.2	4846.48	58684.1	12434.5	8677.93	35002.3	33844.4	80596.5	50107.4	22134.1	43087.4	32796.1
Q01546	345.497			1103.3	94.4201	20497.3	252.555			340.469	1845.62	162.754	149.284		1967.64					147639		10832.9		162.69		3596.7	3991.9					106.062	936.44	1376.24	337.211	339.326		850.024
A0A0A0MS15	1791.7	37.7805		395.928	1670.32	300.681	885.464	223.333	393.068		28.2476	522.975		290.356		292.397			115.043		2546.84	2754.43		2266.64	1258.69		1550.86	3032.5	61.1225	2378.67	2479.58	1108.1	2363.29	796.235		1074.53	1688.15	2183.6	1593.35
P08727	1656.56			661.481	775.19	14021.9	170.837			687.607	654.39		421.953		8140.59	1102.01	515.508			128350	880.061	13111.5		50630		2923.16	4439.87	1259.21			224.996	1435.96	2439.56	1957.28	4821.67	1690.15	90.275	3760.36
P13591	16048.2	115.725	18392.7	18391.8	38907.1	13649.6		8249.54	15224.7	7180.62		12570.5			14818.2	12634.4	10519.1	12035.3	11400.9	13904.9	13689.4	13687.1	91.6039	14746.8	16844.1	113.314	16410.4	98.8909	959.533	13232.7	13629.2	50.6485		15426	20091.7	12382.4	15441.6	8392.2	16862.5
P08571	658.964	835.974	1279.11	1778.16	2022.72	476.799	1061.9	604.22	425.973	106.074	1855.38	1293.67	701.774	538.135	1284.34	331.913	394.224	949.17	693.92	436.924	961.696	1068.09	600.353	321.186	241.67	1171.54	1257.24	2089.93	341.57	462.445	2253.49	112.703	533.494	514.365	1867.42	512.359	1972.35	323.463	3343.51
A0A0C4DH72	722.13	395.277	642.175	239.061	934.555	56.1325	1199.2	225.847	422.702	225.856	545.411	872.276	680.781	316.712	245.867	52.2042	460.354	210.082		290.568	719.556	1028.87	230.686	487.361	678.609	194.073	703.991	909.787		869.952	644.009	493.263	485.111	378.677	713.997	344.621	527.693	624.05	942.851
O95678				801.603		6339.36			1307.09	154.824		1495.28		150.011	1522.01					173080		6613.34				1516.4	2695.56	921.819					484.824	785.764	337.211	202.909		720.452	1097.98
P32119				664.106		135.333	781.988						151.753			76.4537				1218.86	218.57	1590.1	282.154	49.7303	282.626						211.178	89.4985	1616.47		432.135		431.031		148.568
P02655	72758.6	51155	93090.9	44542.9	35768.3	22765	38727.9	29267.8	32182	48683.3	54186.7	35037.7	42375	19037	38331.3	29094.7	26462.9	47415	41121.7	78219.2	19194.9	31569.9	31411.8	35781.8	60539.7	55537.3	29236.7	44034.6	10719.6	34575	30611.5	23455	84675.3	41213.1	46599	13999.6	75847.2	40404.2	101323
P04070	1107.91	46317.4	2517.86	1662.62	193.223	12524.7	1422.16	45934.4	562.467	700.466	1672.86	507.6	2375.19	347.55	1943.19	1236.24	2082.24	2655.15	480.754	1332.51	681.55		2722.55	651.442	1585.94	1178.23	43490.3	1106.85		92607	684.07	1067.01	1674.34	608.253	1470.87	255.231	1127.91		2748.75
P33151	468.269	1274.49	356.004	525.493	767.733	134.498	413.063	165.833	800.425	261.363	2125.33	460.086	972.796	571.819	444.332	434.973	437.432	11038.1	304.476	797.065	617.927	281.108	706.729	509.387	533.906	1526.69	318.014	756.409		686.205	348.368	305.466	661.748	205.972	646.783	329.642	350.516	48.1928	250.209
P22352	4499.02	7841.73	7465.24	10630.2	8656.69	10154.3	5085.27	7592.41	7515.58	4958.15	6675.14	4765.24	7508.59	7131.7	5799.24	6230.34	6176.42	7197.05	4095.57	2753.2	5619.87	5080.35	9095.42	7387.81	4885.05	8395.87	7994.73	6807.27		7227.36	6664.77	4813.18	5211.16	5939.09	10852.2	7563.27	8373.6	6606.37	6358.1
P09486	238.589	332.947	559.898	557.365	1360.02		1010.28	86.9449	258.425	201.187	384.994	482.672	631.734	460.213	541.527	378.769	590.31	499.889	558.41		139.949		524.609		332.594	615.566		377.173			86.3708	318.124	246.054	248.402	340.633		526.889	199.212	1302.24
P43121	7709.49	40541.1	21356.5	16640	4501.56	19786.2		54643.8					24226.3		25763.8	35780.5	33751.8			28908.3	5817.41	100.173	42333	134.946		32639.5	105.65	6827.39		90.7275	8900.48		6124.64		9748.99	6165.68	5987.75	3963.2
P55056	2195.8	206.558	3783.03	557.559	365.098	724.099	5787.54	363.444	80.4803	696.274	1034.84	542.039	734.311	1426.08	4806.96	697.71	2192.14	2268.01	3224.69	3299.15	1876.48	1791.03	3887.96	1349.23	4795.11	998.725	1642.22	1998.15	279.068	615.255	291.156	2506.96	8923.19	569.53	2048.32		3409.71	347.617	7174.73
A0A075B6J9	2011.29	2180.89		816.996	1814.49	720.665	1344.07	800.565	334.135	511.723	844.366	1471.98	1662.05	1285.41	1344.22	272.02	2606.68	1650.86	189.328	856.858		735.944	909.403	1865.35	2083.46	235.87	658.554	1218.37	8909.12	887.271	2058.99	569.624	426.01	578.134	1705.54		1469.71	1207.38	2086.94
Q92496	137.288		1803.39	454.883	2276.23	166.459	16812.7		721.183	953.996	5353.2	17603.1	1021.11		751.241	1841.52	669.474	236.299	1593.13		4088.17	509.868	444.299	234.622	60357.5	105.844	196.121	21980.7			49348.1		826.619	5204.08	455.256		24832.5		602.574
Q15166	7261.36	7429.57	10879.2	18106.3	1610.83	11324.7	6510.92	5766.66	7719.03	12859.1	9863.9	109.935	12847	15684.3	8106.65	13153.8	9039.3	9473.96	10110.6	5225.44	11175.3	3505.29	11631.9	5611.73	3399.32	14903.6	1386.56	1918.15		9219.67	6919.25	10628.6	6811.98	4540.63	7007.08	5135.72	3730.89	10305.4	7454.23
P02776	11636.3	18277.6	5088.94	19278.9	21325.6	2140.59	12984.4	5638.84	6622.89	14463.9	10025.1	5377.93	10487.4	6033.86	17088.4	10022.3	16212.2	15633.8	12382.4	7106.89	13692.1	6481.94	22052.2	9410.37	5052.24	1875	14439	12293.6	4762.01	12470.1	1495.96	5727.57	14553.6	16655	8278.22	7862.7	10978	12436.5	6809.08
A0A0C4DH35	9176.99	1142.07	479.05	743.903	5717.56	701.792	2314.18	1110.95	424.187	160.934	994.454	46.6441	2078.88	1478.96	801.714	159.38	484.37	851.259	211.104	1370.59	5153.63	9433.15	297.922	4813.52	5042.32	760.475	4906.81	558.689	211.438	5536.98	304.444	617.788	5132.21	3475.94	390.247	3045.22	245.489	4507.21	5592.7
P78509	1880.43	1002.45	1386.63		167513		69024.8			90839.8	1957.25	1907.54		1304.83	2217.65	2275.97	72611.4	31501.2	114004	109693	1292.62	79705.9	2217.21	777.341	1279.85	1336.13	2016.25	2364.01		1438.24	1081.61	101569	1929.77	110168	1607.4		80599.2	1404.01	1941.54
A0A0B4J1V6	24939.7	24398.5	29612.3	14202.5	38867.3	19738.4	23893.7	7549.93	23589.9	21567.8	33757.5	28382.5	31868.1	36615.5	12845.5	17650.5	792.046	18504.4	13663.9	38156.8	29131.6	28557.9	23003.6	28642.7	31757.1	19284.7	28993.4	42124.1	61.1225	40443.6	30133.8	22116	33493.1	1517.28	24870.2	23773.3	35613.2	32991.1	1593.35
P02654	59020.4	52616.8	64585.9	2466.89	18739.6	56471.6	5639.13	7279.15	65612.2	56219.8	74206.9	42657	63281.4	59356.6	4848.17	71711.7	3802.4	100454	64502.6	59047.4	67483.1	61059.9	113224	72568.2	4519.17	2439.93	62148.7	42349.2	3868.4	44126.9	2381.83	35102.4	74261.9	3947.56	38710.3	31217.1	59871.9	2507.24	65472.4
P01619	5121.42	30614.3	24847.3	24075.2	35443.6	455.657	20996	29890.2	24935	27391.2	5743.58	40180.9	54653.6	33897.9	27030.3	28582.8	22542.8	38540.9	17052.3	19449.2	46391.2	64123.9	37906.9	10957.6	54490.8	21554.8	48609.6	15871.2	627.779	44256.3	56724.5	57046.4	67491.7	28899.1	68065	32914.9	55853.6	60439.5	55831.1
Q13201			116.319	147.591	148.85		1246.7				115.632	105.178		83.6527	79.2216	114.022	152.555	103.142	133.978			102.926	325.058				313.453			1145.26				2139.4				325.875	2034.1
P02741			564.37		19086.9	4564.43	1351.65		1089.13	2509.88	1169.42	99.0148	313.167		116.868	535.794	240.831	7376.78						16128.4	196.297			396.579			761.641		578.838
A0A0B4J1Y8	3569.84	1228.31	361.308	210.234	2799.14	1475.94	1578.17	1165.8	406.132	1000.21	210.553	3139.56	149.154	1024.49		3648.48	2566.08	1113.78	1069.29	1133.79	1670.96	2677.02	341.406	213.965	1540.37	709.428	1574.6	3348	1003.92	2319.6	1232.43	1678.12	823.299	1158.71	85.8488	681.647	1095.55	3523.07	178.376
P15814	917.382	762.284	1445.6	751.678	976.531		1703.85	1460.29	2069.11	1360.94	1309.31	1222.16	990.076	806.384	716.018	440.557	814.951	826.595	322.872	780.633	511.008	194.357	2379.6	3038.42	2867.01	693.514	1326.85	531.565		487.395	351.875	1356.2	1307.91	281.822	1564.43	312.475	257.056		1233.51
P02745	7398.54	7121.91	9902.74	9587.06	677.557	7858.59	757.923	6519.74	7214.61	6832.02	9570.33	6836.1	8138.61	7794.86	6972.15	7839.99	7080.53	8092.92	7520.87	8073.86	7816.08	9851.4	8140.45	5704.45	8339.58	6960.52	9659.11	8701.8		7888.41	5952.28	6299.06	560.98	7128.55	9193.04	6407.75	6178.67	7475.2	7270.72
Q8WZ42	162.524	35139.7		6263.26			24199.8	55681.2	1124.07	40763	61332.7			67.9786	246.195			4486.78	251.938	99.8458			339.125	31494.8	7645.13	49048.9		106.015		40249.8		428.885			250.111	1199.44	226.33	3408.06	152.184
P14151	479.455	280.748	692.943		1144.81	325.021	505.168	188.6	371.006	448.148	753.116	861.679	720.562	1139.6	499.825	505.121	414.927	526.11	359.766	779.014	1071.5	1316.37	155.463	483.835	1303.21	919.32	1128.4	1470.48		1029.84	745.65	765.232	1215.16	692.8	842.536	219.441	772.724	881.128	726.649
P01703	888.096	759.096	1461.87	349.575	1004.21	531.587	933.858	383.93	831.618	773.037	1578.57	552.533	651.541	1081.39	1421.39	2212.48	421.082	476.125	817.812	1384.06	315.561	1209.92		301.633	3569.47	312.815	1276.49	1270.1	8909.12	1567.36	1338.72	582.869	1199.61	674.602	371.716	522.825	1705.02	1596.12	1022.33
Q8NDA2				17245.5			30515.9				25220.3		29671.3				136.745		1801.61		21015.4		27601.6	521.139		22153	22764.9	683.136		16243.9	16193.5		28901.8		930.02	40.0447	18500.5
P01714	16218.9	25365.3	12687	13012.1	19209.6	25937.9	37599.9	20270.1	22811.3	13133.9	14414.8	22158.8	23893.6	19795.7	18868.5	20708.4	18208	21869.7	22683.4	9586.03	19384.7	24679.6	13899.4	34545.5	12162	7124.25	10100.1	22144.2	9763.83	19284.9	32862.5	8384.49	26455.6	18719.5	38587.6	9122.16	19918.7	38551.7	13528
A0A0C4DH31	388.848	108.37	390.197	2774.21	571.02	839.269	328.765	1650.92	766.654	1939.76	1821.91	6679.98	1202.44	1167.8		679.613	1918.17	2520.77	882.293	1559.12	727.954	9003.42	1284.84	8623.9	1354.92	977.779	555.549	278.974	891.461	2275.63	227.346	228.021	1200.71	812.189	970.064	2154.86	77.9079	1170.93	3613.53
A0A0B4J2D9	7180.49	4143.24	3748.3	3121.84	5207.19	3105.7	7039.32	3388.04	2208.77	2347.36	3279.85	6792.84	9114.22	6701.18	3845.4	3470.51	5173.38	2717.41	1850.86	2517.22	8640	8821.44	2849.97		157.594	2651.71	8636.06	9529.84	4281.44	5486.39	13041.8	9716.52	9002.33	5565.86	624.957	6051.04	333.324	8796.25	9423.34
A0A075B6I9	7341.83	17181.8	4613.52	5862.08	9768.08	12765.8	16892.5	7852.48	10485.5	7330.99	7394.52	6536.97	13869.9	5781.73	5411.23	7187.64	12799.3	3826.5	775.922	9720.76	7894.08	21141.1	10242.8	28021.9	8087.91	1338.52	15880.2	9712.23		32460.1	12029.6	15421	11695.3	9645.41	158.998	9735.93	19301.1	11963	8848.28
A0A0J9YXX1	3992.74	1820.43	2202.98	1359.76	2462.58	1682.21	2548.9		1944.86		2539.89	3069.85	4747.86	3453.44	1816.47	3091.74	2247.14	2329.67	1999.24	2359.81	2799.98	4611.77	1516.46	4174.27	7424.72	1284.6	3339.9	4247.71		3838.93	4268.76	1619.27	2636.38	2666.99	3259.87	1647.95	3299.24	1842.86	3558.15
A0A075B6K0	22312	20353.7	15231.7	20451.9	15744.5	30956.9	22829.5	23315.4	16730.9	18886.2	17637	24479.7	30914.1	19783.7	22772.3	32698.8	29218.8	26990.4	19365.4	9900.56	13695	20588	21582.8	43385.3	32552.1	9991.47	16094.2	28122.4	5886.45	18069.2	39744.3	20754.1	30799.8	16849.3	33612.3	30013.6	20766.5	35448	26297.4
A0A075B6K4	14775.6	15796.6	14320.6	14646	7340.15	24095.1	19729.1	19936.7	15564	13048.1	14684.5	19117.3	21710.6	14702.9	14904.1	26035.6	24702.1	18668.3	14541.7	8377.58	10442.2	13687.4	14402.9	37017.6	13536.9	6344.9	15627	22752.3	4299.11	13953.1	32708.7	13875.8	23228.5	9269.6	31055	25305.4	12445.7	27093	15213.1
P06331	3863.75	2487.87	2302.49	1036.96	7848.38	4296.06	1880.85	2485.57	4968.01	2780.49	1602.28	4450.35	537.702	1450.41	5440.27	42461.2	3675.07	1769.72	384.759	2048.1	4521.63	62938	4265.76	5666.7	54590.6	3248.47	5090.91	6092.61	2959.16	3210.24	9144.66	6851.98	2183.28	3824.93	3546.72	3282.41	1248.33	3725.44	5368.78
A0A075B6S6	50897.7	32112.3	30637.2	21143.7	55732.5	20702.5	46853.9	20202.7	23425	22992.2	35380.2	44492.9	55444.6	34453.5	31333.2	23260.4	18545.6	27455.3	18800.7	18764.6	45113.6	57746	30687.7	41060	57144.3	26214.7	53582.7	65040.4	14153.9	59761.8	61899.9	51222.8	60725.5	44505.5	66316.8	51604.5	798.724	45358.7	46571.9
P54108	273.294			58.6996	444.528				83.0946					102.413					86.8304		139.099	256.949		285.452	876.031		443.383	934.771		219.703	125.951	310.879	567.111	434.937	1011.63		754.374	218.329	203.319
A0A0C4DH73	722.13	395.277	642.175	239.061	934.555	56.1325	1199.2	225.847	422.702	225.856	545.411	872.276	680.781	316.712	245.867	52.2042	460.354	210.082		290.568	719.556	1028.87	230.686	487.361	678.609	194.073	703.991	909.787		869.952	644.009	493.263	485.111	378.677	713.997	344.621	527.693	624.05	942.851
A0A0C4DH25	8708.4	31476	26836	22861.5	34469.4	2835.75	21735	27345.8	24939.7	25978.5	9172.17	37202.7	56105.7	33918.6	30300	29103.4	22218	35512.3	18399.2	20708.5	44409.4	54529.2	37791.6	4612.11	58391	22250.3	51344.9	21875.9	627.779	43495.5	58408.4	56323.5	68670.1	27327.3	67730.7	34153.2	52721.6	59470.8	53862.6
A0A075B6I0	13222.1	13952	23332	3327.17	17183.4	17208.1	2650.78	13915	3429.67	9963.47	41599.4	10204.6	11751.7	19635.8	12459.7	17634.8	4391.62	3225.04	7912.4	7298.53	12381.4	27268.2	14041	5168.39	21778.5	9988.42	8337.6	13732.9		14431.6	18160.8	16632.3	17115.1	9694.57	4849.48	5361.15	2431.6	26426.7	513.684
Q12913	4915.95	1136.97	27870.9	1248.13			56186.7	30763						1719.52	4358.54	1466.65	2625.68	3319.22	832.964	3562.91	5261.73		29425.3	2497.79	1532.91		3211.35	8421.22	446.722	6340.23	5142.42	5441.02				1219.72
A0A075B6R9	12279.7	6938.76	7537.88	4867.37	13405.5	6942.69	11643.7	5067.42	5218.52	5939.34	8639.86	10411.6	5071.83	7241.05	7891.15	5996.99	3800.36	4505.48	5777	6472.16	10340	16923.8	6843.19	15060.4	9878.1	5090.36	11691.9	2857.63		17328.9	13334.1	11471.1	18193.2	2436.89	17573.2	6003.08	11935.9	16474.5	8880.12
Q13103			38.7281		186.016	63.481	323.615			41.3997	536.341	162.17	469.132			516.549		251.677	136.977	643.058	126.601	85.4361	67.2032	75.4186	148.326	182.348	104.884	59.4807		133.482			477.775	464.102	423.226		129.385	133.849
P01601	722.13	395.277	642.175	239.061	810.625	56.1325	747.438	225.847	422.702	225.856	382.116	742.825	385.731	316.712	245.867	52.2042	460.354	210.082		290.568	719.556	1028.87	230.686	2728.38	400.817	194.073	703.991	610.17		869.952	644.009	493.263	307.496	378.677	369.567	344.621	527.693	624.05	942.851
P01599	722.13	395.277	642.175	239.061	810.625	56.1325	747.438	225.847	422.702	225.856	382.116	742.825	385.731	316.712	245.867	52.2042	460.354	210.082		290.568	719.556	1028.87	230.686	2728.38	372.352	194.073	703.991	610.17		869.952	644.009	493.263	307.496	378.677	369.567	344.621	527.693	624.05	942.851
P0DP01	664.365	1538.79		873.511	161.945	241.104	470.367	618.467		874.504	1840.88	4929.45	95.3909			2305.83	952.75	1440.2	999.639	198.544	2143.51	1411.63		5883.98	326.867		998.089	3667.32	778.878	501.847	677.573	257.371	285.82	687.744	2840.62	3228.28	422.881	864.358	856.213
A0A0B4J1U7	2488.23	2258.39	3514.97	2590.23	10387.8	6953.53	5216.74	4475.97	2257.84	2693.92	2283.32	3847.22	13985.2	4666	3564.19	3180.07	1366.94	317.798	1558.48	5453.45	4825.94	4642.86	4726.7	9680.31	12339	988.53	4192.11	4001.33	470.539	2781.92	7269.08	6092.31	6384.16	11741.6	7437.82	5613.83	6603.79	15206.2	3371.67
O75015	205.391		89.2252	98.695	209.401	247.984	214.756		132.701	140.053	96.5899		201.791	341.458		167.099			107.55	298.769	118.656		192.919	151.689	268.266	226.32		227.495			64.7413				372.071	98.4313	189.683	404.115	445.692
A0A0C4DH68	12279.7	6938.76	7537.88	4867.37	13405.5	6942.69	11643.7	5067.42	5218.52	5939.34	8639.86	10411.6	5071.83	7241.05	7891.15	5996.99	3800.36	4505.48	5777	6472.16	10340	16923.8	6843.19	15060.4	9878.1	5090.36	11691.9	2857.63		17328.9	13334.1	11471.1	18193.2	2436.89	17573.2	6003.08	11935.9	16043.3	8880.12
P41222	743.002	182.421	410.034	99.877	153.059		489.097	220.841	244.258		1478.79		524.473				144.014	313.659	255.347				2762.62	95.6688	1567.79	395.448		285.949		130.577	271.151	56.7222
Q16787		452.653	338.889		1247.72			57.2367				256.603	847.952	1329.86			176.795				1033.36		206.082		2463.11	329.69	1024.43	920.46		845.522	97.9456	478.833	1482.04	350.787	1255.05	465.109	367.95	95.0603	1165.15
P08637	205.391		89.2252	98.695	547.26	247.984	214.756		132.701	140.053	96.5899		201.791	341.458		167.099			107.55	298.769	270.99		192.919	151.689	268.266	175.384	185.907	227.495			64.7413				372.071	98.4313	189.683	522.337	580.936
A2NJV5	59942.6	37402.9	36814.4	25348.6	66439.4	26645.6	54947.1	24266.2	28024.5	28300.2	42440.3	51343.8	56725.3	40637.7	38260.4	29257.4	20834.2	31191.1	23941.4	23971.7	52113.3	72239.9	37530.9	50917.1	64718.7	30364.4	62057.3	65203.1	403.594	73673.4	69581.7	57840.3	71259.4	44505.5	77190.3	56095.5	8103.24	55070.7	52607
P01742	815.52	1762.75	342.817	1134.46	1122.62	241.104	1133.74	618.467	120.637	1399.24	1592.07	5564.37	474.178	321.887		225.87	1480.77	279.755	1087.49		2092.94	786.149		6050.3	497.411	109.739	2500.27	5563.83	778.878	728.273	415.022	1777.37	840.419	897.44	3583.45	5124.17	481.456	2423.8	1049.48
P61769	3298.42	3028.16	3181.59	1586.61	5051.71	3887.69	8440.7	2236.08	3929.79	2544.93	5775.18	3236.21	4431.81	2719.5	3014.28	3464.29	1846.29	3480.89	3688.93	3977.35	815.535	7323.08	3287.63	2032.5	5492.45	2862.21	3360.46	3146.72		2168.12	4104.61	1643.87	4714.95	2185.66	4165.1	2858.93	2673.94	1180.91	818.367
A0A075B6H7		2327.84			4561.02	1987.13	10428.5	1260.32		1728.32	3116.41			1914.57				5577.72			3150.59	2423.12	2841.92		5029.72	1674.24					4167.24		12996.9	4220.41	59.8044			217.102	3115.81
Q8WUJ3			678.999	391.719	2162.31	1054.74	2156.11	306.006				1394.16					1039.27				1874.33			1654.31	4656.53		267.357	1367.65			1390.58	1719.19	1336.52			4548.58			697.717
P02452		356.916	242.179		284.388	321.33	357.472	443.319			649.922		204.236	99.0041		144.161		124.951	228.049		276.06	215.475	280.769		431.187					385.879			237.819	358.57	139.856	905.048	439.782	248.883
P00325	1108.36		520.923				678.097				164.618	306.282				394.401			86.4046		234.559	787.551					584.188	1009.25		86.1999	583.036	296.303	196.83		454.896	124.825	382.929	539.883	280.175
Q6YHK3	207.915	59.6462			387.805		275.62		342.444		268.176	582.806	345.083	286.836	442.279	356.952			371.42		215.46		200.399				323.718	261.362		295.618	126.819	367.539	648.435	47.6265		54306.1			165.067
P01593	1533.36	1205.82	918.293		2122.91		689.421			113.721				1519.76			877.177			1345.88	2422.69	2535.61	622.503	2404.26	3472.56	1635.7		4465.52		1639.69			2011.26		4220.94	1412.24	1796.28		1555.29
P59666	739.305		70.212		3570.04		656.83						223.429								640.625	5730.65		259.418	529.307		509.942	1107.79		265.548		163.907	265.971	254.526	491.947		584.617	2444.65	1192.16
A0A0A0MT36	125.077	95.8599			104.276	129.823		222.553				250.142		410.991	355.776	327.703			263.962		83.0271	819.393		435.733	555.538			1849.48		448.039				393.812	53.8602	225.947	367.381	188.133
A0A087WSY6	810.19	646.747	1138.7	689.797	1269.66	469.196	1568.24	438.601	468.302	171.311		758.527	500.729	379.944	405.228	322.889		298.868			1225.34	1540.65	265.473	983.317	827.75	212.979	1578.56	403.035		830.652	1487.76	1722.08	2758.92	840.74	1978.25	1033.66	942.343	1142.34	717.77
A0A075B6S5	978.853	1454.06	751.443	73.2673	724.516		2670.09	94.3103	442.107		2406.47	1165.48	1898.42	1226.39	271.227	251.621	735.521	216.988		281.154	1672.21	1496.17	883.719	2603.97	2300.74	326.214	1247.21	1899.06		412.691	604.262	113.172	2222.9		2207.64	313.159	476.611		1058.17
P02788	65757.6	48932.1	82004.8		57826.3	47522.4	61782.1	55941.5	67388.3	60211.2	47221	56894.9	45205.2	56253.4	68997.1	41769.3	37549.6	42340.1	62447.6	77267.2	73703.1	45040.4	28198.6	55575	69257.7	33301	28145.1	67079.2	4819.93		55832.2	81372.6	64688.9	84798.3	76299.5		81653.8	243.774	85488.7
Q9Y5Y7		319.551					125.982	100.311	64.8318	110.36	1083.42	139.669	471.603	497.364		192.1	97.3332	257.07	292.703	582.062			397.203		380.276	306.994		629.556		670.488	878.689	424.372	745.344		370.211	60.4109	277.011	402.988
A0A0C4DH67	978.853	1454.06	751.443	73.2673	724.516		2997.02	94.3103	442.107		2406.47	1165.48	1898.42	1226.39	271.227	251.621	735.521	216.988		281.154	1966.76	1496.17	883.719	199.704	2300.74	326.214	1247.21	1899.06		412.691	1025.12	113.172	2222.9		2207.64	313.159	476.611		1058.17
A0A087WW87	51216.9	32112.3	30637.2	21143.7	55748.7	20702.5	46853.9	20202.7	23425	22992.2	35380.2	44492.9	55444.6	34453.5	31333.2	23260.4	18545.6	27455.3	18800.7	18764.6	45113.6	57746	30687.7	41060	57177.3	26214.7	53582.7	65040.4	24392.1	59761.8	61899.9	51222.8	60725.5	44505.5	66316.8	51604.5	798.724	45305.6	46571.9
A0A0C4DH29	721.466	1278.02	376.042	873.511	161.945	241.104	470.367	618.467		874.504	2378.5	5215.66	996.209	1069.17	366.496	348.432	952.75	473.75	999.639	672.982	1922.38	650.12	466.66	5396.56	926.75	103.301	1643.28	4698.06	778.878	1613.55	1014.08	963.781	466.88	968.492	2974.12	3228.28	251.281	864.358	1050.86
P01706	166.118	1030.82	199.551	370.772	100.952		161.001		1727.09		14494.4		290.846	18161.6	19286			410.55		275.501	2584.26	3048.22	102.334	516.335	200.897	163.287	2986.68	26099	8909.12	4780.09	450.291	12736.1	96.8183	729.317			341.074		19542.2
Q6UXB8	129.043		63.7504				82.4037		55.8171		899.138	126.209	128.866	411.006		244.446	201.183	63.5706	256.933	109.063		282.31	67.1019	138.371	267.122	291.774	119.65	92.4251		268.542	128.155		378.343	64.2181	152.786	448.038	358.644
P04430		350.13	52.7761	169.92	1311.67	82.2399	208.575	79.0077			220.015		217.065	84.2575		92.4048	151.618	173.466			81.9699	511.06	260.316	2756.16	239.701		590.604	806.24		263.421	447.642		325.147	189.125	340.442	195.977	264.483		237.014
P01718	23731	19627.7	14149.8	19758.2	15611.8	30306.6	22930.3	22838.6	15871.4	18171.5	17081.7	25273.5	32286.5	19117.2	22166.9	30977.7	28295.8	26243.7	18516.8	9369.3	13235.7	21030.8	21214.8	43385.3	33628.7	9641.86	14993	25297.1	5736.54	17684.5	39353	20626.5	29348.9	17828.3	32137.9	29238.6	20402.6	35531.4	25409.1
P04211	7624.95	17639.7	4757.79	5862.08	10240.3	13088.5	17193.2	7852.48	10485.5	7475.8	7943.12	6536.97	13626.4	6003.85	5568.74	7447.87	13073	3826.5		9912.58	8208.58	21256.5	9724.59	4649.79	7983.3	1338.52	16434.1	10219.9		9522.38	11155.1	15976.6	11189.5	9752.67	158.998	9841.38	18953	12246.6	8848.28
P16070	1482.05	232.4	717.1	442.636	1383.4	185.531	1075.09	567.182		352.77	1342.6	904.693	1087.3	624.126	707.659	411.315	508.273	438.863	214.251	1079.37	1094.43	1083.46	613.601	1146.95	1401.89	415.198	1051.1	1435.3		831.471	245.767	155.154	803.902	959.744	1650.42	802.416	1141.26	241.94	702.63
Q7Z6Z7		1534.08	1919.87	1224.32			1690.51		1320.75		1088.42	634.029	2026.26	1048.52	1223.95	2019.89	1921.8	1572.65	1167.14	1245.94	959.376		1489.3		948.206	1639.11	1044.87	1041.81		517.36		991.731	3043.43	878.89		1127.61	1127.07		1118.35
A0A075B6R2	1228.62	569.831	486.187	1213.66	557.902		849.987		463.699		1440.31	1023.5	1802.72	1960.06	159.348	1151.03	762.125	584.863		154.411	1347.59	1839.53	1095.69		3323.86		1347.25	2551.76	881.38	2558.79	1967.78	1111.95	1143.82	605.331	1707.11		523.52	2426.58	1715.9
P23083				2609.35	692.295	839.269	328.765	1489.58	766.654	2011.28	1352.52	7015.97	1478.5	1129.83		578.392	1470.2	2147.68	882.293	899.412	519.892	8830.75	891.711	8281.74	306.685	877.308	342.69	106.65	891.461	1934.72	364.369	228.021	1082.38	812.189	74.0508	2154.86		1170.93	3613.53
P30153	2178.34	975.651	745.114	939.349	907.587		2514.29	767.013	654.817		1586.56	918.951	2333.25	581.167	809.133	167.388		1059.7		949.062	1895.33	801.914	1543.86	398.439	1162.94	194.24	1452.46	1563.27		2565.62	778.014	855.73	1805.21		3393.2	947.838	838.641		456.749
Q15848	331.163	196.919			287.069			175.764	124.287	149.119	221.346	223.382	428.894	946.004		257.932	326.115	166.144	186.442	284.448		733.363	90.6493	201.572	189.647	626.524	303.515	102.779		612.676	871.425	68.4432	520.378	259.708	553.768	495.72	96.0511	360.298
A0A075B6H9	2280.07	1228.31	361.308		1714.31	1123.78	1271.31	1165.8	406.132		210.553	1565.68		1024.49		3495.73	1537.02	1113.78	1069.29	1133.79	1670.96	2677.02		213.965	1368.33	709.428	959.588	1143.89	8892.28	1661.64		1524.55		1795.58		681.647	1095.55	2634.92	178.376
A0A0A0MRZ8	4148.95	3979.68	541.608	434.089	741.338	105.732	1378.82	781.907	282.809		1066.93	6882.93	1598.12	1510.83	343.903	1722.2		1636.66		669.91	2100.26	963.527	253.048				1338.17	5867.03		1955.24	2866.03	1392.6	1277.31		903.422	2928.85	17192.4	2639.24	1316.01
Q9Y2K3	19410.9	178.94	21305.3	17889.1	18580.8	11019.8	27621.6	7058.44	20303.3	9960.37	16113.2	14885.1	17187.8		12250.8	17999.3	11592.9	15776.4	16231.8	13300.8	17917.9	19464.7	22657.5	1158.76	18640.1		13223.3	20479.9	1728.12	15788.5	19908.2	17175.2	23206.5	19479.5	14539.2	19045.4	14286.3	15898	16066.6
A0A087WSZ0	978.853	1454.06	751.443	73.2673	724.516		2670.09	94.3103	442.107		2406.47	1165.48	1898.42	1226.39	271.227	251.621	735.521	216.988		281.154	1672.21	1496.17	883.719	199.704	2300.74	326.214	1247.21	1899.06		412.691	604.262	113.172	2222.9		2207.64	313.159	476.611		1058.17
P07942			61785.8		98.5079		907.316					9561.97									172.658		307.586					9161.13	22156.4	401.613			328.743	9865.98		355.132	8211.05	2347.86
P15559	6229.04	8602.67	8380.09	6364.61	3743.57	2870.92	9481.23	4090.59		3113.65			11491.5		1655.97	6212.53		5288.72	4041.49	118.986					9628.88	74.2492		6804.42		6899.37	7925.46	5161.65	83.7418		12938.5	5472.33	8601.65	416.156	62.3987
Q86SQ4	2043.27						3470.76	575.461	383.065	817.044		982.911			1226.52	362.756	1359.51				6817.33	3145.6			1866.23	1068.06		3366.56		1345.73		861.524		1025.5			1673.87	961.373	4912.41
P0DP08	3863.75	2487.87	2302.49	1036.96	7848.38	4159.17	1659.84	2485.57	4968.01	2780.49	1602.28	4450.35	428.929	1450.41	5440.27	42461.2	3675.07	1769.72	384.759	2048.1	4359.92	62938	4265.76	5666.7	53515.7	3248.47	5090.91	6092.61	2959.16	3053.34	9144.66	6851.98	2183.28	3824.93	3546.72	3282.41	1248.33	3725.44	5109.14
A0A075B6S4	722.13	395.277	642.175	239.061	810.625	56.1325	747.438	225.847	422.702	225.856	382.116	742.825	385.731	316.712	245.867	52.2042	460.354	210.082		290.568	719.556	1028.87	230.686	324.119	372.352	669.305	703.991	610.17		869.952	644.009	493.263	307.496	378.677	369.567	344.621	527.693	624.05	942.851
P35580									3730.09				287.452			388.27	203.723				518.295	247.273	548.861	528.136	1849.58		472.124	265.482			591.952	420.718	337.942				218.954		401.553
Q12931			2460.75			1681	4379.9	222.527	1801.64		2475.86	2131.91			2259.85			3048.62			2606.07		3472.18	4077.62	2486.92		4571.7	3697.31		2302.38	3091.78	1988.4	4404.29	1090.5	3013.74	2526.77	1390.95		89.5235
P37837			6715.9	15523.7	65569.8		21517.7	36491			51736.5	20201.9			27215.2	21326.8	87303.2		773.298	38495.2		65945.2	7071.59		28391.3		32440.3	20636.6		59577.2			59950.7	32928.8		11374.9	27224	10581
Q9NR45	5924.69			4059.75	151235	8894.24	36541.3	9741.81		4260.68	31403.1	94866.4	11155.6	3714.42	82240.9	2694.69	42021	20440.4	1348.72				12676.3	303.839	5994.61	983.086		4297.21		4583.92	171013	2174.9	207471	115968		48834.5	117591		27643.8
P49756			103.218				516.596				71.8423	140.568		103.366	242.028		110.912		140.592		518.556	560.024			1146.41			960.189		152.647		981.723	1252.16	302.382	127.788			995.122
Q12884	494.209	997.19	928.628		494.001	1371.74			1314.51	523.991	1207.25	658.989		1447.59	768.165	706.719	927.052	1235.8	895.342			719.129		629.059	1116.57	1179.79	843.788	904.675		830.866		696.414		801.145		890.166	796.699	1218.47	398.421
P13667					230.609		238.319					276.678									217.591			889.181			273.691			172.776	350.14		525.754		742.358	454.991		641.104	263.485
P05107	582.285		377.94	661.948	364.193	189.48	2176.13		262.876				805.841	296.439			206.882	707.817			701.828				229.573			1254.49		513.193			1333.96	145.365				1282.25	1111.85
A0A0J9YVY3	981.892	579.958	3832.63		685.653	86.4735	1170.56	5520.9				8195.24	1410.73	3821.92	7482.11	7733.01	3767.25	3084.31	3386.48		2412.4	719.472		17095.4	698.048		1069.27	580.45	4033.59	1703.26	29626.7	1961.82	1450.3	592.118	1582.3	1281.95	19788.4	1560.5	1456.22
Q8NBS9		17867.9	26271.7		21645.8	51383.9	35870.5		35051.6	949.674	30002.9	19446.6	63323.4	67948.6	93195.5	62766.1	60941.2	86757.1		132237	53843.3	74715.5		16201.8		21661.2	84577.1			77528.9	38111.8		56217.8		109317	7479.73		73103.6
P80188	881.26	2752.46		882.548			48.0598			12009.3	11571			3524.58					4438.24	3143.74		22633.7		27640.3	4501.07		7937.66	6510.25		20176.8	44042.9	7706.73	417.86		4319.85	8361.83	25058.5	3584.98	8575.37
P01344	1454.34	1575.61	1078.82	1766.54	1115.79	413.405	2322.8	1096.55	1574.47	959.541	1356.97	914.366	1659.24	1449.25	1557.2	1269.07	769.703	1584.79	1546.55	1424.41	1346.1	1934.41	1033.08	1206.69	1400.62	1024.82	2412.77	1852.28		1800.75	801.4	1076.98	2597.15	1790.67	2371.96	1213.13	1004.74	1030.92	2726.59
Q5T013	11130.4	18777.6	5365.89	1691	17454.5	15022.2	6277.25	11562.3	12177.4	20316.2	8472	11916.7	9024.46	10326.9	17932.6	6744.02	13978.3	19493.6	17570.2	16578.7	12337.5	13908.7	9076.11	16768.1	9871.53	5932.02	16157.3	12621.6	399.77	11521.8	3653.35	7738.44	12048.1	10812.6	11039.2	8923.93	10842.7	6463.97	14901.9
A0A087WSY4	79.05				356.015		1199.31	252.722		733.446		52.4976	197.149				38.5464			415.693	465.757	1204.38			145.504		588.559	2231.03	881.38	588.248	219.547	1350.94	111.363		35.5991		290.581	2369.22	886.986
Q01973	1660.3	938.76	2057.61	16445.6	19679.1	205.336	19212.7	13480.7	757.8	508.276	12306.5	13111	1129.08	638.069	14035.1	547.718	14988.5	10454	757.666	10989.8	598.385	356.518	1155.23	12149	2220.51	1674.45	18247.7	1995.31		19677.6	21624.2	869.292	11628.9	1237.74	1453.32	20764	2250.69	634.538	1847.17
Q92734	1851.41				907.85		4659.75	244.457				1407.16	129.142								372.072			1147.47	4409.69	82.0518	2695.37	1155.17		977.191	2773.4	1653.31	5069.12	253.95	3736.65	471.821	3822.75	3373.58	2437.34
Q8TDN6		915.861	1552.72		2853.08	3082.12	1348.76	2870.58	1297.1	2431.52	2051.11	1920.82	2704.22	3020.65	2958.06	921.121		950.275	1520.75	2652.67		2404.82	646.526		3583.86	1537.93	2936.4	2270.56		2316.31	1843.98	2212.57		2704.32	3428.97	2649.89	3361.51		2158.73
P01743	124.105	1768.34		873.511	237.727	241.104	690.462	618.467		874.504	2327.02	5255.2	726.666				952.75	772.524	999.639	174.207	2015.47	539.65	417.186	5396.56	1396.05		998.089	3749.16	778.878	501.847	415.022	257.371	388.168	687.744	2182.23	3228.28	42.3961	864.358	674.151
Q92791	40742.4	10034.3	22047.3	26687.6	67181.4	19235	10813.4		1659.16	3213.22	9836.06	35755.4	41154.2	5100.47	13124.6	2198.47	3996.17	9550.77	14949.5	2899.86	15248.4	20147.2	2603.66	45670.2	7462.31	5601.53		35560.3		2343.67	40906.8			9497.35	31075.6	26475.1			23706.9
Q96T58	20376.1	3865.49	8260.18	9308.97	2754.48	10754	15056.3	3764.9		1655.03	4118.59	14728.6	16893.4	1761.22	5226.18	947.022	1893.42	4509.88	486.028		6270.8	8980.54	4294.06	23876.1	6400.85	3319.88	20251.6	19256.2		1804.43	2349.06	11857.2	24842.5		26695.8	14968.4	9696.53	12824.2	13406
A0A0C4DH43	2681.75	1374.33	1310.34	4451.01	5458.91	4457.33	309.741		2620.35			2582.91	2160.28	2112.07		1189.47	5020.38		2400.83		2304.76	2664.5	2607.83			2558.71	3420.26	8980.86		2637.92			3246.24	1483.7	2756.57	2698.34			2305.37
Q15661	1925.9	1878.8	1496.14	2532.35	2019.68	33170.8	2267.87	37849.6	40690.3	1224.52	44655.1	1564.74	40767.5	33801.9	2462.88	3877.06	1895.43	2175.33	29621.1	1777.33	775.572	1901.72	1885.88	5027.61	1937.56	40728.2	38259.7	30542.5	651.366	2519.35	22601.1	27736.5	2663.13	43177.6	2640.86	1002.53	2537.75	2102.31	3416.12
A0A0C4DH34	1404.13	1072.5	388.17	453.401	2907.1	796.605		300.121	296.19	662.496	550.472	419.307	942.328	873.418	1132.58	251.06	341.355	300.276	190.701	324.782	1622.6	1102.39		628.202	2803.13		892.121	1198.09	241.96	866.019	590.894	702.409	1203.74	180.634	1460.06	418.543	662.834	773.35	753.222
Q8WYB5	1103.26				1709.31		157.923	516.936	547.787			1103.99	896.16	1645.66		2251.76		1065.46	2068.76	2021.15	487.933	1737.45		1420.62	2517.42		1590.6	692.798		976.108	2018.82	2552.93	2406.12	1259.12			1042.28		490.77
Q9Y6D5	1425.15		826.17		975.589	1247.79			1253.7	883.475	2334.54		989.141			1898.53	574.322	684.314		361.717	698.435	80.7256	1130.75							1470.72	2120.81	1729.21	902.031	559.622	1332.27	898.916	348.408
P16109			26792.2	515.488	32288.5		603.389	3672.27				369.803	581.167		154.166	41371.4	27795.5	32043.2		31903.8	40453.4		36807.5	637.926	3629.35	30347.5	573.61			35328.2	39254.5		38844.9	396.749		41044.5		241.202	526.226
Q7Z7B0	1838.31	1608.7	1377.84		1555.98	2271.78	3868.62	1296.18	2670.33	936.733	2325.57	2197.96	2555.56	1425.32	1239.86	2570.71	1991.61	1211.92	1629.21	920.443	2141.67	2151.89	2769.92	2496.9	1851.14	2848.22	2677.81	2968.66		2223.26		2979.14	3543	2199.62	1481.32	5688.39	3675.95	2400.05	1819.56
O15050	41675.9	17449.4	14300.1	15110.3	66310.8	21625	41833.2	11920.4	12028.4	30750.2			17379.7	39114.7	36241.8	16907.9	17898.1	1064.87	9453.03	16929.6	108775	29277.7		7438.61	69993.6	55733	26569.4	1822.21		99541.8	52830.2	32199.5	47075.8	33166.4	40816.1	34788.5	39386.2	10974	62036.5
Q8NFC6	1236.36				1934.79																1651.19	1394.92			1899.55		1835.83	2495.65		1119.13			3374.57		1678.47		1503.11	1603.28
P08582	65757.6	48932.1	82004.8		57715.8	47522.4	61782.1	55941.5	67388.3	60211.2	47221	56894.9	45205.2	56253.4	68997.1	41769.3	37549.6	42340.1	62447.6	77267.2	73703.1	45040.4	28198.6	55575	69257.7	33301	28145.1	66921.7	19535		55832.2	81372.6	64688.9	84798.3	76299.5		81653.8	243.774	85488.7
Q9Y6X6	52703.5	71973.1	83037.9		77524.5	69184.6	51503.9	58818.4			81235.5		76733.6	60255.4	72511.9			76604.8	61851.2		54421.8	42131.3	75123.5	58823.9	62178.6	361.158		63658.7		58913.5	41572.8	50423.7		59928.6	77360.9		53823.3	30648.5
P12036				577.992		1103.58							899.745		1084.86		449.124			6774.64		3230.21	706.395			386.826	528.415				149.599		490.257	448.986	648.806	202.909		257.274
Q7L7X3	1380.38	3746.88	3085.14	3051.15		370.775		984.398	1678.33			831.336	2465.42	1904.93	2455.59		1415.75	2648.24	1628.36							1521.02	1869.01	2792.99
A2RRP1		24949.7	21277.6		23069.4	19690.7	21357.8	22389.7	24168.3	13839.1	24842.8	24609.5		22475.2		14456.9			11230		23390.5	23599.1						20370.8			14629					16587.5	23896.1
P38606	540.992	365.834	148.335		559.455	631.134	1181.11	356.85	705.881	601.065	879.539	702.119	628.849	709.887	633.261	575.755	414.139	503.644	427.193	1206.98	485.754	1379.06	279.827	923.024	1292.51		892.977	1361.63		750.293	1007.1	1782.48		744.773		485.411		512.433	1503.66
Q8WZ75		311.653	389.832		7899.8		24838.7	19222.4			39132.4	13433.3			253.358	1110	28166.1				178.132	5847.55	440.664		16120.8	48777.5		14244.5		13247.8	17867.8		17675	10092	18584.6	9539.52	15517
Q8IU80	1925.9	1878.8	1496.14	2532.35	2019.68	1275.36	2267.87	1445.27	1305.6	1224.52	1669.79	1564.74	1502.4	1386.07	2155.6	2005.13	1895.43	1762.9	1999.72	1777.33	775.572	1901.72	1885.88	2057.33	1937.56	1309.47	2766.79	2679.03	651.366	2519.35	1235.55	1684.77	2663.13	3251.4	2640.86	1225.27	2537.75	2102.31	3416.12
O75175	3728.8	16305.6	868.616	18641.2	4812.57	9639.97	3981.07	45348.3	13082.8	4405.5	18002.4	24201.9	2392.66	13565.5	14050.8	293.255	23565	10611	15403.5	17134.5	25358.2	26896.8	2283.3	8055.14	21770.9	21683.2	36594.6	11258.2		20305.7	1351.78	1485.54	287.878	1022.89	4646.43	5427.08	28968.1	712.582	37076.3
Q75VX8	1659.43		399.394	1076.06			3484.42			545.071	584.827	1114.81	1348.38	481.833	356.331	967.866						2734.56	905.38	2031.96	3234.52	389.55		4457.61		954.86	1506.76			852.521	1694.7		717.712
Q9Y2Q0	28932	16899.6	6040.95	115857	25377.2	117351	16707.3	115652	26814	112806	70433.5	13930.9	15260.6	141213	127536	151542	3353.49	10414.4	21149.3	97943.3	6705	12014	22970.6	31744.4	111108	150222	77719.4	15186.9	612.743	116628	28718.7	112780	116877	200.008	24974.1	117578	20608.3	16456.4	16152.2
A0A0B4J1U3	523.613	593.506	294.816		681.412			484.152	287.122		760.812	550.649			552.882		803.049	597.519			412.193	644.83	430.593		291.999		496.293			453.952			945.276						297.741
P01817	2585.24	857.941	710.505		1468.65	1310.56	456.604	1195.72		717.503	2637.67	1200.91	1583.27			1400.55		2156.11		453.828	1844.68	2737	1018.62		1584.29	298.442	2016.03	3919.4	213.504	1989.63	3786.37	2641.62	2355.27	931.549	3544.14	1118.42	2201.92	4613.93	3516.85
P78385	3247.88	2400.1	6513.39	2420.17	2469.78	2317.33		2147.86	3299.7	1945.92	2059.28		2310.97	2878.44	7682.91		2359.18	2097.48	3031.43	6619.38	3393.77	2887.37	9286.15	2280.05	6561.55	3472.57	6436.12	3343.52		3282.73	4314.6	3777.89	7781.66	3515.73	2546.26	3343.92	3891.25	3852.18	3608.8

## Sheet: Spectronaut-serum EV
Protein.Group	AC1	AC2	AC3	AC4	AC5	AC6	AC7	AC8	AC9	AC10	AC11	AC12	AC13	AC14	AC15	AC16	AC17	AC18	AC19	AC20	AD1	AD2	AD3	AD4	AD5	AD6	AD7	AD8	AD9	AD10	AD11	AD12	AD13	AD14	AD15	AD16	AD17	AD18	AD19
A0A075B6H9	8866.33	6007.94	7890.07	5653.45	5336.45	4273.62	6171.61	6017.45	5499.95	7077.46	5290.15	8471.79	5926.99	1968.69	6491.4	9403.57	7061.72	6648.71	3289.32	8271.26	3346.52	7886.9	5757.17	6329.28	8151.24	2728.23	2905.68	3165.29	6066.14	8506.56	10555.4	4558.25	5202.22	11265.1	9586.29	5784.19	6391.9	9373.21	6883.74
A0A075B6I0	1070.72	558.988	5039.41	182.358	1113.13	824.659	147.491	975.221	219.795	645.618	817.858	946.022	582.217	415.018	707.483	1457.45	207.152	138.541	758.289	701.518	604.361	1747.04	145.133	187.076	718.83	1284.52	148.582	876.186	100.671	708.218	572.971	333.448	311.551	571.823	530.955		255.696	1911.32
A0A075B6I1	1247.86	911.563	880.823	367.711	2242.39	583.815	445.056	1145.54	863.095	2596.17	898.252	1965.79	1216.74	542.614	1040.18	1436.46	1354.12	334.171	831.261	993.972	82.1358	257.686	302.421	193.664	2255.52	489.944	1115.27	759.088	407.7	108.533	4078.7	118.235	912.782	202.397	1177.81	1489.88	89.7778	314.057	169.001
A0A075B6I4	3143.05	1204.04	1435.81	500.943	716.525	2663.31	864.514		1190.1		754.293	1989.22	2249.73	1325.8	1818.49	545.948	1790.05	1190.44	64.8696	2387.03		1111.24	308.237	347.555	1693.44	5462.03	1057.99	1404.42	917.791	1720.33	62.5227	1142.8	81.7586	1356.87	1368.64	1502.11	72.3393	2295.5	909.608
A0A075B6I7	449.095	334.372	969.596	547.813	497.53	347.659	555.341	923.653	524.901	1395.62	708.923	976.873	211.579	264.86	483.777	605.608	908.012	217.037	500.301	800.549	326.482	960.851	176.802	104.327	721.573	334.404	367.647	744.449	401.479	630.562	1084.23	492.821	644.817	217.576	4383.48	346.071	450.233	627.685	353.644
A0A075B6I9	2544.15	1943.73	3091.72	2954.92	1936.14	1972.63	1956.06	2579.68	4619.25	1496.03	2758.89	3049.47	3549.71	2125.41	2169	2532.64	3625.78	1476.98	3206.82	5806.56	2060.58	4028.95	1370.36	1772.48	3741.42	1615.05	1984.55	4681.66	1588.79	1920.09	2169.12	2015.15	2269.04	2676.2	5420.78	2726.62	2547.5	7790.74	1867.88
A0A075B6J1	24.7925		123.38			23.8175		50.1823	52.2348		20.0924		21.6605	107.023	19.0542	59.6735	83.0749		54.5478	46.576	20.567	109.823		16.0837			56.9277			24.8831	683.759	39.4053		74.0837	94.8453		126.335	202.234	57.8032
A0A075B6J9	2250.49	1303.28	2172.67	1477.37	2184.17	1658.22	1035.01	2519.74	1169.59	1239.05	491.355	1972.42	1157.88	386.1	1340.25	2472.94	4052.03	1300.99	1536.54	1357.92	2074.74	852.875	1239.28	667.939	1361.73	1009.69	492.485	356.389	821.903	786.737	5108.27	431.515	462.274	1194.51	769.447	776.76	1847.6	2487.2	1347.97
A0A075B6K0	476.806	319.912	495.903	249.647	86.7553	307.179	209.967	93.4932		359.735		110.912	231.818	109.372	423.665	785.618	143.144	149.305	25.8983	388.145	23.8184	165.708	262.78	95.6909	175.171	86.209	56.2314	292.775	131.768	136.954	143.024	83.9406	260.563	326.395			165.822	422.394	136.013
A0A075B6K4	2221.38	3927.89	6857.58	3045.38	901.234	2102.37	2189.59	3696.07	6597.41	3031.54	1175.8	527.502	2787.67	1462.28	2655.5	7367.64	2500.73	1623.89	6943.77	2463.5	2604.44	1735.07	2231.69	1450.18	1330.75	1465.99	1356.92	3743.01	1804.91	2717.75	5551.35	979.407	2776.25	2500.19	1810.76	2941.44	1384.21	3105.39	1283.56
A0A075B6K5	1958.19	1423.47	1298.01	1805.36	1842.18	1802.81	1708.52	2850.96	2366.73	1992	1059.21	2763.56	1128.86	1519.09	2360.44	3690	2851.71	1634.16	783.46	2871.07	4833.57	2628.09	1112.59	1294.8	1099.34	1333.76	783.395	1991.21	2182.62	2355.88	4030.34	1657.89	2379.1	700.861	1960.4	2803.78	1174.23	2043.87	575.011
A0A075B6P5	1450.47	2342.74	1419.63	1463	1384.56	1547.24	1415.57	2166.72	2788.48	1077.24	1292.6	3934.19	2372.13	1483.99	2069.23	1186.5	2785.21	1855.56	1702.37	4373.31	1472.02	2775.6	967.289	1278.43	1059.22	2974.85	1509.06	2600.01	1448.4	1926.39	1833.94	2024.87	1778.14	1310.58	4078.86	835.721	4103.46	4082.74	1724.59
A0A075B6Q5	2720.97	733.531	3228.23	1628.54	1090.33	1008.1	663.979	4048.13	1585.7	2105.35	699.197	1942.55	608.657	689.3	1431.13	2044.22	1227.66	1201.06	1250.44	1567.8	4855.71	1485.8	699.214	566.212	1521.53	864.431	400.327	1455.1	742.414	1009.61	721.248	581.189	949.105	814.248	1835.08	402.01	739.422	5178.54	873.499
A0A075B6S2	22759.3	15524.2	16882.6	12416.2	11321.4	13540.1	10936.3	14120.3	20139.1	10882.7	10863.7	29049.6	14930.7	11903.2	17583.4	20086.1	2373.19	10285.8	13818.8	23282.6	3025.08	33946.9	8996.68	9995.03	13614	12626	7210.11	15889.3	14811.7	15534.6	9170.2	8050.54	9971.3	9212.93	24739.8	7344.29	12440.2	15685	12879.1
A0A075B6S5	766.497	569.278	405.125	492.014	422.2	430.908	176.465	636.501	412.051	434.971	328.595	776.565	411.325	379.747	547.379	761.745	455.942	244.645	742.762	561.898	543.335	800.625	361.586	626.42	451.54	476.148	320.207	730.104	424.051	432.378	458.129	384.177	477.29	370.785	498.162	380.185	328.851	538.849	361.564
A0A087WSX0	4215.49	2268.35	4225.44	3284.72	2380.76	2825.25	1222.99	3241.59	2691.91	6377.05	3060.68	3485.55	2817.06	1303.27	3428.57	2395.2	4968.88	1300.94	2028.2	12905.7	2982.66	5909.84	1038.31	1066.72	2870.71	1845.16	1368.52	2360.15	1312.33	2161.33	4405.06	2054.15	4202.84	1694.35	9729.3	1197.19	2029.08	2032.96	5608.43
A0A0A0MRZ8	5558.84	5961.5	6097	4785.24	4186.39	5553.54	5034.18	6029.69	4211.42	3054.72	4012.06	7523.82	8629.69	2813.84	7574.07	2944.16	5056.1	4710.96	5877.88	7194.85	3847.29	8090.8	4004.81	3272.89	7418.84	6281.88	4027.36	2784.22	5566	4531.9	5021.22	3393.77	5754.89	4922.79	7343.16	4744.09	4313.86	10523.9	4508.87
A0A0A0MRZ9	110.978	48.4792	111.004	52.486	57.9992		40.5776	19.7267		52.1962	29.8159	77.5765	27.4458	47.9987		66.5124	63.8358	44.3834	263.993	57.8291	55.8551		26.6273	23.1398	74.615		38.2254	32.3359	25.3053	24.9852	63.0105	18.5062	22.3472	47.2588	52.6413	29.6569	26.1933	63.9395	25.6379
A0A0A0MS15	607.785	284.261	934.55	926.541	1375.06	888.177	361.178	1114.47	639.806	931.438	372.486	807.093	371.728	532.87	456.741	538.489	825.891	567.165	396.494	1096.79	341.681	894.516	406.412	358.827	533.582	519.026	268.551	1595.1	679.796	971.583	976.649	357.524	829.033	528.188	248.051	304.559	396.792	1181.82	646.763
A0A0A0MT36	2458.03	1598.24	389.624	179.707	1722.06	351.819	454.315	517.087	3200.47	762.963	775.495	5274.8	413.242	1904.87	1761.44	2129.59	120.435	1138.31	1910.58	2376.93	385.393	3427.61	877.064	1581.78	966.211	498.926	848.05	508.478	765.215	2667.39	337.471	482.267	179.495	1455.53	1440.55	969.288	1136.97	1017.64	500.684
A0A0B4J1U7	533.265	127.277	298.465	299.097	316.453	210.367	270.796	410.45	216.45	358.24	248.73	518.948	838.123	339.523	554.645	234.535	413.953	363.771	766.081	665.62	199.996	315.829	164.052	164.718	984.557	127.799	190.067	268.679	303.721	251.031	342.643	205.872	156.871	472.122	507.78	247.369	322.295	588.389	567.647
A0A0B4J1V0	1703.45	786.699	2511.34	453.522	1052.21	650.35	459.214	1400.68	883.956	1272.69	884.56	907.05	993.76	485.024	911.135	865.092	811.934	738.026	1345.86	1111.08	698.357	1175.41	766.692	575.534	1314.31	590.598	340.046	1113.51	893.03	1147.35	1055.3	197.067	575.602	718.837	816.752	308.442	819.43	1167.51	1089.92
A0A0B4J1V2	86.7508	102.684	41.2471	23.7288	48.1941	84.9409	158.082	127.905	79.5392	78.3805	34.4685	112.22	67.8947	63.3734	57.0079	49.357	94.5273	57.5328	146.258	103.327	174.238	99.1368	75.4284	54.1192	91.0234	102.262	43.0082	35.8346	69.1667	39.217	495.72	72.9771	30.2413	33.3487	117.825	5.35919	60.8244	133.435	71.7147
A0A0B4J1V6	2835.59	1442.15	2387.48	1787.09	3173.03	1863.59	1137.79	2575.55	1622.38	2727.82	1521.99	3304.28	2632.48	1370.36	2550.5	2528.88	2749.01	1932.72	3360.11	3303.38	1870.41	2863.47	1567.6	1523.97	2356.84	1449.05	1103.7	2306.86	1182.77	2549.83	2067.7	1246.24	1188.6	2633.46	1507.07	684.882	1917.67	4589.18	2332.35
A0A0B4J1X5	265.932	237.873	229.315	256.057	343.266	275.838	199.622	221.14	149.305	297.591	167.204	296.171	355.742	229.633	330.192	307.277	250.759	353.002	154.447	378.964	179.732	380.141	175.521	181.253	309.85	174.798	130.628	430.556	164.868	317.291	152.831	270.96	273.729	198.127	358.142	160.132	209.304	399.478	214.59
A0A0B4J1X8	6687.74	8159.38	16039.8	6067.42	5219.82	12690.2	8110.19	20961.9	6723.42	4357.01	7948.24	11799.1	10021.6	8944.19	5859.63	9263.88	10040.5	9140.34	9879.36	10881.6	6436.71	14002.7	4655.15	7241.29	4119.28	10411.6	6545	7274.33	6984.6	8218.4	16119.6	7188.33	4122.24	4193.85	12173	5786.24	6526.5	9424.2	5044.95
A0A0B4J1Y8	1608.24	515.43	540.069	712.2	622.58	510.134	378.4	520.781	609.528	1425.07	451.284	1046.21	645.625	503.817	613.957	924.094	537.439	1795.85	602.142	829.001	897.617	46.997	527.933	567.919	623.207	418.033	358.496	1872.34	660.464	1000.82	1107.52	637.081	766.022	442.449	390.728	576.205	313.824	865.177	151.664
A0A0B4J1Y9	22601.1	22241.1	35696.7	20521.7	26245.3	33508.5	16846.5	36499.9	26154.9	19307.4	19069.1	39904.6	30203	21936.5	28632.6	17450.1	32046.1	16692.5	21501.9	31288.6	21216.3	35363	15035.1	16055.9	29771	27652.8	14644.5	19305.9	18332.1	16948.7	21680.5	19509.1	18359.9	19165.5	26582.2	9127.35	23331.7	45247.1	24260.7
A0A0B4J2D9	794.027	773.242	706.393	753.558	402.408	448.884	390.097	1307.11	396.897	1010.49	320.41	703.419	503.631	469.751	317.162	651.036	433.063	514.285	538.658	656.644	1896.82	600.516	551.723	194.288	626.958	357.229	220.841	235.244	488.42	626.339	1091.26	215.623	365.129	201.093	783.388	145.016	278.525	603.941	221.903
A0A0C4DH24	249.51	360.96	463.453	188.51	605.065	116.043	414.412	346.249	369.89	238.276	189.679	678.477	350.05	252.682	492.191	285.215	220.608	312.476	122.497	533.205	72.7532	191.693	318.767	269.233	309.127	111.615	89.4612	1185.29	221.851	251.982	326.391	145.192	155.865	401.34	271.693	221.037	182.993	390.61	275.206
A0A0C4DH29	20076.6	15411	10881	9829.94	45158.5	6051.87	37253.8	44021.8	9908.79	10389.6	12997.7	20566.2	21328.9	15324.9	35858.2	37650.1	22429.7	33239.9	15254.3	20101.9	13198.8	12246.8	15522.5	3246.3	16732.2	8542.49	3874.6	10608.4	13464.6	22012.1	13975.6	4337.46	18293	13714.7	21912.9	5996.93	16574.3	27505	21940.8
A0A0C4DH31	179.538	79.5275	68.3608	118.284	219.862	78.7931	66.6514	123.62	99.0194	241.102	67.7669	124.32	67.2396		113.828	186.708	87.0928	192.045	109.818	104.982		82.4961	127.11	93.9927	126.767	40.5996	56.4284		75.3818	61.2454	108.155	53.0514	62.6886	67.1738	53.6341	89.9676	115.144	188.191	84.4508
A0A0C4DH32	494.252	2297.77	411.009	675.059	550.194	615.93	625.652	1199.85	249.442	1066.15	182.116	401.905	639.349	507.043	219.77	746.159	282.957	877.761	247.063	165.21	210.576	893.94	166.066	226.769	277.532	773.767	119.181	529.096	412.033	1197.22	351.08	351.587	933.334	1983.9	777.164	270.199	587.001	1406.02	1163.91
A0A0C4DH34	204.318	71.7948	241.624	156.055	168.609	168.979	82.0771	375.177	131.219	278.587	48.8117	207.393	158.652	92.4109	256.785	107.528	125.472	42.6657	173.067	125.241	153.498	140.758	140.485	78.3291	201.014	84.4676	52.9984	114.066	66.6681	62.2498	188.154	92.0923	65.3277	183.531	119.799	39.2457	130.155	170.246	62.6988
A0A0C4DH35	5780.11	1286.23	28505.3	2084.31	2093.34	3244.15	2614.22	4867.23	1386.92	3441.55	2211.23	3878.72	4705.64	849.338	4297.32	2391.3	2351.49	1929.11	7524.77	4986.26	2000.41	3465.76	2122.56	1338.16	3918.75	2060.06	798.496	712.216	1350.55	2793.59	2606.59	1567.29	800.438	3002.56	3025.9	348.748	2409.39	1532.97	2476.76
A0A0C4DH36	1382.61	652.337	881.296	639.349	707.357	909.032	221.983	1039.22	485.053	1006.06	478.132	709.881	749.679	264.966	763.229	1619.11	402.225	287.017	1042.46	544.656	435.13	614.336	462.458	254.083	835.613	520.213	200.499	552.694	253.803	380.11	1498.97	290.733	352.895	618.667	604.618	511.453	396.413	1060.61	388.263
[truncated: 625 more rows]

## Sheet: DIANN-serum EV
Protein.Group	AC1	AC2	AC3	AC4	AC5	AC6	AC7	AC8	AC9	AC10	AC11	AC12	AC13	AC14	AC15	AC16	AC17	AC18	AC19	AC20	AD1	AD2	AD3	AD4	AD5	AD6	AD7	AD8	AD9	AD10	AD11	AD12	AD13	AD14	AD15	AD16	AD17	AD18	AD19
[truncated: 821 more rows]

## Sheet: PEAKS-serum EV
Protein.Group	AC1	AC2	AC3	AC4	AC5	AC6	AC7	AC8	AC9	AC10	AC11	AC12	AC13	AC14	AC15	AC16	AC17	AC18	AC19	AC20	AD1	AD2	AD3	AD4	AD5	AD6	AD7	AD8	AD9	AD10	AD11	AD12	AD13	AD14	AD15	AD16	AD17	AD18	AD19
[truncated: 488 more rows]
