# Supplementary material for: A comprehensive view of the molecular features within the serum and serum EV of Alzheimer's disease
Source: Royal Society of Chemistry journal article supplement (doi:10.1039/d4an01018c), 2025-01-01
Supplement: d4an01018c7.xlsx [file d4an01018c7.xlsx]

## Sheet: Quantification
	AC1	AC2	AC3	AC4	AC5	AC6	AC7	AC8	AC9	AC10	AC11	AC12	AC13	AC14	AC15	AC16	AC17	AC18	AC19	AC20	AD1	AD2	AD3	AD4	AD5	AD6	AD7	AD8	AD9	AD10	AD11	AD12	AD13	AD14	AD15	AD16	AD17	AD18	AD19
A0A075B6H9	8866.33	6007.94	7890.07	5653.45	5336.45	4273.62	6171.61	6017.45	5499.95	7077.46	5290.15	8471.79	5926.99	1968.69	6491.4	9403.57	7061.72	6648.71	3289.32	8271.26	3346.52	7886.9	5757.17	6329.28	8151.24	2728.23	2905.68	3165.29	6066.14	8506.56	10555.4	4558.25	5202.22	11265.1	9586.29	5784.19	6391.9	9373.21	6883.74
A0A075B6I0	1070.72	558.988	5039.41	182.358	1113.13	824.659	147.491	975.221	219.795	645.618	817.858	946.022	582.217	415.018	707.483	1457.45	207.152	138.541	758.289	701.518	604.361	1747.04	145.133	187.076	718.83	1284.52	148.582	876.186	100.671	708.218	572.971	333.448	311.551	571.823	530.955	669.588	255.696	1911.32	876.224
A0A075B6I1	1247.86	911.563	880.823	367.711	2242.39	583.815	445.056	1145.54	863.095	2596.17	898.252	1965.79	1216.74	542.614	1040.18	1436.46	1354.12	334.171	831.261	993.972	82.1358	257.686	302.421	193.664	2255.52	489.944	1115.27	759.088	407.7	108.533	4078.7	118.235	912.782	202.397	1177.81	1489.88	89.7778	314.057	169.001
A0A075B6I4	3143.05	1204.04	1435.81	500.943	716.525	2663.31	864.514	1683.4	1190.1	1255.11	754.293	1989.22	2249.73	1325.8	1818.49	545.948	1790.05	1190.44	64.8696	2387.03	1579.79	1111.24	308.237	347.555	1693.44	5462.03	1057.99	1404.42	917.791	1720.33	62.5227	1142.8	81.7586	1356.87	1368.64	1502.11	72.3393	2295.5	909.608
A0A075B6I7	449.095	334.372	969.596	547.813	497.53	347.659	555.341	923.653	524.901	1395.62	708.923	976.873	211.579	264.86	483.777	605.608	908.012	217.037	500.301	800.549	326.482	960.851	176.802	104.327	721.573	334.404	367.647	744.449	401.479	630.562	1084.23	492.821	644.817	217.576	4383.48	346.071	450.233	627.685	353.644
A0A075B6I9	2544.15	1943.73	3091.72	2954.92	1936.14	1972.63	1956.06	2579.68	4619.25	1496.03	2758.89	3049.47	3549.71	2125.41	2169	2532.64	3625.78	1476.98	3206.82	5806.56	2060.58	4028.95	1370.36	1772.48	3741.42	1615.05	1984.55	4681.66	1588.79	1920.09	2169.12	2015.15	2269.04	2676.2	5420.78	2726.62	2547.5	7790.74	1867.88
A0A075B6J1	24.7925	42.8465	123.38	47.1354	58.8206	23.8175	49.6625	50.1823	52.2348	40.1773	20.0924	129.993	21.6605	107.023	19.0542	59.6735	83.0749	64.208	54.5478	46.576	20.567	109.823	62.7775	16.0837	61.0829	155.866	56.9277	72.7881	46.9167	24.8831	683.759	39.4053	38.3735	74.0837	94.8453	137.897	126.335	202.234	57.8032
A0A075B6J9	2250.49	1303.28	2172.67	1477.37	2184.17	1658.22	1035.01	2519.74	1169.59	1239.05	491.355	1972.42	1157.88	386.1	1340.25	2472.94	4052.03	1300.99	1536.54	1357.92	2074.74	852.875	1239.28	667.939	1361.73	1009.69	492.485	356.389	821.903	786.737	5108.27	431.515	462.274	1194.51	769.447	776.76	1847.6	2487.2	1347.97
A0A075B6K0	476.806	319.912	495.903	249.647	86.7553	307.179	209.967	93.4932	221.711	359.735	269.846	110.912	231.818	109.372	423.665	785.618	143.144	149.305	25.8983	388.145	23.8184	165.708	262.78	95.6909	175.171	86.209	56.2314	292.775	131.768	136.954	143.024	83.9406	260.563	326.395	219.411	221.925	165.822	422.394	136.013
A0A075B6K4	2221.38	3927.89	6857.58	3045.38	901.234	2102.37	2189.59	3696.07	6597.41	3031.54	1175.8	527.502	2787.67	1462.28	2655.5	7367.64	2500.73	1623.89	6943.77	2463.5	2604.44	1735.07	2231.69	1450.18	1330.75	1465.99	1356.92	3743.01	1804.91	2717.75	5551.35	979.407	2776.25	2500.19	1810.76	2941.44	1384.21	3105.39	1283.56
A0A075B6K5	1958.19	1423.47	1298.01	1805.36	1842.18	1802.81	1708.52	2850.96	2366.73	1992	1059.21	2763.56	1128.86	1519.09	2360.44	3690	2851.71	1634.16	783.46	2871.07	4833.57	2628.09	1112.59	1294.8	1099.34	1333.76	783.395	1991.21	2182.62	2355.88	4030.34	1657.89	2379.1	700.861	1960.4	2803.78	1174.23	2043.87	575.011
A0A075B6P5;P01615	1450.47	2342.74	1419.63	1463	1384.56	1547.24	1415.57	2166.72	2788.48	1077.24	1292.6	3934.19	2372.13	1483.99	2069.23	1186.5	2785.21	1855.56	1702.37	4373.31	1472.02	2775.6	967.289	1278.43	1059.22	2974.85	1509.06	2600.01	1448.4	1926.39	1833.94	2024.87	1778.14	1310.58	4078.86	835.721	4103.46	4082.74	1724.59
A0A075B6Q5	2720.97	733.531	3228.23	1628.54	1090.33	1008.1	663.979	4048.13	1585.7	2105.35	699.197	1942.55	608.657	689.3	1431.13	2044.22	1227.66	1201.06	1250.44	1567.8	4855.71	1485.8	699.214	566.212	1521.53	864.431	400.327	1455.1	742.414	1009.61	721.248	581.189	949.105	814.248	1835.08	402.01	739.422	5178.54	873.499
A0A075B6S2	22759.3	15524.2	16882.6	12416.2	11321.4	13540.1	10936.3	14120.3	20139.1	10882.7	10863.7	29049.6	14930.7	11903.2	17583.4	20086.1	2373.19	10285.8	13818.8	23282.6	3025.08	33946.9	8996.68	9995.03	13614	12626	7210.11	15889.3	14811.7	15534.6	9170.2	8050.54	9971.3	9212.93	24739.8	7344.29	12440.2	15685	12879.1
A0A075B6S5	766.497	569.278	405.125	492.014	422.2	430.908	176.465	636.501	412.051	434.971	328.595	776.565	411.325	379.747	547.379	761.745	455.942	244.645	742.762	561.898	543.335	800.625	361.586	626.42	451.54	476.148	320.207	730.104	424.051	432.378	458.129	384.177	477.29	370.785	498.162	380.185	328.851	538.849	361.564
A0A087WSX0	4215.49	2268.35	4225.44	3284.72	2380.76	2825.25	1222.99	3241.59	2691.91	6377.05	3060.68	3485.55	2817.06	1303.27	3428.57	2395.2	4968.88	1300.94	2028.2	12905.7	2982.66	5909.84	1038.31	1066.72	2870.71	1845.16	1368.52	2360.15	1312.33	2161.33	4405.06	2054.15	4202.84	1694.35	9729.3	1197.19	2029.08	2032.96	5608.43
A0A0A0MRZ8;P04433	5558.84	5961.5	6097	4785.24	4186.39	5553.54	5034.18	6029.69	4211.42	3054.72	4012.06	7523.82	8629.69	2813.84	7574.07	2944.16	5056.1	4710.96	5877.88	7194.85	3847.29	8090.8	4004.81	3272.89	7418.84	6281.88	4027.36	2784.22	5566	4531.9	5021.22	3393.77	5754.89	4922.79	7343.16	4744.09	4313.86	10523.9	4508.87
A0A0A0MRZ9	110.978	48.4792	111.004	52.486	57.9992	41.1607	40.5776	19.7267	52.2405	52.1962	29.8159	77.5765	27.4458	47.9987	73.9546	66.5124	63.8358	44.3834	263.993	57.8291	55.8551	92.2378	26.6273	23.1398	74.615	42.6863	38.2254	32.3359	25.3053	24.9852	63.0105	18.5062	22.3472	47.2588	52.6413	29.6569	26.1933	63.9395	25.6379
A0A0A0MS15	607.785	284.261	934.55	926.541	1375.06	888.177	361.178	1114.47	639.806	931.438	372.486	807.093	371.728	532.87	456.741	538.489	825.891	567.165	396.494	1096.79	341.681	894.516	406.412	358.827	533.582	519.026	268.551	1595.1	679.796	971.583	976.649	357.524	829.033	528.188	248.051	304.559	396.792	1181.82	646.763
A0A0A0MT36	2458.03	1598.24	389.624	179.707	1722.06	351.819	454.315	517.087	3200.47	762.963	775.495	5274.8	413.242	1904.87	1761.44	2129.59	120.435	1138.31	1910.58	2376.93	385.393	3427.61	877.064	1581.78	966.211	498.926	848.05	508.478	765.215	2667.39	337.471	482.267	179.495	1455.53	1440.55	969.288	1136.97	1017.64	500.684
A0A0B4J1U7	533.265	127.277	298.465	299.097	316.453	210.367	270.796	410.45	216.45	358.24	248.73	518.948	838.123	339.523	554.645	234.535	413.953	363.771	766.081	665.62	199.996	315.829	164.052	164.718	984.557	127.799	190.067	268.679	303.721	251.031	342.643	205.872	156.871	472.122	507.78	247.369	322.295	588.389	567.647
A0A0B4J1V0	1703.45	786.699	2511.34	453.522	1052.21	650.35	459.214	1400.68	883.956	1272.69	884.56	907.05	993.76	485.024	911.135	865.092	811.934	738.026	1345.86	1111.08	698.357	1175.41	766.692	575.534	1314.31	590.598	340.046	1113.51	893.03	1147.35	1055.3	197.067	575.602	718.837	816.752	308.442	819.43	1167.51	1089.92
A0A0B4J1V2	86.7508	102.684	41.2471	23.7288	48.1941	84.9409	158.082	127.905	79.5392	78.3805	34.4685	112.22	67.8947	63.3734	57.0079	49.357	94.5273	57.5328	146.258	103.327	174.238	99.1368	75.4284	54.1192	91.0234	102.262	43.0082	35.8346	69.1667	39.217	495.72	72.9771	30.2413	33.3487	117.825	5.35919	60.8244	133.435	71.7147
A0A0B4J1V6	2835.59	1442.15	2387.48	1787.09	3173.03	1863.59	1137.79	2575.55	1622.38	2727.82	1521.99	3304.28	2632.48	1370.36	2550.5	2528.88	2749.01	1932.72	3360.11	3303.38	1870.41	2863.47	1567.6	1523.97	2356.84	1449.05	1103.7	2306.86	1182.77	2549.83	2067.7	1246.24	1188.6	2633.46	1507.07	684.882	1917.67	4589.18	2332.35
A0A0B4J1X5	265.932	237.873	229.315	256.057	343.266	275.838	199.622	221.14	149.305	297.591	167.204	296.171	355.742	229.633	330.192	307.277	250.759	353.002	154.447	378.964	179.732	380.141	175.521	181.253	309.85	174.798	130.628	430.556	164.868	317.291	152.831	270.96	273.729	198.127	358.142	160.132	209.304	399.478	214.59
A0A0B4J1X8	6687.74	8159.38	16039.8	6067.42	5219.82	12690.2	8110.19	20961.9	6723.42	4357.01	7948.24	11799.1	10021.6	8944.19	5859.63	9263.88	10040.5	9140.34	9879.36	10881.6	6436.71	14002.7	4655.15	7241.29	4119.28	10411.6	6545	7274.33	6984.6	8218.4	16119.6	7188.33	4122.24	4193.85	12173	5786.24	6526.5	9424.2	5044.95
A0A0B4J1Y8	1608.24	515.43	540.069	712.2	622.58	510.134	378.4	520.781	609.528	1425.07	451.284	1046.21	645.625	503.817	613.957	924.094	537.439	1795.85	602.142	829.001	897.617	46.997	527.933	567.919	623.207	418.033	358.496	1872.34	660.464	1000.82	1107.52	637.081	766.022	442.449	390.728	576.205	313.824	865.177	151.664
A0A0B4J1Y9	22601.1	22241.1	35696.7	20521.7	26245.3	33508.5	16846.5	36499.9	26154.9	19307.4	19069.1	39904.6	30203	21936.5	28632.6	17450.1	32046.1	16692.5	21501.9	31288.6	21216.3	35363	15035.1	16055.9	29771	27652.8	14644.5	19305.9	18332.1	16948.7	21680.5	19509.1	18359.9	19165.5	26582.2	9127.35	23331.7	45247.1	24260.7
A0A0B4J2D9;P0DP09	794.027	773.242	706.393	753.558	402.408	448.884	390.097	1307.11	396.897	1010.49	320.41	703.419	503.631	469.751	317.162	651.036	433.063	514.285	538.658	656.644	1896.82	600.516	551.723	194.288	626.958	357.229	220.841	235.244	488.42	626.339	1091.26	215.623	365.129	201.093	783.388	145.016	278.525	603.941	221.903
A0A0C4DH24	249.51	360.96	463.453	188.51	605.065	116.043	414.412	346.249	369.89	238.276	189.679	678.477	350.05	252.682	492.191	285.215	220.608	312.476	122.497	533.205	72.7532	191.693	318.767	269.233	309.127	111.615	89.4612	1185.29	221.851	251.982	326.391	145.192	155.865	401.34	271.693	221.037	182.993	390.61	275.206
A0A0C4DH29	20076.6	15411	10881	9829.94	45158.5	6051.87	37253.8	44021.8	9908.79	10389.6	12997.7	20566.2	21328.9	15324.9	35858.2	37650.1	22429.7	33239.9	15254.3	20101.9	13198.8	12246.8	15522.5	3246.3	16732.2	8542.49	3874.6	10608.4	13464.6	22012.1	13975.6	4337.46	18293	13714.7	21912.9	5996.93	16574.3	27505	21940.8
A0A0C4DH31	179.538	79.5275	68.3608	118.284	219.862	78.7931	66.6514	123.62	99.0194	241.102	67.7669	124.32	67.2396	103.689	113.828	186.708	87.0928	192.045	109.818	104.982	72.1603	82.4961	127.11	93.9927	126.767	40.5996	56.4284	91.6329	75.3818	61.2454	108.155	53.0514	62.6886	67.1738	53.6341	89.9676	115.144	188.191	84.4508
A0A0C4DH32	494.252	2297.77	411.009	675.059	550.194	615.93	625.652	1199.85	249.442	1066.15	182.116	401.905	639.349	507.043	219.77	746.159	282.957	877.761	247.063	165.21	210.576	893.94	166.066	226.769	277.532	773.767	119.181	529.096	412.033	1197.22	351.08	351.587	933.334	1983.9	777.164	270.199	587.001	1406.02	1163.91
A0A0C4DH34	204.318	71.7948	241.624	156.055	168.609	168.979	82.0771	375.177	131.219	278.587	48.8117	207.393	158.652	92.4109	256.785	107.528	125.472	42.6657	173.067	125.241	153.498	140.758	140.485	78.3291	201.014	84.4676	52.9984	114.066	66.6681	62.2498	188.154	92.0923	65.3277	183.531	119.799	39.2457	130.155	170.246	62.6988
A0A0C4DH35	5780.11	1286.23	28505.3	2084.31	2093.34	3244.15	2614.22	4867.23	1386.92	3441.55	2211.23	3878.72	4705.64	849.338	4297.32	2391.3	2351.49	1929.11	7524.77	4986.26	2000.41	3465.76	2122.56	1338.16	3918.75	2060.06	798.496	712.216	1350.55	2793.59	2606.59	1567.29	800.438	3002.56	3025.9	348.748	2409.39	1532.97	2476.76
A0A0C4DH36	1382.61	652.337	881.296	639.349	707.357	909.032	221.983	1039.22	485.053	1006.06	478.132	709.881	749.679	264.966	763.229	1619.11	402.225	287.017	1042.46	544.656	435.13	614.336	462.458	254.083	835.613	520.213	200.499	552.694	253.803	380.11	1498.97	290.733	352.895	618.667	604.618	511.453	396.413	1060.61	388.263
A0A0C4DH38	7339.67	7478.14	7366.25	9200.8	5963.91	8298.6	9825.1	12036	9497.36	2229.97	5621.81	10756.4	6689.19	10056.7	10592.8	10642.5	10207.6	6469.54	7921.76	12894.1	4607.72	13103.6	6818.6	6892.76	11150.5	6754.88	3910.38	8024.24	8427.67	7478.04	10708.6	6180.94	9411.94	6869.23	5172.53	4061.54	9081.95	13017.4	8675.9
A0A0C4DH43	202.637	253.813	315.824	275.018	417.453	119.409	82.2565	182.759	140.484	89.3747	30.0263	188.901	414.82	138.462	138.462	252.009	364.131	42.968	185.534	284.004	130.684	127.154	96.7147	69.8052	84.2315	145.129	91.9399	131.447	110.187	186.325	198.365	52.2133	124.649	83.2558	170.436	52.4344	44.0669	148.394	143.571
A0A0C4DH67	2003.83	1481.39	2117.22	1479.81	1011.64	2360.28	1258.77	2068.71	1591.32	1505.97	1166.22	1614.01	1857.28	1002.41	2169.48	1852.48	2322.19	1316.18	1833.35	3057.02	1944.98	2226.93	1184.6	977.293	2436.99	1953.97	530.218	492.855	1232.45	1540.16	2443.56	947.015	1158.55	921.94	1837.26	798.63	1346.08	4104.99	1919.6
A0A0C4DH68	5817.11	3224.6	5285	3573.32	2485.64	2191.41	1866.32	3913.53	2658.31	3216.53	1994.66	4445.92	7113.1	3760.97	4320.18	5398.85	6562.54	2931.26	2536.36	5273.39	10013.3	5201.06	2530.12	2352.81	3123.01	3048.98	1558.46	3317.85	4239.93	2767.86	5423.22	3080.43	3797.69	2436.63	3949.33	1410.21	2118.98	8085.56	3870.07
A0A0C4DH73;P01611	3424.23	2402.18	2047.94	3051.39	3044.98	2819.61	2496.48	4410.03	3238.34	3901.9	1751.51	4707.86	3843.52	2051.26	4386.78	2681.85	3457.01	2483.89	3595.58	4734.21	3537.83	3548.11	2508.21	2513.07	3411.56	1887.66	1336.61	3929.01	2566.51	3308.01	3571.9	1692.4	1841.01	2555.92	3192.53	2156.14	2798.35	5188.29	3028.28
A0A0G2JS06	424.815	93.971	891.494	153.675	159.547	40.0989	44.877	868.092	205.845	118.939	108.054	330.899	72.6989	71.9252	204.965	140.194	220.288	108.126	170.394	958.359	123.682	342.33	391.789	391.789	110.934	63.4365	148.913	307.327	132.55	104.395	140.569	36.7494	162.946	34.353	372.806	113.757	350.451	90.325	95.8734
A0A0J9YX35	1639.03	625.871	2676.4	956.376	1083.96	884.357	1438.01	1230.21	795.722	466.122	946.004	1403.48	2042.76	685.019	1200.15	697.308	1432.94	1093.62	2214.84	1581.19	655.764	1473.09	1095.08	719.11	1634.55	611.695	513.925	800.77	616.745	1487.38	1055.44	532.482	604.26	529.402	710.734	247.325	963.719	862.44	948.859
A0M8Q6	202291	57566.9	107474	54440.1	68200.7	77320.1	113562	185580	55191.9	88492	53657.8	133233	174257	62922.3	136748	66280.2	167550	75533.4	100812	128287	47848.4	146264	69802.8	69688.9	64686.2	111635	63803.1	111727	51169.4	91381.2	186870	69719.4	130900	96143	94392.9	72925.8	151424	130818	54562.8
A1L4H1	5986.11	6969.7	6079.62	9215.13	11191	8134.51	7354.16	11113.8	7999.4	6226.49	4977.18	5455.67	10492.2	5900.05	4858.49	8519.94	5482.28	8504.78	4735.7	5634.56	10487.7	7898.43	10903.4	11350	8150.99	5695.78	8117.47	7653.47	8009.36	8113.24	5994.27	9671.67	7547.37	6787.81	6060.48	7405.87	6083.99	4552.01	5511.71
A2NJV5	1100.13	458.152	515.701	526.375	541.257	506.042	448.496	109.249	1279.12	264.675	423.222	1777.48	464.183	801.443	765.807	1329.69	61.688	665.521	813.118	1010.54	534.507	981.444	320.81	420.089	376.261	324.758	455.38	436.422	520.243	693.466	663.601	113.209	244.503	273.859	1184.12	458.363	450.995	69.8278	718.079
A2VEC9	36.5287	45.562	34.4749	38.1438	4.85825	5.32911	20.0241	11.3367	14.5579	18.8381	7.10714	10.5319	11.3576	6.48257	11.4882	15.5831	19.4483	18.2727	42.2968	10.1011	56.699	49.1372	91.4691	65.5529	91.3995	10.4571	7.75436	15.5756	4.80505	15.7314	18.674	9.15983	14.8517	30.4172	28.8213	17.5207	45.8493	10.2131	46.5378
A6NMZ7	44.0434	18.3951	8.0475	23.0762	12.7294	58.0143	17.1374	7.96432	4.50578	18.7439	14.4865	11.5578	8.34534	6.75605	13.1594	11.6545	12.4614	6.79775	16.6661	10.4069	17.6076	14.5688	5.64942	7.79832	16.5839	50.9196	7.99382	15.861	8.14547	13.8816	12.84	16.5109	15.5088	10.976	19.0205	12.4273	14.9011	11.0738	21.279
A8TX70	13.8736	11.4159	7.05265	13.4939	8.6286	13.9585	9.97881	8.8306	12.2388	11.9184	13.3611	11.1379	9.03791	10.5738	3.20563	11.8139	11.1996	12.6899	8.18613	7.62881	8.88121	14.2627	3.28502	7.67225	4.54142	16.8886	9.49973	2.83688	10.2894	13.4532	21.2348	8.16425	15.8099	4.17076	13.3613	10.1629	10.3545	13.7047	7.67225
O00151	59.1185	51.8728	59.9207	28.9801	53.2021	66.6805	71.1535	60.679	59.2446	54.7815	43.8911	56.9163	56.5907	87.7479	46.7331	33.722	58.7657	73.6983	51.0699	68.2387	61.4502	15.4649	25.121	26.448	49.288	62.6788	38.2967	59.1618	60.7029	58.203	67.7725	43.0804	81.9904	111.539	70.6377	62.4801	58.0218	36.9032	80.7222
O00161	17.9028	19.1636	30.4999	20.5263	42.3959	27.1023	18.4459	11.7732	13.1406	33.7301	13.7467	22.6082	20.3829	14.165	20.7928	43.9373	19.7542	39.5515	21.581	16.6079	29.7516	23.9421	33.7453	25.1324	4.33311	28.6796	17.3758	19.8037	25.2184	17.7444	30.7489	12.8197	21.2613	67.9926	12.7729	21.8557	39.5147	67.1688	50.0859
O00187	3217.92	2736.84	2736.69	2810.29	2995.19	3688.72	2663.95	4325.03	2079.51	3200.8	1823.97	3175.53	3115.89	2723.06	2204.17	2543.55	1900.55	3125.72	3737.03	2387.15	3058.54	2340.09	2818.85	2887.93	2753.96	3274.91	1879.4	2747.89	2032.75	2669.9	3559.08	2681.81	1954.25	2922.28	2191.03	3147.57	2105.19	2024.33	2746.48
O00391	60.3539	42.4956	59.1196	36.724	96.4303	66.2076	87.6614	36.7037	39.4751	68.5801	72.1245	42.6769	101.524	86.6307	83.2843	50.3175	57.6526	66.3548	81.3356	75.3764	45.3051	38.9769	78.3495	73.7636	75.3469	64.8324	59.3862	85.7838	40.53	67.4834	60.0302	45.0184	144.286	44.2586	44.0816	47.0538	55.416	84.185	74.2369
O00463	90.8554	82.6332	81.8783	87.5609	79.5734	105.03	30.744	99.3876	96.968	92.4482	90.5667	111.387	115.93	79.1699	97.8172	60.0345	138.327	60.5103	96.5475	134.398	64.1229	146.335	78.2035	85.328	56.5578	114.593	52.0211	31.9991	84.2636	103.938	120.772	82.2024	52.157	75.5816	86.2269	129.671	56.9129	187.516	76.4
O00468	20.7732	20.8389	6.80999	24.3175	13.8312	27.6625	25.8254	12.3197	15.7421	9.82179	21.8951	13.1654	11.4546	19.3515	6.88201	29.1222	10.5959	22.3701	10.7466	12.2232	24.1902	16.0934	8.99919	12.0139	15.8629	16.9123	22.8547	11.2978	15.4988	8.86009	19.274	21.13	5.45065	18.6601	16.0243	20.6592	12.8926	26.7501	17.2372
O00501	56.6118	89.8092	47.8732	69.0477	51.8156	28.7923	69.308	37.3371	37.4604	40.4453	39.9376	42.4614	24.596	58.0929	64.486	40.0051	68.2345	45.2352	46.9819	34.3962	71.7499	48.641	91.9785	58.065	32.6964	33.1118	72.772	68.8501	80.9564	83.4488	52.2645	39.1125	61.4325	66.2644	56.0981	43.5835	69.958	45.3859	85.1996
O00533	51.4262	67.804	71.8369	72.0912	58.1516	100.742	65.3879	66.0253	106.062	71.5192	67.4654	72.3279	75.5593	56.7307	72.5422	77.6422	73.8049	92.1031	46.0853	35.1861	50.646	62.9336	25.56	41.0364	36.6592	69.7063	41.2932	106.99	63.2314	76.9245	85.5637	54.0948	54.7375	27.0067	59.2917	106.583	46.5327	101.957	16.2363
O00560	255.773	338.907	389.606	401.887	283.398	219.802	273.266	232.766	294.821	219.404	285.299	181.867	148.804	173.898	321.288	229.433	197.641	211.538	180.776	328.99	386.671	157.772	381.487	409.722	222.119	212.408	283.989	137.89	251.565	262.906	161.026	204.98	200.469	249.075	206.944	166.251	201.674	122.248	369.302
O00592	210.441	257.585	209.445	303.729	209.523	177.172	180.242	306.048	200.875	170.304	177.889	204.726	159.095	192.104	162.641	210.467	211.478	222.964	234.43	157.937	199.568	133.46	309.219	286.881	125.49	144.746	121.553	192.65	255.213	222.987	178.226	227.24	121.865	233.483	167.52	154.577	181.461	222.175	160.807
O00602	151.028	49.4316	255.571	189.452	251.681	161.523	31.5305	132.675	199.983	127.46	132.742	107.711	162.99	111.705	160.576	156.077	217.602	91.5235	156.736	56.4233	413.982	152.788	220.272	221.155	178.516	126.81	128.611	176.421	146.662	205.563	291.129	183.055	167.56	313.007	133.917	123.657	172.471	463.489	213.862
O14672	279.187	282.625	572.612	578.53	386.067	126.446	243.127	429.939	275.627	230.236	932.115	256.528	153.333	470.595	239.824	342.711	288.981	742.858	283.897	160.46	248.56	211.202	201.124	234.938	140.23	178.918	603.618	548.384	982.809	185.132	157.718	175.368	202.582	299.788	491.774	264.505	272.387	243.59	253.12
O14791	29727.8	20878.4	44834.4	21834.3	13029.7	15229.3	18403.8	31108.1	8574.27	20651.7	13169	34400.9	16153.7	18123.2	24542.2	17795.8	18732.6	25232	17231.5	25108.2	16862.5	26298.4	16125.8	16060.8	19405.5	20795.5	18415.1	30443.1	16947.2	19276.1	23290.2	16072.8	21278.8	14991	21849	16334.8	16105.7	35400.6	22100
O14950;P19105	213.757	349.527	227.3	218.284	332.953	287.214	238.675	193.456	95.8774	359.364	198.36	290.855	200.386	381.772	177.168	333.415	230.195	251.326	271.205	156.076	152.072	280.805	204.898	198.228	182.411	166.925	188.593	190.028	166.373	297.115	96.8663	193.533	213.113	270.839	153.009	211.568	353.341	313.558	234.2
O15143	16.426	22.056	39.0253	18.9546	35.2686	44.1537	15.0108	8.36057	16.0882	9.86556	23.5134	20.5081	23.8401	42.3307	32.2413	31.9064	28.8838	34.1699	19.3804	27.1222	1.33331	16.7177	15.8867	23.3058	24.2364	44.8516	20.0251	11.1478	34.1344	16.9168	47.9949	7.36442	22.2542	166.662	34.9505	25.6948	63.9728	35.5487	39.3637
O15162	47.1539	32.5683	36.1733	62.1495	59.7333	32.936	39.4733	29.8753	43.533	36.1406	45.3052	9.05484	33.1704	18.2282	60.0686	34.2741	45.6442	22.7266	16.1249	25.5248	47.648	37.4667	41.5244	39.4481	49.0121	38.8766	17.9172	38.1333	30.6573	32.5766	12.0522	30.7624	37.4398	46.1437	36.0031	27.999	36.7309	33.3703	37.8081
O15204	205.89	150.364	105.999	182.15	190.972	507.649	70.8001	400.44	193.402	383.83	112.068	359.45	168.385	120.901	121.843	76.658	183.205	73.8279	37.8095	167.924	95.3482	222.859	173.209	153.073	133.533	141.245	101.799	64.6999	53.9383	131.983	37.7622	80.4244	61.6002	132.507	162.609	72.0082	147.958	154.906	135.561
O15400	76.8804	127.149	139.931	125.811	151.107	68.1157	99.4457	81.3566	92.924	65.6399	79.0291	69.4389	50.3412	98.4752	75.4141	61.9652	76.9381	64.7118	50.784	70.7014	87.5355	97.8516	52.002	55.6815	60.893	77.4443	66.7795	152.12	87.6485	52.5493	61.0835	50.1298	69.3948	91.4665	42.404	117.16	57.1639	25.6191	35.2834
O43707	61.7883	49.4067	85.5338	68.3468	78.0123	32.9259	69.8861	54.6446	32.5142	109.386	34.3509	107.695	45.4503	106.416	64.9582	94.1035	150.619	58.634	122.765	90.7002	103.564	102	55.4073	32.1906	40.9313	21.9501	40.0789	36.8686	53.4401	34.451	152.167	50.4525	64.3156	238.927	44.0153	58.5615	110.773	72.365	66.1979
O43866	53986.9	34760.5	71578.7	35248.2	33116.6	38898.7	37856.7	54576.5	52749	38735.3	25201.3	58962	49723	36085.5	45429.7	31936.4	56220.8	32008.1	43857	61503.3	31822.6	59216.6	24155.9	26054.1	36936.9	46832.1	27115.2	43488	29399.4	35274.5	41730.1	30869.4	37082.7	28429.8	49291.3	26722.3	33586.5	64932.9	31199.2
O60281	69.4028	76.0854	73.1703	77.7556	48.5452	118.094	54.6711	85.0295	70.7748	45.7045	65.0563	42.3914	61.0254	27.4415	53.9988	57.2809	49.4241	42.5322	66.4674	59.0643	85.5579	46.8176	50.4169	50.4976	46.7855	103.265	45.4062	41.4701	82.2793	57.2745	127.302	40.258	39.8574	54.8178	34.9027	90.9076	28.5599	48.2808	50.7876
O60613	43.0046	16.0266	16.571	24.6764	28.7882	21.9348	12.5955	11.5019	20.5302	12.5071	18.0411	20.3524	21.6444	24.242	4.50376	34.4441	14.348	21.6261	32.3921	21.7741	18.9197	21.4371	23.0953	21.3221	28.6686	16.9483	21.1524	23.6571	14.7938	21.8601	26.43	22.9456	20.1705	19.4602	17.3169	31.5513	21.4231	21.7183	18.0885
O60636	244.451	157.972	400.084	686.233	339.687	153.595	134.505	220.131	147.48	110.998	92.6242	128.713	49.3865	66.0452	129.996	116.248	128.329	153.055	115.922	245.296	287.322	56.7094	397.704	232.935	81.813	146.746	194.512	74.112	200.39	123.654	110.226	61.7975	85.8549	197.43	201.454	46.9472	329.472	327.558	161.854
O60667	8.28316	5.81637	8.96562	7.79002	12.7294	4.81247	6.78394	8.5012	6.0491	7.26849	7.57873	7.88225	7.85481	7.19398	22.9036	2.36059	5.94299	1.2039	8.33292	3.74733	8.6964	14.4813	2.33831	10.1449	4.37468	7.51523	2.03678	10.3612	11.6511	5.90275	5.67514	6.91417	7.06417	6.41682	4.65234	5.70522	15.7346	8.4766	3.6614
O60814;P06899;P23527;P33778;P57053;P58876;P62807;Q16778;Q5QNW6;Q8N257;Q93079;Q96A08;Q99877;Q99879;Q99880	98.5493	492.874	1010.63	413.125	512.752	231.391	372.156	588.662	18.5071	374.291	74.0244	94.5168	69.4098	266.239	73.0635	695.352	81.3888	143.132	879.041	167.332	117.55	121.458	320.582	289.665	223.689	54.2811	119.874	41.2025	93.0819	37.8457	34.5635	26.2733	35.1169	24.8773	67.2863	26.5982	57.4498	32.0641	128.818
O75015	98.8937	56.8657	108.963	57.5354	123.478	56.3237	106	55.0979	34.6107	84.3521	26.7584	22.156	45.6759	54.8119	68.3698	39.8885	36.3989	37.756	30.1717	40.3281	78.1502	24.3648	106.214	77.3857	83.2376	46.562	69.7905	128.108	44.4641	31.0575	36.9449	37.5161	57.4131	47.1392	35.4768	46.0206	73.4323	149.786	90.2668
O75083	30.2522	30.659	38.5934	27.6535	19.8615	25.5632	33.1029	29.7176	27.9063	53.2034	27.4355	27.9286	33.6633	56.982	33.5002	48.7678	53.3055	27.1042	33.8925	67.9165	38.0411	40.4792	36.9814	30.1083	36.8889	14.8477	39.5625	34.8901	45.6377	29.0988	28.6314	29.1966	58.296	213.234	62.4453	47.1607	86.6624	45.0332	57.025
O75340	91.7948	99.6457	209.234	135.988	93.6944	51.4252	108.346	48.2107	65.9665	53.0936	219.612	39.9905	86.2353	89.5158	67.7201	60.3735	61.7282	74.1973	63.5392	74.9116	98.1142	93.4916	93.9327	44.9711	75.2544	41.2343	146.414	116.204	119.272	32.1985	67.2335	17.663	20.7454	90.0971	110.556	30.2772	106.259	87.7386	109.297
O75369	177.485	117.151	138.001	171.961	179.836	139.428	140.002	87.0706	63.4065	128.111	65.4406	109.083	151.539	140.654	162.289	157.913	126.546	109.886	71.0613	83.6289	204.698	101.878	182.885	162.742	194.386	126.775	127.001	130.299	110.624	116.201	114.646	81.746	197.48	116.73	134.548	96.221	126.909	84.7552	169.453
O75531	42.4237	20.867	196.608	108.096	31.2292	34.2622	23.4893	65.3193	11.8734	25.8017	48.9039	33.2773	17.1429	56.655	14.29	38.143	26.4092	66.7437	24.7915	17.4197	33.4005	101.516	24.8974	21.6639	22.3487	15.466	86.0954	69.0707	134.584	15.4513	9.95618	15.0825	18.32	19.1318	29.9935	14.0831	17.6626	31.9224	28.2854
O75558	18.0245	31.4821	56.7444	20.192	28.469	39.0168	56.9049	31.3049	25.6555	26.792	29.2038	38.257	28.6589	47.1864	36.248	16.1406	29.2853	39.7922	31.0213	29.4631	21.8554	17.7373	19.7045	18.9906	30.0332	33.507	38.5505	17.6577	19.8777	26.549	41.4917	37.3731	50.0866	96.0371	20.447	36.924	34.7997	42.4697	39.111
O75636	8439.84	13162.5	7824.2	13623.2	7696.97	16559.2	14566.9	17070.3	11749.1	18261.2	8287.41	14304.1	13509.7	8970.19	9895.29	11641.5	9829.38	9184.69	14367.3	9983.84	12730.7	16493	13323.7	12831.5	10165.8	17014.8	11011.9	15982.7	12128.3	14379.2	17154.5	12349.6	8819.54	14101.5	8019.4	10782	12252.6	43274.1	13960.7
O75643	269.618	609.924	167.286	461.733	1120.55	726.732	501.337	118.205	623.809	455.798	841.568	183.508	580.156	106.48	302.286	260.818	285.403	143.619	128.206	313.866	201.76	231.985	336.597	352.462	158.886	738.033	221.632	464.396	1027.1	299.875	250.695	120.927	79.47	52.3629	204.457	331.792	118.046	161.937	79.3185
O75695	33.7786	21.0108	36.1683	22.9752	42.9852	18.3468	37.7625	12.7177	13.6986	38.246	32.047	29.1672	34.3724	49.2996	31.4762	13.7578	19.1146	20.6928	44.5538	46.5856	39.6363	44.418	33.1359	26.0831	47.7665	53.9178	44.4662	24.7981	71.4348	18.1401	48.9924	20.5281	46.6247	52.6107	31.5662	43.6937	38.5499	26.0303	31.1571
O75882	93.273	42.6831	91.3335	68.9167	58.4103	77.1792	112.938	79.1558	62.5784	71.2025	43.5241	84.9001	70.4937	80.1659	79.7234	87.3834	52.2763	76.4643	81.3153	104.366	68.9158	61.1431	59.1705	98.6821	84.7529	70.7993	95.3961	48.0257	39.3643	70.5764	104.681	65.4037	91.0597	117.666	71.0949	86.3214	65.9151	67.5102	98.9241
O75954	61.628	30.3567	80.4498	84.4451	60.83	24.0612	61.1328	50.7989	37.9472	66.9257	82.7341	25.9985	39.3854	83.4743	37.0138	66.9892	51.0758	114.72	104.547	34.1263	102.069	31.3838	61.3056	40.1519	84.7713	53.0078	59.8605	46.5131	37.4386	73.6348	52.7314	51.0979	22.8939	59.7316	54.4293	20.4874	65.938	26.8934	66.4731
O75955	21.2747	42.8976	58.5023	54.4929	71.4145	17.4713	55.1524	24.7068	20.658	39.651	18.2519	21.7188	32.8308	24.6236	33.9929	39.2959	22.7321	26.8205	39.5691	39.2204	47.1059	26.7398	29.8076	32.4564	22.2741	26.3289	46.6501	41.5557	40.7493	18.2504	4.36163	15.2031	16.5762	42.3002	16.4273	11.1166	18.6095	36.5428	20.5512
O94832	82.7239	26.2271	80.4992	43.1122	58.5234	90.8082	26.319	22.6431	9.58413	21.6215	16.7181	40.6612	5.79514	48.5029	47.3528	12.8649	37.4496	58.4139	55.9366	23.04	12.3241	35.5924	58.0501	51.5387	53.9912	64.8574	44.8524	48.8085	37.6885	47.9123	42.1707	44.6195	41.212	18.9812	33.3776	66.3553	42.5705	38.0036	21.0927
O94915	201.513	239.299	169.061	172.745	219.953	156.193	335.472	151.7	342.968	176.589	249.58	277.115	233.223	224.562	202.913	75.0311	307.462	210.175	192.475	285.66	245.522	273.2	165.327	215.117	176.856	240.98	228.373	302.096	257.974	263.35	227.384	283.417	316.075	155.123	274.092	136.746	186.432	146.608	256.572
O95445	8132.31	4990.44	6842.99	3757.97	3419.75	3733.98	5921.6	2824.6	2238.88	5161.46	5593.09	3905.7	5952.77	5108.35	7053.69	5773.3	5110.16	7065.61	7266.14	8756.34	5654.84	4920.89	7788.37	7441.7	8327.48	5238.39	7773.29	5777.41	6579.3	5728.37	5419.9	6349.12	9704.58	4939.79	6773.56	4702.74	7460.07	2911.05	7704.46
O95497	15.3705	82.8314	88.8635	46.38	260.475	15.8177	120.819	38.9233	60.3027	43.1216	27.3258	42.031	36.8633	29.0276	56.8606	93.0103	37.2886	37.9402	26.1256	78.8988	29.1196	15.6375	61.5055	47.0385	257.091	51.2375	47.0615	52.5046	31.3234	22.9541	34.6304	20.5132	124.713	66.9701	10.1546	18.1702	31.8564	60.1791	55.8347
O95810	18.18	27.3694	62.0698	33.6644	28.883	63.5928	27.314	57.7374	5.28575	16.4037	29.9471	52.9832	15.5991	110.193	32.5757	29.5776	132.194	46.1194	69.8891	58.8512	14.6714	59.4038	38.559	48.0754	45.5173	8.10508	22.0751	24.5208	40.6978	31.6258	76.0509	28.0763	32.3087	243.212	33.5025	47.5792	50.7017	160.872	81.2366
O95866	108.901	157.799	163.924	148.419	162.718	62.5421	67.3136	121.711	102.538	97.2636	284.974	107.504	104.792	214.268	113.262	115.615	91.3311	249.246	103.311	61.3992	133.4	181.236	116.531	90.5096	68.8749	112.331	168.13	148.488	380.892	142.637	135.571	63.2083	117.755	319.444	152.029	132.062	210.29	397.451	155.277
P00338	59.5046	31.917	40.1473	26.5604	38.9277	43.3018	42.6079	75.7078	22.7668	49.3161	31.0266	41.9064	37.6084	28.2904	27.6444	59.1039	54.9894	25.1372	46.7763	43.9016	96.3133	34.1327	29.9843	20.2425	29.4075	17.0471	24.3257	25.045	37.1773	25.0505	146.82	18.962	54.6936	103.337	17.5091	19.5931	45.9797	42.7057	55.5014
P00441	80.1963	65.3142	81.2248	82.0362	93.5273	33.5707	86.3532	31.0595	48.3333	46.9702	48.4919	58.7702	34.3162	94.6625	79.4155	66.5661	48.7073	67.9144	46.2873	176.281	75.5568	66.9255	53.0378	47.354	127.256	30.3893	49.6855	118.061	53.7838	43.4811	39.2145	44.3836	60.9834	227.408	37.7242	43.5863	134.147	78.8984	122.875
P00450	363.154	645.054	474.942	331.712	895.397	314.695	1161.54	375.454	311.631	332.727	322.99	380.833	384.352	465.196	347.588	374.544	439.952	367.359	404.361	457.468	284.689	279.339	339.862	339.903	298.869	298.686	355.093	506.843	313.404	328.006	258.712	366.401	321.36	608.115	252.277	285.628	314.385	1088.48	364.196
P00488	249.617	222.57	204.237	286.828	284.816	493.279	265.027	343.373	581.481	373.962	307.702	303.123	639.032	604.426	250.135	296.199	310.208	348.974	308.132	431.367	330.038	190.072	380.337	358.201	342.592	301.477	307.093	513.843	260.43	209.531	293.384	316.344	195.945	513.186	229.467	279.973	278.023	763.247	274.63
P00558	22.5864	21.0582	33.4351	26.6862	24.9683	26.7939	35.8481	22.7957	23.9945	38.1093	23.3119	15.5643	16.1323	33.8843	31.4105	42.2366	17.8995	18.7567	25.7006	12.9072	21.4611	27.7431	20.6995	20.9171	37.7463	20.0124	22.372	25.6754	16.4468	24.2992	2.83136	10.6172	34.8786	114.861	24.5624	28.7663	38.1297	24.3894	38.9905
P00734	2849.44	3074.79	2954.94	3986.31	4189.53	3237.11	3026.89	4321.35	3398.06	3475.98	3205.11	4059.75	4069.85	4956.66	3688.43	5498.5	5546.76	4851.69	5150.47	4257.51	3393.2	2798.36	2995.33	3101.13	3597.54	3143.69	2969.8	4469.67	3240.12	2699.12	3453.57	4316.86	3968.45	4408.41	3770.83	4187.78	3018.54	543.565	5081.06
P00736	19596.2	15883.2	18357.8	16662.2	16133.5	21810.8	17429.5	24819.2	24344.4	21476.4	17055.5	14244.9	13870.5	15122	17311.1	13881.1	20060.8	17543.2	16283.6	16018.4	36031.2	23621.7	15960	15947.4	19814.1	22513.6	22315.5	20283	17541.7	24455.7	22748	22930.9	15084.7	28315.6	25435	21408.4	18763.6	32749.5	16771.9
P00738	29166.6	18637.4	43402.5	94185.6	23174	140105	76118	101558	34199.5	73811.7	21378.5	21046.2	124508	41573.1	34592.1	41352.4	55970.6	7815.43	47929.2	32519.4	50688.5	30931.6	96277	95410.4	50943.7	100440	17643	29875.6	74708	46945.9	70089.3	66733	86248.6	33691.8	38782.2	107615	24868.2	22212.7	50584.4
P00739	19621.3	14740.4	41865.4	11775.1	6945.23	10101.3	16722	27057.6	6590.14	16470.9	12561.5	33829.4	8952.61	14186.6	16015	17499.1	12915.4	23273.9	13591.2	11443.8	8443.37	17567.3	8700.29	8453.92	8649.67	14391.1	13342.7	29112.9	9753.97	14325.4	18124.4	9949.4	10776.4	9363.97	16120	9732.97	9805.32	16621.6	11611.6
P00740	132.841	184.614	232.616	239.836	138.776	309.582	272.656	302.854	112.321	184.049	219.009	214.768	133.499	188.431	269.286	255.662	217.86	344.949	173.841	144.778	440.071	178.65	278.998	244.058	597.632	265.684	529.512	350.46	158.007	461.836	547.058	502.257	507.847	827.628	396.914	613.823	376.251	71.5212	332.186
P00742	43.235	39.8679	31.7604	41.1346	61.5076	128.986	56.4475	33.852	40.4125	44.9137	52.8747	40.5003	47.7051	35.3942	44.0321	45.7852	42.3283	82.3212	40.4691	27.3886	91.3803	56.0729	89.9349	104.013	64.0164	108.127	124.535	130.967	53.4132	104.948	64.8669	119.218	102.419	64.3564	98.6835	131.354	58.1949	23.7749	70.8539
P00746	135.894	76.6222	152.695	109.482	104.935	149.949	166.955	133.788	114.664	153.921	52.0076	125.493	152.162	82.8487	135.951	117.398	125.834	87.7171	136.677	136.416	93.5387	119.471	96.8675	63.6561	164.799	54.2441	68.2042	453.368	35.0557	103.573	141.334	57.4692	118.28	105.347	56.4181	146.261	127.019	141.739	103.541
P00747	471.118	359.036	431.775	464.17	507.297	384.695	937.242	453.149	387.44	576.926	329.476	606.893	458.276	474.091	387.244	378.119	452.854	499.009	522.696	630.928	420.454	435.277	374.846	437.627	443.04	445.235	414.559	440.968	394.519	487.133	437.488	463.092	609.532	763.374	430.605	563.27	338.354	636.44	507.667
P00748	21.1712	19.1159	19.8942	36.4424	32.4625	24.4257	43.0148	22.422	11.0263	14.6942	14.3659	20.211	20.2279	12.5071	30.9251	34.6269	26.5293	23.3248	17.2781	88.6069	18.8669	23.8052	15.8558	12.4665	12.2188	11.982	14.0912	36.5574	12.9455	16.9149	17.7132	26.8637	16.9664	39.7064	15.1411	25.4248	29.0068	25.8903	36.7303
P00751	104.291	112.518	127.596	101.873	314.341	95.6923	416.287	84.1597	77.7665	86.5618	99.5565	88.7436	115.281	73.1619	110.336	130.314	112.149	118.317	98.8788	205.033	83.496	62.8792	105.499	105.433	80.7932	101.125	54.8055	115.25	68.2933	141.867	73.4908	81.6739	103.727	227.444	54.3798	85.715	78.5143	108.966	92.1975
P00915	24.8209	22.2477	32.7522	38.0811	34.734	27.9845	48.6808	28.6012	32.1232	35.5356	23.8259	32.9275	50.8209	26.6201	28.5853	26.1463	30.5475	14.9719	28.3587	27.4511	48.2369	103.669	26.089	28.7732	40.0268	32.1771	12.1654	43.0857	32.9704	16.2811	31.6908	30.0491	49.2051	219.617	26.6369	42.1512	90.0152	40.5837	130.415
P01008	278.915	227.403	209.87	282.734	350.259	299.708	329.151	237.6	190.785	211.225	248.437	284.189	289.496	259.176	295.379	455.637	306.502	391.408	270.789	344.634	344.089	198.718	239.813	201.634	282.74	249.143	294.161	483.965	306.506	263.719	314.255	236.844	232.17	373.31	198.514	246.069	191.295	220.012	275.725
P01009	395.78	380.785	429.278	386.55	855.331	519.527	1951.33	334.368	500.99	295.429	401.898	478.451	330.851	301.983	433.786	407.009	334.355	347.089	429.374	531.448	321.137	307.981	364.272	357.837	411.794	540.592	325.876	431.463	345.219	415.465	408.088	309.804	355.144	548.594	335.397	399.508	295.186	1274.67	324.151
P01011	596.458	564.888	894.07	496.766	1115.92	575.685	1108.23	594.441	572.269	346.825	335.451	1004.57	764.222	574.812	670.344	477.826	904.733	579.359	832.159	755.727	363.709	719.135	532.418	584.245	522.62	568.512	593.938	503.82	633.043	651.773	442.293	593.34	806.446	412.117	585.923	454.646	412.631	1413.2	696.638
P01019	2798.93	1202.83	4322.56	1673.7	607.386	1160.1	1380.41	2522.88	834.224	791.904	1131.74	3221.88	1159.99	1292.73	2750.99	973.005	1142.75	2555.76	1763.32	1295.25	1136.08	2033.19	1169.1	1085.34	856.823	1121.11	1157.99	2278.05	1064.59	1729.42	2031.57	1066.92	1267.84	1877.61	1855.97	800.273	1088.72	2420.24	1096.13
P01023	97492	112666	90476.9	96122.4	164652	272425	91699.3	216730	206361	126802	168565	193710	127202	249784	113902	189788	153446	115938	156565	116293	195456	165175	123017	124785	191580	205511	142138	116300	139975	215440	243949	182136	107834	192739	153325	248318	186532	222204	99255.3
P01024	6924.53	7339.43	8360.66	6933.54	10351.7	5036.81	11015.8	7541.22	6056.02	7007.35	7564.61	7692.26	6454.35	5502.56	7594.23	4770.03	5839.3	7172.59	8437.42	6432.28	4483.58	8504.64	6349.45	6164.16	6844.43	4338.66	4155.85	5378.79	4604.9	4405.88	4117.57	6020.33	7475.1	6865.28	3528.69	6561.93	6607.3	3765.5	5127.66
P01031	357.128	791.945	783.642	616.473	1122.33	508.565	770.066	899.654	768.347	539.256	416.307	781.712	439.053	708.617	469.854	813.01	833.327	727.359	646.713	540.649	312.202	302.832	388.457	401.901	435.593	362.988	420.499	525.343	330.992	342.654	352.637	448.019	413.51	311.037	277.395	373.009	293.181	330.597	339.953
P01042	844.984	1076.44	1259.8	903.753	1195.83	773.587	887.995	526.97	665.286	663.242	649.318	648.651	794.403	753.873	719.871	824.461	566.606	930.097	623.571	746.958	1115.88	1139.83	953.224	1022.66	844.132	694.495	777.992	1026.57	879.153	587.486	625.602	694.999	1011.03	1400.25	693.222	516.772	672.372	520.456	1031.04
P01130	954.901	488.073	558.991	323.857	827.279	522.231	807.041	600.876	244.228	575.826	739.076	520.635	788.491	634.917	880.849	455.231	536.609	685.571	922.933	725.568	546.844	858.708	675.893	724.232	738.604	486.178	550.968	498.917	455.036	414.739	357.477	630.585	925.663	506.964	616.548	326.5	728.57	110.613	1086.53
P01137	161.824	193.243	186.275	193.505	227.499	135.658	190.872	241.347	186.062	195.691	223.735	257.988	251.941	272.606	210.319	225.154	286.668	438.37	246.483	218.441	199.195	167.445	223.789	195.754	192.521	197.22	273.422	241.626	316.844	260.792	163.44	270.878	217.666	291.907	232.992	165.915	200.791	96.1259	381.226
P01344	10.3701	27.509	11.1495	23.8864	17.9398	20.6685	54.7984	42.631	21.3921	13.1877	22.7957	31.5405	65.966	42.6681	23.2432	14.8863	35.2908	39.9718	28.9621	56.9248	29.7238	21.7355	31.9328	47.4631	33.4451	29.6879	14.0558	29.2395	34.7554	39.8323	19.7248	48.44	33.9684	16.2799	44.5812	43.8202	20.5598	82.2458	44.4145
P01591	76634.1	53575.2	89853	48502.7	43045.6	53306.6	56304.4	78872.7	91173	60249.4	34768.5	72359.1	62220.6	42550.3	64189.9	39827	64422.9	38039	68970.5	86245.4	53362.6	86624.7	40508.5	38530.2	54585.1	68421.9	36054.2	55572.3	38421	47986.4	68704.4	44494.2	49243	42256	68417.8	45326.4	47939.7	75711	38744.3
P01593;P01594	1440.68	380.347	899.828	408.774	347.975	270.361	364.426	3114.53	2035.37	839.988	806.113	1252.17	1068.99	1443.35	1379.62	1329.39	771.149	183.391	1190.42	1545.99	1102.12	1563.8	845.242	1122.33	1758.26	1021.7	684.125	544.791	573.362	550.664	1544.74	592.811	363.746	821.488	1639.83	805.774	1298.46	4659.94	658.814
P01597;P04432	579.427	545.223	491.364	649.862	677.015	633.438	407.519	788.64	491.298	768.884	396.116	704.808	650.044	481.002	878.648	584.018	605.216	714.981	453.386	1351.6	560.716	670.551	797.727	771.595	660.119	507.473	317.152	3919.43	530.044	690.796	704.215	434.351	533.224	486.222	659.561	432.395	328.498	1282.73	611.76
P01599	825.703	557.053	850.779	924.068	490.854	519.118	600.014	733.997	425.034	683.461	311.532	360.18	968.758	446.282	696.828	310.579	1009.12	338.192	537.213	483.691	1087.07	248.88	426.969	245.552	837.725	572.037	344.283	530.746	377.47	496.651	688.813	516.755	467.942	453.157	341.465	89.4427	437.871	1344.05	525.907
P01601	193.252	101.846	221.151	166.64	233.455	266.612	155.735	499.974	139.117	234.344	129.273	285.88	445.092	185.197	146.927	388.868	406.94	213.667	489.471	276.076	210.318	158.256	139.898	92.6246	407.704	234.112	54.9083	184.331	149.906	171.208	326.764	105.543	62.4235	541.452	200.304	94.7594	113.397	435.647	210.756
P01602	191.914	157.442	133.397	150.48	212.975	185.274	148.696	236.962	151.301	206.475	108.579	352.485	324.414	148.036	242.161	240.822	193.746	143.188	269.405	223.687	199.052	263.475	132.45	127.24	218.59	124.591	74.7186	184.098	171.995	195.527	469.948	140.992	153.294	153.315	201.759	144.4	228.858	399.847	226.899
P01619	8295.13	7438.11	5057.02	6429.65	5393.52	6112.15	6580.58	10546.5	5471.73	6137.77	4307.75	9816.45	7896.52	6096.7	8900.67	7152.36	8941.93	4729.66	5290.44	10067.2	5698.94	9958.32	3791.76	4579.75	7216.4	6588.59	3340.59	7288.96	8715.17	5477.35	7999.79	4330.14	5528.99	4189.57	9492.18	3791.25	3203.26	17081.3	6356.4
P01624	1552.02	1206.24	2258.58	1236.85	1020.98	1388.34	2780.92	3680.35	854.314	1439.98	1127.38	2921.68	1414.09	518.937	873.847	2916.32	1324.16	835.604	1483.27	1372.28	2190.93	2361.46	455.51	719.038	961.843	1417.23	680.121	1013.28	1318.31	1101.33	4995.09	769.787	431.808	895.806	2021.38	1108.65	771.889	1972.81	995.549
P01700	15226	4669.52	5319.31	3880.57	6123.9	4162.68	3272.76	7769.69	8343.57	5056.66	3070.04	8050.26	4244.27	4874.58	4891.58	3981.59	6021.09	3005.87	5214.49	4250.88	4527.06	9448.94	1503.09	2429.65	3906.67	2838.83	1786.2	7247.62	4087.72	3404.04	4235.41	1757.44	2098.93	3007.23	7235.08	3620.94	6148.57	10827.2	5545.14
P01701	7439.49	5392.37	6286.62	4741.24	5791.92	3928.3	5034.94	8010.18	8495.26	9205.18	3598.74	10150.3	7526.53	5690.48	9014.19	4243.33	6562.2	4134.26	11123	9379.61	17393	11188.4	4408.47	4225.72	3553.18	3796.03	1133.57	6408.85	3542.42	4633.35	8542.8	3443.21	4791.32	4829.73	9156.43	2771.42	4680.02	5017.53	5530.63
P01703	261.088	166.257	435.175	445.393	327.608	220.304	123.715	499.585	192.275	499.916	179.069	229.197	251.389	208.758	393.781	671.069	321.682	262.374	440.466	245.137	459.274	506.687	373.5	362.307	310.458	141.634	110.261	277.731	242.424	224.477	619.81	207.703	347.676	214.464	239.238	134.244	280.797	1297.33	325.227
P01704	88.5034	113.45	176.7	36.1826	59.3333	41.9536	123.531	40.9455	31.129	15.7544	21.8602	10.3962	16.2998	5.50153	292.714	27.9432	43.9293	14.6448	28.6355	247.992	168.402	444.913	47.9558	122.701	161.018	173.921	154.847	677.727	13.8684	187.909	60.9417	53.8873	164.004	134.012	12.0832	121.607	194.547	37.804	8.23222
P01705	4247.59	5758.73	4872.35	557.699	981.081	3544.11	2776.56	6413.63	3180.31	6.03488	1975.62	3038.21	547.054	240.699	5163.45	476.383	289.842	5126.14	2756.01	381.021	1879.9	3268.4	4127.05	2778.33	1028.6	1661.02	2552.54	40.6022	3221.93	2401.1	492.296	1008.37	2125.4	7529.36	3615.02	771.781	62.0233	1668.29	2819.92
P01709	37.4964	65.1308	95.7054	46.0733	41.968	64.5512	83.6889	82.2777	59.7991	126.343	52.2749	130.606	99.1375	77.705	99.4041	105.664	72.5553	36.6626	67.8101	68.4666	71.4352	71.9069	34.8909	29.5646	59.9754	25.3761	43.1606	122.844	59.664	128.497	96.9424	30.369	58.1925	75.5892	129.158	73.6787	38.7683	96.6753	57.0819
P01714	2277.9	1677.21	797.24	2215.38	1901.77	1818.22	3110.24	2789.77	3413.85	2050.48	975.464	2120.25	1366.33	1949.48	2233.5	3928.94	3273.26	1523.48	4789.18	2835.45	1739.15	1646.62	1791.78	1404.63	1818.29	1235.16	2260.69	3834.61	1022.26	1232.43	3051.23	965.172	2205.82	1667.59	1460	1484.18	1155.11	3666	1901.86
P01715	516.469	740.199	380.909	386.722	547.425	1029.91	532.536	1905.9	564.136	951.542	308.545	800.297	674.941	505.248	674.695	1192.9	1135.97	688.234	304.344	1278.22	665.253	962.589	554.396	617.495	842.217	695.458	393.931	1416.25	593.991	983.636	1809.04	442.179	845.744	347.732	449.342	594.378	794.878	795.238	830.346
P01717	6367.54	2368.86	1373.23	1972.94	1788.31	1848.74	1365.28	2119.75	1703.11	2584.36	734.367	1766.75	1397.19	1461.63	2293.76	2667.4	1806.98	1468.2	2229.35	2589.43	1749.15	2661.32	1206.09	1124.63	1365.44	1310.16	436.769	1980.96	848.49	1298.24	2937.84	948.491	938.204	1358.65	1161.45	650.561	1000.19	2645.68	1426.03
P01718	1219.19	64.8041	22.1622	111.689	18.0986	62.4588	46.5417	253.05	30.0246	97.0515	20.4724	83.5592	27.2394	30.0688	464.128	48.5141	62.7721	69.636	34.7285	53.6458	43.5789	142.731	59.0718	38.8267	70.7554	15.5207	5.19163	64.5755	26.8782	55.9974	68.3871	39.4407	24.4279	269.798	23.3406	49.9259	17.0595	88.8424	78.4202
P01721	443.735	391.828	126.918	453.158	1007.06	298.243	390.688	886.105	1075.47	1262.66	251.475	362.898	314.513	343.16	688.57	1095.57	523.513	281.654	476.581	733.582	412.109	525.634	262.967	174.344	231.321	162.468	78.0824	698.211	573.359	701.702	921.836	285.714	424.399	315.195	557.234	232.579	353.355	952.996	210.097
P01766	1485.5	569.092	1600.89	867.894	562.077	662.224	834.115	2613.56	1996.16	2266.94	680.852	2557.48	1289.91	550.035	1969.22	1680.28	1204.86	760.714	679.425	1752.26	898.68	946.12	966.065	537.595	844.564	599.33	497.668	834.103	848.064	1265.56	1513.89	721.012	693.316	1069.4	1721.25	357.897	1350.87	2638.69	1078.56
P01767	170.498	188.661	160.601	98.6918	81.9172	133.389	191.237	208.966	79.7362	362.641	63.1946	93.6094	205.591	118.02	242.228	186.8	90.0882	224.688	144.248	115.087	130.272	118.189	251.901	107.707	199.665	51.6764	70.2482	360.577	236.979	93.3734	221.4	124.75	196.905	223.739	144.971	109.944	227.812	199.806	217.9
P01768;P0DP03	17884.2	13137.3	24338.2	7675.67	9709.56	10374.2	12811.6	14921.2	14380.5	11992.8	8428.52	14475.7	14531.5	9121.87	16558.3	12739.6	12556.8	9774.59	11821.7	17670.8	11353.2	16220.6	8884.44	8865.17	12439.1	7897.99	7784.01	14188.8	9377.38	16216.5	11682.2	8868.13	7739.02	9319.69	18702.8	6862.09	11550.2	19426.2	10428.3
P01772	75.2083	294.162	90.4936	14.4283	63.4356	67.6124	116.663	217.083	62.3022	96.75	60.7924	29.4633	143.051	66.2054	126.509	103.899	59.1877	139.543	117.312	59.759	91.3991	68.6658	71.0671	76.5338	58.2899	30.0449	16.1307	111.749	63.8958	187.979	86.9494	35.0559	60.3326	66.6973	110.308	72.8735	81.8802	73.0754	61.8476
P01780	27943.7	24413	19927.2	22469.3	21486.7	21102.5	13949.6	28735	23468.3	27376	16145.8	34941.6	23956.2	16460.3	34565.1	31375.6	37376.3	21965	20668	38515.9	16220	33442.2	17964.2	18052.9	28444.1	20581.7	13578.9	26471.3	21091.6	29997.1	21797.8	22519.7	25048.1	23218	33396.5	14550.6	24574.3	55923.9	31085
P01782	5817.45	4516.12	16689.6	3979.48	2748.34	5045.77	4357.38	8044.88	2990.02	5735.6	2523.95	4009.45	4951.55	1316.38	4075.57	4352.79	4213.01	1895.95	2175.23	4109.32	3611.98	4427.6	3062.62	2585.7	1999.46	3309.74	2437.21	3735.37	1724.11	3827.28	3811.68	1606.53	2991.52	3625.77	5187.38	1654.99	2504.85	6241.85	3295.75
P01817	145.11	119.436	73.645	115.577	154.038	86.2326	31.0693	78.9449	64.9933	102.965	66.1898	177.301	51.6146	36.5294	31.2515	44.4561	155.842	36.3909	24.4317	172.277	41.1097	119.93	70.0204	84.6643	42.0001	34.3822	89.6043	371.821	90.679	200.017	52.5219	121.889	110.662	41.3896	136.747	91.106	41.0013	83.0828	77.4551
P01833	7184.59	1931.72	2633.31	1800.05	7390.06	2980.53	1502.2	2590.27	2377.34	1784.29	2290.68	2252.08	2313.64	1639.34	1221.72	2060.84	2181.83	2073.91	1890.73	1788	1169.27	1331.05	1219.34	1267.22	2077.76	3654.67	818.969	1569.19	1324.92	1766.19	1632.11	2542.63	1682.94	1448.57	1409.1	1542.74	1820.62	4588.21	1523.83
P01834	3361.57	1811.78	3983.86	2521.85	2167.93	2630.2	1043.59	4454.97	3927.58	2716.83	1589.19	2419.82	2114.1	1099.25	2783.85	2138.64	1822.5	1676.88	2369.36	3425.37	2576.99	1927.23	2162.68	1723.85	2995.98	2354.77	1439.11	1143.57	1119.54	2163.93	7032.31	1397.57	1782.29	2447.47	2468.12	2227.07	2752.62	6559.93	2251.95
P01854	18.1748	8.05077	6.79769	85.0337	28.0803	12.6176	17.1883	23.0616	41.6585	65.9969	15.9725	51.3549	32.7853	55.4374	18.1312	13.5654	41.1142	32.1432	9.2724	45.6638	37.5866	16.7013	86.7936	112.305	68.6463	15.2836	166.047	21.2159	11.0027	11.1411	28.0824	63.2966	12.4739	6.52429	38.2856	267.481	24.9866	19.2113	65.6148
P01859	1824.38	5724.87	5305.48	5438.17	5312.45	3872.03	5707.33	5723.66	3945.14	3403.54	3589.35	2933	2900.45	4695.09	3509.57	3337.58	3869.81	3862.05	2274.1	2137.92	2882.28	2999.58	4355.9	4167.28	2427.09	4489.87	1877.26	2501.97	2605.56	3424.16	4902.7	4111	2872.9	3272.29	2531.19	2057.18	2561.86	5909.9	2186.14
P01860	906.518	336.755	409.456	2295.19	379.922	1100.09	984.398	1189.53	1003.94	1463.71	1720.04	1768.57	1199.3	788.023	662.521	1195.12	460.982	346.576	483.925	1710.02	1247.9	438.554	550.461	524.503	466.464	1019.92	1511.79	307.264	566.929	1904.45	898.506	1181.79	2277.16	650.23	1212.72	532.581	422.467	1297.84	350.564
P01861	91.923	74.9814	151.074	178.506	117.889	165.548	239.652	152.034	165.453	98.8162	131.682	99.0244	54.683	51.5824	93.6273	85.1571	84.1378	121.599	68.185	87.7299	78.4406	263.54	129.623	125.275	164.451	96.9771	95.164	149.255	46.7663	97.3307	273.318	147.294	98.2251	189.204	78.182	405.6	70.7132	130.585	82.1741
P01871	115784	85470.4	159365	86196.1	85633.8	103076	86672	123171	140211	90157.3	69409.9	134468	111898	91821.8	101018	76679.7	120662	71588.9	89600.8	130656	70885.3	138292	61005.5	64192.8	90066	120287	69313.9	120440	77237.9	88365.8	93317.2	72056	78250.5	68086.3	111979	77267.6	83476.4	148206	70642.6
P01876	13721.6	35226.4	15197.5	30226.3	33566.5	38215	26627	50490.2	40994.9	21597.3	40802.3	29522.9	21766.2	24687.2	26594.3	33827.8	24204.9	29590.2	32733.4	28804.9	24743.9	16975.3	20350.9	19149.1	32812.5	21627.4	15847.6	32987.9	22278.6	31626	35330	16504.1	22027.8	29510.6	26576.7	37046	23499	41621.9	21236.4
P01877	28223.6	54888.5	30130.4	38179.4	48719	56313.9	39450.4	60081.4	46127.1	28028.3	59205.3	44398.6	35837.3	29405.9	41720.8	32904.4	28910.3	38657	37096.9	39162.2	34635.5	27607.3	25571	27390.4	53676.6	35288.9	25319.8	33331.1	31880.1	49719.1	46922.6	29394.3	29506.7	24680.8	31630.5	30541.4	37562.1	76563.9	25952.3
P01889	264.721	224.091	221.836	164.883	321.857	106.608	141.233	139.663	80.0769	131.007	250.289	104.323	164.47	147.845	145.28	149.035	176.864	100.263	97.8636	133.198	226.056	319.501	166.794	193.707	123.279	112.318	95.155	268.767	392.085	107.428	55.4621	128.874	157.803	273.554	225.92	152.912	293.851	476.427	249.445
P02042	195.745	259.913	162.205	398.986	362.628	1691.29	939.236	903.801	402.109	789.734	237.038	279.62	1042.26	1085.08	339.619	950.367	547.694	79.3513	322.069	840.837	692.626	943.59	761.43	573.739	1146.34	958.071	171.003	146.643	420.807	166.103	800.745	724.065	805.771	1727.18	350.949	748.571	915.273	268.609	958.287
P02452	793.791	911.959	458.805	914.511	550.418	798.214	941.086	1230.98	2670.05	652.967	2536.05	821.128	487.723	727.511	537.971	1483.62	523.862	537.454	532.554	694.651	809.009	1289.34	536.297	505.569	1106.79	1013.03	1014.24	400.484	843.286	1002.46	1383.73	452.729	875.326	669.472	584.923	1675.2	1010.54	811.843	430.041
P02458	227.253	188.625	91.6489	181.086	106.042	175.544	141.109	358.434	173.709	235.171	173.884	269.277	159.405	221.398	248.098	264.359	102.895	99.9839	228.794	107.988	294.005	85.84	200.72	124.126	167.068	237.636	231.983	76.1686	235.942	218.257	361.219	149.238	113.05	209.731	193.389	144.041	210.971	59.3312	94.5114
P02461	96.1394	133.349	98.1862	126.365	105.523	146.887	107.841	125.043	252.224	89.932	293.998	91.6785	84.7897	73.9087	79.0285	158.172	75.0844	89.6204	68.0998	98.6317	103.716	156.3	77.0068	74.4482	119.177	94.5843	100.492	68.4913	86.2445	99.319	143.31	61.6618	68.374	115.713	78.2365	88.1584	133.97	115.114	61.3298
P02462	70.968	143.618	90.0766	181.956	118.625	187.526	141.523	218.538	273.071	122.5	199.093	128.963	95.7307	131.062	98.7524	178.019	140.603	146.282	126.036	101.991	99.0662	216.342	80.0946	59.1172	69.6498	106.063	112.427	78.5966	109.933	151.48	208.629	134.91	86.8834	210.648	136.803	259.862	111.776	197.483	90.2891
P02533;P02533	456.375	315.077	663.853	323.395	100.879	83.2795	87.1254	97.6497	174.014	283.835	227.716	122.294	615.708	75.7719	628.335	84.1517	57.9137	248.604	809.56	208.173	481.646	101.677	360.64	273.122	344.789	160.871	443.17	114.395	232.687	97.3957	120.636	246.457	177.163	94.9616	139.766	91.1095	232.029	145.09	141.943
P02538;P02538	1582.52	1152.96	2299.45	1054.13	241.809	143.913	263.011	599.48	618.713	1128.02	861.297	326.422	2149.56	264.262	2117.04	265.748	194.655	923.858	2621.54	691.872	1601.98	453.414	1148.86	1072.9	1224.27	621.288	1847.71	345.841	814.061	150.172	326.304	1099.41	585.706	232.242	847.059	238.183	803.416	436.615	478.556
P02549	73.3553	66.0571	85.6371	37.0661	100.309	111.577	64.513	56.5012	53.5817	71.0766	47.6132	76.5703	84.3841	82.1982	53.5731	54.0867	59.9191	47.0486	60.5871	130.556	89.9157	56.1338	75.0964	69.3335	73.0033	75.1874	35.3983	43.9375	52.5473	64.5714	78.401	50.2827	68.0337	814.959	53.5359	52.8709	39.4236	53.7944	52.5533
P02647	54612.6	41093.4	59290.4	45534	26743.6	53712.4	79281.6	50419.1	46862.6	54510.6	41975.4	73033.9	49880.2	47243.3	65021.8	44251.5	93114.3	84981.1	69483	45529.7	59072.7	44367.1	43703	42344.4	54562.1	60124.9	63137.6	84393	85934.9	63827.9	68732	82699.7	53922.1	45951.2	57202.1	68357.5	63480.4	70883.6	47891.3
P02649	91082.6	68067.1	60817.3	51508.2	56353.2	105499	71919.6	35465.5	69621.9	67213.3	64701.5	51282.1	66176.7	52721.3	67712.8	62596.3	73141.8	48322.5	137410	111297	84512.7	112654	118600	113420	146128	96418.2	108519	93449.9	69058.6	88529.9	69912.8	94649.9	83392.1	68774.9	90891.6	83945	188309	37385.2	86284.9
P02652	602.675	470.557	603.534	550.292	515.304	650.16	1426.8	356.46	1073.78	502.379	473.964	739.895	396.88	559.958	547.925	546.696	832.298	534.063	842.137	870.375	664.232	537.732	528.961	663.905	444.55	496.73	583.388	448.569	869.94	602.172	425.343	701.934	517.324	336.8	420.01	617.58	590.506	429.728	730.294
P02654	28324.8	15881	34627	14073.8	7877.94	22025.9	37055.2	4472.12	9274.74	19788.4	22886.6	7527.6	15115.3	12206.9	26667.5	11795	21182.8	10253.7	46983.7	67809	25113.3	27557.6	50871.2	53371.2	81461.7	43664.1	66243.9	44475.8	26045.5	64593	14488.8	40584.4	60270.4	34690.4	23849.1	31305.6	103496	9660.94	51432.6
P02655	164597	78466.7	186966	46196.1	25655.3	56741.2	84011	11706.5	19196.3	63947.4	55636.7	19619.6	54911	36868.2	93291.8	30793.6	40689.2	19142.4	142574	169536	119875	121592	231862	235802	226254	101612	116886	102876	75699.9	78504.2	65945.5	84065.8	138846	111489	76549.7	62395.2	184944	27497.4	192705
P02656	77621.2	63483.5	81063.6	32074.2	12816.4	33264	68710.3	6506.13	11105	37428.9	39825.4	13355	29796.6	25145.1	65461.9	27649.9	35810.1	16874.7	97458.6	206502	72472.6	85766.9	121899	126981	152690	55831.5	154874	68787	40201.6	86834.4	42397.8	86102.5	116702	68311.3	57625.6	43371.8	187771	14107.3	155576
P02671	1208.29	841.58	770.593	1185.18	2597.97	3143.51	928.834	1289.48	3277.29	1476.67	2066.86	1461.35	2246.32	1036.57	682.291	1313.69	1077.09	1586.52	1261.18	1329.76	1752.81	1225.9	1903.41	1921.5	1313.14	2015.31	1357.42	1461.81	1405.3	1385.45	3595.45	2718.26	1324.87	1748.93	1376.32	2229.58	1452.18	116573	1481.27
P02675	1743.91	1844.43	1108.76	2028.01	5481.62	5540.36	1247.73	2154.65	4623.74	3272.3	3265.06	2495.59	3033.17	1167.38	1172.89	3212.86	2063.62	2178.95	1690.3	2190.53	2300.29	2251.88	3543.55	3574.83	1787.18	2953.85	3779.85	1722.6	2821.17	1972.48	9577.45	5381.26	2015.83	2857.45	3239.24	3285.22	3790.61	159687	2491.35
P02679	1938.22	2149.26	1205.98	2351.68	6748.49	6988.92	1277.78	2622.67	5988.25	3710.2	3797.82	2881.63	3736.72	1556.23	1344.8	3363.05	2419.56	2835.25	1716.64	2514.71	2775.59	2587.4	4101.49	4136.67	1850.88	3710.1	4259.33	3105.97	3210.53	2128.65	10433	5890.42	2492.06	3061.94	4033.45	4464.39	3903.42	207971	2367.02
P02730	409.464	553.083	553.654	470.587	628.82	1142.8	703.617	355.098	376.589	214.34	468.378	177.269	81.8769	448.536	411.898	428.054	397.411	325.881	226.381	1305.13	483.112	350.071	591.143	639.766	451.487	638.56	465.068	752.298	537.934	166.04	229.842	151.796	476.147	7992.04	351.215	595.183	657.564	335.148	805.283
P02743	605.974	515.851	782.365	432.245	332.868	220.58	547.143	255.957	158.033	388.507	228.894	286.492	291.152	221.278	430.07	349.631	232.41	294.625	287.29	447.583	334.844	302.809	393.78	400.448	696.393	271.891	296.971	244.564	260.125	199.945	358.81	238.598	373.236	460.011	226.197	221.015	270.435	297.563	398.31
P02745	10716.1	10789.1	11219.7	12613.4	9379.44	14522.5	9194.71	14980.1	18851.2	12779.3	12033.9	8796.67	13086.2	10992	11559.1	11242.6	12130.7	13814.2	12781	11051.8	17713.6	14676	10202	10713.3	12277.7	13549.2	14866.7	12673	12047.1	15726.6	16491.8	14137.2	12232.7	14171.2	15412.6	16428.4	12864.7	13359.8	11155.2
P02746	22439.3	26233.5	23072.2	22760.7	23034.3	36306.2	27317.9	41553.3	38648.6	28575	30335.8	23445.1	21596.5	27115.4	21492.2	29752.9	28794.6	27507.6	28018.8	19986	48081	33154.7	22632.4	23189	30257.1	28053.5	33391.4	27438.6	28225.2	39271.1	42785.5	33076.2	25693.3	33366.6	34147.4	31825.2	24776.7	21288.7	23480.9
P02747	38148.5	34974.6	31834.9	42056.8	41758.1	52725.9	37868.7	49429.9	41450.8	37712.2	42591.4	30208.8	40855.4	40310.4	35749.3	43593.9	43093.7	45089.3	34565.8	36807.7	60404.7	48074.9	30759.7	29084.6	43114.1	48796.1	43177	42099.6	43052.1	53033.1	59234.8	50883.1	41372.6	43999.7	45080.9	49087.1	37261.1	40906.2	32785.6
P02748	270.656	643.112	719.924	620.538	1062.84	463.703	604.723	586.832	655.1	447.838	387.734	608.815	568.831	660.796	394.895	819.217	747.523	680.431	700.936	454.141	280.727	329.446	350.714	374.728	386.245	320.457	397.961	380.144	299.321	260.532	304.364	415.04	262.656	202.048	250.999	233.974	232.507	316.028	256.491
P02749	604.398	354.277	299.988	474.633	598.304	292.253	447.616	223.288	313.115	527.222	368.441	408.723	373.746	345.172	109.046	437.976	355.441	298.089	645.916	735.158	470.999	306.252	457.286	523.198	594.424	162.7	430.454	338.228	283.667	327.667	272.384	387.18	536.5	780.387	382.025	447.693	586.732	513.139	741.636
P02751	22061.3	22585.3	14591.7	20231.8	16648.8	20413.4	15222.2	21345	23583.2	33557.8	29914.6	20915.4	28391.1	21487.4	24365.2	23228.8	16901.2	30282.6	21738.1	22780.7	22121.2	7919.16	19811.3	19410.8	20201.8	17814.4	18751.4	27560.6	22496.1	24646.7	25139.4	39370.5	10900.2	14110.1	9228.98	12747.4	11536.9	22202.8	12925.7
P02753	16.8863	23.8403	22.9345	11.2818	14.5547	39.5717	72.6999	19.9206	17.1398	12.4472	14.549	17.1398	24.9878	21.5886	26.0501	25.2866	28.3411	16.2211	24.7561	20.9442	22.3706	12.1543	19.7354	10.9107	21.0177	23.9898	16.3377	14.3411	23.2542	13.7111	22.0121	21.2591	19.175	39.713	14.1691	27.9999	13.839	17.5169	9.3468
P02760	1063.21	846.059	934.508	1078.99	720.515	955.157	1057.95	1204.7	963.424	858.298	1067.64	1074.7	951.999	844.938	1081.77	1010.49	958.494	835.158	1099.18	1175.01	1035.5	877.726	934.199	869.714	1238.28	905.547	788.918	907.016	727.048	920.136	1543.39	730.92	844.75	987.27	702.207	790.328	826.939	1405.76	1030.26
P02763	143.501	130.075	164.896	100.18	464.519	115.048	478.468	82.4017	56.2811	127.13	86.7795	76.0213	81.285	69.0604	151.066	137.143	127.247	218.585	151.555	221.015	158.643	163.731	201.523	176.482	145.358	112.658	69.1213	144.357	179.778	169.92	68.24	180.627	148.743	395.325	57.4203	103.99	151.224	117.48	149.25
P02765	350.185	259.011	340.43	244.592	491.282	231.898	969.809	120.329	191.063	256.861	314.361	186.164	289.967	438.027	314.863	263.086	177.643	360.646	415.81	407.775	340.955	256.017	374.369	286.171	488.841	273.593	176.272	348.319	161.9	191.443	162.696	199.908	244.121	427.038	172.809	174.672	288.637	257.291	261.839
P02766	874.057	638.436	697.333	677.462	362.223	513.291	1204.15	550.723	360.719	750.378	480.537	746.051	568.702	628.303	720.995	565.994	821.34	654.362	903.848	765.816	635.113	441.386	591.101	536.619	517.543	453.762	502.393	698.48	582.062	713.049	413.288	519.267	914.962	938.406	662.409	575.438	651.071	683.44	1135.65
P02768;P02768	18177.1	14268.6	15192.1	11862.6	29020.7	10406.2	46511.9	10739.5	9206.08	9336.73	10149.6	10154	7784.79	8314.99	15585.2	15608.6	13036.5	9077.59	17386.2	38752.8	7468.13	11982.2	14660.5	14315.7	11205	11424.1	6155.06	10818	8021.23	7937.14	8244.33	9978.11	14581.4	25939.8	8327.88	9044.74	14998.1	13809	13982.7
P02774	201.769	151.258	195.576	128.218	329.083	94.1319	639.256	99.9444	89.645	123.188	138.089	140.764	116.788	124.799	167.383	142.115	143.816	133.873	199.24	350.194	82.5342	188.399	133.918	153.772	127.46	124.763	79.6523	109.612	96.9091	112.947	69.9106	130.213	174.06	369.331	95.7567	96.3271	127.847	159.866	219.885
P02775	189.579	172.425	199.511	115.23	149.963	88.6451	194.317	160.461	118.585	123.36	126.372	209.857	175.205	215.185	173.874	124.93	163.873	154	191.515	151.478	201.836	104.324	146.774	120.639	156.256	85.4544	180.331	225.641	206.522	163.767	134.391	144.404	159.509	266.494	123.958	135.034	147.757	203.097	166.564
P02776	2307.78	3399.88	3352.32	2538.39	5737.64	2099.13	4516.29	4867.1	3578.95	2697.23	1997.91	2832.96	2897.91	3141.13	3594.88	2383.11	2572.07	2186.21	6938.56	4284.66	2635.76	2541.72	2325.93	2785.5	3710.97	3295.51	3030.16	5117.09	5012.66	2923.87	3753.34	2229.47	3571.72	4007.22	2574.93	4664.37	3173.49	2509.53	4547.18
P02786	608.962	972.258	711.719	1203.37	1132.25	336.235	1527.55	830.735	758.659	400.177	674.255	459.984	234.445	417.744	679.821	586.307	476.436	541.942	376.521	960.78	665.811	2059.7	796.397	817.13	695.507	383.888	475.646	1053.54	588.921	499.698	523.364	412.031	487.544	1233.96	456.292	627.383	452.589	4016.49	507.82
P02787	1403.23	1339.41	1560.56	1500.9	2371.42	879.907	5384.52	1355.98	1126.27	920.011	1044.07	883.993	735.954	846.973	1379.42	1152.9	1204.58	906.847	1589.61	3254.96	966.779	2031.6	1494.88	1493.63	1112.58	958.731	760.206	1328.96	840.79	767.362	806.657	1147.46	1332.53	3328.18	923.954	918.718	1307.65	3183.59	1628.01
P02790	848.973	682.05	725.762	699.632	1773.5	627.668	3644.39	541.294	450.303	436.554	609.67	538.053	581.125	503.096	881.951	701.247	626.101	558.174	814.842	1424.18	495.144	623.119	818.167	847.211	776.661	514.518	414.247	629.771	444.34	405.887	393.81	561.868	743.335	2302.9	452.371	542.318	695.561	1063.58	978.885
P02795;P04732;P13640;P67983;P80297;Q8N339	13.4031	10.0723	14.2769	4.88785	27.2552	6.40711	5.55618	32.0271	10.833	6.55417	10.1028	25.1847	7.47383	72.5819	12.8971	17.4383	9.46856	21.2703	8.23879	31.9277	10.4027	9.95236	15.2382	15.2382	12.8363	8.17974	12.8628	9.34335	9.10192	5.45722	41.2671	29.1249	11.8463	24.5884	8.87275	32.1424	5.28631	28.2926	21.2937
P03951	50.7218	65.2011	76.4414	81.333	89.948	44.9006	46.1103	67.5391	47.901	46.5355	40.3843	39.8165	68.4133	49.504	86.3776	85.9679	52.3099	75.017	32.1103	53.7046	128.107	94.4617	84.2048	76.731	62.1759	39.0014	52.969	91.4993	65.5494	71.7732	84.1532	57.3578	84.7669	317.004	75.6641	71.029	74.1733	37.6951	47.2075
P03952	1626.15	2501.8	3135.11	8233.09	1690.52	3319.41	2067.24	3650.42	2614.89	2076.28	2437.12	4687.55	1344.21	2338.94	3793.69	2230.59	6558.13	3982.42	3063.62	1374.25	1898.17	1912.66	2540.43	2608.14	3325.44	3376.18	3465.82	4514.84	3019.39	3353.43	4771.02	4393.27	2868.91	5398.32	3217.67	4579.05	1824.62	306.036	5820.83
P04003	90308.4	81753.5	95033.3	103024	82287.1	71161	73494.6	66005.7	66249.9	81513.7	47091.3	47254	67785.8	60701.1	84366	61236.2	68801.8	77697.8	87022.6	88343.8	116121	92801.4	99487.1	104592	90747.4	78538.2	101677	83497.1	70982.3	94406.3	99930.4	85690	91729	80988.7	97291.9	64937.6	70307.3	59261.8	95255.2
P04004	10482	12324.3	13945.8	15581.8	18987.7	11075.8	13040.7	14322.8	10010.8	16016.5	12216	16184.4	16821.6	18926.9	17139.9	22839.2	21195.2	24101	21258.7	17587.5	11161.9	6224.68	9010.72	8300.84	8456.17	7918.6	9154.29	17543.8	8703.06	7527.98	7506.7	13622.8	10532.1	11940.9	9054.5	7599.57	7503.7	5318.93	16959.8
P04040	66.0283	119.947	72.807	57.611	53.5023	49.2404	53.6992	77.3651	48.7525	77.8415	27.613	35.4259	57.5849	43.6971	52.5214	58.5312	48.7548	38.9213	43.4844	106.505	149.033	48.4675	60.328	42.6385	63.6553	25.2517	60.6723	31.4411	28.4929	32.2132	44.9322	43.8927	74.1656	721.889	46.3085	60.1868	81.0788	64.2086	80.0995
P04075	39.4661	24.8537	41.5908	23.5892	29.1112	15.5857	31.8265	50.1491	14.8433	18.2809	21.1609	20.6633	16.6046	45.7417	28.2076	59.323	32.5206	17.5135	14.2709	41.5186	43.2629	36.5201	32.4927	21.5043	28.6306	12.5803	22.3668	17.0398	36.3618	17.9149	85.4079	18.7768	29.7899	165.538	29.2484	21.2031	55.6579	36.5216	41.5218
P04083	49.1091	30.5822	20.8116	28.8171	15.1128	13.083	18.0114	26.0225	28.2304	21.0304	27.4352	27.2696	19.6399	25.535	21.6016	76.0266	13.0133	29.8012	16.3329	10.7374	3.02051	10.2975	34.2004	18.0696	1.94521	12.192	18.6105	21.9286	26.3895	16.8633	10.7007	13.6472	26.7414	6.83448	7.23832	22.463	35.5254	13.9108	24.1842
P04114	179597	121427	144837	133246	126303	101131	178063	83395.8	87645.4	140915	107141	120995	146755	125562	161390	98784.6	138201	129103	159523	102618	161814	144891	180954	183390	198448	119119	156406	143510	151386	134363	112336	150815	204384	116627	149621	124006	150560	67283.9	174433
P04180	567.638	375.916	391.425	381.043	359.083	308.438	488.417	244.696	197.384	413.458	341.294	503.267	391.576	432.657	627.446	405.566	550.116	565.825	456.135	397.011	508.763	373.973	466.746	422.749	480.217	331.699	374.118	339.121	533.03	451.306	436.347	534.669	678.018	428.752	545.737	471.793	723.598	329.285	936.558
P04196	628.551	928.74	1141.56	1179.71	1196.89	1083.17	1091.97	822.189	1132.96	759.388	836.42	1477.92	1251.39	1135.65	940.797	1409.16	895.495	1293.06	819.761	1329.44	1057.89	800.156	762.807	742.276	981.459	990.081	774.937	967.736	905.221	864.111	1517.91	1027.38	1245.73	3331.39	892.332	915.277	1277.09	1233.18	937.037
P04217	135.723	107.442	142.41	140.709	276.746	144.13	538.436	111.17	93.6621	82.3732	126.393	134.001	155.636	107.651	175.898	135.47	133.366	127.137	137.32	278.789	111.403	173.567	153.955	147.466	117.002	103.201	116.48	117.476	89.2943	123.952	107.936	117.775	207.775	239.231	131.674	98.5458	134.931	155.911	179.034
P04264;P04264	4426.04	3563.24	4356.26	3006.99	798.678	499.861	893.78	1532.5	2148.62	3146.48	2841.84	1267.22	6780.48	771.036	4304.82	1071.66	654.296	2876.64	5017.79	2635.5	2798.01	1278.79	3031.48	2954.33	3776.21	1693.38	2052.14	1122.83	1441.47	854.526	1224.26	3932.8	1705.98	1099.72	1677.53	1129.93	2867.43	1238.26	1466.93
P04275	43448	72775.1	24271.4	65426.5	55671.2	160483	40940.5	48987.2	101992	69007.1	97603.1	34900.7	74677.6	23015.4	38227.7	55853.3	49801	88738.7	39722.4	50596.9	36760	33592.9	56374	58466.7	31703.8	101963	59726.9	61554.1	81925	43506.4	25104.1	34875.4	15494.6	14642.9	38848.9	41413.3	29948.7	30556.3	15075.6
P04406	176.186	125.742	194.175	110.265	146.043	109	168.343	289.925	74.363	233.82	108.32	99.8864	108.94	205.086	146.679	818.068	126.028	133.791	202.939	222.72	330.266	135.872	161.971	103.949	136.544	55.4393	94.7762	115.583	115.74	75.6574	567.808	91.3863	127.635	528.954	114.821	81.501	289.424	124.796	179.758
P04430	948.223	773.864	543.443	540.091	867.639	1327.41	292.003	1174.46	804.891	848.769	541.781	1674.98	678.734	387.591	928.14	1217.14	594.256	597.487	873.401	1496.3	635.92	1068.4	568.926	564.325	897.321	681.019	336.126	967.122	692.758	1597.5	1054.74	267.62	530.101	1102.81	1239.82	790.174	732.026	1954.52	743.94
P04439	332.433	116.122	204.43	105.19	207.675	73.7723	154.359	179.368	114.088	104.983	129.532	132.76	104.175	126.493	156.608	145.065	167.52	148.275	134.396	96.4287	161.985	326.411	114.391	34.27	124.226	32.9454	147.903	143.599	139.477	116.417	46.5733	84.3307	29.1749	249.431	248.508	193.487	207.84	319.649	261.488
P04839	63.4799	97.3072	59.1745	47.9661	51.8681	43.1577	34.2607	17.8771	13.2208	37.4465	12.4407	30.3435	32.295	58.8473	18.7759	43.8776	24.1064	27.2766	16.7662	41.1122	15.9968	33.8631	61.5053	33.8162	37.9086	34.5754	26.6635	39.3073	41.6623	16.2947	32.3808	10.7752	31.4555	37.3502	26.9723	27.4922	89.5937	31.042	74.3632
P04899	70.9614	94.8131	140.351	65.0172	68.4576	50.3909	78.3693	49.4351	56.0321	47.9762	67.0891	54.2686	32.9643	82.9801	74.745	56.6551	72.2356	51.9894	60.8082	111.036	90.857	77.2241	95.2072	90.7765	71.2116	49.8134	78.9858	70.6262	62.4876	57.0293	41.1157	47.7857	93.7741	163.234	79.7432	76.3923	156.617	95.4779	192.386
P04908;P0C0S8;P20671;Q7L7L0;Q93077;Q96KK5;Q99878;Q9BTM1	166.158	481.737	489.934	283.838	357.618	215.126	420.238	503.24	55.0047	285.311	145.622	203.155	109.244	445.846	70.9238	599.446	184.636	156.389	670.866	196.592	351.837	224.652	238.422	200.844	25.1512	88.2339	144.05	324.88	109.994	55.8746	146.371	52.7839	38.9278	118.201	70.0384	105.297	101.063	50.5631	159.909
P05023;P13637;P20648;P50993	33.9418	40.1588	40.7954	25.3238	33.2601	11.3472	20.2015	45.5513	34.2786	22.5523	30.3193	31.8913	33.4796	29.7693	35.4933	34.704	22.349	19.1091	14.4213	43.5289	27.7294	56.5085	35.9357	47.0305	33.3025	35.6125	29.6143	60.3313	35.4786	22.4968	22.1099	19.8939	25.8122	40.727	36.0487	28.6453	46.8082	111.139	44.9328
P05062	92.5613	71.6571	33.153	53.4458	134.937	18.2773	60.1421	89.2939	99.0207	87.9533	60.0076	82.7093	17.8047	83.8347	73.4906	39.7006	85.343	38.684	41.9732	50.9318	96.5521	80.1011	37.9682	37.9682	10.4559	164.734	88.4337	63.9791	56.7117	77.6105	73.0351	151.258	93.6603	36.567	84.5718	77.8746	52.8202	180.459	57.3319
P05067	679.062	768.333	758.16	1231.55	1655.17	436.867	1063.05	1117.33	802.51	793.802	912.039	1332.87	957.979	1678.12	644.325	866.208	1155.09	964.292	712.903	543.077	781.177	633.864	525.876	492.048	695.062	678.488	1299.37	733.495	887.427	1398.5	566.745	426.595	749.108	1267.92	791.792	685.025	424.612	80.7538	661.362
P05090	36866.2	22739	25215.8	21578.5	33895.8	25347.5	43435.5	22199.5	22552.7	22582.7	16430.7	23484.2	26056.8	33580.7	25009.5	23933	33532.4	22810.5	48591	22562	32637.9	22658.3	38834.7	38965.9	36501.9	30847.2	30107.1	22044.4	39461.8	23627	37056.4	41533.6	50613.4	22188.8	30866.6	46052.9	74410.9	14226.9	50189.5
P05106	1515.63	1745.8	2800.14	2200.38	1924.67	689.234	1707.72	1634.59	1229.87	960.509	2957.25	1361.54	1084.61	2672.92	1560.47	1409.92	1718.96	2666.93	1360.42	1196.37	1433.11	1144.93	1398.13	1278.67	840.77	775.09	1852.89	1682.48	3596.85	1212.44	721.76	959.62	1190.21	3040.4	2136.15	1363.06	2837.3	2624.97	2380.31
P05107	55.6215	160.32	95.8735	79.2827	97.0087	59.3225	90.3182	52.2087	50.8425	59.8435	66.1591	56.7939	40.8524	105.952	53.0471	104.725	72.6074	61.7422	55.9422	82.0934	68.0682	61.7658	75.5337	69.5043	54.7871	57.9857	65.4463	83.932	85.1153	36.5724	55.5536	65.2936	67.9235	73.9354	78.8544	82.9238	98.1622	88.2814	93.2767
P05109	65.4784	158.18	122.398	67.6373	108.991	84.7377	73.7106	202.82	61.0196	97.7272	67.75	51.2796	120.309	87.4813	84.5144	67.0477	80.4814	97.5809	37.824	125.027	224.45	117.972	193.849	154.679	125.231	108.147	82.9933	130.829	255.884	183.37	84.4569	92.5673	109.008	235.046	101.339	116.408	178.288	117.287	164.906
P05155	746.044	781.883	1028.27	771.245	1124.85	1324.71	1076.47	951.307	1096.4	863.148	1132.27	1013.99	662.666	1116.43	1573.34	1609.16	952.432	1043.05	1005.63	961.145	913.396	842.637	538.492	598.855	740.137	1192.11	1205.9	1211.61	833.051	1387	1403.9	854.319	776.062	1300.91	954.46	906.437	668.136	774.626	865.308
P05156	57.9775	42.3806	125.809	116.449	96.5009	144.792	127.346	79.3878	54.2887	527.446	122.574	215.765	160.393	173.642	83.093	91.0217	90.7397	223.677	80.6621	166.904	50.9831	39.9087	63.9239	56.7387	45.322	75.0431	61.5158	106.864	48.3921	153.93	69.1826	89.6573	133.829	126.452	54.0772	53.0011	45.0402	194.715	80.312
P05160	42.5383	29.2322	33.4466	27.5686	37.5519	26.9876	32.2257	49.8995	28.474	21.8851	25.111	34.8135	55.9647	51.3838	28.5625	32.7548	26.2341	24.9806	27.4196	28.8532	41.3509	47.6998	21.6314	32.6447	40.6617	38.8827	27.717	33.5642	34.7153	23.4307	47.4302	28.8749	31.1476	33.705	28.7627	35.1684	26.0384	367.262	35.2408
P05164	41.0219	239.281	155.569	56.3845	203.872	48.2072	135.228	32.6486	97.707	79.7758	26.3159	37.5556	66.8294	225.007	27.1945	72.0948	52.6985	56.7315	35.2588	38.9711	132.127	49.5177	62.0035	63.1099	58.531	46.6169	70.1688	134.067	42.4683	87.9479	27.7436	97.0704	194.747	37.0825	31.1606	88.5855	36.2048	21.5272	39.5322
P05186	56.997	106.196	68.6701	123.789	347.873	90.9935	65.2929	100.417	76.0519	29.5079	42.3011	104.814	88.7672	29.6433	92.6137	71.553	73.6588	63.2145	31.0523	57.2348	126.09	32.1872	116.744	103.441	75.2977	59.453	55.9585	66.5212	72.0232	55.2132	57.4287	38.9426	102.251	61.9589	77.2232	56.3325	28.9012	141.311	73.4359
P05362	54.4293	139.705	45.9299	90.4865	149.5	625.402	83.8333	40.9611	52.5957	88.6769	110.421	27.3103	99.6441	33.2214	65.2554	63.0234	45.3345	68.9317	98.8492	67.5172	71.8586	41.8999	73.6533	67.4725	45.8032	208.188	59.0653	56.5058	79.5654	107.436	35.5202	60.6421	74.6438	103.516	70.106	85.6345	49.0745	58.1373	59.001
P05386	28.8324	2.78605	19.7302	5.34949	3.71763	15.236	15.23	33.1847	9.39859	26.1696	8.19675	16.1871	11.9922	14.6436	15.2301	118.931	3.79135	8.81186	17.0079	18.471	21.7105	9.80446	16.0341	6.641	24.2194	11.5009	8.40023	14.2266	23.2237	7.52555	44.4892	2.5607	12.7147	20.8348	6.63034	7.35737	11.5744	10.265	4.49544
P05546	166.8	121.104	150.36	155.843	171.291	158.509	244.93	92.4842	125.224	141.178	198.498	182.788	247.21	391.214	187.13	171.555	135.051	249.349	222.425	201.143	152.025	111.021	173.681	176.575	207.842	125.55	216.394	386.262	155.431	261.283	59.5171	202.44	230.984	170.175	107.813	92.312	146.969	173.25	238.308
P05556	154.637	217.923	247.119	180.411	229.727	124.711	215.494	186.545	143.262	138.63	272.09	173.013	161.551	295.011	164.173	233.437	216.651	318.327	168.233	149.736	213.226	144.053	175.601	181.222	111.974	169.605	261.751	279.667	359.921	183.894	131.026	123.509	195.997	264.83	233.166	184.926	224.544	358.139	258.879
P06276	182.196	114.072	59.7046	176.197	49.9362	131.481	175.73	152.125	131.585	118.413	169.036	208.735	110.754	228.425	154.138	233.055	217.133	129.461	120.368	90.0292	130.198	94.0611	93.1833	85.3094	121.698	250.42	122.425	109.596	71.0581	153.442	142.267	160.278	108.506	254.748	116.76	132.781	159.649	119.555	143.36
P06310	553.632	236.762	263.389	164.352	402.59	189.466	93.7332	494.291	246.505	260.182	264.299	931.309	398.275	330.528	390.867	299.749	267.295	365.202	547.56	768.885	236.555	449.77	147.212	190.944	383.286	331.478	221.458	457.808	358.977	359.428	700.648	250.669	381.023	724.758	732.994	449.948	236.468	536.582	273.59
P06312	45334.3	32563	51181.4	36121.6	22800.7	26860.9	25044.8	36598.7	29072	22420.7	21779.3	43412.1	41594.2	23480.2	34962.5	9681.18	41139	18236.1	28504.9	56690.2	14754	31961.3	19935.2	19797.1	30765.2	28187	15606.7	49833.2	30914.4	21504.4	22626	30594.7	27496	23536.2	45033.8	24346.2	22564.8	60706.9	40405.7
P06331	1792.86	1611.87	1568.67	1416.14	1524.49	1350.08	1341.97	1422.47	1504.24	2369.57	1064.31	2406.94	1613.74	1397.18	2822.34	2065.11	2651.72	1589.28	1361.32	2591.42	1326.7	2118.45	1306.61	1413.52	1618.26	1370.88	787.684	2235.17	1697.89	1501.62	1060.6	1407.31	1371.66	1304.79	1540.79	1003.27	677.207	2821.76	1440.12
P06396	1062.88	1009.4	1068.09	898.795	1412.31	843.226	1401.62	951.463	820.351	1003.44	1046.22	1540.81	1598.13	1907.3	1154.39	1048.07	980.214	1291.18	1423.41	1126.21	987.547	770.391	1436.28	1347.21	1062.35	1046.34	915.291	1121.33	1077.89	1238.46	736.407	1106.51	1639.53	2241.19	947.259	1151.34	1227.6	1217.59	1337.93
P06681	29.5472	26.433	44.9729	58.7985	77.9937	26.3201	109.609	34.1267	54.513	45.8996	44.2283	70.5854	56.0531	40.6567	48.8933	49.2034	48.7915	58.4988	44.0465	103.382	46.6345	57.7942	55.9237	39.3736	38.6801	36.2635	45.5553	55.6187	66.4907	24.4345	48.4919	32.3683	64.4615	44.9952	24.2709	30.2962	29.4464	41.1246	42.7089
P06702	26.1531	104.887	47.7768	41.3296	72.014	45.2711	56.1861	101.729	38.6273	56.3416	33.2939	24.6834	47.4928	28.4361	50.3719	55.3041	37.9919	73.2407	59.5413	23.9099	35.6822	79.0679	82.5042	135.153	71.0073	62.2052	41.5554	45.8668	164.73	128.625	70.9377	43.3672	57.8528	209.773	75.3187	42.6783	153.107	80.7816	111.907
P06727	1987.04	1744.78	1106.22	1933.61	1257.26	5022.2	3817.05	649.657	1449.76	1492.22	1636.89	1378.84	1093.35	1699.11	2092.33	4814.57	2064.17	2101.76	1521.29	1895.17	1874.41	1337.12	1459.92	1419.08	2620.32	2951.77	2273.61	2982.92	1652.14	3530.04	1737.7	1769.56	2173.21	1940.22	1058.93	3906.54	2760.46	1979.78	1974.73
P06733	57.9477	26.45	48.0502	37.3218	32.3777	26.2654	38.5992	65.6585	15.3585	101.873	22.8327	25.0122	23.8846	51.4119	49.8281	219.86	29.0283	14.8232	77.6293	38.043	98.7287	27.9348	49.4433	14.9579	43.7484	45.7018	25.7825	4.84939	25.5216	10.1242	127.897	10.853	19.1487	105.986	21.5896	32.5418	57.832	52.1222	50.8129
P07195	34.9649	156.127	78.0461	120.199	93.897	93.5211	76.0835	126.04	85.2199	41.082	29.2327	80.1171	55.4854	92.8242	76.5907	159.7	122.543	86.4533	19.6724	73.7638	280.34	58.8197	121.313	125.726	102.318	81.9697	106.92	80.4089	67.1617	97.8286	59.2991	97.2775	73.8877	199.439	71.7969	22.7726	58.6703	75.545	58.5376
P07225	16272	14307.8	15656.3	19724.9	13404.1	12765.8	11165.3	10929.7	13138.9	14825.1	7195.82	7467.12	11643.5	10185.7	13699	9070.92	12157.5	13852.5	16018.1	14511.4	20616.8	15841.4	18161.3	18232.2	15173	13700.1	18156.1	16658.2	12123.9	18016	16849.5	15961.4	16030.6	15014	15690.4	13121.4	12425.9	11084.2	18086.5
P07237	192.274	132.077	94.8095	258.217	105.585	208.314	115.265	88.1255	88.8916	100.452	98.7681	70.1146	82.5567	112.918	141.347	155.447	88.5245	104.228	88.1041	97.9305	113.598	70.3035	119.757	89.1766	137.669	131.944	88.0253	125.715	109.639	86.3045	123.846	98.8001	267.749	217.632	71.0312	89.5286	130.668	96.8148	137.083
P07355	73.5784	51.3806	69.6602	41.8741	22.2028	54.1272	50.4921	45.866	32.6658	42.4338	43.7949	54.7374	45.3764	21.6944	47.0853	94.7517	36.028	34.2073	49.9288	66.7104	72.9411	38.5491	58.2992	53.9612	42.1365	25.3736	41.4814	30.4343	38.7296	36.5138	108.822	52.2565	56.6556	45.095	37.2367	52.8228	44.2231	31.1897	73.0045
P07357	60.552	164.169	146.744	127.819	243.053	95.5447	226.157	174.509	150.268	85.4175	81.8584	208.516	124.265	156.081	135.506	283.31	302.054	175.781	126.19	134.969	110.338	70.7246	50.4523	53.1768	44.344	71.5311	82.4202	170.897	102.774	86.8909	115.785	88.2296	67.8582	79.6873	36.7099	102.629	48.6664	83.0298	63.6275
P07358	80.1006	210.064	228.738	160.113	196.694	96.112	233.301	282.047	237.498	139.954	107.21	291.995	148.413	220.031	202.187	349.663	392.955	204.447	246.184	174.286	178.365	113.896	84.6647	78.163	72.3566	81.5033	130.105	189.782	122.68	131	153.418	120.11	98.3608	127.76	72.978	125.955	81.0962	97.967	76.4587
P07359	167.145	159.86	196.104	169.369	160.653	104.047	192.826	215.213	159.071	285.351	257.091	205.959	168.58	272.716	278.941	194.883	167.81	242.549	158.613	148.991	233.949	333.274	179.05	221.043	142.65	165.535	207.103	193.076	282.015	173.199	317.396	199.251	263.444	587.422	242.596	222.652	281.13	358.328	297.289
P07360	121.84	351.226	366.929	289.131	523.374	199.329	259.251	308.184	297.132	261.19	166.032	324.142	161.994	290.325	182.558	449.555	388.642	270.505	251.176	216.071	124.939	118.342	123.398	109.091	152.835	126.028	128.048	213.828	82.6327	95.303	101.341	150.93	147.755	98.7994	101.373	96.0723	104.454	99.9076	88.6677
P07437	56.7566	38.6924	59.2857	54.6374	46.5888	45.9663	35.7163	35.873	28.2274	57.7375	47.4303	30.3293	32.2547	110.133	53.2704	111.456	62.0743	48.738	43.4887	76.337	61.6779	183.39	59.0998	49.4516	35.9712	40.2767	50.9003	34.6657	99.7712	47.8447	232.792	41.0111	78.911	143.219	51.7401	113.476	131.173	152.373	69.8741
P07602	84.5224	47.4921	66.279	68.7825	45.6451	52.2733	110.561	68.9796	75.7603	74.8794	46.1019	41.94	50.1204	44.1556	39.9987	123.708	43.4621	67.7904	79.7217	26.8247	86.6611	89.3114	38.0427	39.9911	34.1311	48.6919	56.5542	15.8916	80.6978	40.6558	69.9401	53.6627	38.4697	59.9529	54.4338	28.1552	45.0294	33.8727	38.3414
P07737	205.016	286.804	400.191	149.852	180.671	105.999	262.913	112.286	184.053	101.768	262.348	186.434	109.159	448.623	354.336	218.066	344.169	193.647	130.948	516.948	222.398	209.319	261.699	222.176	163.771	124.055	252.57	176.506	322.038	178.285	75.3419	166.175	320.455	1090.75	416.687	193.888	684.901	275.54	541.079
P07900	64.0985	57.2668	67.6308	78.8352	74.5282	55.5332	131.023	94.5982	33.8547	146.612	45.1471	57.821	37.1801	42.1661	68.3843	209.132	39.469	48.517	101.38	52.6882	190.22	41.9021	95.7075	33.681	58.2472	36.8284	48.8043	45.2245	38.2379	42.0065	199.678	14.3474	43.7175	177.655	35.8088	80.5912	70.7451	86.0732	53.7664
P07942	252.228	348.447	243.538	302.292	302.177	350.435	273.146	376.208	789.981	247.387	393	429.467	283.51	382.499	273.32	366.307	275.377	299.693	274.692	240.871	405.905	317.346	221.594	216.461	247.12	345.493	329.71	272.877	306.456	355.944	440.468	307.737	321.176	318.298	314.954	476.484	221.237	403.407	260.558
P07947;P12931	135.134	143.067	185.637	126.127	103.789	59.1415	149.717	150.78	70.2645	82.7013	129.776	95.7987	94.7848	167.48	160.273	97.4178	107.432	177.873	100.179	118.881	130.414	137.769	97.0861	75.1505	86.5458	140.588	66.7201	137.885	122.794	98.0149	152.03	57.9176	129.708	325.349	136.846	137.17	196.138	122.993	199.943
P07988	207.239	49.0401	172.455	35.2507	63.57	184.432	95.9173	37.2329	53.5762	66.8979	97.7785	58.7919	55.176	52.565	32.0006	35.375	55.8699	46.1272	150.179	31.1711	100.219	30.9752	61.438	56.1843	44.5535	155.154	78.4765	111.596	72.4456	36.649	59.1401	39.7063	94.1053	30.8464	47.7909	73.0089	64.4943	21.038	77.6926
P07996	1462.04	2006.54	1888.14	1861.16	3126.78	1074.29	3752.47	2204.52	1667.13	7186.3	3864.67	3559.57	4962.26	8998	4926.88	4076.44	10663.8	12884.8	8541.29	4626.07	1952.94	2285.64	1447.86	1514.11	1385.8	1826.26	6413.93	4363.23	2819.03	2574.11	1851.6	5385.89	3900.01	6923.09	5458	3633.03	4124.31	1009.1	8924.8
P08123	537.723	795.959	400.19	833.087	381.96	800.559	824.358	1094.3	3110.72	529.15	2369.75	699.776	489.012	577.283	473.579	1194.68	566.063	440.437	425.813	658.358	681.121	1357.48	491.138	515.87	983.17	1005.58	1088.63	348.887	871.296	1240.99	1110.91	394.916	795.9	703.315	649.868	1686.08	955.23	660.346	354.567
P08133	23.2565	37.6402	52.765	46.2047	27.3326	26.3874	17.4439	23.1025	11.8723	34.207	38.2366	17.8302	27.2238	12.6197	29.6811	22.6882	18.2128	24.377	36.3081	24.1204	106.987	11.0775	38.9792	38.9792	32.0312	24.9772	16.3514	26.8317	24.5763	38.5193	54.9775	35.3153	21.7881	16.0422	39.197	43.0405	11.444	25.6249	22.2073
P08174	49.4124	19.568	22.597	26.8239	35.9174	14.4276	18.0473	14.6927	24.6661	20.3536	26.1456	16.0824	25.6302	25.0993	11.8353	42.2102	15.8024	24.6677	23.2054	17.7226	12.7742	23.3317	33.9661	13.395	36.599	19.6083	14.8375	13.0939	29.3938	21.2947	18.3691	14.6194	7.49686	24.2164	12.2092	21.0275	15.6804	34.6488	24.1885
P08238	302.59	45.8664	84.1367	172.033	247.698	216.058	157.542	85.994	120.813	403.65	103.165	232.714	350.767	80.4694	306.626	1329.76	91.3658	37.2216	159.228	113.974	221.854	167.805	334.417	63.3434	343.491	187.862	145.832	138.127	34.7935	226.942	446.908	202.78	75.9043	628.623	50.7354	99.8318	188.82	412.502	274.732
P08311	25.2494	100.463	49.3246	36.3487	102.698	62.2137	53.9895	23.3409	16.7839	40.3624	52.9225	18.2484	25.1209	71.5511	39.5691	92.3976	45.3834	29.5091	36.264	8.58342	33.7404	76.5007	70.6068	54.7435	33.1054	29.2983	78.5594	129.813	28.3535	22.8159	15.0606	18.2468	13.2915	34.1655	17.7194	40.4474	78.4822	35.9733	26.3095
P08473	134.46	107.637	173.71	366.883	341.223	97.836	108.103	44.7002	74.881	131.324	58.669	62.9656	67.9155	55.5803	114.097	61.0888	70.4955	95.1637	37.2415	46.25	59.7223	53.8044	149.769	161.198	224.673	86.1104	56.7907	130.229	44.8161	56.6057	23.0801	55.9096	131.323	64.5406	35.2174	71.1049	113.847	63.3323	497.642
P08514	1448.3	1532.54	2874.08	1955.76	1753.26	680.709	1615.7	1528.09	932.803	910.993	2675.11	1188.21	1031.67	2253.86	1495.67	1353.31	1399.94	2208.91	1135.78	963.429	1421.71	986.622	1356.64	1133.35	841.249	709.177	1605.57	1285.3	3061.35	1050.84	732.043	824.845	1202.72	2649.1	1824.89	983.118	2643.53	2070.33	2233
P08519	7069.93	18611.7	8133.82	73500.6	13809.2	13296.2	1922.95	8215.35	10534.2	159336	25713.5	14931.5	50825	54783.8	9741.94	5510.06	11283.7	139577	15308.3	7418.37	18628.3	21296.3	30678.4	32840	32923.5	15280.9	96743	19103.2	63944.2	260771	31758.5	108878	56591.8	11107.7	69978.5	59432.1	51717.2	26078.3	12553.8
P08567	95.6104	78.7	218.424	90.3166	70.5877	40.6584	83.1908	89.0714	55.7843	25.1802	95.2703	77.4798	20.3455	141.463	124.665	120.085	138.253	73.3702	96.6662	179.315	98.7125	54.0646	91.4235	38.7673	61.3108	18.8971	72.8277	58.9798	83.071	46.1009	11.6364	37.8778	84.2728	392.911	116.499	51.9142	248.141	132.52	159.174
P08571	100.234	73.9509	97.8728	69.8911	111.917	108.54	110.686	37.0641	53.234	77.5361	99.5305	72.2471	172.889	95.7867	93.6707	63.4106	47.9123	108.944	135.983	73.5137	109.666	118.284	151.035	125.026	108.859	81.2599	111.782	80.6088	96.1497	104.284	68.9305	78.0175	108.325	82.8821	110.665	65.1433	94.3085	46.1632	93.6146
P08572	149.207	259.974	180.718	258.627	185.412	280.379	214.501	280.944	487.68	201.104	337.074	212.146	138.762	230.846	185.108	195.452	247.164	229.115	183.819	144.768	131.576	406.29	155.784	166.055	142.584	274.176	192.487	964.312	180.023	188.501	299.034	224.418	205.234	224.22	253.037	293.3	179.067	192.346	220.405
P08575	89.796	87.1265	117.508	89.6955	68.2455	43.2817	87.6053	61.2994	44.3054	46.6416	59.899	58.4391	35.4398	81.975	52.6171	53.2065	43.2395	59.4958	40.9749	88.8871	59.0845	101.768	75.5605	75.9199	70.3812	47.3329	41.4255	49.9085	55.6862	37.0094	32.0476	49.6285	62.4907	76.4774	86.7363	53.3542	103.322	102.765	118.691
P08603	1776.34	1998.25	1812.87	2158.12	3198.88	2651.48	2189.81	2967.54	3439.71	2889.05	2910.63	2886.89	2516.95	2767.95	3032.62	3518.4	3205.44	3149.04	2786.2	2216.81	2250.85	1754.58	1718.45	1805.6	2445.81	2446.35	2187.39	2517.71	1678.5	2539.38	2901.29	3372.96	2313.2	3892.64	2302.34	3912.85	2181.81	2996.54	2463.37
P08697	1296.63	945.202	1125.44	1429.07	1079.25	1762.42	1475.83	1208.39	1704.95	1078.51	1282.72	1714.89	1994.44	1499.67	1317.44	1293.1	1683.09	1408.37	1289.36	1880.37	1536.9	996.787	1513.93	1715.9	1168.39	1302.69	1368.31	2054	1397.43	1271.36	1098.94	1582.25	1423.44	1027.95	1004.98	900.205	820.496	1546.04	1969.59
P08758	46.5472	75.7429	108.304	93.9184	59.3609	33.8035	58.789	76.018	48.7032	46.9621	156.934	44.5401	72.8388	78.8437	49.6133	94.003	47.9794	73.7468	69.1549	48.6082	63.012	56.3779	61.125	54.5579	50.956	37.1694	119.339	69.5078	145.964	42.0675	46.3746	38.287	39.7138	119.758	102.467	48.0045	101.862	41.4008	85.511
P08779;P08779	42.2626	63.4601	76.9446	64.4454	92.6587	51.9166	8.58802	8.25828	33.3965	26.1906	73.838	8.865	175.116	59.596	352.028	53.5507	22.6368	142.605	309.198	35.1179	282.418	46.9106	66.7475	62.1621	40.5752	14.9044	537.893	30.4848	162.472	12.2521	40.3406	81.1661	97.8067	10.9513	15.8273	89.6193	31.6087	222.2	34.1925
P09172	32.0966	57.5421	61.9632	27.2699	31.8149	12.3656	8.23108	46.8136	57.9597	28.1526	17.1561	58.0849	19.8842	40.6018	59.6491	42.3233	40.1987	32.4666	26.7986	13.6825	45.8913	21.2562	19.5359	30.0153	33.2314	21.7681	13.37	9.53059	16.4699	63.9376	31.0969	7.37662	36.8951	102.715	20.395	18.1451	7.90716	115.301	49.7162
P09486	85.106	82.818	70.1507	101.205	96.1946	48.9811	102.284	46.717	61.82	85.9796	108.613	103.043	119.535	140.358	99.8123	101.95	107.228	118.541	103.453	93.6281	163.254	61.6108	98.3157	111.728	91.7406	90.2964	98.8097	104.25	136.814	102.383	102.216	132.189	107.738	173.279	131.531	97.7765	65.6015	61.1584	118.379
P09525	82.2083	69.9593	159.976	99.0788	62.8016	28.1483	115.69	137.003	57.4873	81.2676	186.678	43.5157	15.1402	78.7952	47.0626	55.7024	54.419	60.5475	47.9892	47.0891	66.3346	45.5694	58.5911	43.243	44.7712	36.3058	89.1534	45.3549	82.6368	26.8595	89.016	23.2722	20.6379	48.7652	89.335	37.8532	53.8012	85.4753	56.877
P09651	11.1378	51.6892	53.0464	35.8446	17.5253	85.4598	33.7527	80.9049	40.7137	9.8103	27.0513	52.2527	43.0505	32.8075	33.7527	79.842	38.4364	47.8377	51.6839	38.6227	82.3383	40.5435	37.317	56.0964	57.113	50.0677	51.085	38.5761	46.4085	43.2468	69.7563	33.0007	33.2848	6.61839	40.8964	59.5026	33.3796	52.2527	56.0964
P09871	13745.6	11109.3	16433.6	14621.3	14513.8	18096.4	11350.8	22508.7	18180.5	18183.9	11863	10341.8	9273.23	10333.5	11837.9	12156.5	15367	13573.8	11770	9800.49	25672	16983.4	9861.23	8738.95	13827.2	16354.5	13023.6	12357	10409.8	18746	17943.2	14129.7	6653.4	19998.3	16790.8	10687.4	11344	1586.46	9302.77
P09972	13.1213	27.286	27.1202	8.41735	20.9367	3.95953	22.8379	2.08424	6.29383	12.5298	24.4412	14.4686	6.18555	30.3855	12.3361	6.68463	25.5456	12.6918	8.78069	32.2308	21.0323	7.51897	12.4181	12.1362	18.8417	32.7935	9.36714	16.17	11.2699	12.849	10.0949	5.68457	21.929	213.775	5.88332	10.9088	27.4175	43.1044	35.5861
P0C0L4	5851.69	3696.39	5089.72	4096.79	5537.17	7020.35	6567.06	5821.84	6855.08	10059.3	7195.61	9071.35	6754.81	7059.05	7613.49	8007.9	6330.23	6474.84	4801.34	7100.33	3350.9	4674.7	3373.12	3200.92	4871.06	6666.11	8907.56	7098.84	11568.6	9575.25	15902.7	8812.37	10086.5	7954.14	6277.88	8039.49	5977.65	3407.19	7383
P0C0L5	393.965	335.662	649.659	466.197	733.231	548.543	294.305	705.57	349.796	568.928	552.828	588.885	399.313	432.719	553.408	429.306	426.821	418.566	447.726	644.122	371.976	471.395	300.446	345.835	212.549	421.231	235.67	141.266	456.797	339.198	974.6	352.425	455.25	341.577	398.637	242.636	323.89	540.373	450.642
P0C0S5;Q71UI9	28.9639	24.6378	22.1443	30.372	19.0993	19.5839	28.3251	19.4996	17.7608	26.3798	12.7338	18.4745	11.3937	12.8371	19.4687	40.7307	16.2428	29.2316	40.2364	20.5718	44.55	9.47505	22.3901	1.57296	16.9219	12.7024	14.6644	20.9644	14.0212	8.71837	77.8197	23.1297	20.2915	29.3876	6.12838	19.9623	20.9311	19.4243	6.71068
P0CG47;P0CG48;P62979;P62987	592.572	507.402	642.356	747.981	619.908	305.895	394.784	400.302	219.67	433.294	536.572	231.511	263.334	313.004	471.2	382.645	350.374	432.309	324.562	451.027	524.675	227.616	462.87	452.103	431.614	223.942	377.246	446.068	547.537	345.392	259.436	274.169	428.776	535.516	260.096	300.551	458.885	218.329	601.082
P0DJI8	1999.32	380.634	968.451	1211.46	7136.43	7169.34	1613.87	591.707	285.682	1133.19	2988.06	169.685	2393.13	379.197	724.649	858.428	691.865	2099.39	1023.32	838.409	640.067	677.559	14445.8	13483.2	1723.99	2239.88	1772.42	960.438	705.219	1436.56	3424.88	839.309	3629.12	672.128	627.034	317.306	1449.88	1441.2	2259.47
P0DJI9	112.914	31.3259	150.344	73.9876	1641.86	334.258	179.003	31.8059	63.5818	149.873	84.9914	29.1267	240.914	33.6532	99.2043	57.7114	50.8488	257.899	61.7734	96.9832	65.8285	92.3391	1862.32	1206.88	181.676	119.003	70.2686	103.309	78.0182	136.519	310.414	72.6729	336.167	90.6124	78.1973	65.1121	167.597	51.313	172.585
P0DMV8;P0DMV9	109.416	51.1608	84.8022	67.2386	159.397	59.7584	83.3393	125.103	17.4107	39.2951	34.3836	60.5879	122.867	90.7872	28.6764	77.3687	61.33	42.3759	71.2556	31.2523	38.5867	42.7492	48.4255	50.0832	42.5788	92.3647	64.4677	80.2034	93.0397	49.3938	298.276	64.3058	78.4996	81.9685	44.2016	39.2527	92.9553	86.4204	170.63
P0DOX2	1250.19	928.94	2405.12	1442.8	1010.67	726.875	1478.29	1170.28	1133.97	726.757	758.808	2054.74	1374.87	1124.32	1690.42	630.699	2579.26	645.575	1453.57	2320.43	865.41	1540.17	941.159	935.394	1887.59	1276.04	636.179	1261.29	898.636	1363.28	706.998	590.663	813.682	599.592	2065.06	792.003	678.315	1900.12	949.781
P0DOX3	296.699	149.247	585.076	713.181	516.237	271.897	300.887	678.66	574.209	566.904	112.181	242.508	228.469	583.244	636.272	294.59	186.538	426.178	305.379	267.078	313.288	781.825	542.492	432.285	574.128	147.962	110.252	368.063	420.903	223.613	306.28	258.491	158.551	296.242	109.774	74.5841	412.061	346.15	98.9852
P0DOX5	5285.77	4667.67	4299.95	10096.9	6347.02	3840.36	9167.97	6404.91	6766.98	6795.29	7680.63	11359	5862.26	8672.69	4859.47	5694.45	7372.1	5132.15	4345.59	6564.21	2934.61	5080.29	3559.53	3988.33	3943.48	3402.17	3244.16	6392.93	2935.77	4420.29	5138.49	5574.13	3185.98	4991.31	6327.28	5521.54	2626.03	7961	4436.47
P0DOX7	58451.2	35983.8	68401	36786.4	33485.5	34412.6	42096.8	57885.1	47175.7	35007.9	28725.6	62976.7	53422.4	31584.4	54773.1	35582.5	44654.8	21153.5	33811.5	49673.2	34178.9	39841.3	25905.1	25161.2	41361.3	49813.5	24131.4	39279.7	35574.4	25141.5	38941.5	27250.5	34740.3	33290.7	53679	24802.2	36317.6	70922.3	36048.5
P0DOX8	40698.7	32645.7	56780.4	36759.7	33668.8	47495.6	32670.1	35763.2	37679.3	31676.4	20766.5	46322.9	46589.7	24526.4	40176.1	25673	48769.7	23127.2	34348.5	45843.1	30031	49127.3	31740.8	34554.9	39998.6	59710.9	28002.2	41070.3	28478.8	38435.2	39307	26740.8	26662.7	37445.7	43947.1	31640.7	29134.7	65136.4	29057.7
P0DOY3	6693.59	6428.86	11481.1	4400.93	6081.2	5824.87	4736.98	8203.8	6036.55	4675.5	3796.17	7449.19	6070.8	4481.35	5859.21	4756.37	6290.92	2865.82	4306.08	7251.18	4712.29	8506.14	4276.09	4477.56	7230.88	7000.77	4680.67	8287.29	4476.15	7415.04	4599.4	3782.96	5056.09	5795.27	6744.91	5052.22	6234.9	10283	5049.08
P0DTE1	244.409	117.737	117.129	67.09	97.1575	182.866	148.464	56.1209	123.303	331.815	114.68	113.313	196.62	92.845	365.063	87.4582	84.8794	168.604	174.358	72.0582	96.1424	86.2226	158.549	135.308	227.214	69.3889	124.746	182.019	162.498	69.3801	155.268	105.836	284.902	159.853	70.2559	112.111	155.338	137.873	247.604
P10124	1696.45	2253.86	2709.71	2294.61	2050.11	1664.94	2695.14	3526.95	2298.02	2253.81	2070.14	3224.82	2530.02	3587.07	2389.07	2577.67	2399.68	3823.34	2683.32	1326.07	2890.24	2536.89	2320.84	2098.34	1914.44	1857.07	4208.56	1677.03	3159.16	4401.04	2727.28	2295.47	2221.46	4018.82	2822.99	3141.34	2201.84	388.715	2387.84
P10321	51.2996	275.376	56.7205	158.988	84.8022	80.4869	169.308	96.3179	13.2346	54.2598	117.297	102.839	89.5666	185.533	62.3723	105.736	66.2281	120.278	160.34	128.184	302.328	268.18	107.803	159.562	36.2455	94.5903	180.456	117.673	376.793	42.2603	114.617	198.863	154.62	230.711	30.1251	106.033	141.313	169.863	90.27
P10586	49.7769	27.9887	33.1067	56.156	39.4805	67.6995	43.4537	37.0996	34.5987	50.9859	77.4421	83.3963	44.7001	63.4503	48.2967	76.2473	71.3965	65.5927	76.2793	31.7381	44.7422	49.5076	46.6962	50.4532	33.0949	40.4664	52.233	37.3283	60.7838	44.7659	43.4086	38.546	30.7717	35.9526	29.5472	63.9539	30.5553	29.6321	31.7532
P10643	269.649	736.735	777.832	537.97	766.991	443.699	702.677	786.541	1008.62	445.312	391.767	786.163	363.918	721.206	420.825	749.207	909.592	625.178	617.191	529.4	310.641	271.582	271.807	311.738	328.415	310.058	314.515	481.101	259.811	207.286	184.873	395.735	284.339	202.239	245.816	345.582	228.254	308.942	314.148
P10646	277.971	141.664	146.294	143.458	273.172	215.982	190.863	113.262	140.3	113.352	189.29	190.93	180.27	204.5	185.408	213.841	204.5	345.941	171.647	122.154	231.782	179.53	186.149	176.292	189.813	336.034	195.682	193.094	270.772	245.784	399.318	278.061	326.919	237.827	230.341	328.771	145.563	227.001	297.901
P10720	3272.75	3460.51	2844.44	3370.29	7198.83	3571.09	5087.67	4431.47	2972.75	3619.01	3617.44	3244.19	3613.64	3067.63	3291.72	2123.14	3101.85	3466.69	3704.06	4285.01	3592.32	2195.17	3543.75	3117.86	3455.15	3422.75	4458.79	4636.02	7637.46	4811.67	5535.68	2871.21	3441.24	6082.88	3971.78	6072.53	3517.65	2163.34	4819.15
P10809	106.739	29.5743	115.369	78.7791	43.9203	58.1173	29.4885	96.5472	23.0752	128.269	21.6951	46.5053	53.8385	21.0582	64.2032	637.43	36.5385	39.0641	115.759	40.7381	156.067	36.9805	66.2884	20.8459	59.7253	19.6197	30.1759	22.8983	38.6215	40.1384	253.173	30.4118	28.3169	70.274	18.4111	19.7573	42.7407	52.2461	49.0486
P10909	18691.4	14075	14701.2	15865.2	18690.7	16880.6	23091.6	12816.6	16532.3	16811.8	15633.3	16195.3	20589.6	17136.6	16624.8	16128.2	19943.8	23039.9	23774.3	15485.7	15306.1	16567.6	15827.8	14959.9	16853.2	14247.3	16864.7	16434.7	18447.7	12430.7	13525.3	16791.1	22366.6	11826.6	16567.3	14917.7	14503.9	24622.5	21027.8
P11021	114.704	71.0171	89.0619	86.7583	80.5111	98.5841	74.7986	73.218	49.9397	98.9364	84.4338	88.1564	83.6686	126.315	84.8265	131.111	93.3479	110.12	97.5738	122.082	77.1963	79.6037	57.6288	64.4691	90.6573	89.0528	75.6203	91.1198	84.1039	63.2973	78.577	94.2185	81.1989	113.05	77.7417	81.2853	94.4364	152.6	170.496
P11047	404.325	472.978	373.123	429.062	399.532	545.682	383.402	685.595	1183.6	355.92	600.519	684.186	455.401	537.134	414.751	687.745	439.702	448.405	478.299	343.161	618.713	461.807	343.107	297.698	353.539	512.82	461.08	366.047	472.976	478.572	832.772	464.932	568.94	518.03	534.103	733.012	343.967	684.846	394.798
P11049	112.992	184.462	282.721	352.226	196.303	139.851	209.315	196.968	108.738	135.261	189.18	148.659	115.58	160.888	214.797	236.61	116.4	196.072	80.501	202.662	109.172	96.3657	198.046	165.179	108.419	123.469	136.742	228.45	197.793	128.62	127.039	123.509	87.2252	162.861	119.135	115.963	140.057	188.03	218.587
P11142	214.353	210.025	251.975	258.345	274.535	137.321	234.624	212.678	156.312	158.512	163.474	147.966	120.622	202.707	190.821	216.509	150.598	156.127	168.074	247.023	249.264	299.319	201.172	157.805	209.599	112.004	179.663	201.979	148.079	132.511	192.436	129.941	153.578	475.784	150.192	137.828	209.979	418.82	196.55
P11150	78.0126	89.1542	119.295	108.656	78.4708	118.415	155.355	72.3975	100.08	129.219	146.902	117.198	98.4258	95.6712	79.2282	95.5649	95.5452	84.4944	105.772	196.063	91.852	87.9832	99.6073	101.709	125.873	100.363	121.936	108.303	67.6779	47.6009	43.2931	75.0634	106.316	59.5982	41.8638	57.3785	74.2235	65.3504	165.909
P11166	151.51	181.612	157.424	187.966	179.372	190.85	280.5	163.519	156.928	116.537	173.04	89.3241	79.6668	125.394	147.926	163.557	109.178	113.711	70.698	246.816	132.148	153.27	165.89	169.532	105.293	126.309	161.499	200.092	159.69	72.4281	85.941	79.015	62.7145	951.819	98.7411	89.5394	146.859	140.366	182.287
P11169	130.844	84.1459	268.096	122.901	82.8084	52.8004	94.2673	122.284	43.7069	81.423	188.204	82.9317	38.2124	103.621	87.0722	126.447	93.1139	88.9195	76.3714	96.1404	144.762	62.5271	70.193	56.3641	63.9233	51.9345	123.962	97.2745	93.225	79.6062	64.2433	47.6144	72.9417	127.112	121.514	38.8028	183.537	78.5691	113.849
P11171	18.5002	18.3555	27.8608	24.0388	29.0676	47.414	37.0018	108.31	16.6219	64.7596	12.6673	30.5042	65.0313	29.1741	32.0367	19.4027	16.1323	12.1481	46.2067	48.1456	13.9871	31.2609	36.0234	41.2633	19.3302	26.2516	26.1626	36.7174	26.1869	9.94155	18.1878	19.2429	37.9979	221.072	24.9743	24.1845	36.7173	37.2625	58.0184
P11215	90.8699	236.277	115.893	93.0287	141.641	82.4297	135.919	47.4238	38.877	113.637	65.8993	94.4256	55.0653	121.684	45.086	140.028	68.151	90.4231	47.9643	56.7423	103.563	76.9396	116.112	60.0912	73.2129	68.1026	73.4829	146.038	95.4026	58.1402	73.3516	44.1686	39.1441	81.2393	70.2101	99.8829	117.266	115.928	77.6989
P11226	3136.26	3249.1	1036.8	1002.73	6082.56	6286.66	687.163	2143.57	1704.68	3074.62	3899.62	1150.28	4653.42	1077.33	329.034	700.756	441.332	3463.96	5441.66	325.451	3745.46	3837.44	1544.98	1450.89	147.708	8742.2	2493.4	1562.46	993.717	4705.9	1184.94	2575.81	997.998	2709.22	1370.19	5480.38	2381.59	10901.4	878.617
P11277	57.2806	45.719	54.1229	46.8968	86.2664	100.075	61.4582	29.6146	25.3036	44.5253	36.6404	62.0669	64.1696	63.7481	47.3964	53.8725	42.1479	18.2249	23.5387	125.097	48.3371	39.9189	56.4554	52.9383	44.367	59.8751	22.8455	31.7002	26.1945	57.3563	198.486	34.6599	57.4629	767.064	19.8022	22.7559	48.6887	41.6061	74.559
P11279	24.4865	53.8172	29.0241	48.7224	57.4696	39.2546	48.888	37.9205	22.5824	26.2746	51.553	52.0332	32.0604	69.1443	54.5834	21.0534	47.859	26.3084	43.1344	68.3882	28.8443	25.1832	55.5677	62.1145	31.4801	22.9965	74.6002	45.7512	90.6619	47.2622	42.5755	47.1968	31.8057	64.2909	37.2574	37.0093	45.4558	31.6601	48.3427
P11597	270.69	145.377	179.041	197.067	237.523	129.41	390.007	90.6138	99.1872	306.875	230.305	263.077	332.227	406.497	178.339	111.145	342.995	570.751	494.952	186.728	152.953	195.418	207.949	235.547	193.066	226.879	286.013	240.05	177.076	124.414	166.907	178.095	262.391	109.608	142.189	181.536	142.357	152.508	214.051
P11678	152.671	297.604	141.111	85.7596	116.95	135.321	92.6846	8.9147	123.173	105.188	50.1539	71.9173	74.3054	138.171	108.513	107.802	150.723	93.074	28.3011	40.8328	198.541	107.132	72.4179	51.6626	66.8689	84.5159	86.5587	172.627	90.7234	107.998	82.3739	102.866	90.0709	39.7208	146.312	65.9641	95.3253	92.0903	45.2021
P11940	95.5419	180.657	125.949	266.483	142.78	999.949	72.0427	119.868	404.719	190.112	564.028	193.891	137.696	225.852	74.2149	119.359	142.252	326.435	52.8444	135.808	120.961	43.2381	136.876	90.2025	96.1636	290.902	132.859	416.151	255.786	85.8869	53.2542	52.4058	124.793	127.719	72.9026	194.833	91.927	210.987	100.964
P12109	965.543	696.484	416.591	719.541	338.378	749.564	471.812	770.261	623.739	403.343	1254.09	568.458	616.023	574.145	559.094	690.517	386.929	481.076	484.477	584.008	768.203	788.169	632.154	652.559	573.593	813.419	489.432	576.497	622.875	853.816	671.157	660.381	536.344	493.109	487.814	807.974	411.333	539.307	481.556
P12110	1579.33	1236.23	740.956	1226.47	566.424	1194.71	856.111	1487.05	1136.35	663.103	2237.81	1111.9	1123.71	1001.7	935.067	1396.71	690.307	859.093	805.181	1166.72	1183.66	1384.15	1037.56	1018.63	946.979	1517.98	824.09	997.745	1017.49	1444.8	1151.19	1113.77	919.956	827.832	874.693	1264.26	734.79	991.684	781.667
P12111	1603.48	1203.33	804.966	1244.2	634.616	1284.2	743.208	1307.15	1042.69	731.084	1956.63	1022.78	1183.07	974.048	1122.35	1203.08	614.987	911.412	966.358	1090.97	1362.43	1369.56	1184.57	1120.41	996.214	1260.75	800.229	1060.87	1067.78	1324.62	1211.37	1025.83	871.761	913.003	723.298	1204.78	707.573	993.266	771.978
P12259	790.317	626.289	805.127	1031.2	1308.41	936.573	642.02	944.759	615.687	799.183	907.627	1061.57	2024.24	962.105	833.022	1031.18	933.638	1567.61	1007.54	915.587	1248.74	991.568	853.322	926.577	1303.77	1331.58	996.426	777.331	959.41	1152.67	1814.35	1470.8	1371.52	3191.77	1684.41	2025.02	1226.68	3564.01	2180.66
P12429	100.638	157.252	336.796	207.143	120.228	60.0101	70.4989	161.135	94.742	58.5556	421.985	55.9706	25.8715	167.718	84.1919	165.986	158.313	165.945	77.3702	35.8624	127.36	101.212	89.0978	90.8907	62.7465	46.4294	245.153	217.228	228.999	83.2717	46.381	34.3655	82.6484	90.5361	191.398	73.8983	102.325	26.7208	96.9807
P12814	30.7148	54.3155	72.2114	49.3359	53.6276	26.2655	46.9008	35.2725	18.0719	34.4068	36.5777	104.834	46.1807	104.331	47.3472	55.2748	150.544	45.8978	130.967	69.3683	21.3078	93.4932	32.6289	31.5131	31.5183	26.0466	37.8251	34.3493	52.7887	21.1312	26.9915	41.7223	57.6774	291.784	63.3029	45.6625	84.822	55.1438	53.455
P13224	657.641	635.821	1057.05	499.633	616.377	236.323	635.714	592.569	286.464	307.38	898.584	332.436	323.006	985.425	700.61	608.524	711.271	846.809	478.671	681.279	649.703	568.727	735.569	544.725	343.448	285.656	787.099	479.775	1517.55	434.222	234.328	400.923	786.958	2185.78	1173.18	646.122	2074.8	935.405	1261.4
P13611	221.153	462.588	402.128	497.588	743.626	660.569	342.806	747.455	741.902	433.6	486.238	332.058	257.047	381.644	207.784	605.1	284.166	360.928	230.119	223.994	354.883	572.12	417.354	463.943	365.861	427.31	450.695	441.759	597.359	360.349	530.967	307.209	216.954	300.438	451.906	574.105	402.44	453.274	246.34
P13639	41.9511	30.9762	44.8698	22.3537	16.228	14.9286	15.6642	80.8812	6.29227	55.5998	22.7594	52.112	19.7157	22.1947	25.1732	266.023	21.4686	15.5415	71.457	13.6207	52.0919	34.7229	22.6815	6.1914	30.5198	18.9288	9.70217	35.0842	29.4746	7.0397	104.881	17.2959	10.8935	26.7905	32.1285	31.987	21.7894	22.023	16.007
P13645;P13645	2774.35	2152.34	4501.36	2208.47	441.819	385.348	502.452	904.377	1121.17	1939.47	1328.26	761.554	2868.2	507.22	2431.55	370.42	347.65	1208.51	2142.37	1369.66	1276.01	653.708	1965.28	2222.43	2445.28	1185.63	866.875	715.202	805.279	333.851	427.318	2240.17	705.308	417.171	1918.24	502.994	1422.07	730.857	597.996
P13647;P13647	233.34	181.249	343.426	228.523	52.584	57.0677	95.0594	137.595	108.842	150.651	160.064	111.945	385.097	88.7573	288.773	50.9967	55.2565	93.0449	278.218	140.579	220.212	85.003	169.021	196.454	258.923	130.368	124.179	48.121	123.858	53.2521	83.3198	161.369	119.349	65.6038	103.758	40.3231	210.801	113.812	86.7556
P13671	334.927	714.518	903.008	624.145	958.8	441.926	728.514	863.861	647.011	554.561	377.277	744.317	467.908	620.427	457.56	859.381	815.446	594.812	743.666	481.499	309.606	290.032	318.845	359.849	354.483	311.85	339.042	483.404	252.865	238.321	298.408	340.764	365.357	230.632	261.568	304.304	197.923	247.177	261.384
P13716	46.9875	32.7023	32.134	21.7582	45.3938	33.0275	36.7461	15.4529	15.7533	35.4741	35.4058	51.0066	34.1591	48.2696	35.8875	15.7796	63.3792	59.9044	31.9501	56.0231	33.5257	49.3761	11.135	17.7868	34.512	22.7699	42.4434	19.999	29.4531	25.9862	40.7538	37.3701	26.2797	70.9214	14.1222	38.0815	44.5276	37.8847	31.0864
P13987	250.228	238.24	188.162	283.965	265.384	197.55	275.945	193.782	159.05	209.588	155.861	113.549	169.879	163.231	175.514	222.235	141.962	172.474	238.256	263.688	166.466	191.743	286.968	289.745	232.993	197.193	208.152	184.74	237.788	207.533	161.162	210.741	310.966	425.187	213.606	138.422	267.095	203.985	402.951
P14151	339.76	240.833	379.336	418.465	312.366	220.201	277.369	208.543	172.734	493.24	320.717	260.551	312.681	297.874	268.795	310.593	292.821	480.541	352.563	236.967	476.128	169.395	503.172	555.322	451.783	265.226	510.163	511.395	549.084	311.72	257.892	500.298	621.216	264.245	330.537	206.92	466.891	478.182	505.374
P14207;P41439	6.93039	5.69548	15.2217	9.15502	14.3127	1.37942	14.6909	6.95372	11.8537	9.06591	13.5308	8.47637	3.74448	6.05055	9.60405	3.65173	5.33326	6.64248	6.23136	20.5116	12.3031	9.10298	8.14102	13.3446	8.30383	2.59894	8.5993	13.8504	11.8177	7.04638	16.7298	11.6416	9.37152	5.92265	47.0694	13.1848	6.27776	7.13757	18.5308
P14209	315.249	361.988	344.778	478.573	476.094	187.639	326.234	355.348	250.143	366.583	263.884	262.473	248.819	241.54	193.014	461.923	188.354	213.312	134.272	186.252	390.541	309.24	170.189	138.453	332.082	174.829	180.855	264.578	273.533	191.105	304.797	183.781	123.942	348.172	199.123	159.347	254.451	362.322	251.703
P14543	498.291	602.407	425.035	532.99	536.417	625.262	502.625	723.793	1190.21	416.983	705.949	690.543	532.972	617.01	463.087	730.203	534.79	534.154	482.947	407.151	649.198	532.456	434.417	474.379	452.737	607.137	582.584	413.988	563.886	561.491	779.608	600.565	661.321	549.885	574.25	743.177	409.238	703.297	462.679
P14618	60.5456	70.5468	78.1307	43.9231	66.3977	45.8841	73.529	65.0983	50.0793	56.5514	57.1665	56.2689	46.9293	79.9494	54.2872	59.6016	69.2631	46.0619	78.6486	70.3784	66.4038	89.0701	59.9297	64.5516	43.1655	42.409	61.3177	55.2191	64.69	43.8524	86.9083	51.7675	69.442	244.238	82.1411	63.3719	93.0152	79.0943	90.4566
P14770	97.2939	120.152	220.495	81.0584	155.239	53.6134	135.239	125.302	41.6002	56.5085	164.265	58.7012	88.0683	165.096	128.778	171.273	135.364	187.419	78.7086	155.643	127.652	97.5031	106.553	86.3071	61.2684	49.6186	113.162	76.8223	283.226	62.9356	79.3932	67.2811	182.707	404.378	188.811	139.068	418.113	187.986	272.666
P14923	6.09822	38.9269	50.6631	7.46891	26.8124	11.6144	36.1526	44.9668	21.8916	22.9166	32.555	40.0632	81.3891	19.882	47.5713	21.5222	45.835	23.9195	35.3902	25.8695	15.2209	24.365	18.3673	16.3539	12.3728	8.54453	19.7679	31.0316	7.53983	18.4571	32.3335	32.3663	22.7103	7.06691	24.573	13.7255	23.3358	32.555	5.76759
P15144	344.153	406.792	544.293	1111.01	2901.87	425.5	310.009	140.918	584.69	401.972	269.251	364.478	280.656	158.242	434.932	363.273	320.432	429.759	225.567	344.395	188.708	182.949	471.644	431.018	713.385	356.666	224.19	353.972	198.264	219.937	152.304	262.738	335.995	193.478	158.208	206.083	308.208	287.985	609.65
P15153;P60763;P63000	161.917	127.644	228.955	152.932	218.74	78.5646	188.793	112.205	72.4041	120.807	143.265	85.9891	163.53	82.8612	173.319	109.63	129.059	125.318	129.464	151.452	102.92	137.935	131.935	163.689	136.462	44.2652	128.389	138.862	120.721	124.605	130.661	96.5739	160.258	199.196	265.306	189.096	209.609	160.439	246.833
P15169	101.208	73.2041	110.657	244.177	156.781	147.326	125.651	166.792	123.551	121.766	81.8183	137.552	131.174	141.643	102.952	126.494	78.6289	145.254	107.936	105.78	123.077	78.2851	114.76	109.287	114.244	116.848	104.967	114.234	132.763	187.126	126.499	117.058	107.555	179.298	84.638	144.814	79.4677	602.957	109.172
P15814	81.6231	81.2499	134.045	119.48	87.8551	64.8036	98.9424	115.822	130.212	104.984	76.0928	96.2163	90.8233	58.0426	77.4348	99.4887	87.5249	81.6652	66.9602	78.0228	69.0337	74.494	74.5765	74.5765	51.5438	71.1092	67.3848	69.9191	72.6355	62.2801	81.563	65.7348	49.1588	72.7147	57.2782	69.6639	70.7507	131.889	80.2149
P16070	108.554	113.365	116.456	106.442	89.5487	54.4442	152.786	78.1268	49.8999	88.1105	111.112	73.4042	38.445	58.6117	97.1795	81.2969	36.842	82.4144	91.0086	34.7089	133.474	32.0096	90.7222	72.5157	72.223	51.1655	62.0948	76.5578	100.853	49.4842	94.9713	51.5266	71.1069	141.025	39.5904	93.3574	108.048	93.8628	100.219
P16109	129.747	120.71	183.462	153.291	121.078	131.391	109.906	115.725	103.57	115.55	183.282	92.1858	92.7247	158.503	96.9392	98.5458	124.583	158.615	67.31	67.3904	166.291	124.306	103.724	106.097	80.1982	120.183	145.693	112.347	227.953	83.9644	84.6268	100.743	102.307	202.801	129.2	112.131	138.443	110.769	107.325
P16112	137.998	283.964	150.808	144.463	68.6083	262.844	88.2412	269.348	270.403	147.398	266.04	174.506	212.647	258.579	138.549	326.186	269.919	157.348	89.0099	122.804	150.14	136.943	166.503	161.73	110.548	296.576	190.725	189.831	192.158	169.606	181.148	133.485	85.8863	125.235	152.645	230.517	111.734	151.786	80.4801
P16157	58.2363	63.0869	54.6474	61.6869	61.4478	83.7828	72.366	42.0778	51.7602	48.4028	43.6493	79.8793	32.1295	35.6445	75.1567	48.4023	42.4913	40.4559	44.6491	84.8419	53.355	55.4929	52.4025	46.1284	57.0916	56.4399	45.6639	50.4196	37.7285	108.367	73.4331	45.5234	22.7543	397.111	21.9383	40.3116	44.0195	48.5177	63.7228
P16284	372.614	382.019	492.494	486.469	408.847	214.697	330.4	412.721	251.525	161.462	472.989	286.765	207.505	407.453	301.873	348.321	306.088	417.816	353.052	307.75	333.938	381.804	470.435	375.82	280.944	217.253	363.765	185.345	717.118	274.063	214.266	224.827	299.72	593.521	408.759	343.156	545.859	582.925	479.866
P16401	81.4568	68.3931	33.9202	54.8089	41.2629	54.2028	56.0994	61.0602	61.1481	64.3253	23.2625	59.1118	75.9937	63.9517	51.9733	133.787	74.9469	25.5201	139.328	25.3072	59.2037	47.7765	25.5115	31.3844	44.1475	67.7864	29.6827	222.303	22.4322	43.7647	22.6499	78.9275	73.2132	65.0399	74.0181	30.1935	9.71018	60.1316	29.4232
P16452	287.529	204.013	177.311	206.36	276.891	393.97	246.001	86.2462	99.4538	248.591	171.345	227.751	175.973	265.538	395.105	202.475	301.095	242.493	808.995	513.518	5603.21	248.41	391.383	332.158	270.799	239.951	138.329	405.447	241.95	854.784	647.21	263.7	139.663	3776.19	251.611	479.875	233.623	187.53	279.421
P16473	15.4392	20.857	8.11721	8.20544	8.64757	15.9305	16.1833	15.8555	36.6284	17.3087	17.0974	8.17251	11.3633	10.2067	16.4984	17.0344	6.2174	18.2625	15.222	13.4087	29.1935	20.419	29.5324	26.4937	11.2842	6.60334	23.5179	33.4441	13.2154	3.76588	15.4139	17.4777	17.5828	25.6083	12.3081	37.8264	2.89923	8.98973	3.20298
P16671	219.022	464.093	351.596	184.765	303.459	177.74	338.631	115.152	191.379	221.226	496.71	97.3064	233.739	329.676	286.811	308.889	267.029	479.183	227.932	229.192	341.352	333.361	305.24	308.557	202.266	177.922	331.728	221.673	95.2856	235	75.7728	239.422	334.168	459.996	371.281	268.872	197.552	437.482	412.531
P17301	55.7085	72.0756	45.4947	46.5672	56.4796	57.1872	49.0813	64.9214	27.7423	37.315	64.4148	57.9223	54.8246	78.2279	82.9565	66.5075	75.6992	78.1888	40.8922	34.8411	100.165	36.0441	41.1918	34.4369	41.3166	40.4265	59.3695	65.1981	64.284	80.0577	37.1527	49.6142	49.3649	89.6588	50.5543	72.4462	84.5934	98.8991	93.3278
P17813	48.6542	46.7144	44.982	94.7787	77.2866	34.9862	56.9272	41.9225	18.8661	36.939	31.6659	19.1941	24.6162	17.0168	27.9635	22.5864	25.5515	31.5737	24.5289	34.9939	30.72	48.4506	64.8694	46.86	40.8228	11.1378	35.7419	18.2864	39.9275	33.0526	19.544	24.2832	39.1107	59.8782	31.8662	17.1198	53.3454	41.8591	64.7892
P18085;P61204;P84077;P84085	79.273	83.1147	224.407	108.649	175.563	64.1477	170.571	72.14	55.0824	64.5298	102.368	102.906	86.0994	93.0056	89.882	63.7911	85.3796	144.913	139.804	134.58	140.093	131.85	107.028	39.9119	86.614	64.8464	91.64	40.7171	85.2869	56.0659	80.9704	62.9938	80.2781	172.945	123.777	95.1857	180.821	118.071	118.088
P18206	64.6525	67.9096	140.007	55.6326	66.9669	23.8224	75.0966	74.6871	50.2005	50.537	87.7832	59.7613	50.1176	138.968	99.1618	55.0837	95.0116	71.7894	57.9476	105.886	76.6486	72.6699	66.8788	58.4157	63.394	45.1578	78.5171	66.5451	85.1122	64.5422	137.575	49.5632	99.8802	435.449	102.489	72.958	173.94	139.588	133.945
P18428	1338.48	875.46	1780.72	667.266	3433.11	1774.71	2703.09	396.997	1133.85	1774.81	1531.11	802.241	1657.32	1090.03	1556.17	829.859	665.862	2889.27	1548.17	823.891	782.423	1065.9	2365.14	2225.61	1446.43	910.27	1428.6	1680.75	868.105	1118.45	394.227	823.196	1688.1	549.884	361.826	1605.03	964.043	518.557	1332.81
P18577;Q02161	60.7329	78.0147	41.6	58.9086	69.7189	85.8145	62.9819	76.7867	52.5621	55.8703	45.9714	52.843	53.6809	163.67	32.8005	44.8116	46.9688	59.8339	45.308	128.306	44.7156	111.97	56.4737	55.4203	57.7237	45.8266	52.0386	68.5513	36.6229	50.0203	197.701	163.284	51.6332	621.223	52.3689	146.502	36.9551	20.7503	34.5841
P18827	220.398	123.838	81.8848	100.091	201.512	315.966	61.5542	167.665	190.467	277.178	108.705	91.3435	58.8024	72.4297	28.6523	132.4	67.2564	86.8962	102.599	111.349	132.106	92.9438	127.238	179.122	101.881	191.828	77.2523	71.349	283.841	99.5286	381.374	122.305	105.142	161.16	92.0561	178.261	117.703	345.336	86.5906
P19320	58.1195	66.6774	71.4294	63.2626	51.8517	72.5427	78.0357	65.5525	57.6046	34.6597	60.2775	64.741	118.73	57.9597	63.7662	50.3294	40.9933	65.6929	53.2583	45.8216	91.8726	66.1806	80.3974	33.9779	53.9908	41.9582	37.6306	61.2422	63.4106	58.9908	68.4003	57.8215	67.1762	50.6668	74.2519	83.3183	68.6825	67.5217	59.9719
P19440;P36268	110.093	138.294	204.939	458.143	1219.68	156.977	103.147	34.6167	151.004	162.702	68.6293	68.7688	58.2799	41.4949	152.588	113.543	107.994	92.5499	54.9201	78.1428	55.1342	68.4735	111.799	109.486	311.497	125.11	94.3693	151.977	60.5611	61.4695	41.8731	56.3559	65.62	59.8236	28.2498	55.166	117.333	112.678	131.71
P19652	3474.62	3233	6577.9	2263.75	2816.67	1621.41	3065.17	3823.43	1227.63	1440.07	2192.88	5481.02	2034.12	2091.74	2774.74	2677.48	2845.76	4819.36	2747.04	2942.98	2350.5	3644.86	2194.6	2468.45	1703.77	1143.78	2916.84	5567.2	1717.73	2761.13	3674.36	2161.79	2152.88	1919.86	2602.07	2036	1339.37	4266.29	3073.68
P19823	482.749	692.498	496.983	648.269	586.073	657.553	1156.34	1000.14	930.204	732.577	892.653	813.071	659.671	824.415	705.635	902.423	656.837	574.098	720.813	799.034	544.16	509.655	515.521	491.448	508.709	660.901	606.395	653.714	523.564	659.386	614.786	807.829	580.282	1141.39	526.253	802.545	561.894	858.525	624.887
P19827	101.246	237.113	117.618	192.62	153.146	183.157	267.209	200.798	222.363	163.024	257.916	188.43	174.304	180.454	186.575	269.877	174.32	158.19	152.414	206.441	112.74	123.931	132.321	124.581	125.093	140.372	150.904	146.905	147.52	157.704	140.871	174.504	100.915	259.502	87.5411	165.65	137.766	187.538	170.222
P20073	168.055	132.572	518.703	286.857	108.663	65.1782	152.522	145.491	156.772	97.6918	519.431	97.5691	39.0527	226.957	95.7412	168.497	150.923	176.461	127.34	60.1135	139.646	172.678	89.3893	101.218	97.0952	70.1545	302.839	293.8	298.126	50.6963	60.3116	46.95	68.2557	159.311	290.503	84.7533	135.989	25.1874	182.539
P20742	87.58	70.7304	132.108	104.566	44.3821	46.9481	181.353	343.762	233.752	228.134	246.751	722.468	297.352	40.5327	251.71	464.743	1056.91	645.739	66.7064	258.506	531.115	368.935	161.515	123.383	321.57	82.3702	503.184	801.26	251.315	542.309	391.847	749.34	375.232	1285.67	273.36	207.236	135.977	216.214	110.025
P20851	17756.6	17098.3	20833	22381.8	17461.3	15621.5	13961.8	14772	16053.7	18005.8	9767.15	8712.05	13599.4	12902.3	15706.9	11809.3	16285.8	17798	21243.4	17661.5	22087.6	20526.7	24881.3	22983.9	20640.2	17214.3	22677.8	17951.1	14613.6	22434	20116.3	18081.1	17030.2	17669.6	20664.3	13744.9	15160.9	12645.4	22693.6
P20930;P20930	18.2291	11.1357	12.6535	15.4266	14.3332	12.0669	23.5492	11.7331	23.1833	14.8855	14.227	17.6839	39.0509	2.72522	23.9718	12.4237	18.5658	12.3313	14.4278	31.085	53.0904	10.108	34.1339	23.6273	43.9026	8.42258	4.73301	14.1732	6.56432	36.0583	22.8847	19.6054	28.0557	10.3382	14.0809	11.875	22.5291	15.2169	8.08621
P21333	195.618	278.453	382.903	151.393	223.425	126.061	286.849	214.196	138.121	117.636	259.828	211.848	128.67	508.493	334.547	270.427	418.125	263.885	179.26	468.798	244.966	316.356	223.547	219.984	146.04	138.568	300.124	252.61	364.241	240.816	115.901	207.518	382.001	1496.2	418.039	342.671	863.7	523.052	594.195
P21589	100.55	26.0378	46.6454	96.4596	192.951	28.8691	26.4258	11.0483	95.4356	59.8868	31.8031	36.2417	13.9071	5.64851	40.6092	43.4756	31.965	47.0102	30.0051	30.3418	35.2581	31.8943	48.8993	48.9502	47.8505	33.5671	44.8857	91.3827	22.5127	32.3364	25.5314	27.2677	40.5367	49.9383	16.6104	48.761	20.1399	37.9933	72.8073
P21926	359.21	429.632	688.576	718.485	410.858	180.102	391.543	553.597	326.977	278.736	892.165	296.908	239.551	561.768	356.438	481.333	443.531	700.349	369.857	250.959	418.053	284.202	279.018	263.373	187.672	252.103	554.263	732.709	987.746	315.217	233.961	220.029	247.469	434.562	484.344	233.956	334.629	565.934	379.02
P21941	152.518	2.90587	3.21002	6.8418	5.25827	1.50985	14.8357	25.9171	19.5513	119.666	6.01671	1.3918	1.03246	18.5979	1.34741	2.54883	16.4428	9.03634	80.738	72.6049	23.239	1.41417	10.2219	10.6221	3.94566	117.275	2.19195	1.84319	0.906515	26.9935	2.07717	16.2573	2.17385	2.1568	6.76762	38.4959	259.171	36.3404	3.55296
P21980	26.6047	69.1059	7.2792	22.5672	44.4722	29.3992	77.4807	31.0651	58.7314	32.8134	38.0287	42.1824	70.7567	109.81	53.9992	40.1595	78.1777	36.2324	54.7722	91.6195	65.1027	98.934	47.1465	64.5416	52.0046	110.489	29.5644	46.3454	55.5759	28.3572	50.7421	68.0304	66.7745	71.1879	45.0668	82.7037	66.4537	10.2124	86.3881
P22105	66.8192	81.6655	83.6706	58.2987	46.6154	113.47	105.781	107.673	97.9517	91.3055	167.424	127.34	164.433	165.795	118.169	110.674	186.658	107.052	69.5252	80.5915	89.2319	69.067	63.6006	72.3934	51.8062	208.542	83.7231	131.09	100.707	90.2478	133.172	219.182	135.421	98.6126	122.89	186.989	99.7389	94.3497	92.2676
P22352	101.48	95.0961	81.2618	69.008	236.651	260.639	76.1477	162.818	125.507	116.781	73.4427	180.442	70.4462	125.931	101.623	87.2193	121.062	96.9783	91.5262	76.1683	90.1356	102.561	42.5011	66.5324	63.0768	74.8669	58.0577	162.859	58.3998	88.6385	72.28	40.3034	51.3742	103.178	97.618	79.1657	106.359	142.993	79.7047
P22748	118.31	107.305	50.6861	96.1969	30.2377	80.2151	100.87	45.5676	41.0386	82.3308	43.7857	41.3946	36.7601	58.6261	103.424	140.579	66.9705	96.2045	97.2293	75.4657	73.0872	65.3312	119.641	121.668	89.8279	70.087	59.7542	197.175	75.3908	79.9639	150.58	57.3782	65.9951	90.197	58.4266	96.4992	82.9692	43.7994	113.397
P22792	221.694	222.144	291.299	355.508	223.569	262.286	214.996	378.171	214.945	256.745	264.962	229.07	268.802	222.002	219.59	275.186	198.545	342.096	297.919	288.116	245.602	135.787	206.854	297.954	229.887	242.077	266.226	293.812	265.546	311.175	212.042	284.523	258.048	293.772	248.823	267.102	155.282	762.136	357.486
P23083	473.559	1443.85	680.145	1125	2160.1	1563.68	910.337	2276.31	1967.59	1096.57	683.441	2108.54	1498.56	417.105	1243.68	732.529	831.358	714.228	498.675	566.128	1239.4	2490.79	719.152	707.317	658.231	596.916	395.782	374.557	255.458	667.512	1531.06	566.399	541.309	422.606	326.284	302.592	335.176	1059.53	564.685
P23141	228.782	64.6231	102.065	129.405	77.7701	119.265	139.318	62.1275	38.5786	128.303	86.3906	58.4035	144.338	75.0178	120.835	79.46	104.466	129.176	128.948	77.5242	174.915	130.859	173.536	185.05	283.548	93.4304	148.569	144.939	96.004	90.5765	88.1718	128.746	174.418	65.6277	105.657	77.1893	130.163	135.023	202.39
P23142	268.249	290.376	231.069	453.454	582.239	389.027	391.741	536.772	485.28	404.566	406.913	359.249	265.708	360.692	216.734	391.923	234.095	248.446	367.431	339.604	311.18	363.427	278.724	247.117	304.074	293.211	306.48	245.426	338.69	243.45	349.367	291.992	208.564	234.284	274.859	438.61	305.518	432.253	223.978
P23229	214.59	228.009	403.495	194.245	212.57	94.203	282.365	294.642	166.38	152.614	363.154	201.797	176.618	423.815	201.019	238.76	221.927	434.988	226.328	173.731	155.895	163.407	234.513	186.963	118.095	144.081	300.711	256.513	529.21	159.446	122.985	138.174	190.874	361.62	270.973	215.556	339.219	606.219	280.61
P23467	66.2867	93.5242	60.7037	57.3266	35.1316	46.2315	48.1713	62.9364	35.215	36.0456	47.8944	51.3065	39.3036	35.2236	44.0447	49.6935	44.1903	55.4085	44.1162	53.132	47.6406	30.4847	76.8971	68.9898	47.4965	39.9986	55.4435	41.9675	89.3152	90.4639	49.2483	43.3244	42.661	68.0493	48.3611	71.0364	56.0638	80.7695	59.088
P23471	101.76	99.9522	66.1516	113.225	52.6802	112.858	69.8614	123.075	169.052	86.9443	89.9074	149.387	99.1361	144.518	56.2036	123.981	86.9129	82.4687	50.0123	74.3983	123.01	103.885	100.753	102.53	86.6393	168.401	79.226	62.9838	158.148	93.727	134.209	100.123	103.563	132.326	131.911	164.997	87.1291	112.55	84.2623
P23528	45.0968	54.3596	99.8849	33.0651	39.8923	20.8998	75.5716	61.1936	24.7181	24.9652	49.0161	39.0138	25.6716	93.5042	63.9241	71.5225	88.7281	55.4085	53.7452	113.878	53.93	61.7702	53.8732	43.9304	28.1727	23.0676	63.5487	38.0846	77.4601	25.9375	52.8865	40.7939	123.346	514.31	118.31	69.3674	242.03	91.6861	147.883
P24043	312.961	387.427	306.15	328.188	309.635	380.414	276.42	536.324	949.357	276.771	431.011	494.193	301.083	368.504	299.878	485.821	305.341	297.453	333.84	254.56	473.19	333.382	267.434	267.819	291.136	363.892	319.661	294.672	347.054	366.878	560.098	353.219	425.369	335.71	320.911	501.361	262.645	468.155	266.678
P24298;Q8TD30	85.2842	62.6509	52.1514	38.5557	227.453	91.1355	49.155	54.0045	62.8551	105.819	243.628	88.535	36.9733	136.386	39.923	40.4141	52.0215	29.5347	21.7686	43.0791	81.1173	78.2997	185.318	95.1773	95.1773	222.103	20.2588	51.1853	97.6581	87.2596	31.0526	155.237	82.0971	81.5336	45.4634	234.508	233.749	101.929	66.8907
P24821	2238.17	2730.24	1528.14	1674.64	1579.41	5102.7	1937.9	4733.73	5541.98	3018.41	1920.46	3191.51	3977.11	2431.15	1767.31	2697.61	3258.74	1913.37	1754.32	1807.58	4007.43	2110.96	4366.81	4532.34	2679.98	3884.27	2747.29	4446.64	2386.81	4830.35	3942.41	2779.44	2766.04	2193.8	5448.57	3418.32	5743.14	3390.49	1987.73
P25786	27.0704	25.0689	39.4226	31.2822	25.0193	38.1638	104.776	18.1983	34.9749	17.0393	19.2452	27.0074	51.3871	29.6988	24.9043	15.4619	19.245	17.7453	4.39552	32.4052	27.8902	86.0389	21.643	34.4894	21.7899	29.0649	23.502	37.3374	17.1889	24.4251	53.9896	30.8535	32.7144	68.6855	27.3487	25.1677	23.7573	129.436	22.7955
P25788	60.5414	43.1006	60.5414	28.2624	25.2416	40.796	78.8186	11.6209	42.3059	32.6167	27.5857	18.3144	44.0416	32.6406	63.6282	22.2209	47.6663	25.2416	59.4446	34.7814	50.6371	68.0244	46.9892	62.2399	33.6891	62.3909	57.2465	73.4215	43.1006	14.7357	21.1013	44.3158	66.1017	32.2739	48.1434	43.427	51.1962	68.1333	53.3551
P26022	55.4558	108.286	41.5427	81.0185	89.2218	55.356	55.8888	169.125	128.643	96.4079	49.7665	81.6911	77.2286	77.5856	45.1077	98.3931	48.4696	45.1066	52.0596	53.6677	54.2929	58.4651	37.1991	67.6477	30.5053	73.0499	76.2743	114.224	43.4018	39.1653	91.1222	45.4595	12.544	34.2767	54.3695	50.6752	44.3796	98.2622	24.2926
P26038	133.357	161.343	138.848	141.53	96.1381	88.0261	139.553	79.4394	100.007	68.2045	91.9998	62.9563	59.4398	87.5693	117.709	85.5659	86.4691	77.1478	77.7915	143.954	154.272	95.0181	182.778	184.938	117.065	95.8677	109.831	88.5732	130.701	138.654	85.5354	75.9426	134.987	275.766	149.485	117.804	175.697	143.022	224.332
P26927;Q2TV78	36.2168	20.442	35.0354	35.3055	29.804	40.9877	51.0554	32.2033	24.2247	27.1417	27.1312	43.8202	36.6746	15.6934	26.3691	31.7864	36.7741	39.1267	35.7742	46.8097	57.9892	33.6747	33.8249	29.9697	20.7996	29.0076	20.4626	33.0677	26.4817	35.6377	63.5964	29.0811	25.3064	15.8381	32.6098	55.0754	27.0407	27.8503	39.0613
P27105	263.39	552.771	361.355	317.812	468.612	168.656	377.781	172.933	261.892	203.903	416.117	176.226	140.204	422.534	269.454	317.552	232.144	214.574	247.464	427.761	350.738	527.441	321.649	332.458	292.18	180.982	489.297	245.644	514.104	257.658	108.456	206.66	212.362	710.533	418.395	224.969	484.678	175.768	501.84
P27169	3143.04	1079.37	1532.37	3179.74	2192.56	1365.48	3361.3	865.684	839.795	2464.34	1178.77	2325.33	3296.01	3676.4	2931.35	1844.33	3965.98	4697.05	3140.14	1613.89	4952.89	1169.82	2526.01	2274.61	2194.06	2168.66	2066.84	2558.76	4222.99	1385.34	3074.88	4990.5	3406.59	1576.65	2535.47	2257.11	1648.09	3046.36	3997.07
P27348	34.2675	10.4167	38.385	15.8841	5.97014	13.2412	14.6932	18.514	13.8768	17.4432	9.9084	13.4224	7.20261	18.8084	24.8809	22.2653	23.1028	3.97116	13.42	18.1105	18.7272	9.52388	16.719	11.4393	17.0615	15.0833	13.5529	18.2872	15.2326	11.3618	18.4673	6.61836	17.3462	82.1359	16.8911	12.1765	29.1959	20.183	16.7158
P27487	52.6721	66.8721	62.8342	81.2267	204.078	20.2862	38.7315	72.2934	66.1194	71.7954	44.5147	50.7743	57.4539	61.8301	88.7968	24.7465	41.9987	76.3564	58.3201	22.8283	46.2096	53.5445	6.16335	45.4092	103.057	54.7088	47.2975	75.531	41.2614	30.1851	42.1082	47.95	60.774	5.60529	64.2114	32.1363	33.6975	184.283	25.8218
P27708	5628.79	3213.65	8682.39	4568.33	2910.77	3678.84	3451.42	4319.32	4983.37	3155.39	1622.47	6724.32	4023.05	2344.96	4698.84	2388.35	4464.44	853.256	959.101	5837.85	2702.79	3769.97	1135.26	594.964	2428.5	4659.7	1666.64	7186.99	1919.25	2732	4653.43	1640.69	4194.36	1692.13	3480.67	3329.66	1240.31	5690.52	1144.93
P27797	68.0814	56.4862	26.6383	30.3868	44.2353	59.8075	39.1698	26.7988	23.2077	39.4	37.5986	28.6813	37.2881	42.2187	28.3761	62.0104	52.5186	35.6821	70.9034	36.7525	66.6299	25.8361	40.6297	45.5972	48.9087	36.2008	43.4477	27.8301	45.0049	45.9723	67.4392	45.687	89.0379	85.2605	44.5249	39.6028	39.9801	35.4287	51.4034
P27918	2488.21	2388.7	2030.46	2126.11	1179.59	2469.6	1501.85	3186.88	1827.05	3209.28	2624.71	2275.24	1423.47	2500.83	2824.99	3224.44	1942.28	3629.48	2345.87	3326.67	2583.59	2081.01	2469.54	2173.12	2086.73	1905.99	2845.68	2340.36	1844.11	4152.49	3229.35	3214.52	2356.89	3442.14	3488.92	3070.47	2453.86	2493.19	3118.47
P28066	22.3426	32.6224	23.5086	13.3977	58.9399	1.65391	49.8333	20.1753	4.91182	13.1683	18.051	18.5839	16.5499	19.4053	17.8023	19.4559	21.3632	9.11797	4.27288	17.5881	56.3614	30.8271	21.8084	18.6176	3.3242	11.9317	20.8813	23.135	27.6374	20.843	3.38017	14.2099	20.2887	6.61325	12.566	16.7057	33.7982	15.1882	16.9965
P28074	22.2115	16.7042	41.2648	7.66304	9.07418	17.7473	43.9263	5.63584	4.3603	4.01154	11.1263	47.4443	11.5622	13.834	4.59526	18.2621	40.6783	7.05915	15.9188	10.373	8.16265	10.8979	4.25576	18.6312	8.5089	3.54102	5.56929	25.1711	16.1492	15.8008	168.708	6.88281	14.915	17.6315	6.81011	10.1239	8.5089	33.9896	24.955
P29622	97.726	76.6386	96.3958	89.2621	72.5768	78.6741	124.208	61.9668	46.2709	78.411	71.4389	87.1015	80.795	97.0847	121.429	61.8765	101.021	90.3591	76.0498	80.4303	86.364	76.7652	108.807	92.3679	104.183	74.6244	79.1423	83.8333	77.1981	60.2346	59.2607	85.0483	131.757	67.2584	86.4722	74.973	71.5803	85.0532	163.929
P29972	75.8976	111.729	64.8337	66.2442	65.3851	53.905	73.1665	37.1642	67.5684	36.5455	57.5889	28.9012	27.0322	33.0608	74.7653	49.6598	60.0697	39.5699	21.6479	58.4665	71.9169	66.4068	97.2094	80.3493	56.1879	40.0456	81.1056	12.6992	58.6899	65.7716	30.7288	25.1591	50.9218	192.678	50.408	56.2285	49.3497	26.1247	75.1156
P30101	92.4576	65.9694	72.7914	72.9141	76.0856	88.8199	58.6167	57.5479	44.9478	61.8596	58.283	57.1953	73.6642	53.7914	71.5515	76.3485	58.3734	64.2327	67.8894	63.5986	66.4496	78.5677	69.8472	42.3019	80.538	68.1717	45.1129	47.8941	70.1547	55.0164	70.1624	55.3999	67.5674	110.424	58.3203	59.156	86.4166	80.5286	73.1316
P30273	134.898	108.844	319.601	223.829	179.778	63.1129	108.498	188.573	106.047	103.133	108.944	105.079	91.9773	87.5103	119.17	162.824	69.7079	100.559	110.19	93.1461	189.448	113.74	94.0271	154.782	42.0987	108.849	117.539	152.248	210.997	115.402	76.2331	51.4871	65.0453	175.967	165.225	100.461	157.312	293.932	139.437
P30626	198.068	153.011	490.766	317.488	173.523	93.9716	206.721	233.464	164.806	130.676	497.719	111.34	75.2428	243.706	133.891	204.839	172.455	278.241	157.447	98.8709	150.711	288.959	120.276	105.698	134.342	105.46	313.126	332.172	332.08	74.7629	92.9871	83.3985	116.176	268.132	325.262	130.28	192.556	64.8603	242.993
P31146	83.2669	52.928	61.3215	21.0188	35.6737	22.5763	187.707	20.5248	50.8624	21.1575	40.9053	50.2435	49.3866	77.6223	42.9298	34.6276	92.7415	19.5923	25.3459	116.18	16.457	40.319	18.613	47.2616	19.9778	34.054	43.4483	68.5351	42.4865	37.0821	66.7447	19.6562	72.6424	176.672	56.3045	53.0779	97.4592	129.319	79.0267
P31946	144.206	148.233	248.695	125.473	125.537	86.5106	156.049	123.53	94.0274	84.6624	170.813	135.731	68.0491	213.637	167.73	139.018	186.641	111.762	108.955	184.934	140.531	120.938	150.95	134.511	121.004	40.9885	150.501	119.346	161.193	128.212	88.8209	71.2792	122.495	536.619	178.603	51.2792	386.596	139.125	315.581
P32119	116.182	87.92	142.438	85.6336	116.028	69.3897	89.1999	105.88	74.5918	49.3867	98.1934	155.768	73.9589	98.371	128.711	110.426	141.161	55.7964	69.3628	270.989	48.7802	215.639	127.621	104.96	522.977	90.1007	59.8109	77.2309	82.2069	72.2109	166.197	130.805	156.301	1845.86	97.0564	171.758	232.423	93.6473	320.986
P32942	83.7008	146.257	91.9511	97.7852	100.854	74.2418	101.432	59.4429	42.1891	61.2487	44.5788	48.0441	33.5783	75.5817	64.2359	66.9102	62.1076	58.927	42.6201	73.9389	38.8728	23.1452	103.895	90.417	64.5733	39.3175	60.4916	108.459	74.2093	30.9658	68.9957	31.3876	48.6916	65.0149	43.4254	72.7825	134.916	148.816	88.636
P35232	22.1305	66.2251	15.5191	8.56506	25.0272	17.3147	17.8105	31.7405	128.062	22.9636	68.0854	75.79	11.5804	87.9255	26.8111	231.098	33.6014	71.9133	10.72	13.732	39.6248	20.4095	7.976	13.5404	6.29492	25.2051	16.0905	18.7952	75.5627	23.7178	64.2737	20.24	14.7358	7.65175	24.4911	71.9925	8.60709	6.03698	6.04125
P35247	85.2666	59.0678	131.924	21.6928	60.9879	197.82	27.5021	262.278	68.7289	65.8612	55.2849	68.1555	36.2751	32.2581	27.542	91.791	59.5436	69.6559	104.292	90.4252	19.2418	30.4114	74.2674	65.1403	88.4661	80.8584	61.0343	22.129	17.127	49.1573	137.442	33.302	50.6286	49.9406	13.1343	66.1841	100.923	23.6533	56.9812
P35443	431.161	795.213	226.16	476.733	421.911	984.033	938.075	885.838	1489.82	657.32	2564.96	734.034	571.22	712.682	555.29	713.277	426.759	607.316	393.808	396.041	617.493	737.059	342.353	368.664	549.789	1485.46	634.218	553.708	497.664	984.449	1660.49	1243.21	684.06	713.792	1292.12	1525.74	834.438	1001.48	457.71
P35527;P35527	3793.07	2505.04	2844.84	2202.86	768.996	489.66	679.357	682.963	1919.2	2947.71	2781.41	927.361	6182.9	760.165	3221.17	962.374	676.43	2531.77	5159.78	2305.17	2892.12	1331.22	2629.68	2714.09	2889.53	1182.68	1846.46	1062.42	1276.87	1459.03	1288.76	3238.33	1944.2	1424.76	851.222	1225.04	3117.09	764.636	1586.55
P35542	42104	19063.3	60280.3	17518.7	23716	23243.8	34869.3	10661.2	15293.8	25523.1	20438.5	21192.8	29968	15167.9	32853.5	13899.4	19323.2	19037.6	83442.1	40080.9	23970.5	41185.2	44923.9	40753.4	32437.1	19141.7	34848.3	23881	16526.5	21813.5	16714.4	31517.3	43213.3	21943.9	18769.7	25531.6	36426.6	6706.26	36494.2
P35555	141.188	181.186	138.647	180.22	199.446	221.413	157.016	251.607	367.2	203.821	318.706	220.254	200.052	181.887	205.849	279.833	252.18	212.32	175.054	250.732	218.342	181.557	125.055	136.871	151.407	252.154	199.089	207.328	151.478	184.512	297.2	265.086	228.432	222.526	268.414	348.219	195.19	338.305	184.686
P35579	103.475	388.637	253.939	169.014	324.198	255.261	321.133	192.112	111.794	258.089	306.936	324.135	165.552	612.557	170.29	393.147	380.225	305.576	300.456	246.68	144.236	430.272	166.321	162.534	191.194	226.641	332.508	333.404	294.194	431.936	223.56	343.66	311.65	404.836	213.404	302.215	381.317	361.051	328.629
P35858	86.6443	82.1907	100.814	99.7864	54.1871	44.5858	100.16	105.63	79.3658	95.4957	61.876	113.791	106.818	91.4155	98.4825	81.7939	73.6827	136.624	102.223	53.0768	98.658	59.2876	111.711	78.5057	36.0075	72.6528	74.5663	100.787	114.291	110.188	84.0437	89.8871	81.8134	121.524	96.2326	99.9558	46.1715	141.297	109.687
P35908;P35908	1411.45	1399.11	3547.85	1705.22	188.419	273.068	392.937	429.158	618.548	1204.66	644.413	542.263	2659.47	261.454	1686.22	233.406	266.098	495.638	844.222	734.279	875.974	379.185	1131.17	1121.95	1670.68	820.15	315.25	423.556	304.432	126.805	354.61	1536.33	485.797	282.112	1391.15	247.317	1003.02	670.65	406.185
P36980	42.914	50.2873	56.6224	36.1971	39.6318	32.6134	106.593	46.8989	20.4365	41.5511	47.7868	51.1381	42.3427	34.1146	51.9412	34.1146	85.3605	41.3532	44.4717	89.0685	33.018	37.691	36.9759	27.3039	60.8499	44.7253	39.7731	45.3333	27.024	37.661	47.9364	37.5288	49.0896	20.9205	54.405	33.8419	27.5692	120.651	37.1838
P37802	33.5026	27.2304	45.8352	31.8755	19.3251	32.6438	29.8869	33.9987	1.70542	38.1395	41.2652	30.1935	26.7496	49.1144	46.747	42.0346	44.7841	30.3787	44.9122	67.6108	47.5575	38.9137	29.8616	20.3356	45.5911	29.2842	37.3332	21.6269	51.1076	11.2884	65.6741	12.8425	48.7895	113.307	39.109	16.9699	91.1198	64.2636	50.2948
P39060	96.0424	155.285	124.17	234.826	146.635	208.924	137.993	129.743	178.459	158.458	180.174	81.0774	140.204	111.253	77.9573	152.517	137.493	212.287	119.168	113.33	184.316	144.297	130.088	100.74	122.52	189.174	132.891	151.498	197.045	143.175	131.591	215.63	141.853	145.327	166.133	144.597	117.647	102.141	144.115
P40227	32.9049	38.0141	26.4123	25.5579	11.4441	4.37033	27.8856	25.2568	21.7453	23.6152	22.5591	49.6588	19.9211	29.2877	29.4552	223.559	25.2656	42.5533	30.2324	33.2083	32.5681	19.0343	17.3643	27.5699	35.7713	18.1966	31.4256	31.0322	13.6395	27.6583	33.9629	25.7502	27.7653	17.332	26.6145	22.6194	23.0488	37.6749	22.1381
P42785	3.13385	1.48251	7.57113	1.40116	4.03204	1.32812	2.63763	1.20188	2.88431	0.815154	3.56957	2.43827	3.65479	2.70253	2.32357	2.63004	3.92682	2.21506	1.18076	0.784777	8.73373	3.47769	2.81869	6.60625	4.61316	3.79278	4.47778	10.9132	3.94286	2.78258	1.50331	1.98994	1.89639	1.95198	3.89598	2.05162	1.62407	2.79374	1.44096
P43652	117.977	109.818	105.636	112.534	150.922	98.8868	241.699	98.0404	81.5152	102.142	84.7688	129.546	80.0055	80.161	129.038	125.932	112.943	144.823	117.793	160.261	147.656	77.5197	106.652	106.595	153.24	100.479	62.4108	112.828	119.99	115.134	77.108	175.862	144.768	231.979	77.8874	89.8833	87.2695	142.243	136.233
P46531	63.7076	38.4748	43.4847	59.6418	54.7501	53.9948	37.2984	56.5915	68.9756	64.6213	50.4182	58.9585	44.948	46.0438	32.1406	41.4109	35.0569	61.4652	40.0624	51.5103	58.1332	46.0702	34.8435	31.6276	35.5839	35.2858	32.3394	39.7495	40.8029	41.4972	42.148	46.3044	33.3202	30.7497	37.1091	62.1815	35.1542	37.0087	45.0276
P48059	38.4648	34.277	54.871	46.3716	19.6666	10.9651	29.882	37.9272	31.3978	22.7266	52.9998	19.3292	23.8955	77.4835	44.475	31.6143	52.8541	45.9263	70.2674	59.3988	38.2394	28.1935	50.1917	38.5393	37.4061	41.181	52.392	19.9801	32.9239	26.1486	20.5747	21.9834	52.918	147.797	34.401	41.3312	83.2248	69.0502	94.3337
P48509	63.3608	93.1454	147.573	87.9962	75.7173	42.3099	112.746	138.235	44.8834	62.3865	109.234	87.8515	71.1698	141.723	88.4044	75.5388	62.7199	112.382	91.5314	53.3378	85.1605	49.4875	51.1659	76.5616	51.2047	44.7698	161.909	128.488	186.454	102.887	57.1905	46.1759	57.9805	139.963	101.552	79.6772	100.75	210.172	106.314
P48740	5036.48	5120.96	4136.19	4148.67	5159.07	6053.99	3448.88	6453.03	4674.03	5340.27	3844.21	5366.33	6053.78	4690.14	4469.12	5183.64	3660.2	4681.04	5336.29	3686.19	7178.29	4542.75	5857.39	5414.76	4151.88	6000.98	3847.31	5736.84	3411.56	4810.15	5700.93	4050.88	2904.61	3779.82	3417.84	5649.14	4258.02	4620.95	3805.18
P49747	95.955	646.419	77.675	107.98	87.7276	294.908	121.355	249.783	289.374	170.146	226.639	168.995	84.2097	189.661	115.98	233.692	129.816	108.737	107.307	105.779	142.025	196.492	95.8828	111.843	112.462	173.882	174.615	125.224	105.694	169.467	151.374	254.998	111.82	125.801	166.116	207.797	145.977	296.276	95.806
P49908	750.515	504.11	520.622	411.47	516.787	466.998	728.486	333.742	276.744	462.801	438.876	483.483	549.821	769.979	525.93	329.877	616.416	572.729	555.507	274.38	395.258	464.128	394.139	422.436	434.691	444.329	453.874	658.077	452.706	434.735	360.782	404.881	743.969	317.695	376.774	609.533	483.743	472.752	730.572
P49913	3331.63	1446.06	2343.03	1007.38	1508.74	1506.82	4146.2	659.879	752.828	2003.63	1640.76	901.954	1807.29	1582.09	2512.46	703.284	1427.08	1687.68	2217.01	4413.64	1648.87	2969.16	2873.26	3086.56	5420.91	2479.75	2853.18	1935.99	1536.73	3637.04	1475.12	2672.95	4188.35	2176.98	2229.65	1172.48	5800.11	687.606	5120.76
P50552	23.0242	27.3707	24.8249	49.5547	29.8279	28.7843	77.305	13.1955	28.8044	76.4902	42.1757	98.4646	49.7203	56.8144	33.2384	16.4663	77.6106	33.4282	23.0974	30.62	11.0028	40.5849	53.7274	40.6459	22.3256	44.1558	27.9186	34.6823	26.0156	28.6467	52.9328	28.0538	33.2228	72.597	24.4101	42.9977	50.6308	41.8396	35.4288
P50995	168.465	120.726	350.581	273.553	135.471	70.1248	148.325	160.003	141.885	116.069	395.47	77.9523	30.5371	175.29	95.456	151	117.101	186.611	120.862	55.1788	88.9045	107.862	65.3222	86.7205	51.3178	68.367	284.424	199.311	294.988	59.2387	34.0186	37.8899	50.8904	78.9882	207.797	74.8799	61.8626	23.6608	83.7525
P51148	80.2044	66.2711	86.0739	76.3372	81.1737	62.2203	96.894	43.5898	36.9845	53.4234	99.6167	54.3498	29.9051	82.9199	30.0025	34.5731	59.9666	59.2791	28.0134	125.479	80.9097	130.423	55.0035	109.442	48.1847	16.3044	134.175	121.083	118.04	17.4187	60.6277	31.0644	92.8851	92.415	60.8632	35.5394	99.7529	51.7505	58.052
P51693	50.0704	35.8234	27.89	89.1544	32.3789	81.6178	50.5543	78.1627	67.6176	36.6358	88.4082	105.952	49.8858	95.5462	43.3124	155.517	56.0956	105.958	43.7492	45.8443	61.8816	56.9392	42.7285	31.248	32.6744	58.3324	29.663	29.8473	57.9496	92.7321	77.6502	49.5589	33.8416	67.0177	58.7296	64.2583	23.798	53.7893	34.6435
P52815	16.6788	17.9853	15.5396	15.9987	42.142	7.35475	16.0565	11.402	7.05315	7.06353	27.7402	10.0485	2.75652	30.1701	8.97272	67.6294	9.76417	16.9661	6.13982	13.462	4.89446	11.683	4.81711	14.1679	6.77137	11.4875	17.3325	17.2579	43.8059	35.1205	11.999	14.9296	11.6213	10.3414	15.7719	22.5018	15.6443	12.8333	13.2403
P53675	91.8417	61.493	49.5342	97.8722	94.0446	63.6288	111.203	71.6558	64.75	138.798	71.4873	65.4042	92.5838	75.0743	128.148	67.8828	41.1448	64.2508	38.6238	78.4324	135.593	113.721	100.192	69.1484	70.6357	71.9773	77.1217	87.5219	54.6836	59.7469	61.6833	75.0913	79.7919	63.0739	61.4058	75.2293	49.0446	66.4595	76.8207
P53801	159.431	230.357	233.454	312.53	289.873	154.415	287.143	414.487	175.617	114.592	373.601	106.22	167.75	127.783	90.0655	371.811	183.836	548.638	409.441	92.7428	190.204	98.315	98.3414	184.004	89.849	129.943	504.294	159.177	621.349	155.809	311.761	166.41	178.327	152.933	334.972	137.832	120.871	73.6344	149.735
P55056	51009.4	36565.1	35220.3	6768.84	4951.34	20228.6	34340.8	4792.65	3575.67	11795.7	15317.6	12349.6	11231.9	13929.4	38558.9	9782.03	24594.1	11409.7	44341.3	43272	59797.4	41322.6	71503.9	67262.5	66379.8	33670.5	34125.6	45212.4	37073.4	25446.4	18105.8	46895.5	70584.5	26359.9	28405.2	10162.5	59824.1	10079.4	62849.6
P55058	553.602	438.826	288.824	364.092	848.034	507.626	374.463	488.781	423.325	444.27	559.342	859.218	429.293	1044.09	466.659	573.116	754.932	808.559	481.84	159.375	685.552	434.086	343.833	388.134	340.57	569.357	370.35	214.591	784.486	474.426	853.531	489.803	461.301	268.51	586.3	852.833	352.169	775.512	363.671
P55072	26.3913	23.9066	30.3904	29.4439	40.8153	28.1584	78.5566	48.6279	37.0674	35.2636	24.0085	119.609	33.4392	88.5062	29.8706	20.3318	45.5892	10.6332	35.8091	61.1849	38.8538	194.001	28.611	17.3584	26.6946	51.9392	26.97	25.3185	23.6127	27.921	39.7237	23.434	35.7522	160.733	44.1882	26.7844	45.3744	29.0992	100.804
P55103	70.2758	79.8588	73.8253	81.6242	46.1078	81.1475	141.771	83.2658	76.0541	130.777	61.801	85.1818	75.0634	112.52	115.904	148.002	107.45	130.818	85.7008	77.6923	60.5442	63.2596	91.4502	93.3785	91.5312	86.121	103.878	171.542	89.0857	74.3076	69.0262	39.8765	176.719	96.8443	69.3076	143.837	68.1883	94.8952	135.923
P55157	76.1417	30.9169	27.7399	183.289	35.0604	104.228	44.8865	38.3751	33.6986	48.9373	53.8027	20.3911	29.658	25.8775	65.9143	63.7114	32.6391	36.7733	38.9448	34.062	43.8675	27.481	41.2529	35.1755	53.6872	67.3884	22.8209	35.7551	35.1124	28.8848	50.9089	40.2136	183.138	85.863	31.51	38.4507	43.6517	40.2239	77.7257
P55268	101.06	122.946	87.8512	104.488	89.2998	142.728	105.638	201.302	238.685	76.7599	157.911	131.268	85.8745	114.15	76.6085	122.117	68.1919	78.6417	71.7322	66.6414	124.156	123.678	85.2848	69.5125	89.6676	124.06	105.39	66.5157	110.705	125.511	136.724	137.072	118.108	86.5628	90.7586	194.345	95.3172	166.744	76.239
P58166	67.0117	93.0638	83.01	145.162	72.1969	112.411	154.341	106.879	84.2412	130.721	92.0585	90.5908	83.0441	94.0032	122.367	150.264	65.5083	147.435	87.72	142.351	139.953	85.3427	96.9275	104.763	169.92	43.1103	126.108	113.927	68.4273	86.2922	45.6296	102.216	106.978	64.4123	41.5103	74.561	81.2464	131.368	155.342
P58335	157.532	100.898	50.8545	96.6814	105.679	59.0548	175.736	74.4005	72.3189	102.167	169.506	161.684	145.986	188.535	116.528	102.802	198.682	169.601	121.577	58.5009	181.077	98.717	116.334	108.145	116.873	105.323	164.446	106.029	238.325	132.767	140.381	162.721	216.556	68.8857	120.129	124.613	118.606	99.6026	125.067
P58546	5.59777	2.45768	8.81209	6.80897	13.5076	7.59501	12.0875	3.64942	1.52944	6.10755	1.92985	6.92739	6.14062	7.15833	6.05844	20.1108	2.8915	7.58207	1.64546	2.52305	11.1469	6.30606	1.27813	5.35203	10.0498	4.68164	1.99339	5.82751	7.86746	6.19616	5.59869	3.31808	3.92424	8.37253	6.83988	8.31354	9.33561	6.34294	2.81161
P59666	2308.29	7869.18	3973.71	914.551	8463.68	1435.32	6032.12	534.438	909.915	1975.62	1917.72	1691.99	1429.32	2529.68	3191.37	707.505	2611.69	1826.01	3350.55	992.732	2130.88	8835.87	2671.67	2524.58	2005.89	1347.53	1922.46	2514.38	1851.28	657.775	1253.34	2453.77	2278.39	1201	1587.26	1449.57	2232.2	579.953	5133.97
P60033	162.332	115.616	143.657	174.258	127.543	161.807	66.7106	187.814	69.1485	147.914	71.8588	75.6947	97.3759	31.0647	122.163	131.567	110.3	122.335	203.995	114.155	187.753	69.885	191.516	56.3345	98.2721	64.8872	60.9257	67.872	121.869	108.932	218.801	43.3796	65.5959	206.385	67.9757	104.216	84.0211	197.42	117.079
P60660	41.8872	245.525	160.127	101.812	183.286	133.232	186.449	98.8256	34.1248	126.689	171.078	207.247	99.9055	309.011	86.1673	229.552	221.445	191.951	178.274	153.84	57.4218	163.514	115.082	122.508	141.175	130.27	205.168	148.083	155.46	370.966	129.293	244.621	202.862	283.977	136.117	166.138	311.049	172.847	218.827
P60709	735.605	891.645	1328.88	551.188	770.42	343.649	845.619	781.857	452.64	378.807	859.099	602.666	366.361	1892.81	1139.33	1176.64	1190.88	923.321	803.448	1607.91	868.06	713.855	851.645	651.399	406.247	318.932	839.799	620.103	1169.61	450.36	505.95	427.379	1126.35	7120.12	1440.58	869.597	2687.78	1542.84	1650.74
P60953	64.4657	138.051	137.29	78.7322	136.079	49.9935	121.593	60.7704	85.4811	52.4887	123.731	78.0817	62.264	130.208	129.656	93.976	107.456	94.993	91.9235	117.858	84.7041	146.994	85.7622	137.524	60.23	65.8766	122.927	127.386	132.292	77.6667	45.4901	72.7019	113.103	201.958	167.271	117.219	185.64	116.432	217.018
P61006	31.7396	22.0896	48.5925	28.1362	38.2257	11.9299	27.8949	11.7891	20.8396	26.7271	36.547	10.0559	12.2833	28.0244	17.2267	16.6052	40.7208	16.5258	14.5568	21.02	15.1111	32.8188	30.0308	28.6546	33.8868	7.14643	30.4366	23.5034	41.5853	12.5607	8.21037	28.4296	34.4682	40.3322	18.5166	13.8206	44.1257	22.9535	37.8244
P61026	99.4846	114.591	108.669	105.654	107.639	46.8952	104.846	63.8945	88.5155	63.5958	123.51	63.4433	64.1377	137.835	95.592	89.2837	75.4086	97.2388	66.6415	85.8001	107.827	116.427	69.6923	68.9102	77.2253	64.9703	83.8726	113.394	127.594	73.2337	84.3263	65.9957	105.898	135.241	109.077	65.4196	121.155	117.337	126.405
P61158	179.957	109.665	100.772	126.076	112.152	82.0552	36.813	80.2673	52.0877	75.9454	88.8507	127.836	94.426	95.5681	214.148	45.945	51.6218	47.1971	53.4937	92.8905	177.271	78.461	20.5228	73.0022	97.9712	67.4101	71.635	97.4259	68.1412	88.9052	95.3629	27.9678	241.393	155.717	96.7721	89.5178	117.4	83.1404	53.6438
P61160	32.9924	18.8334	36.633	22.272	31.0249	49.5433	26.3498	38.2174	33.0672	20.6673	32.7905	34.7646	27.2729	61.3455	29.0178	29.3978	31.1013	14.8633	26.0962	48.4057	31.7069	34.5726	47.026	35.8637	26.4917	38.5628	31.405	28.0637	24.3009	31.2953	44.2585	43.0072	35.1272	57.8867	26.7004	43.8326	28.0243	37.3675	38.369
P61224	272.098	274.665	576.896	280.609	321.419	132.509	305.98	248.353	203.748	171.788	457.383	187.974	138.517	392.387	299.868	237.539	255.454	323.876	314.014	284.036	331.293	250.28	261.326	261.686	207.771	128.571	223.737	150.762	340.581	169.524	98.5987	160.618	263.934	662.06	334.027	182.345	630.139	354.539	481.066
P61586	231.25	178.378	224.736	215.615	305.453	135.771	205.101	137.821	151.643	215.465	172.764	81.1523	100.371	158.908	271.23	111.014	215.679	299.528	133.59	319.613	180.805	230.586	301.883	261.406	238.178	142.678	203.279	96.3292	169.25	158.435	88.0541	156.166	128.277	385.961	250.425	151.572	313.29	194.31	341.96
P61769	535.135	367.06	407.093	307.648	605.819	226.197	342.892	98.5665	224.241	230.783	314.514	167.748	326.356	290.937	281.712	232.268	260.397	226.171	180.913	202.697	233.656	552.522	308.905	356.522	270.862	264.783	224.333	389.028	593.975	218.959	118.071	262.925	288.698	460.903	459.725	219.437	489.127	768.166	526.327
P61978	16.169	36.1409	21.3553	14.6209	11.5745	5.84368	10.1574	31.2394	50.9232	7.77326	33.9958	38.2177	2.72974	50.6868	11.1462	137.729	3.4657	3.29756	23.2091	15.9383	6.62208	12.2629	8.06427	5.31421	9.89487	4.37505	12.6318	14.8713	35.3806	8.07846	7.07962	10.0902	12.5828	2.7565	8.12049	32.0063	9.06328	38.2177	12.0882
P61981	32.7569	32.0674	43.0104	47.3538	30.4134	20.9573	21.9069	34.2631	23.8308	23.7188	35.5256	25.2516	30.0129	36.2658	25.9982	29.5359	16.934	17.24	22.1232	47.1573	36.5093	25.7322	24.8473	24.0641	13.4247	17.1608	18.577	22.6341	30.7644	26.5154	33.5177	16.2399	38.0115	89.0477	59.3949	37.4394	50.903	39.9753	51.3753
P62258	48.5594	38.7451	93.7451	59.9918	76.9445	44.894	67.3881	67.4353	29.4917	62.3714	50.4217	51.8437	35.8521	42.9576	62.1914	79.7656	41.7945	45.632	48.8758	63.1853	54.4899	35.8821	59.1907	34.394	39.6554	29.8421	53.4695	30.8517	61.3772	44.6927	78.6779	26.2509	42.6983	262.183	49.9077	32.7553	134.848	82.7796	99.5442
P62266	82.2523	19.8485	61.5908	15.6476	28.6863	17.4094	36.7208	6.94033	23.8544	7.12793	33.8063	23.3547	18.2935	25.4677	25.172	14.9339	21.7404	21.3666	36.2564	41.8304	72.7123	35.8588	24.279	43.5893	39.4416	16.8356	38.1065	26.8157	27.5509	31.2508	9.43045	31.7362	42.7974	22.5099	29.5153	27.6562	8.0442	20.9525	55.4682
P62328	45.4149	26.9675	77.6195	38.6487	21.1455	19.4796	30.9706	31.9905	19.54	13.0744	41.4496	31.7602	28.4308	43.455	28.4907	34.9481	34.2544	32.0167	29.4882	44.7085	41.0835	33.1019	21.0949	17.3662	20.1705	47.4064	36.7635	36.4327	23.549	15.7022	33.3196	15.0142	30.5916	159.132	29.0081	44.3322	114.884	57.9021	54.8354
P62736;P63267	295.783	279.957	498.142	242.895	199.016	137.916	384.133	407.051	204.124	254.044	269.33	284.488	156.149	493.626	294.218	504.213	418.612	359.175	252.528	430.146	390.621	236.634	308.564	198.449	183.315	177.732	271.943	293.867	416.999	250.437	335.312	177.504	352.953	1574.74	438.193	181.311	551.462	316.328	422.931
P62753	32.5229	7.74385	59.2564	77.5062	60.0315	29.6149	44.7561	35.3705	51.2639	64.6199	27.0982	69.4546	42.5466	26.7496	48.54	134.696	59.1827	56.9208	92.4269	20.8276	78.0784	15.7604	28.3173	31.4276	30.8772	65.7833	47.7195	42.7084	64.9571	61.3383	153.696	69.1594	44.2109	93.3444	48.7081	59.7375	31.988	20.2292	32.0308
P62805	287.589	1706.14	1993.84	942.011	1662.31	771.359	1561.46	894.485	53.4761	780.856	358.285	501.565	138.587	1743.36	211.925	1174.12	415.867	328.226	1063.68	491.452	209.169	781.978	841.743	865.131	53.1193	264.103	346.455	1364.46	214.108	108.675	48.8107	116.786	123.025	57.9572	121.433	132.687	139.732	61.2279	382.533
P62873	206.937	226.097	331.186	226.525	220.576	148.151	253.317	157.888	100.353	106.245	162.181	106.569	128.932	190.401	169.135	127.639	148.598	168.782	203.69	214.739	240.908	167.187	297.842	213.241	177.24	160.714	165.619	106.146	223.509	160.35	81.3731	118.104	197.995	343.775	222.91	181.609	332.62	287.835	353.411
P62937	109.221	98.9156	162.677	68.3624	70.6737	43.624	69.4729	89.2032	59.1662	21.3651	119.748	35.4811	23.1411	126.282	124.517	94.5179	106.144	89.3155	62.2785	146.351	81.0391	86.6676	94.5278	78.3946	60.3945	46.98	113.427	45.855	122.876	58.058	83.6691	48.9103	104.749	405.952	153.217	53.3237	274.146	105.458	191.393
P63104	102.666	148.034	210.931	83.257	123.785	72.6287	130.824	87.9093	90.5336	58.8872	149.113	81.1417	54.0886	213.286	161.31	137.875	169.577	117.292	91.5507	230.197	134.621	166.037	145.602	133.808	86.2246	53.2362	184.393	135.687	184.102	84.5724	79.5517	85.4835	222.326	552.039	201.337	86.7339	410.731	170.761	284.603
P63167;Q96FJ2	26.7117	19.2834	24.8098	19.8345	15.1725	15.3461	25.3825	24.8417	27.2777	16.6347	16.3163	6.49409	21.891	35.8994	27.6056	150.646	26.7469	14.065	43.8885	26.2528	52.5946	31.4572	6.2506	25.4896	22.3734	33.6262	25.2199	27.1396	21.3973	24.9052	90.6493	29.7013	14.2672	13.9915	26.0819	57.4375	20.8755	21.8989	18.8576
P63208	10.2061	4.09388	9.77882	3.11761	18.7176	8.24783	9.26512	14.4595	2.71283	9.06018	6.33152	13.2643	11.2101	21.893	23.4448	89.404	4.74077	6.49845	12.2115	10.98	25.37	6.65534	10.397	5.03164	9.60049	11.4647	4.56243	5.35926	7.37174	7.94649	35.8583	10.887	4.74786	12.2738	9.91262	29.7543	13.2918	11.3659	14.6898
P63261	22.9896	37.6615	12.4401	43.6028	50.4153	7.76406	26.4288	63.7627	18.7847	45.5768	9.36486	20.9327	8.57211	9.64457	27.3093	72.7583	48.0757	33.9271	59.6477	47.2721	57.7874	68.3913	27.3955	51.6326	21.2525	80.0376	12.0344	27.0735	18.7507	29.8143	146.574	62.7508	34.1326	277.262	21.3036	76.4805	167.084	34.5881	55.419
P67936	96.2379	76.8676	143.73	63.4713	95.5099	104.279	78.7512	137.172	56.8227	82.6803	103.111	92.1743	84.4128	230.635	135.168	89.553	179.491	83.601	81.5717	245.563	86.5038	92.1363	112.563	102.335	56.4172	54.554	116.593	93.6775	140.995	61.1971	304.012	79.4267	204.445	1799.45	228.987	141.103	484.571	773.781	235.552
P68104;Q05639;Q5VTE0	42.7467	45.6076	33.3558	32.076	33.8167	36.1496	20.1229	63.8331	25.4837	52.1543	23.3216	19.0938	21.584	19.5285	40.9657	138.575	12.8271	17.522	109.237	28.829	144.628	34.3589	20.8181	21.0561	21.5629	15.7868	47.2675	30.0395	11.8707	23.044	486.801	23.7071	26.4707	50.7241	16.6405	35.5559	21.7598	39.5357	30.5435
P68363	33.7147	32.725	26.5495	25.7694	56.5123	35.1302	26.1495	29.3684	115.589	60.7533	112.532	46.8043	37.9413	64.0226	36.4291	460.008	33.4643	107.666	37.5577	29.432	68.0697	53.4514	40.3807	50.5352	20.4946	39.5034	34.1961	34.8017	103.906	23.8157	34.3043	53.8698	37.3074	36.1556	46.8718	46.0767	27.4599	53.1888	30.6554
P68371	100.027	49.5877	133.817	59.4253	85.9706	45.4805	79.6991	63.9562	68.0381	59.9363	71.7355	71.0143	40.2113	69.0876	50.8131	87.5861	60.8928	67.4694	84.4992	100.389	75.0406	209.545	74.7834	55.9723	89.6707	39.9891	21.6919	94.83	79.4555	82.232	95.6744	36.9071	65.034	154.321	77.7084	73.4834	59.9186	301.695	71.5169
P68431	138.046	665.124	882.998	347.761	599.093	330.929	576.673	469.758	32.1634	329.903	74.9588	326.235	81.2106	792.074	136.386	589.808	188.804	193.568	409.795	242.591	126.696	451.711	439.765	279.208	36.5706	72.3631	146.877	714.59	139.327	83.683	49.2911	87.7186	79.8749	38.7982	51.0136	117.907	82.8451	44.8008	179.62
P68871	5467.57	11667.1	5788.64	13453.5	11095.1	71947.3	37174.5	23851.1	22964.2	30492.7	10002.7	1578.36	34016.7	38632.6	10911.7	29079.8	23927.5	3085.58	9563.99	31043.3	26142	40874.8	26166.6	28063.2	39321.5	41593.7	5914.71	9214.3	18618.3	6356.24	25648.3	31524.1	46764.6	78545.5	16665	46796.2	30250.4	9797.13	48752.2
P69891;P69892	122.425	52.9712	88.1087	107.166	59.4696	421.13	169.844	216.579	89.2662	77.3551	46.7929	188.187	95.951	165.036	121.879	375.658	230.1	48.6333	77.9784	98.5341	81.0221	1192.79	133.87	64.2495	166.466	634.482	120.08	224.716	69.5151	94.0705	455.54	238.704	182.329	428.585	121.549	497.36	210.906	136.181	122.778
P69905	5195.31	7922.1	4966.72	10456.9	8461.8	47220.2	27341.8	18795.8	14042.8	23947.8	6471.02	2494.97	23078	25852.4	7630.4	18198.2	15667.8	2800.84	7942.32	20099.7	20289.9	28710.5	21826.8	22366.4	31002.4	28019.3	4555.27	5644.89	10715	4347.02	17673.8	21615.6	32319.9	57814.2	11824.1	31593.9	23758.7	6133.25	38401.3
P78509	601.327	727.703	498.571	448.088	921.874	926.512	472.805	664.845	1883.11	593.134	1739.01	548.421	752.348	535.862	408.643	721.359	431.936	1003.93	601.913	521.791	864.82	1156.21	781.827	738.64	715.841	831.08	674.152	467.299	480.398	1051.18	961.048	624.584	467.859	539.821	1104.34	744.398	563.756	1114.58	485.567
P78527	10.4773	81.5577	38.681	66.2275	63.9581	23.051	59.0687	8.55785	18.9677	49.3224	69.1558	39.1112	7.92645	41.7877	22.8126	49.979	74.3406	86.8133	5.30109	80.4651	7.90623	36.2775	15.2009	13.1919	17.3204	52.2619	49.6458	142.341	121.644	19.8171	24.1548	114.52	106.889	7.24017	17.3976	45.2979	21.8214	28.5145	26.5012
P80108	420.426	481.545	344.465	1401.05	802.196	690.812	363.371	651.802	462.636	455.043	302.888	581.201	619.116	823.237	516.583	537.835	838.357	1464.2	386.058	156.496	1176.95	236.706	521.954	524.349	502.357	1007.65	412.805	490.297	1743.95	539.553	1279.98	854.363	776.047	475.557	360.291	581.895	377.912	1089.16	511.67
P80723	44.7772	55.0782	58.5005	32.217	36.7335	30.366	84.9004	14.2077	14.9632	117.762	22.7342	17.874	38.0438	38.3789	31.7052	51.8979	29.2351	20.0377	21.8985	53.2993	29.8925	28.949	49.5714	59.4589	32.4806	18.0525	54.7765	40.2115	39.3833	17.461	24.4398	23.2966	63.1862	44.5764	38.7032	29.2377	98.3894	60.9136	137.225
P80748	518.053	539.766	459.124	752.763	4467.26	887.79	920.209	1791.48	818.168	1108.16	814.852	1687.24	578.979	721.676	2007.5	1032.3	1518.45	1496.89	1089.17	1470.57	1144.12	2012.24	407.77	516.731	911.664	607.501	304.823	909.716	1206.51	3111.33	2282.29	1644.16	996.9	466.9	1951.44	12580.5	288.54	1848.77	714.989
P81605	1189.63	651.897	1009.87	752.441	341.341	311.494	899.646	580.607	235.854	1369.71	256.097	644.078	1313.68	297.297	1159.59	316.674	741.492	212.18	811.916	480.538	171.533	263.553	695.137	247.745	723.241	131.093	89.3027	392.474	178.602	61.5343	1650.7	260.851	424.184	277.846	164.329	384.792	555.796	423.343	543.853
P98160	105.706	128.651	93.061	131.224	124.422	217.684	94.8368	163.131	216.63	151.14	179.697	140.88	116.002	113.84	88.6068	127.816	114.542	113.764	98.6949	98.4913	141.783	93.1454	111.272	107.081	80.5394	123.325	113.508	90.7855	149.001	189.798	188.57	138.723	85.5971	117.316	144.876	168.904	108.653	240.343	85.159
P98161	33.8	37.3952	24.9419	57.0103	29.3566	44.3251	32.1721	61.655	67.7114	39.3878	39.0408	54.2953	32.8554	40.8444	48.4345	67.7081	32.5499	34.3864	49.9684	37.5866	64.0765	41.9471	49.8589	47.3496	43.2256	40.9409	50.4518	38.8053	37.2234	51.6273	73.8461	37.887	47.4839	38.4196	46.0979	55.9465	33.2378	45.2261	24.5409
Q00610	82.6636	244.406	97.5593	65.3643	169.382	224.446	133.079	125.465	102.304	137.775	134.055	150.699	133.221	221.895	59.1673	117.071	148.699	123.996	105.493	144.808	122.221	270.863	97.6726	96.0922	125.863	153.31	131.152	88.1368	153.827	118.639	84.0237	125.195	124.519	211.492	74.2109	90.9645	165.633	220.486	110.843
Q01518	25.6561	153.582	72.3442	42.6461	45.8151	36.5964	52.2886	42.8111	26.4928	36.6305	40.3259	88.7507	35.1427	115.386	50.2213	61.4164	95.2165	37.2505	78.9977	72.6084	52.6267	48.8793	63.6852	47.7909	29.0837	35.0714	34.4345	63.9511	55.6551	36.966	70.2568	27.6704	60.6433	242.207	53.965	41.2935	124.023	94.7216	87.0598
Q02413	64.7895	49.3565	113.995	48.9802	23.2649	35.4304	6.14474	26.6097	76.7236	65.5026	53.3959	21.1917	133.256	17.2285	77.004	38.8691	32.9851	14.1358	116.349	19.3401	33.0772	14.1229	49.6275	19.1183	60.8793	20.1587	25.6868	26.2494	23.9186	32.6622	33.7705	26.6275	6.38289	21.4835	29.3186	42.1465	23.3053	32.8075	20.0373
Q02817	84.4119	205.41	54.0202	89.2946	58.9555	152.663	66.8162	30.9656	86.9104	145.584	50.0433	29.1909	76.1458	45.4363	142.411	40.094	108.412	108.514	70.0059	84.3191	180.27	56.9752	168.251	178.09	44.4822	198.513	112.666	103.166	187.629	178.686	52.469	100.471	85.6121	65.6595	100.721	46.3788	115.354	69.0948	66.709
Q02818	112.536	69.5158	70.7793	228.905	56.2796	146.452	139.513	44.8782	93.3472	90.5193	87.5406	43.7582	95.6324	60.9506	140.172	134.604	88.0529	108.598	118.182	114.432	123.753	83.589	95.4784	73.5889	188.745	174.756	88.4983	163.653	102.137	81.3181	95.6062	94.901	326.929	229.255	83.8761	51.07	113.672	44.1543	199.093
Q02952	5.3685	3.54115	5.67009	6.52766	5.57249	5.76071	6.57025	3.80684	5.85292	5.59727	10.6008	4.70243	3.93744	5.14448	1.92001	12.8355	4.75333	7.65546	4.92617	5.6971	3.16603	7.73903	3.41549	3.41549	4.31903	3.05272	4.63946	12.3438	3.64877	5.20175	1.55448	8.09582	1.73165	5.32263	1.90629	5.78792	3.22128	4.69646	4.08528
Q02985	233.746	224.114	268.269	213.229	335.067	212.956	427.548	367.184	181.903	500.4	261.226	319.841	386.029	224.605	403.954	520.639	496.069	375.552	335.223	288.954	239.333	143.302	279.002	211.079	350.357	129.305	158.033	139.51	97.9103	224.253	361.866	403.28	298.224	362.8	255.875	311.954	295.555	244.046	408.267
Q03591	335.94	363.159	422.544	465.84	512.312	300.929	905.198	358.977	498.029	616.712	293.462	375.065	402.009	464.4	319.987	374.841	600.837	541.796	491.42	401.13	335.851	313.192	296.122	288.596	294.481	317.187	292.036	381.712	241.005	324.031	330.982	655.354	283.301	438.363	310.836	331.523	298.421	903.791	518.516
Q04695;Q04695	136.011	51.629	63.1781	56.1146	54.196	71.7877	67.5663	19.6106	54.0589	52.8786	61.1174	68.3308	58.0218	56.1097	44.8118	75.5301	44.1261	58.7123	92.5355	101.28	112.762	77.9375	80.8132	58.8489	75.339	71.3933	294.35	52.1384	37.8918	110.723	164.789	49.8995	90.9313	66.9265	56.1798	88.1744	63.0028	25.5659	90.1549
Q04721	46.927	40.0857	27.8486	54.4072	47.7479	80.0622	55.9482	73.5721	51.8825	95.9101	59.3299	56.4555	76.1433	68.5497	61.9075	81.3618	40.9715	61.981	46.8481	34.4345	60.8157	60.1848	31.7839	32.1245	42.2615	45.7223	38.0832	49.2723	59.1663	57.2901	86.1822	53.2557	32.7318	52.0427	54.7588	51.7476	37.4856	103.307	29.6814
Q04756	405.292	275.882	636.015	280.053	127.678	273.094	329.77	556.494	206.145	479.976	285.474	726.109	267.234	298.612	439.18	474.697	390.799	383.049	354.224	412.889	267.929	414.476	249.925	220.466	257.375	297.46	295.522	400.404	251.325	339.376	298.767	260.018	332.933	254.685	187.719	295.992	265.483	356.935	316.502
Q04917	88.5633	64.9582	107.263	71.2955	66.8895	30.3837	68.3616	70.8877	43.9027	61.6849	71.7309	30.411	74.5659	75.9736	98.4592	60.0036	62.4916	35.722	72.0621	82.4015	134.147	94.8669	65.2781	56.4682	94.2171	61.852	67.5464	79.1098	57.6716	85.0492	79.5253	36.3417	51.3688	204.691	76.4008	43.1133	194.754	99.4011	173.081
Q06033	282.557	184.019	291.629	238.145	723.462	386.571	329.138	288.032	301.265	247.04	265.572	293.714	304.775	485.114	335.388	412.192	307.688	349.718	390.222	315.49	178.465	290.432	323.069	316.372	384.755	289.239	297.465	353.464	319.475	283.686	358.172	236.742	385.967	286.439	217.561	299.218	194.427	436.667	246.83
Q06830	40.1458	70.3409	15.1034	55.0792	55.3857	45.1116	41.3765	14.3541	35.1062	57.4753	36.6544	88.4735	72.9705	29.4493	74.9831	199.682	77.7658	60.3596	40.9425	67.6251	28.8211	13.738	23.4678	39.947	46.77	58.4023	34.9113	46.85	70.745	49.0431	16.4363	52.8196	87.0517	112.049	53.5221	71.7564	38.5387	106.223	44.1763
Q07954	2199.66	3450.81	2773.27	4252.42	2744.58	5064.44	2141.91	4487.38	4820.43	2692.38	4808.05	4477.14	2851.02	3631.33	2675.65	3633.74	3406.88	3517.34	3422.98	2735.55	2703.25	2307.99	2347.84	2292.65	2572.14	4062.67	3041.16	3449.11	3673.62	3641.8	4493.67	3103.91	2323.65	3114.52	3288.02	4963.5	2333.42	1107.36	2193.84
Q08378	117.108	120.492	71.0238	37.6583	111.852	216.232	162.575	52.6388	148.513	155.358	118.582	103.071	144.47	84.0233	116.362	54.9764	109.055	56.0453	55.0042	108.732	41.2313	162.133	110.237	175.189	154.456	152.887	219.832	232.296	106.069	133.081	55.9278	90.3077	169.857	90.8512	210.024	68.8099	238.586	47.0128	203.412
Q08380	28029.6	38676.6	41631.2	60960.4	62190.2	42356.6	22617.7	33888.3	38970.7	43000.4	41998.7	27134.2	54833.1	49054.6	49247.3	61495.8	37970.8	40392.7	56514.7	41613.3	45193.4	75132.2	53480.2	58248	65568.6	36408.7	55415.3	52519.9	39871.1	42281.6	31436.5	37623.6	34668.6	32595.2	28798.4	47834.9	40332.3	28950.2	40327.8
Q08431	238.624	175.805	200.037	335.096	87.8718	163.009	98.3251	120.893	107.071	68.8062	141.694	94.7582	112.088	90.9451	106.728	93.9782	69.6928	76.0518	92.8231	133.018	107.111	97.5798	254.488	233.173	92.2734	143.342	108.124	93.322	185.427	224.233	129.07	72.0023	139.973	102.508	120.082	151.807	240.613	136.705	205.7
Q08554	79.2989	72.6077	128.835	75.4861	22.0593	25.2377	46.6929	38.2728	55.7874	89.9733	89.6617	40.9988	168.082	51.3056	115.615	51.7856	60.7196	54.8364	66.6786	46.9794	47.626	8.62418	55.6343	47.9919	70.8434	53.2531	48.924	33.127	34.9284	58.8431	19.2687	71.4503	44.747	40.0207	46.8134	59.5505	88.3882	47.263	65.0709
Q08830	52.8729	27.9869	41.319	45.2734	179.525	131.726	46.748	61.2345	223.138	36.2247	67.9243	86.9557	70.9727	70.2849	24.1372	57.1234	32.7847	58.0439	38.5746	20.994	62.2784	51.3742	144.181	194.566	36.2204	66.5653	43.5575	51.2061	100.426	66.1194	50.9046	47.4692	34.4033	29.9929	34.1155	61.6711	65.987	175.753	30.7288
Q12805	65.3909	107.958	63.774	134.09	69.6215	43.1952	69.3655	23.7112	52.2699	132.75	123.49	62.0399	62.2106	84.9232	79.9367	57.7537	69.4705	101.986	57.9315	60.8331	96.895	90.0791	104.65	53.0882	102.538	58.5198	89.4825	46.6828	135.451	251.016	97.7217	65.2879	120.324	57.2722	94.8266	131.613	87.2081	71.7362	64.8194
Q12841	78.3411	100.442	96.0801	139.981	74.0286	124.775	72.2088	135.268	162.558	93.9092	181.425	146.343	113.888	119.792	78.0732	103.796	108.22	107.236	96.4291	77.2319	91.7086	66.2373	59.8698	65.4892	81.4338	136.542	120.537	123.45	92.3278	120.746	155.817	102.947	94.2781	114.987	114.564	139.069	115.892	21.4659	86.738
Q12846	666.546	464.915	562.142	542.725	127.578	310.481	471.282	389.517	552.66	628.617	258.398	219.562	399.059	486.456	539.251	285.828	590.276	492.943	459.533	563.45	499.125	806.121	1081.95	1124.06	212.829	591.374	851.545	461.753	550.619	656.434	570.728	696.654	1033.1	899.666	933.094	1071.89	281.591	213.554	692.031
Q12907	445.715	353.058	285.039	200.222	350.279	192.367	365.94	143.765	313.142	375.498	245.911	446.795	313.797	106.93	400.319	83.7012	565.214	474.739	338.2	276.333	335.812	576.538	283.187	243.709	440.692	312.699	242.414	156.14	386.954	174.258	129.867	203.17	166.715	329.97	380.867	889.619	178.249	314.476	242.845
Q12913	44.8663	53.1147	59.5513	46.8688	71.0115	20.687	58.4222	39.4456	26.4486	36.3311	63.6004	32.1115	41.0141	67.6752	56.6317	36.2386	36.3724	59.4567	38.9196	44.0777	43.9663	33.6063	44.7408	40.3541	27.0088	26.7913	41.811	62.0821	74.1454	31.0957	25.5139	25.2665	37.4814	97.852	48.5377	33.9023	100.788	56.6677	74.2029
Q12952	55.464	36.7814	26.9966	42.1138	70.0409	20.419	158.492	24.6558	20.2472	13.4017	13.2795	27.7279	14.6613	6.53556	45.6367	22.4069	39.411	25.2185	48.7808	63.1973	40.0306	37.0763	48.3729	37.5122	21.8899	16.3289	21.3095	47.3989	12.0944	22.7967	27.7272	36.4995	42.1345	80.1123	20.9411	9.82206	12.1138	69.1458	30.8604
Q13064	178.083	151.083	119.938	152.309	112.716	201.8	150.936	316.177	267.409	186.608	127.031	336.675	256.435	287.523	173.06	183.043	169.326	201.558	81.5256	151.377	165.16	215.798	185.541	180.567	140.859	286.717	161.416	224.66	103.479	199.403	219.409	123.469	112.594	161.035	108.243	214.967	144.898	134.338	127.37
Q13093	625.225	664.289	543.916	437.198	566.46	499.437	795.951	349.672	536.117	514.611	602.049	702.268	541.291	719.235	679.098	519.566	520.341	616.472	595.83	623.468	852.193	677.049	630.346	708.603	1070.38	711.641	902.023	908.399	912.131	807.809	477.164	693.21	1010.32	528.191	687.647	862.955	679.266	701.646	805.878
Q13103	77.3372	84.3562	102.807	134.737	140.799	79.3624	104.244	61.6722	75.5119	71.5184	82.618	104.338	134.709	87.242	86.0052	126.971	127.958	85.1593	139.432	252.545	68.8937	79.6925	55.7336	55.7516	220.887	40.5668	45.9726	74.2608	57.5709	47.2916	49.704	67.8025	75.5345	74.0179	53.1073	48.3204	56.2889	97.5499	133.723
Q13200	24.1864	9.9191	18.6129	14.9279	4.81349	3.97689	10.3849	4.90551	4.01998	23.3568	7.8091	6.20259	11.5113	7.08266	2.85496	14.5493	4.61093	3.59612	4.11347	9.65393	12.4499	11.1942	4.24386	9.85303	7.80295	4.99902	8.85625	12.4419	16.321	13.5827	6.07232	11.217	10.0033	4.94785	13.3974	8.39925	7.32952	7.94054	14.6178
Q13201	781.489	452.259	558.634	739.833	820.731	668.388	874.361	899.986	546.739	1182.14	904.397	1315.13	1325.58	1545.8	850.104	1306.71	1660.07	2153.31	1334.94	922.894	1142.32	869.29	843.752	804.574	1236.56	979.693	1226.77	1104.98	1163.21	1354.74	1682.91	1415.69	1193.76	2287.79	1631.57	1748.3	1294.85	297.63	1881.15
Q13232	12.1027	6.00166	56.1273	75.7145	9.45594	18.2296	77.8778	70.5659	9.45594	72.0346	15.9166	1.08478	347.079	16.327	77.8778	8.76131	79.9161	20.5891	4.34779	58.724	250.463	71.6928	104.153	104.153	6.6797	85.8365	20.9501	23.3161	54.4267	28.0301	19.4564	67.8839	70.9649	55.5383	8.64423	30.6866	67.576	21.3716	238.327
Q13361	24.0369	21.6229	27.98	23.95	12.4868	19.9049	62.9351	27.4399	41.8479	24.7347	34.0288	15.9052	38.6528	55.8762	32.2018	19.8843	32.3123	34.7997	36.3801	31.8688	14.0182	38.9745	50.946	44.2653	54.8982	23.6307	28.7386	32.457	24.4884	29.4387	28.3438	30.3412	62.0673	20.6506	35.855	35.5185	26.2435	51.8205	56.8745
Q13418	26.8566	38.5217	53.5333	26.4316	32.2865	47.439	27.7141	17.5093	33.8704	30.0785	36.9893	30.2789	19.368	34.0301	43.8934	26.5462	39.4639	47.3355	22.869	41.1922	29.1565	25.5329	38.5144	16.321	21.3831	66.9212	49.7543	39.6809	36.7367	28.9478	44.6257	45.5459	28.0429	134.925	38.8047	39.4227	63.2814	53.729	43.1374
Q13642	19.0423	16.3742	9.25789	39.3869	13.682	13.9235	7.05922	24.0908	20.8974	15.6318	21.5635	13.1624	15.723	41.0537	26.2728	26.8577	17.3267	17.9915	12.398	17.131	27.1868	19.7519	26.7068	32.0527	22.3013	20.6189	23.8293	27.736	21.0492	31.4616	25.5373	19.98	20.8522	60.3362	32.637	10.6719	23.9499	52.3719	19.1541
Q13790	9105.68	7104.93	5990.63	11325.4	14224	9511.17	9036.25	5548.73	7931.61	5279.68	7080.02	9479.38	6158.28	13921.4	7360.87	13258.6	9240.84	11038.8	9295.39	8826.5	6055.23	5983.95	6673.59	9727.49	6593.4	15033.6	8953.85	9236.16	16188.1	9956.71	9325.82	11824.7	14319.5	11533.4	10068.6	11983	6904.05	6458.86	11689.1
Q14242	119.406	99.0666	161.205	127.104	52.1629	87.8139	166.916	143.25	85.4777	136.275	81.3433	107.228	90.6376	86.8989	127.741	101.832	63.916	63.6116	127.358	118.349	227.387	69.2831	173.511	152.491	153.683	37.4582	146.27	59.812	175.589	173.838	180.573	221.143	128.401	190.167	57.4637	136.633	158.231	96.0145	106.594
Q14247	90.2513	57.0377	43.0993	145.446	217.834	79.767	59.2684	67.8892	10.0459	77.9817	69.4705	30.3732	134.978	85.9763	56.2698	74.867	41.5027	68.7114	32.2411	55.8728	257.423	96.4381	86.237	75.9459	99.3619	82.9793	47.3516	31.7091	27.5043	49.5351	190.395	86.2651	93.7412	57.0808	67.7644	11.3878	39.7175	991.063	33.0328
Q14314	155.386	138.353	140.447	161.432	138.175	190.687	183.83	177.274	129.217	184.462	162.612	130.731	93.0264	212.245	100.561	198.546	94.5647	211.12	97.0199	119.398	97.9304	109.64	161.572	146.101	90.8888	133.84	153.461	232.358	127.469	196.242	73.6317	91.2808	98.2138	95.4952	119.314	102.168	145.751	56.7769	80.4149
Q14515	33.976	38.4378	33.1893	28.8635	42.6287	38.6607	31.9506	33.1438	61.5136	42.295	59.2004	49.5375	34.2716	69.2451	35.5886	34.062	39.5435	83.3059	30.804	17.3175	38.5743	56.1832	64.9117	56.4045	42.0658	72.3086	44.5794	35.0006	64.0607	35.7825	59.4267	54.8451	47.4962	36.1104	67.5149	78.7983	39.7156	50.2813	40.7783
Q14517	38.8973	49.5974	25.1626	53.1584	74.7492	68.7749	57.6669	74.5444	55.0196	54.9905	64.9633	38.431	24.2385	41.3045	41.832	73.3527	31.8405	56.5631	32.8731	33.0413	50.3777	28.1751	39.9595	45.6751	49.3985	77.1127	39.4285	60.4227	51.7873	61.8539	49.5835	55.4929	59.406	68.3144	49.9054	29.0065	50.2804	221.258	93.9393
Q14520	143.368	76.5234	146.829	59.7854	105.468	76.9418	111.305	49.8009	73.3792	74.9654	77.2524	88.8393	75.5359	65.3288	76.6823	114.961	86.3702	82.5495	104.123	154.47	68.7865	57.8243	68.9447	101.514	120.073	96.2862	94.3926	97.6029	86.7386	77.9017	132.669	76.4002	180.975	86.9656	86.2654	53.3163	107.25	88.0334	100.699
Q14623	36.8046	21.1727	21.5953	16.9287	15.7123	6.37256	23.2737	6.88867	5.88729	19.8925	3.39196	26.1273	18.7201	40.0112	13.6725	11.7734	29.9088	9.77416	14.4962	8.24632	24.9963	14.4547	20.4599	25.2815	26.4499	7.1064	17.8436	23.4559	38.5894	17.1901	13.0952	24.8643	47.5395	16.4499	28.7849	26.834	35.6883	2.53809	32.3042
Q14624	15156.1	29786.2	38792.1	56130.6	23422.1	36756.5	24042.9	35452.1	38507.9	21621.9	27643.2	45097.3	14776.2	23815.4	36503.2	24843.2	50277.1	38268.3	35952.8	20225.1	19646.8	16715.5	22488.5	23403.1	30222.8	26497.8	32388.1	39238.3	26086.6	28716.1	35423.5	31793.1	23031.7	37782	29073	32770.4	15904.2	4809.4	44771
Q14697	227.55	142.622	116.148	101.844	155.163	160.862	166.339	96.72	100.977	116.242	172.028	129.855	147.779	214.74	141.909	121.746	126.457	112.828	129.831	128.162	150.427	149.532	164.857	151.644	202.538	171.275	157.721	132.171	146.572	130.181	153.591	189.827	197.774	160.257	152.834	213.331	172.278	132.524	161.041
Q14764	33.0383	83.9917	44.3258	19.3522	81.2578	52.2182	24.936	20.073	23.6304	18.8817	23.7473	13.2737	13.1632	32.1355	16.2065	27.5333	22.2387	19.3127	21.3158	39.1246	12.1038	27.4897	28.0141	23.458	23.1443	23.7474	17.9748	24.8944	17.6082	18.6526	3.97652	8.84496	24.1971	9.36955	17.9381	15.1494	23.5033	22.9418	16.6283
Q14766	592.389	543.605	533.888	651.504	458.094	462.107	503.968	619.691	470.6	989.961	587.831	757.426	968.666	938.969	682.01	680.212	935.761	1512.7	858.655	651.458	662.514	505.546	634.588	588.545	594.319	593.93	781.845	754.217	849.797	705.86	594.36	833.043	797.031	1065.7	744.574	661.598	651.341	357.233	1275.44
Q15063	160.295	156.001	87.2607	141.596	70.4899	168.135	92.2551	213.628	152.197	95.7832	322.843	129.325	73.8507	113.227	112.202	183.993	68.0196	166.773	96.0101	140.228	138.013	98.7314	136.309	132.34	149.022	227.828	148.948	101.882	70.3306	168.25	188.078	89.887	126.161	157.85	127.723	121.304	112.239	108.72	86.0903
Q15155	1141.91	1128.23	918.768	971.995	2021.57	945.829	4074.96	1091.56	856.551	903.293	805.374	1179.78	965.289	838.344	1515.09	1021.18	1339.95	959.003	1496.69	2947.89	652.306	827.534	1123.74	964.97	540.07	1001.81	587.895	1134.05	616.524	772.114	945.102	896.312	1507.45	2535.21	879.993	1053.78	1364.25	1852.69	1214.59
Q15389	122.18	114.325	129.94	209.234	233.559	100.593	163.744	161.566	112.405	153.786	140.239	225.377	140.11	167.327	238.633	173.582	306.914	338.378	254.946	279.216	126.107	86.9544	143.049	127.466	97.7989	78.4431	175.128	80.6264	122.837	150.308	267.116	175.423	184.273	272.602	100.273	107.589	164.299	83.5357	281.743
Q15485	9594.57	7638.37	8712.29	4678.05	7206.46	6698.1	3756.98	10390.6	3210.69	8026.15	4568.55	7414.57	7994.45	7552.5	7262.31	9378.62	4445.37	7968.53	7226.55	5947.44	11272	4023.27	7922.33	7355.2	6496.66	4353.33	3864.87	7748.47	2873.14	4012.21	7480.61	4193.65	2606.65	3548.68	2957.06	3329.28	4365.41	1592.63	3404.04
Q15582	544.473	628.964	452.662	801.627	643.485	777.039	656.466	472.286	523.599	578.752	659.434	424.71	429.297	545.332	484.004	611.628	320.057	480.284	263.75	511.78	330.464	440.599	414.52	409.105	443.757	601.43	370.467	554.252	592.895	504.19	511.009	282.256	311.381	355.189	471.132	741.786	379.459	444.445	277.786
Q15631	75.0674	53.0311	69.4867	19.8629	56.3344	48.6768	57.9844	51.3526	67.1164	61.9095	52.5445	62.5251	30.2362	52.8132	49.678	100.096	49.8882	57.5426	40.2595	82.7829	45.5204	40.9291	31.8725	52.9133	22.3259	44.2738	54.0635	54.742	56.084	39.5012	64.6079	47.4843	99.634	36.9191	45.1552	58.1056	31.4249	40.9409	55.9831
Q15848	326.385	625.963	166.639	507.843	447.799	339.754	251.852	558.059	445.683	440.796	308.764	739.965	608.813	865.978	387.347	496.783	579.609	385.366	268.066	456.565	179.951	770.02	205.939	193.343	332.484	601.945	461.14	214.494	385.583	1347.17	2396.36	263.308	494.763	680.185	864.585	636.189	324.175	1144.2	440.39
Q16363	64.0861	43.4597	38.4777	56.1956	39.1747	42.9178	39.8351	80.826	64.6325	35.7439	88.5569	49.7019	48.7637	36.2958	36.2846	55.2333	44.3447	62.9055	43.9982	32.8245	59.6598	56.5815	51.1322	43.3659	58.4386	61.9697	78.6778	40.9195	67.5987	80.9231	93.3839	52.371	43.8624	51.1798	80.8474	79.3479	32.2526	36.353	56.6842
Q16610	602.503	578.734	357.872	925.464	616.717	1063.63	608.514	799.062	1709.71	850.083	741.863	799.247	1521.5	1346.89	664.227	719.593	706.358	785.305	687.877	1083.94	638.061	325.986	801.501	818.29	673.364	777.712	632.079	1037.29	541.747	518.229	684.29	771.414	238.744	365.425	407.755	544.594	377.597	210.494	449.163
Q16851	11.9633	22.7531	12.6415	19.1443	18.8731	18.4822	13.8576	11.881	20.3467	18.9638	15.1573	47.6619	11.3357	17.8054	6.07706	10.4615	23.5362	16.2027	7.28708	10.5094	5.32859	13.0193	2.12792	11.2021	11.4292	12.0006	18.4248	14.0981	14.6631	14.4756	10.9909	16.0822	11.2488	12.5708	11.3508	11.8474	17.2428	90.6778	17.4937
Q2M2I5;Q2M2I5	265.981	293.59	398.627	463.82	26.2866	17.5718	36.3986	69.7702	79.4354	348.212	57.227	68.5997	492.143	20.9938	264.1	35.3941	170.565	175.439	121.312	211.001	203.14	96.192	303.947	347.954	506.966	57.6003	173.029	129.407	78.39	223.164	40.0407	259.438	79.1221	168.495	451.396	37.7548	105.584	149.237	50.4466
Q4LDE5	980.269	956.846	738.298	707.746	1187.1	1383.21	906.672	1142.55	3886.14	846.604	2823.42	873.077	1103.93	918.64	616.23	1084.17	680.228	1142.28	1058.13	838.912	1104.99	1835.58	1049.35	1010.8	1089.67	1322.55	1065.84	477.491	719.212	1513.3	1358.6	897.085	800.321	824.591	1635.18	1520.87	1053.07	1678.33	670.656
Q562R1	71.8002	11.1791	202.034	51.9239	33.3945	10.9005	8.5876	1121.61	17.67	17.5467	9.04849	28.0308	3.58855	36.9346	79.6016	1412.38	46.259	259.144	839.987	134.124	783.123	12.1422	41.8697	303.244	276.117	3.74638	346.667	332.136	372.626	11.9932	399.694	475.102	206.527	383.331	188.052	432.873	49.8643	107.541	71.7092
Q59EK9	1815.33	1790.1	925.914	892.379	831.171	1270.55	1528.56	598.059	1354.56	1108.13	2133.63	1307.29	1107.54	2291.62	1416.74	885.841	1301.13	569.175	2222.41	3541.67	1324.04	2278.8	3249.75	4937.32	1771.21	2978.3	3332	2517.02	2152.75	1843.32	1643.75	2599.64	2317.42	1124.89	3508.94	3362.44	2274.98	456.576	1717.15
Q5D862;Q5D862	93.0522	55.0829	155.062	121.782	72.725	62.856	52.5402	113.496	64.233	96.4107	56.6295	68.3378	239.855	42.5397	167.305	37.0895	47.4199	59.8945	173.529	48.5713	64.1832	88.2465	138.983	80.3973	124.36	49.6732	67.6969	94.6489	70.332	76.1966	37.8364	153.865	74.073	51.3426	43.9191	41.3434	108.783	49.2193	44.5587
Q5SQ64	106.232	38.4207	152.196	88.5787	97.1397	26.6916	71.7738	66.9483	32.7779	80.8533	62.027	35.347	27.6784	55.778	43.9855	33.3969	72.1657	126.618	62.3828	53.7889	99.4373	55.5044	47.1168	37.733	48.0186	32.8997	69.7372	33.1596	143.527	59.1303	65.0322	55.5411	45.1004	150.3	71.1173	42.5143	32.4778	98.6592	43.2849
Q5T749	38.8575	68.7857	108.499	271.183	136.514	50.1276	58.7358	31.5594	26.5838	52.9368	51.8188	6.46581	125.648	57.1888	89.625	52.4587	68.3219	31.1705	59.0509	99.9695	73.6349	62.8743	64.6011	68.8196	24.6035	45.8692	30.6856	70.5922	96.3231	92.7962	120.35	97.1661	63.4427	24.584	108.889	72.3209	112.93	62.2154	65.3999
Q5T848	2279.95	1254.12	790.064	1622.08	1399.22	818.818	2371.56	252.725	399.222	1406.36	1282.16	1238.53	2184.73	1952.64	2659.29	1351	1384.37	1727.33	1583.09	1059.59	3395.14	1142.48	1736.75	2244.17	2343	1106.21	1348.14	1514.87	1835.52	1226.94	1365.66	1672.91	2885.75	1172.99	1756.25	1836.63	1755.28	143.55	2460.54
Q658P3	183.633	208.171	210.639	303.966	201.05	54.3954	198.328	139.297	193.77	121.548	236.671	61.5782	65.9944	83.0894	173.635	86.775	114.412	127.823	32.6995	121.332	158.525	193.874	144.283	98.2101	64.8147	37.867	142.23	151.641	145.354	53.4619	56.4429	56.2625	76.1289	157.803	55.6687	89.5085	69.1612	332.826	60.7935
Q6Q788	479.737	164.558	301.175	163.296	200.737	236.096	1189.61	98.3794	110.004	170.971	205.682	210.764	206.892	223.879	263.993	175.777	366.761	258.896	270.778	580.726	178.613	238.577	295.114	264.559	559.89	287.448	400.045	320.248	245.989	449.721	193.47	193.653	578.846	189.928	166.425	477.117	560.225	325.549	462.643
Q6UWP8	54.5398	43.728	71.0797	45.2207	15.8672	6.05255	29.1866	32.5686	21.6784	63.2443	74.7616	31.6328	93.3074	16.687	58.4309	12.1377	9.67489	18.1897	44.6107	24.7248	66.7807	10.3434	50.727	43.6123	44.7224	26.469	126.636	18.5207	17.8386	46.3965	45.5921	33.2875	30.2937	11.4629	31.1482	44.9324	23.7703	31.0697	22.8714
Q6UX06	98.9639	139.871	326.071	110.014	247.614	511.533	126.875	126.114	178.393	237.199	147.144	90.1451	106.234	199.884	195.665	255.965	126.991	319.208	119.699	195.712	457.328	143.58	162.369	178.226	100.64	207.983	267.395	883.455	128.188	235.047	146.166	126.529	93.8474	139.927	135.417	358.018	293.672	229.194	158.521
Q6UX71	49.8427	43.6796	58.5776	46.1673	85.2014	44.8905	44.3559	63.2181	60.7511	63.4914	90.9496	56.1463	31.4824	62.6834	18.1425	58.2848	46.5557	82.734	50.6028	23.4433	38.1337	37.5582	40.4642	40.0733	30.8451	48.8731	44.7499	81.2301	68.9296	43.8605	40.5697	39.4831	37.7121	45.0412	59.9501	74.8135	31.6417	383.713	34.833
Q6UXH0	92.404	48.1372	199.45	134.189	63.7622	60.1025	214.648	48.0729	33.8193	136.243	58.5637	52.0599	74.5998	42.7572	110.872	50.6689	32.9139	26.0417	236.767	208.287	149.754	50.1119	100.879	67.2356	193.354	48.6272	52.7993	105.915	48.325	70.3379	46.765	27.7164	72.1718	49.0796	25.5219	48.3628	92.6736	78.1457	285.638
Q6W4X9	53.1188	56.5311	53.6574	70.3037	270.341	79.3077	86.3379	85.0079	50.8018	27.0546	75.5206	37.3513	58.2112	35.4155	59.9687	46.0249	49.333	60.5941	57.8865	39.4748	50.8309	48.9675	52.9726	52.9726	58.0574	29.0098	55.1275	59.0671	77.7008	58.1595	47.0794	49.9538	62.4913	46.551	40.942	50.2206	52.0346	46.4776	58.5459
Q6ZN18	118.038	85.9059	179.533	42.9515	25.1493	70.7209	81.4289	11.6735	24.6579	39.7412	36.2485	47.0231	126.112	76.7918	222.467	29.4169	80.4021	41.2826	6.05379	220.957	149.026	106.702	119.592	177.706	104.042	155.053	258.849	99.9575	42.2615	130.123	57.8169	126.574	652.546	133.826	269.173	157.42	476.431	44.9299	212.686
Q76LX8	11.8229	50.645	34.5791	41.1793	39.6801	27.4735	21.1172	39.4913	127.083	41.9585	38.6958	67.8979	89.1635	30.8285	13.2264	30.1244	30.2015	26.9731	20.8573	18.0446	26.0201	39.7742	21.0191	21.0191	22.3179	26.6547	31.4959	28.7752	30.4894	23.2294	38.5615	26.8141	19.1598	10.8004	26.7128	24.0906	10.5955	432.682	23.6495
Q7L576	74.2958	46.5596	79.5519	33.7339	27.5197	13.3419	43.6002	33.7057	30.882	22.8299	70.1353	34.5847	13.6551	47.3404	34.0619	38.4985	38.4587	24.4314	25.0347	51.7222	26.013	30.0934	48.6384	40.6111	23.908	14.4794	48.8828	27.9418	66.2163	30.8157	35.5488	12.0386	38.234	85.3838	42.5283	15.2586	73.6821	32.7327	77.0528
Q7Z304	122.154	85.3127	66.2726	86.0643	64.4269	124.475	69.6515	98.374	99.3751	70.7592	217.742	66.2303	80.3147	69.5528	79.4933	94.3103	54.4642	75.3078	50.9757	83.3928	93.9752	112.888	79.0329	73.437	89.8536	94.7726	70.6618	76.42	58.479	79.3274	77.9565	88.0604	89.1146	58.1734	65.8696	121.932	63.3327	83.8531	76.3192
Q7Z406	10.8051	39.3379	10.7255	10.4417	16.5611	17.1806	15.8862	15.3152	21.7644	17.2262	23.6902	25.9885	5.56689	40.4868	14.8146	16.7438	13.9162	19.9194	12.1766	33.4915	14.144	10.3716	21.7216	21.7216	15.5409	15.6484	37.962	15.3878	23.6768	15.0311	17.9662	19.9365	33.2486	37.707	1.59415	13.067	16.4839	18.9793	21.6469
Q7Z4W1	27.6662	23.2386	27.159	16.0221	19.4751	27.3273	34.459	23.6213	45.4681	20.3659	33.6258	35.3179	35.8397	41.9537	15.5061	59.0548	39.7021	32.7162	20.9976	34.6436	21.2901	30.2394	23.7775	23.7775	15.1671	92.9346	28.5563	31.0285	47.9938	39.4823	53.9884	34.0714	26.789	60.1488	25.7106	28.7929	25.5674	324.109	25.5577
Q7Z7G0	395.932	531.336	308.651	433.773	388.047	504.976	259.988	480.085	400.487	402.609	477.949	308.2	725.965	496.331	285.616	436.558	275.044	572.569	282.287	529.399	564.074	465.772	461.773	494.116	394.539	464.073	692.455	572.383	882.024	526.842	344.646	613.93	295.042	474.982	408.786	499.265	398.972	387.475	324.516
Q86SQ4	228.349	170.763	227.631	191.247	187.794	152.826	229.744	195.957	159.546	250.711	133.77	257.856	176.606	227.804	206.934	249.332	205.265	190.957	234.405	212.628	286.028	187.648	187.684	186.559	250.429	169.642	152.042	147.953	168.303	150.73	255.679	191.178	213.497	197.753	173.353	245.429	260.583	240.063	255.827
Q86UF1	54.4827	64.0789	94.4853	129.137	83.5955	35.5876	59.3393	106.68	46.135	49.688	207.102	85.2828	28.4136	115.249	55.6254	107.906	98.475	182.299	59.3982	33.4634	63.7862	58.4204	37.7272	17.335	18.5772	23.2227	132.261	119.049	190.149	49.3304	14.1083	19.5007	35.1403	66.5905	93.8565	49.4848	64.5639	107.913	43.3923
Q86UX7	233.483	339.46	498.883	225.412	237.529	79.1086	345.785	199.132	165.612	123.159	346.466	233.211	146.702	614.155	421.949	256.338	312.041	295.571	221.041	386.165	268.509	210.403	287.989	279.474	163.958	101.427	265.863	205.693	313.167	196.208	71.4998	112.377	281.588	921.529	331.136	187.976	591.115	270.661	648.945
Q86W26	134.138	148.857	62.5413	115.821	127.751	50.6233	81.6243	59.3187	23.1206	22.904	49.0153	174.108	65.9945	69.3996	38.8584	51.6457	49.2036	33.9798	38.5886	62.8244	68.0712	95.127	60.163	67.0631	65.2524	29.4123	33.7182	122.816	42.6376	99.7661	48.3816	62.9116	99.3469	17.6041	75.8024	49.6766	44.1362	91.034	40.4317
Q86WI1	96.2717	152.243	82.5701	60.6533	83.9415	76.3189	172.576	120.927	41.7987	114.112	71.0746	125.88	122.767	162.211	78.0562	106.019	190.546	287.404	98.5872	71.2107	123.09	101.547	83.9058	132.446	57.8916	138.728	193.916	215.275	146.71	131.721	116.448	299.422	420.94	133.302	178.5	148.227	98.2597	86.9961	173.282
Q86XW9	36.1456	80.1796	36.4801	34.6573	123.224	169.169	53.9566	58.646	110.988	63.2839	79.4567	116.617	64.9771	90.5187	75.9395	53.8767	60.5817	48.8983	48.3613	98.8827	279.013	104.902	19.951	51.7603	37.2853	133.815	97.7286	42.2262	102.82	91.9739	255.122	120.386	77.6717	77.7946	59.3612	60.6621	18.5737	33.0262	28.563
Q86YZ3;Q86YZ3	79.6467	55.596	117.508	55.8727	23.0564	19.7866	20.9501	29.6357	63.087	106.254	72.5919	30.4271	164.303	30.3867	71.6315	19.3655	16.6308	47.0248	91.0792	51.9418	74.52	30.9777	73.3164	77.1855	98.5509	37.8996	32.6833	25.7516	26.7511	29.7984	49.2836	124.243	80.245	23.1982	30.6786	31.5922	137.924	28.6942	60.6609
Q8IWA5	90.8031	99.951	157.162	124.094	121.012	39.5966	68.0314	103.072	82.8864	88.7892	169.454	106.26	72.3893	76.7923	88.6374	77.6502	101.673	125.907	105.734	50.228	77.6691	95.7104	116.287	92.9428	49.4284	58.411	129.52	79.6908	134.423	84.643	62.5294	60.7008	65.2413	87.3686	65.8081	46.2244	86.2097	55.4912	95.785
Q8IXS0	89.1177	54.3056	104.74	62.9054	104.677	112.319	68.9889	64.2703	38.1764	49.5771	60.8195	68.9915	40.6647	54.9641	68.9889	51.9748	95.1654	66.4803	66.2488	90.8743	69.7048	88.6785	82.01	82.01	74.4333	84.1773	68.8228	88.5601	64.9468	53.761	63.5981	69.9243	73.6619	53.7482	79.3437	73.086	74.4333	68.9915	66.1768
Q8IZ83	68.3537	79.1384	61.3877	91.7176	53.3485	200.362	140.665	149.224	63.783	80.0263	71.0997	118.696	120.062	94.3747	114.627	114.39	76.2206	57.2642	66.5161	70.5435	92.8679	121.068	70.106	64.6075	115.294	105.77	62.8812	46.2723	105.41	57.7533	38.5746	166.086	63.6115	104.109	79.7042	155.419	77.0468	507.269	70.2519
Q8IZF2	58.5061	105.499	97.7332	105.547	101.311	102.659	102.307	114.553	82.9544	138.059	161.44	76.0193	87.4079	116.678	82.3507	109.902	87.3001	182.204	113.512	106.619	77.5367	75.5692	57.5174	57.3737	61.4864	98.9361	53.5898	120.147	61.118	72.0195	69.1066	63.1729	67.8997	64.4823	72.2836	63.68	46.6245	73.6824	112.911
Q8IZP0	13.7838	19.1216	7.30033	13.716	6.65575	21.1955	25.5237	14.2674	14.5763	15.022	19.1463	14.6632	15.634	23.6598	17.2571	12.6376	12.265	17.606	10.1324	10.9741	17.076	19.6704	4.1201	10.8131	12.0646	19.1143	12.029	14.9327	12.103	13.6229	21.0404	11.4364	9.91022	43.5076	11.0211	16.1187	20.5134	14.2309	10.4189
Q8N5U6	466.6	55.2407	30.147	125.179	154.986	1657.65	748.165	489.528	184.896	775.064	39.5744	342.289	599.275	991.732	344.422	677.52	322.495	339.47	553.224	544.55	550.822	772.792	352.886	251.746	686.481	832.037	405.012	126.8	77.2398	26.7955	166.5	444.794	1134.48	1790.79	53.3687	1217.25	369.755	342.289	849.479
Q8N699	634.858	609.153	1072.76	748.151	483.415	355.124	589.849	366.884	519.642	267.04	878.057	479.897	366.5	457.178	491.526	324.228	424.875	476.791	335.019	482.321	741.823	295.794	364.622	414.156	328.654	411.815	529.38	394.785	580.732	369.954	315.123	362.126	331.775	397.177	510.696	262.997	345.091	155.556	512.874
Q8N6Q3	24.3932	48.6793	32.1987	12.9539	51.4953	32.8687	49.1717	100.855	33.0879	26.3821	29.9733	42.4734	8.63671	10.1842	9.20251	87.5833	15.6799	11.3895	39.4601	13.1844	17.0452	28.3451	21.1603	29.6268	17.4033	17.2899	34.0981	28.5064	11.4776	12.4446	25.3806	9.32009	5.86971	13.6827	22.314	11.4384	58.7263	21.4875	27.1038
Q8NBJ4	25.8404	6.41469	16.9629	38.7105	15.6061	18.5209	15.2697	10.4118	10.0778	11.8324	20.4977	8.9465	16.3741	11.1751	20.6043	37.1257	14.6856	8.10737	5.29844	8.42107	17.6219	47.2574	16.8005	11.1472	36.2692	5.52392	15.9214	16.3739	23.4461	9.00148	8.35256	47.0689	18.0752	23.6695	17.7217	53.99	7.94622	32.5816	6.42706
Q8NBP7	208.298	197.19	168.906	253.897	409.87	249.518	183.057	376.412	231.731	257.319	227.392	212.217	236.414	452.288	285.066	426.844	358.264	392.751	279.992	176.32	338.191	240.991	251.608	246.397	128.319	228.513	198.82	207.103	405.148	443.646	417.328	368.873	447.434	443.656	345.402	425.503	295.186	251.754	460.842
Q8NDA2	17.5158	15.1129	9.71603	16.9469	42.25	21.9886	18.4787	27.4701	23.5809	16.9991	52.5903	29.2731	20.8292	19.3824	15.8945	12.5663	11.1948	16.5305	16.5576	11.2023	23.0502	12.2294	9.31562	7.66023	12.9395	20.0592	13.2636	13.2998	9.86589	17.1159	19.109	14.4893	16.266	13.0461	19.54	22.7371	12.7631	39.1963	13.2249
Q8NG11	58.2462	82.9135	152.383	121.473	80.425	29.7039	70.0944	125.448	42.6262	69.8565	124.812	53.8832	37.6259	54.2197	55.4718	134.57	68.7337	164.008	60.5835	47.8456	36.6428	34.1519	46.835	36.2128	42.7541	53.3109	92.4633	164.358	182.392	33.1296	90.6226	20.717	44.9004	55.4242	49.3792	47.7305	34.2551	35.8084	56.2569
Q8NGK9	1.65752	1.20072	1.20167	2.38781	1.01317	1.72506	2.46501	1.36533	2.87658	0.724297	2.19288	1.94726	2.17707	1.24808	2.35457	2.38453	1.98803	2.22499	2.28526	0.970959	2.53966	1.69194	0.734031	1.74955	0.950134	1.21803	4.10084	3.12508	3.96357	1.30753	2.28446	4.56995	2.83749	2.35724	2.85514	3.53444	1.68424	2.62841	1.74955
Q8NI99	432.012	662.134	292.998	360.464	274.925	834.768	429.971	488.102	635.049	369.817	412.442	651.56	539.69	515.097	547.485	544.381	436.096	502.044	426.958	415.783	352.045	416.568	538.814	544.36	346.873	625.001	421.136	449.697	409.697	539.688	439.483	426.812	408.023	381.299	472.693	546.542	259.496	1657.93	427.265
Q8TC71	502.989	124.121	244.062	113.769	173.695	265.901	423.067	189.346	28.176	227.452	285.504	85.8264	191.32	156.76	364.256	187.424	308.9	216.771	633.31	620.08	247.537	274.895	346.644	452.358	457.365	283.503	341.871	139.443	275.529	314.906	219.483	80.438	725.853	360.78	129.317	240.8	766.626	94.1918	645.805
Q8TD06	190.75	102.981	140.243	337.83	147.941	167.332	89.305	106.01	52.7724	118.81	80.8638	113.461	84.6461	103.347	222.829	109.558	69.1248	61.4131	151.385	80.2924	134.299	89.3005	88.4589	150.508	106.721	174.337	63.0616	127.578	128.755	54.9856	145.62	99.0089	400.016	149.122	149.976	139.105	108.766	91.5877	206.242
Q8TDL5	257.221	180.064	287.751	233.403	228.313	173.089	219.589	196.584	212.086	210.748	213.768	238.082	253.55	198.769	242.02	207.072	217.591	233.663	283.18	284.86	197.737	219.387	198.96	231.753	182.513	146.764	226.475	246.906	282.946	183.304	224.671	230.697	199.449	145.462	223.739	88.3588	302.33	221.854	238.768
Q8WUJ3	167.586	227.405	152.444	257.25	155.651	352.873	197.7	313.067	352.934	209.758	354.615	330.895	172.888	200.58	177.688	257.168	220.547	193.536	238.543	134.392	181.087	115.405	136.377	126.822	190.976	331.828	191.403	370.917	240.092	248.38	204.417	200.777	173.153	162.329	195.18	395.159	153.537	91.2982	134.45
Q8WUM4	77.2448	73.7806	115.443	88.506	62.3872	48.6144	56.8301	44.9265	45.2135	59.205	59.7341	47.0488	39.732	45.4427	55.278	36.1062	45.9257	51.1695	39.1101	59.5509	74.9393	45.748	107.264	84.0983	58.2453	34.398	65.359	55.5781	65.6316	78.4138	46.3178	38.0604	72.8067	64.3874	56.8142	35.0227	65.6963	8.32129	101.79
Q8WUW1	54.5506	50.9451	93.9751	60.128	33.3428	39.9246	35.5925	29.7889	29.4543	16.0479	70.6591	31.223	16.1829	42.4873	35.476	49.8038	48.4995	34.2072	23.2721	38.5435	52.3232	42.6293	35.0066	20.071	38.5385	7.27174	39.7476	24.3016	51.4977	8.312	23.3166	8.48429	27.8031	81.9754	63.4943	12.9915	52.3201	32.8988	46.8654
Q8WW52	81.0369	124.755	101.161	598.555	209.294	55.6904	72.7118	41.2754	217.384	111.769	47.5886	35.0505	19.8437	20.6386	89.9252	120.396	37.0387	65.065	21.4179	86.4267	18.0329	66.5827	74.7181	59.5883	127.526	113.338	12.9416	83.019	46.2879	29.6803	45.011	27.8525	37.9744	109.18	11.6769	17.0569	48.7298	21.3516	209.161
Q8WWI5	60.6253	61.8364	151.615	72.6469	56.8268	25.0933	65.1232	54.5873	39.7931	48.6228	123.327	43.4131	27.2274	42.1764	55.3574	60.6211	38.4292	77.2251	77.2537	38.5984	47.1573	38.088	41.5192	40.2201	51.5972	16.1074	97.7955	34.7462	104.505	43.5226	10.6281	20.9215	34.7569	48.0761	47.5155	21.3221	61.966	15.7183	38.6164
Q8WWZ8	140.3	254.124	210.302	304.095	356.68	866.833	181.874	204.336	300.1	243.585	208.32	283.128	238.908	235.331	199.26	227.743	377.628	226.168	170.332	146.678	243.822	289.761	457.655	431.674	210.877	455.613	170.087	301.465	220.853	98.0449	336.162	146.931	80.1692	105.368	146.558	76.9613	103.649	563.197	74.5243
Q92496	278.647	77.486	246.391	169.457	136.673	80.4317	424.443	95.7344	35.204	301.549	191.721	161.68	347.211	201.919	341.419	124.433	200.429	224.977	404.719	79.3811	246.989	147.455	229.333	285.928	366.202	142.05	177.494	176.818	138.8	146.538	217.819	335.228	385.881	333.54	224.839	137.474	399.63	159.045	585.439
Q92954	3004.23	3041.35	3166.92	2930.4	2420.05	3502.24	3944.65	4282.48	2119.57	6532.97	6713.8	3343.33	7567.82	5103.55	6312.83	8300.34	6390.07	13093.4	9725.39	9320.36	2209.59	1455.52	3304.44	3104.35	4473.54	3498.52	6542.31	9002.56	3335.8	3144.08	4642.22	6010.39	4976.07	5791.14	5237.98	3230.45	4873.84	5711.85	13453.4
Q96AP7	59.5229	59.2769	104.73	101.114	39.7684	35.9016	53.7145	46.6606	57.1014	49.8415	93.6454	30.0197	41.5327	51.5023	66.7272	52.4439	47.6751	56.5751	42.1987	68.6629	56.4151	67.413	44.7685	40.0824	51.5484	49.2148	50.6033	77.9659	28.7772	55.7834	21.6047	27.733	53.3363	82.5294	58.4814	44.3275	53.2589	48.7492	67.6915
Q96CX2	66.2557	18.6831	92.4514	395.873	111.987	31.8634	63.5511	20.0738	30.5784	97.3877	60.6714	216.753	73.2451	134.064	168.787	9.41539	49.0742	47.5008	35.1598	642.072	60.5072	41.8469	15.6001	104.97	66.839	67.1179	10.8916	31.7455	46.7225	60.9706	28.8193	24.8351	15.0848	162.807	38.3216	27.2308	23.7364	27.5418	42.8962
Q96IY4	98.1503	157.26	166.649	132.953	128.801	136.666	312.749	186.61	143.772	81.7719	86.6787	225.795	129.832	104.067	186.014	198.767	212.792	138.11	123.508	243.292	54.958	52.7684	59.0745	63.6325	59.4636	93.0264	74.2402	84.1049	87.2295	46.19	25.1564	74.6832	82.4833	49.8915	77.0264	91.0219	53.2598	104.281	135.308
Q96KN2	25.0842	46.3901	11.0109	131.545	28.9751	23.5585	80.1313	43.1296	22.8011	62.8452	44.7709	31.6271	24.3982	29.3129	24.8912	8.11383	41.7942	79.4609	21.632	23.4534	34.8991	26.3025	19.5926	15.3722	17.8494	26.1067	28.9684	46.5881	15.9767	58.239	29.6959	28.0701	46.9728	20.0119	50.7801	21.9788	23.3744	145.196	17.1176
Q96NZ9	56.0676	74.5946	42.9646	139.132	105.274	87.9267	15.2336	10.1528	60.0708	9.10713	43.2651	51.2013	51.2754	30.4339	30.1496	128.882	41.4779	90.156	52.1797	51.5461	64.4198	45.7497	4.21256	27.8509	70.1328	124.435	54.3444	53.5196	51.5833	58.5281	24.4172	65.3026	168.11	97.6834	28.1654	70.9811	28.8407	35.3794	44.758
Q96PD5	342.756	242	363.302	267.049	232.442	293.613	386.825	332.969	267.304	323.474	339.055	515.312	396.099	425.141	311.881	322.392	359.254	328.002	342.712	356.3	334.189	394.447	289.92	321.059	283.176	399.174	407.577	437.809	264.271	413.889	251.829	293.055	398.113	282.659	329.151	397.548	254.235	544.981	357.458
Q96RW7	205.852	277.977	197.187	364.23	394.53	327.035	236.636	298.055	777.184	347.945	364.057	264.374	205.693	333.666	206.916	216.53	189.985	302.685	177.814	168.756	242.741	244.163	188.061	183.087	250.467	295.305	184.795	225.928	269.627	259.786	248.186	185.011	175.57	169.531	222.856	274.902	157.13	369.362	141.802
Q99523	113.838	53.1905	84.9043	118.284	177.071	85.7472	112.207	65.3676	38.3821	103.706	64.4245	88.2967	96.8418	112.49	91.6976	90.944	94.7053	101.103	91.2885	25.207	234.891	131.857	86.0881	95.3434	100.484	77.6987	94.3141	122.982	183.552	44.0207	101.39	96.3822	80.0433	113.765	127.088	107.735	56.8436	65.2443	106.097
Q99611	196.725	118.069	169.839	168.999	90.6528	43.4001	164.116	70.7206	90.6846	104.874	117.53	106.562	81.9192	103.891	159.609	41.2304	36.4276	18.4309	126.812	121.159	169.643	106.709	108.331	105.79	54.5271	82.5507	107.886	83.7436	47.7152	65.1642	31.1452	32.9919	220.533	28.512	93.0215	42.1414	134.341	18.2958	187.41
Q99715	47.9478	66.5113	51.6347	110.426	64.3723	73.8415	38.0758	67.4855	114.941	76.5154	114.553	81.892	76.9935	86.4946	47.9334	115.189	59.0077	62.6978	34.7752	24.0223	48.1297	52.012	42.9082	27.4805	33.0122	84.7264	28.2829	32.992	62.1697	62.0729	85.4912	47.4614	41.5991	59.05	35.5532	74.1085	38.7872	87.9086	36.9618
Q99784	56.5524	42.1853	36.7104	57.5318	49.0348	37.385	39.9995	63.1132	49.8135	44.5795	26.1713	62.1119	30.3256	29.89	44.2965	83.6894	803.398	47.3801	49.019	53.2726	103.833	24.6119	29.8677	30.2637	31.7639	47.0178	22.3673	33.9063	40.9406	63.1817	99.0302	52.3806	59.6578	45.3938	51.086	59.1465	67.1431	157.905	29.1776
Q99829	87.0367	69.5059	106.108	50.2421	69.7178	41.0558	104.43	56.5889	82.3192	61.128	209.617	80.339	19.0627	95.2236	89.9494	80.0732	66.8264	86.9353	37.3866	32.2669	28.6761	76.27	40.9669	33.9796	54.3181	68.6029	143.948	82.1641	69.2121	48.5892	73.0161	78.0573	76.1803	64.637	118.058	80.1394	46.1392	95.4181	65.7619
Q99832	44.0322	102.071	77.5206	26.8915	88.936	38.465	78.112	71.3864	120.135	70.2454	37.4455	128.948	75.5566	98.2805	58.61	232.797	108.043	91.8449	134.249	71.5245	154.611	89.0215	49.0765	85.9595	53.9327	90.1609	99.2386	78.603	104.398	77.6649	244.5	96.3969	68.9972	63.9672	77.5894	58.9122	73.3086	83.7281	59.0182
Q9BQE3	256.452	219.16	251.287	129.095	246.505	124.646	163.219	192.616	109.463	232.369	254.522	152.158	168.676	477.088	209.843	293.552	228.63	194.1	179.686	426.638	351.269	743.636	193.554	221.136	131.781	149.81	159.738	115.75	307.211	132.636	274.654	172.074	276.772	523.477	187.428	369.391	388.657	691.501	260.848
Q9BS26	50.9897	64.4912	92.0503	45.1333	66.3997	89.4292	43.6286	27.3725	57.4889	19.2953	44.7501	54.9098	64.6051	65.7798	52.372	73.8287	56.2748	66.249	42.4141	60.723	46.454	29.4672	77.9487	42.4873	115.003	44.2241	45.2454	70.1978	51.6889	37.6962	47.5244	62.8373	67.6074	62.8134	49.9628	27.2197	44.5267	54.9098	132.901
Q9BT09	34.7906	40.8329	35.2772	40.7879	45.6442	58.9646	21.6717	28.3572	32.5209	39.1247	46.249	54.4985	50.1316	35.5891	52.1588	47.3063	44.165	49.9045	49.2025	9.24368	8.54443	41.6276	33.6379	24.037	59.977	28.7879	30.618	35.4915	33.8878	37.9818	10.2177	49.9416	27.0309	35.8385	32.5233	62.0053	39.7273	37.454	34.7432
Q9BUN1	298.609	163.648	112.835	126.497	210.217	107.658	259.375	114.965	105.983	185.456	155.787	173.65	238.685	153.166	130.091	194.54	261.206	164.158	244.241	258.582	171.379	233.001	158.784	177.766	189.932	173.206	268.299	71.5872	131.203	135.609	150.858	213.096	227.05	92.8621	158.793	146.267	192.833	36.9099	225.447
Q9BWP8	815.15	1309.27	677.463	996.888	677.06	1227.09	792.37	1152.89	1818.94	921.676	622.158	1096.94	866.054	974.133	775.485	1140.65	772.048	922.891	869.47	799.887	475.48	476.482	1071.88	880.113	571.32	924.244	678.097	795.316	714.589	962.654	708.867	594.173	602.043	776.686	603.126	703.119	840.45	1827.71	583.269
Q9BX67	27.0115	26.9249	35.7872	31.1345	43.3157	42.6648	35.2465	25.6092	12.1519	31.8555	64.9994	19.0421	20.6891	38.9441	26.0243	55.5835	44.3819	35.6996	26.3891	9.22454	30.1394	35.3647	30.5473	16.3702	29.5575	37.3828	35.0498	28.9797	59.8439	20.2973	32.0564	18.7989	13.4716	67.6178	23.5984	16.5687	52.8345	36.4029	51.9915
Q9BXJ4	18.0541	14.4044	4.25934	15.406	59.3579	50.4246	27.4687	98.1242	37.9162	243.542	199.316	56.2166	80.9597	46.0789	63.2046	120.243	141.113	110.472	41.6401	89.8997	7.50305	24.3339	14.3034	14.8648	29.1959	75.8952	53.5886	32.9256	27.679	150.829	56.5844	32.543	34.3764	84.0486	46.512	28.917	51.9056	279.599	29.7209
Q9BXN1	96.3461	83.3831	46.0605	94.7266	78.229	100.728	58.0186	89.5993	85.9928	76.3558	130.481	56.9962	94.5431	71.964	57.1662	64.2193	53.055	74.2714	54.8141	101.55	157.897	88.0399	58.6201	43.0615	87.0767	97.1454	74.627	73.3556	72.1587	132.293	47.2046	91.8561	88.419	59.3218	144.098	85.0721	81.1946	107.666	69.6728
Q9BXR6	70.1798	77.5965	156.021	144.422	166.475	62.1357	171.238	141.212	60.2549	113.395	54.3153	121.822	121.92	202.861	113.112	118.785	66.6023	133.289	165.458	62.1722	47.1133	34.6758	53.4328	39.0957	34.5272	45.868	33.5822	49.7715	40.4966	39.1307	50.3393	56.495	71.9393	47.262	38.8773	69.7491	82.1691	45.5123	86.3053
Q9BYJ0	92.1823	73.4365	65.9007	40.0117	57.7261	37.6881	99.8396	32.7601	48.3637	73.0784	118.185	57.0636	72.529	58.8683	98.3105	66.0371	64.9045	57.7312	145.008	97.8181	115.421	73.9691	120.148	112.563	160.872	88.7305	176.048	101.803	91.3157	70.6612	77.7119	86.2217	138.355	111.172	79.9155	92.9393	210.401	49.8647	108.631
Q9C0H2	87.5634	82.5226	142.805	164.442	160.071	46.0851	73.251	67.7444	62.7709	42.4364	144.035	40.2086	54.0693	52.2527	71.0262	54.3188	74.0861	112.78	59.8429	64.8918	103.05	45.3918	48.1741	41.7221	38.3102	47.2187	55.8515	60.5687	120.159	51.0538	63.815	49.6757	57.4108	62.8047	59.2484	40.7059	42.9365	18.5107	53.0704
Q9H0U4	49.2608	28.1382	90.5828	52.9321	36.2119	41.2911	21.3628	30.4097	13.0302	30.355	18.2861	26.939	15.719	17.4398	34.2079	70.7118	27.259	19.1841	138.824	26.5762	60.5102	22.9448	43.8799	22.0134	30.6832	17.6717	50.7669	53.2766	58.088	18.5661	59.3766	24.9598	43.8337	96.722	26.2602	9.097	77.7912	60.6618	39.4416
Q9H299	128.939	82.8812	108.342	75.7022	67.1137	35.9106	70.3559	51.212	88.8221	100.069	54.8453	51.1089	33.3295	58.6863	57.6922	85.7553	50.6733	25.7553	42.7086	87.1242	65.1994	56.9952	49.2059	13.8203	92.5537	59.6906	36.7596	42.6	78.8217	25.5244	53.1419	46.5621	56.3986	169.099	36.8218	39.5127	217.035	72.3906	84.6555
Q9H4B7	61.1182	74.1828	84.1752	74.8014	69.5832	33.7789	50.8433	62.2014	43.6495	51.8628	66.2466	73.3202	45.693	191.719	78.6481	105.518	116.183	57.6333	74.2062	156.244	114.81	218.79	77.2685	67.7745	46.4407	69.6632	60.0083	44.0454	156.627	49.9184	84.3454	50.3782	89.8018	178.909	70.2885	171.941	178.346	358.246	103.203
Q9H4G4	93.1648	55.4099	110.508	61.0868	84.0273	21.6288	27.9018	29.5057	18.8168	26.4698	33.9272	47.4652	38.3454	23.7718	51.0254	32.174	22.1895	24.1976	25.03	41.861	76.7224	27.467	96.7563	102.567	81.5789	19.7429	30.2681	14.2128	17.2617	29.0727	37.3104	17.7637	18.9308	88.4266	43.1887	33.0012	81.5147	54.3972	126.85
Q9H6X2	148.635	79.0132	101.884	70.021	71.9247	117.863	129.55	113.841	68.3976	132.294	122.223	168.579	135.636	85.4865	106.933	109.487	178.13	116.666	83.6872	91.3797	194.797	65.4503	106.955	65.5596	103.344	162.664	101.591	89.3455	126.824	91.1335	125.21	68.8516	164.827	28.7989	130.002	114.998	74.8998	120.255	94.8486
Q9HBI1	51.2768	45.8631	69.162	60.6087	35.4646	50.2955	46.4596	28.6524	35.3001	49.0668	67.267	44.3153	45.7007	95.3956	67.0025	60.0162	73.2734	43.1771	56.4235	56.8838	68.1326	51.1504	42.4266	46.2177	35.5564	34.2112	51.2388	52.7239	45.1756	37.9992	68.1084	30.2293	56.8184	191.813	52.1618	64.4107	79.823	77.1692	89.9385
Q9HC84	28.8066	47.039	36.7744	32.3346	25.0689	16.9373	30.6373	33.1023	9.6932	47.1776	21.0142	47.5679	36.4832	38.3726	85.047	126.486	95.6632	40.8075	32.89	101.207	156.972	55.4893	112.826	115.177	23.0573	8.81865	137.01	66.2625	108.046	48.354	43.9789	37.568	68.8025	49.4302	49.83	48.1874	25.2903	49.3472	72.9784
Q9HCH3	252.774	106.894	302.427	166.529	145.048	196.903	105.145	211.966	122.921	148.587	126.391	227.154	169.056	112.282	159.96	108.144	133.767	98.4129	56.0093	220.322	84.1743	222.541	130.153	90.018	62.6468	308.337	69.5236	82.9038	119.873	64.9955	62.489	124.465	50.6444	120.785	181.676	100.919	252.688	183.328	228.462
Q9HCU0	68.3133	51.2251	56.3759	68.0322	48.6537	48.502	67.3737	140.495	76.8616	117.304	116.372	110.428	121.722	87.0325	76.6968	148.009	79.8687	92.2467	75.337	42.5687	165.826	59.7349	71.4832	56.7759	74.3405	87.3894	89.1541	29.0094	118.899	105.615	151.155	110.789	72.8137	75.2821	92.6948	66.3406	82.9879	92.5961	73.4319
Q9HDC9	464.288	430.053	584.374	524.78	461.987	522.895	640.471	433.326	261.789	555.975	384.362	723.628	806.253	830.265	611.074	453.599	580.167	796.788	756.201	486.068	555.803	548.323	663.249	593.336	565.32	469.679	693.302	410.67	887.142	388.707	742.384	509.58	586.137	421.837	585.505	517.81	477.77	245.619	747.894
Q9NQ79	80.5171	141.834	132.132	106.268	101.867	153.551	142.048	91.5744	67.7724	114.411	93.1667	180.594	178.518	182.834	195.57	83.607	166.359	128.252	121.081	178.607	110.265	93.4694	108.562	99.1375	134.29	136.222	103.128	84.7392	118.309	131.92	83.9582	105.38	131.264	136.939	113.587	100.645	107.394	274.888	168.034
Q9NQC3	24.5261	53.7508	17.649	30.7038	27.1155	16.1372	49.4731	33.8738	48.3706	14.0904	60.104	35.0748	38.7222	94.9384	46.603	30.2104	41.9766	32.1822	40.1387	34.4555	8.7075	53.5561	20.981	39.0477	15.3757	22.3763	27.0566	37.8471	81.0226	80.3362	15.3293	43.5492	14.2542	51.2254	37.136	15.7475	47.995	20.2678	25.4122
Q9NRC8	4439.23	2303.69	6974.22	1579.47	2509.73	1520.62	3896.65	302.503	716.374	1454.41	1864.46	2121.53	2279.36	1295.16	3874.86	718.827	830.719	712.025	3762.19	4330.58	3890.15	4126.15	4476.56	3593.59	2519.7	1422.64	4340.31	2718.89	1096.33	1328.31	1811.93	1654.68	5866.25	1720.51	1820.15	2354.5	2475.34	382.936	3347.32
Q9NVM1	41.818	63.5066	99.5214	68.0428	23.8689	5.23982	53.5283	17.8826	33.8919	16.0792	87.6971	35.4481	33.8331	76.4103	20.262	25.8645	37.1671	30.1684	25.4079	32.3468	40.5196	35.6398	28.2063	38.7617	20.979	23.712	43.7031	44.4675	32.8319	37.8358	8.99849	20.5531	26.2917	22.0742	34.9926	29.1197	22.1947	6.09123	29.4275
Q9NY97	51.7418	46.6539	33.9569	49.7324	43.3131	67.6928	21.6049	91.2516	66.641	44.1224	110.409	54.1427	36.7926	101.085	41.5928	50.0525	49.4592	94.636	98.1676	53.6707	105.351	34.1456	72.0113	59.6442	20.7278	76.0041	62.9867	75.3823	74.2426	66.7175	106.352	57.1692	54.1456	56.767	50.7619	70.9145	105.407	29.001	42.1354
Q9NZP8	116.596	101.306	141.962	162.629	111.057	90.3973	174.624	174.522	94.58	153.633	121.783	155.985	93.5042	131.49	128.333	125.685	170.146	161.215	153.278	131.501	160.189	131.67	129.633	150.845	125.142	107.829	135.925	119.725	98.174	127.481	142.846	128.896	183.322	116.302	117.874	108.6	95.1843	95.7135	152.789
Q9UBS4	28.3002	14.3831	52.7057	15.7759	9.50208	32.6457	8.18455	22.6602	19.5056	40.7403	13.1287	33.4354	32.6822	12.1148	22.6965	60.8944	92.3112	11.8627	52.4971	18.7815	40.5247	40.0705	30.2531	8.439	19.2878	11.0551	27.4921	35.9026	16.1428	35.8579	48.1055	27.1395	23.0746	20.4734	34.6535	7.48356	23.363	38.7776	11.1521
Q9UEW3	470.487	400.675	235.558	386.319	541.125	495.214	472.224	411.453	373.78	425.95	819.025	477.719	621.358	510.405	465.146	486.03	205.23	376.496	276.489	383.987	304.046	355.095	360.535	378.072	533.44	461.086	403.686	389.406	255.217	353.224	499.124	353.71	332.681	429.96	452.082	386.866	264.383	954.57	226.475
Q9UHG3	4128.03	2853.66	3656.17	2403.83	2182.02	2380.18	3475.95	1707.59	1518.35	3185.18	2646.06	2564.17	2697.44	2501.82	3693.68	1727.03	3183.44	2303.1	4845.85	2405.73	3101.04	2546.18	4271.76	4236.01	3423.23	2729.06	3611.92	2459.82	2273.22	2443.69	2556.02	2727.12	3463.27	2540.52	2951.56	2461.61	3817.82	935.535	5400.92
Q9UK55	44.2218	54.7839	52.8827	88.2944	79.7364	58.8069	45.279	37.412	51.4398	38.1205	48.0208	72.9594	56.4765	83.5257	35.5255	93.6587	42.5633	66.0824	57.1119	41.8894	74.0559	21.7197	40.0264	46.2158	30.2369	61.6975	63.1591	69.9921	76.2937	55.7935	69.808	69.0013	88.2225	77.7955	43.7737	19.8816	33.4825	46.7067	56.7185
Q9ULC0	102.268	60.3225	57.0036	124.619	80.1287	48.3992	50.809	35.6345	49.0979	16.4252	22.954	40.7158	16.9231	23.6857	63.8448	52.773	14.7196	66.8645	64.5184	65.4446	53.0853	28.3123	195.191	89.8551	68.0604	30.3932	28.0471	44.1674	6.29934	46.6955	12.2735	20.5433	66.5529	87.8524	26.763	36.2068	51.1487	16.7141	58.2647
Q9ULI3	103.926	159.732	133.048	155.513	95.5081	89.2086	89.0297	93.4987	74.6717	80.4334	118.531	104.068	72.3673	83.8213	100.956	95.138	93.0898	98.3448	88.8498	105.715	115.773	69.5312	126.936	114.624	74.3999	85.3488	94.6138	112.261	150.535	140.134	105.563	84.9672	95.1224	99.0109	80.2909	67.391	91.842	96.4146	103.577
Q9UM47	87.5441	79.7083	53.1879	86.4884	76.5139	129.345	110.826	137.339	193.336	126.834	128.275	172.439	111.578	156.138	107.042	162.143	136.694	91.165	105.96	54.4923	138.784	114.81	80.4222	70.6016	75.6796	152.938	83.934	76.2764	117.438	134.652	197.522	125.984	127.842	93.3322	115.664	210.264	98.3011	248.905	85.7702
Q9UQP3	59.036	59.6379	43.2449	106.694	123.296	72.0041	61.5457	91.1947	114.016	75.3694	58.3295	159.066	65.0963	37.3151	43.2365	90.8325	48.5147	41.8378	62.3313	54.9956	46.5659	48.1371	57.4706	44.1633	64.9542	80.2822	63.1013	80.6587	49.854	70.0228	96.3438	44.7196	51.196	93.2388	52.6452	121.784	84.1557	99.4526	49.8118
Q9Y265	32.1287	26.3262	31.9225	16.6702	37.9825	29.8229	40.8972	27.1058	35.6817	37.7093	39.6365	38.3572	29.2833	46.8918	26.9751	64.6338	21.0007	40.155	23.7542	36.7313	47.9447	39.2472	20.1531	42.7639	39.2108	21.3294	75.8493	33.7842	57.1563	29.9712	54.6688	45.6287	37.8522	38.5529	38.4342	44.0679	23.6776	44.2836	40.2961
Q9Y274	37.5898	14.1623	40.3959	30.5176	16.8225	14.8289	26.7596	19.7315	17.9477	26.8792	45.9324	24.4985	36.8815	32.3369	18.6283	19.6341	32.0373	37.66	20.2792	27.68	37.5389	10.1477	31.3695	29.7556	29.2326	25.3241	31.2677	23.1057	49.1775	23.8339	20.9653	11.3128	22.7873	33.4575	43.4321	27.4365	29.2317	29.78	36.9213
Q9Y2H6	5.82429	11.7558	10.8947	11.7617	8.29276	32.8167	7.3468	95.0098	12.6066	25.8352	13.1303	10.1998	23.468	9.02505	10.0963	96.2622	2.49314	8.4739	10.4113	14.6726	43.9826	4.94008	4.57322	8.77847	7.7161	7.29864	11.9613	10.0963	15.2477	11.4566	20.7089	8.93917	9.07185	24.3231	22.7513	13.9531	6.09861	14.1959	9.45523
Q9Y315	57.4207	67.366	48.5418	71.3204	59.8006	218.789	124.584	160.524	34.9378	68.1138	90.8538	71.246	94.9634	73.1856	104.097	93.3739	49.1658	81.8083	57.7925	73.9474	72.1373	76.8812	54.7861	45.7128	122.78	114.509	58.9407	66.6399	79.584	65.6422	58.9223	132.635	49.177	138.51	38.7794	118.728	69.2718	553.884	57.3615
Q9Y490	128	173.851	258.225	100.901	148.677	49.4114	165.068	133.631	97.564	66.1704	162.269	149.639	67.2714	434.876	227.622	160.097	275.672	184.73	133.059	300.315	140.948	123.504	144.138	135.777	77.0309	54.2325	153.887	127.231	208.202	88.5037	67.5619	91.4546	226.505	999.047	239.451	203.458	475.969	320.854	312.576
Q9Y4L1	14.4877	17.6271	15.9108	11.1906	22.072	8.21696	11.7358	5.49772	26.9994	15.0123	9.66301	13.7592	7.2042	23.4814	13.2433	66.9485	16.0192	24.0883	6.11668	13.8816	18.0074	11.8989	11.861	5.99094	12.5845	16.5698	13.1848	13.4771	23.0748	16.9049	40.3913	13.2346	10.6686	3.62729	15.0162	23.4092	21.2189	22.7698	12.312
Q9Y5C1	80.2334	81.9782	103.988	76.8679	82.1476	63.2136	60.1017	52.5511	87.9196	75.812	38.6469	85.1493	86.9116	121.581	105.747	85.9348	97.8435	81.2596	191.075	79.728	114.781	122.19	107.905	80.2698	107.905	94.4061	108.908	123.675	69.1731	92.3989	97.5253	71.8553	113.472	103.854	118.125	88.7897	103.293	61.9269	74.9806
Q9Y5S2	535.393	213.498	1047.12	322.382	296.788	351.756	321.65	57.8558	54.3531	470.236	169.255	330.587	175.947	240.697	293.937	144.418	212.744	324.643	303.615	154.595	279.954	135.518	310.936	72.8148	383.779	338.837	180.081	2506.69	209.591	165.574	462.631	174.665	303.116	180.104	258.496	387.386	64.6207	2542.82	91.4098
Q9Y624	110.227	124.222	204.777	127.052	166.564	84.6375	132.716	126.313	87.5823	79.1956	161.248	86.6634	103.434	132.902	102.025	88.1959	98.419	129.224	71.2156	115.468	88.3041	103.499	132.602	97.76	66.9504	57.6518	125.738	73.4082	212.982	79.2652	77.2349	62.2717	111.537	200.421	123.472	94.9116	172.563	227.691	204.759
Q9Y6C2	35.0621	27.1958	26.3676	30.9727	45.9073	39.8586	48.9962	21.4814	40.9411	41.3611	39.9349	38.1084	53.3962	36.7992	30.5364	31.4107	32.3409	98.7249	33.584	23.8985	74.7105	87.3035	50.9682	56.5395	33.4073	36.2439	26.0602	31.8224	26.9084	71.118	37.2582	56.4141	30.3814	58.2815	41.7976	33.2783	31.2024	43.6632	31.7632
Q9Y6N6	20.6653	25.6789	32.6227	25.9936	46.5983	42.3292	18.1979	40.8509	88.2049	23.8814	39.8887	25.3448	26.0177	30.0114	26.1633	30.3281	22.5521	15.5882	17.5814	21.5717	23.7085	16.6634	24.6564	7.65976	30.4712	42.8489	19.7439	21.2216	21.5648	23.0356	18.5544	21.0531	19.0021	24.8077	9.97	32.1593	28.7177	45.0052	17.7027
Q9Y6Q9	15.4235	5.70512	3.0937	7.27583	7.95052	4.51174	7.17823	11.177	6.44467	6.06422	9.33213	8.9307	12.2085	19.4987	13.4786	4.18694	5.88483	4.78385	27.3642	8.63733	10.5884	5.97301	15.9382	9.34872	4.0414	2.996	4.27721	7.0713	6.75913	9.65004	28.1125	10.2199	1.9393	3.37675	11.4769	15.5563	11.3019	1.4979	2.9155
Q9Y6R7	20481.5	29810	9311.96	17563.2	30237.9	32969.5	14078.9	26812.1	55727.6	30209.7	21582.7	34596.5	27266.2	31511.7	18206.1	28020.2	20677.2	19632.6	15940.9	16369.3	21905.1	27997.9	18170.3	19476.2	24539.3	27291	20886.5	19950.4	29425.2	36246.9	26971.5	38092.4	21942.9	18819.7	24793.7	42786.7	24345.1	34189.4	18475
Q9Y6Y9	150.796	172.401	156.198	248.034	183.01	156.58	143.233	107.666	266.158	151.899	137.569	234.416	146.812	167.023	143.233	179.392	134.254	90.192	162.049	156.344	132.368	152.128	64.6609	108.22	108.22	139.879	49.8273	143.233	104.486	130.807	55.3132	123.716	100.063	172.587	133.997	225.893	108.22	157.449	108.22
Q9Y6Z7	1325.72	1315.61	777.134	1211.41	808.449	1662.2	1017.88	1659.95	2292.06	1051.91	796.518	1633.51	1237.01	1357.53	1284.8	1564.03	985.488	1322.81	1147.96	1056.37	798.293	698.781	1210.73	1048.12	853.733	1262.78	909.883	722.122	845.969	1399.79	1171.4	1028.66	914.225	1061.41	1006.57	1508.34	835.639	2576.16	964.318
