# Supplementary material for: A comprehensive view of the molecular features within the serum and serum EV of Alzheimer's disease
Source: Royal Society of Chemistry journal article supplement (doi:10.1039/d4an01018c), 2025-01-01
Supplement: d4an01018c8.xlsx [file d4an01018c8.xlsx]

## Sheet: serum
gene_name	log2FoldChange	pvalue
A0A075B6H9	0.697943	0.00214793
A0A075B6I9	0.915694	0.00495657
A0A075B6P5	0.604233	0.00895992
A0A075B6R2	0.947062	0.0364872
A0A075B6R9	1.51384	0.000150042
A0A075B6S2	0.70123	0.00162339
A0A075B6S5	1.0057	2.78939e-05
A0A075B708	0.989913	0.000171353
A0A075B7B8	0.991894	0.000358782
A0A075B7D0	0.604203	0.00318992
A0A087WSY6	0.945739	3.55968e-05
A0A0A0MRZ8	0.744575	0.000263442
A0A0A0MS14	1.2915	0.00849019
A0A0A0MS15	0.654221	0.0146211
A0A0A0MT36	0.752431	0.0443003
A0A0B4J1U7	0.872453	0.0123311
A0A0B4J1V6	1.02387	0.000113298
A0A0B4J1X5	0.836582	0.00419527
A0A0B4J1X8	1.38752	1.4938e-06
A0A0B4J1Y9	1.20906	0.0012049
A0A0C4DH25	0.826663	4.86297e-06
A0A0C4DH31	1.03577	9.59309e-05
A0A0C4DH32	1.31849	3.75967e-06
A0A0C4DH35	1.11848	0.0018798
A0A0C4DH36	0.7308	0.00257814
A0A0C4DH38	0.883338	0.00354292
A0A0C4DH67	0.671499	0.0145181
A0A0C4DH73	1.05854	0.000393199
A0A0G2JRQ6	0.609946	0.0197907
A2NJV5	0.642809	0.024462
O15439	1.15415	0.00148727
O43707	1.80199	0.00890248
P00390	0.626685	0.0362457
P00918	0.909549	0.0286288
P01034	-0.699262	0.000147413
P01593	0.69634	0.00313931
P01597	1.52187	1.41981e-06
P01601	0.953577	0.00014882
P01602	1.16305	0.000107943
P01619	0.91276	1.07803e-05
P01624	0.824173	0.000354891
P01714	0.596646	0.00233215
P01715	0.710998	0.00748122
P01742	0.880199	0.00269054
P01766	1.72322	4.70747e-08
P01782	1.38819	1.39985e-05
P01817	0.99438	0.000558685
P01834	0.813173	0.000234332
P01861	1.2026	0.000359313
P01877	0.925691	4.72598e-05
P02751	-0.91183	9.13272e-05
P02753	0.606473	0.00302
P02766	-0.589064	0.00326681
P02788	-1.41757	7.33493e-05
P04275	-0.769842	0.0129183
P04430	1.01367	0.00101679
P05090	0.886167	8.09328e-06
P06312	1.01012	8.59616e-06
P06331	1.04192	0.0041288
P08238	-0.65292	0.0094454
P13987	-0.669241	0.0138652
P25311	1.21222	8.12073e-05
P37840	0.989521	0.00109306
P49757	0.589491	0.0256186
P54108	1.0251	1.99937e-06
P59665	1.59164	0.0193372
P61224	2.08638	0.0115651
P62937	-0.579659	0.00422096
P69891	1.20263	0.00275636
Q08380	1.09058	0.000594663
Q14204	-1.59636	0.0011275
Q86XI8	0.808733	0.0362958
Q86YA3	-1.3987	5.34026e-05
Q92835	1.76033	0.000492155
Q9UBF2	1.82409	5.09071e-06
Q9UM73	0.814672	0.017697
Q9UPP5	-1.52866	0.000158593
Q9Y5J7	1.05491	0.000563844

## Sheet: serum EV
gene_name	log2FoldChange	pvalue
A0A0C4DH29	-0.676802	0.0132601
A0A0C4DH43	-0.836472	0.00268378
A2VEC9	0.795994	0.0456318
O15204	-0.68272	0.0252329
O60814;P06899;P23527;P33778;P57053;P58876;P62807;Q16778;Q5QNW6;Q8N257;Q93079;Q96A08;Q99877;Q99879;Q99880	-1.77145	0.0016039
P00740	0.920193	0.000105115
P00742	0.833964	6.0182e-05
P00915	0.835327	0.0398874
P01031	-0.884849	5.84397e-08
P01704	1.10654	0.0484215
P02654	1.04308	0.000819818
P02655	0.823984	0.00639904
P02656	0.897954	0.00726992
P02748	-0.973249	3.15982e-08
P04004	-0.742226	3.69774e-06
P04083	-0.600133	0.0331735
P04908;P0C0S8;P20671;Q7L7L0;Q93077;Q96KK5;Q99878;Q9BTM1	-1.13833	0.0011352
P05109	0.65053	0.000932353
P05156	-0.770292	0.0319796
P06702	0.797799	0.00335229
P07357	-0.992	2.40208e-05
P07358	-0.901743	1.91337e-05
P07360	-1.25282	3.98373e-08
P07437	0.716088	0.0160953
P10643	-1.1008	2.69844e-08
P12259	0.632172	0.00592271
P13671	-1.09152	2.97806e-09
P14923	-0.733832	0.00696402
P23083	-0.667162	0.0267717
P49913	0.595326	0.0223324
P55056	0.983098	0.000728432
P62805	-1.38033	0.0024231
P63261	1.00295	0.0356929
P68431	-1.12681	0.00651631
P81605	-0.755432	0.0248463
Q02413	-0.860291	0.0122199
Q12846	0.627814	0.00171738
Q14764	-0.734255	0.0140124
Q16610	-0.592948	0.00314463
Q59EK9	0.725725	0.00181989
Q6ZN18	1.2233	0.00731989
Q96IY4	-1.14961	4.95148e-07
Q9BXR6	-1.19155	5.69439e-07
