# Supplementary material for: A comprehensive view of the molecular features within the serum and serum EV of Alzheimer's disease
Source: Royal Society of Chemistry journal article supplement (doi:10.1039/d4an01018c), 2025-01-01
Supplement: d4an01018c9.xlsx [file d4an01018c9.xlsx]

## Sheet: external data
AD incident
ACTA2
ADA2
ADAM12
ADAM15
ADAM9
ADAMTS1
ADAMTS8
ADGRG1
ADIPOQ
ADM
AGR2
AHNAK
AMOTL2
ANPEP
APCS
APOA2
APOE
AREG
BCAN
BRK1
C1QA
C7
CA12
CA4
CALB1
CASC3
CD244
CD276
CD59
CD99L2
CDHR5
CEACAM5
CEMIP2
CEND1
CENPJ
CES1
CES3
CFB
CHGA
CHI3L1
CHM
CKB
CLEC3B
CLEC5A
CPXM2
CSF1
CSF3
CSNK2A1
CSPG4
CST1
CST5
CX3CL1
DAND5
DCBLD2
DCN
DDX39A
DSC2
DSG2
EBI3_IL27
EDA2R
EFHD1
EGFR
ENPEP
EPHA2
ERBB2
ERBB3
ERN1
ESM1
F7
FAM3B
FAP
FCER1A
FCRL5
FGF5
FN1
FRMD7
FSTL1
FURIN
GAST
GDF15
GFAP
GFRA2
GHR
HPGDS
HS6ST2
IGFBP2
IGFBP3
IGFBP7
IGSF9
IL10
IL17C
IL19
IL1R1
IL1RL1
IL31RA
IL32
KLK4
KLKB1
LCAT
LDLR
LGALS4
LMOD1
LRIG3
LRRN1
LRTM2
LTBP2
MAN2B2
MENT
MYBPC1
MYL3
MYLPF
NCAM1
NCR1
NCS1
NEFL
NEK7
NPTX2
NPTXR
NRP1
NRXN3
NTproBNP
OGN
OMG
PALM
PARD3
PDGFC
PDGFRA
PEPD
PI3
PILRA
PILRB
PLAUR
PPL
PSG1
PTPRF
PTPRN2
PTX3
PVR
RAC3
RBFOX3
RBP7
REG1A
REG3A
REG4
REN
ROR1
RSPO3
S100P
SCARF2
SCGN
SEMA7A
SERPINA11
SERPINA5
SHISA5
SIGLEC5
SLC13A1
SLC39A5
SNAP25
SPINK1
SPINK4
SPOCK1
SPON1
SPP1
SRPX
SSC4D
STOML2
SV2A
SYT1
TCN1
TCN2
TFF1
TFF3
TGFA
TGFBR1
TIMP4
TINAGL1
TMCO5A
TNC
TNFRSF10A
TNFRSF11B
TNFRSF6B
TNFSF10
TNFSF11
TNIP1
TRIM58
TTR
VCAM1
VGF
VSIG2
VSNL1
WFDC2
WFIKKN1
WNT9A
